# Supplementary material for: Photochemical Strategy Enables the De Novo Synthesis of Saturated Bicyclic Amine Collections
Source: Research Square preprint supplement (doi:10.21203/rs.3.rs-5408976/v1), 2024-12-03
Supplement: Supplementary file 1 [file 116e7c8c0c70f24730619f75.pdf]

# Supporting Information

## Photochemical Strategy Enables the *De Novo* Synthesis of Saturated Bicyclic Amine Collections

Dewei Feng,<sup>1,2</sup> Xiao Geng,<sup>1,\*</sup> Lingling Zuo,<sup>1</sup> Zhifang Li,<sup>2</sup> and Lei Wang<sup>1,2\*</sup>

1. Advanced Research Institute and School of Pharmaceutical Sciences, Taizhou University, Jiaojiang 318000, Zhejiang, P. R. China
2. Key Laboratory of Organosilicon Chemistry and Material Technology of Ministry of Education, Hangzhou Normal University, Hangzhou 311121, Zhejiang, P. R. China

### Table of Contents

|                                                                                    |           |
|------------------------------------------------------------------------------------|-----------|
| <b>1. General information .....</b>                                                | <b>2</b>  |
| <b>2. Experimental procedure.....</b>                                              | <b>3</b>  |
| 2.1 General procedure for the synthesis of starting materials <b>1</b> .....       | 3         |
| 2.2 General procedure for the synthesis of starting materials <b>2</b> .....       | 4         |
| 2.3 General procedure for the synthesis of products ( <b>3</b> as an example)..... | 10        |
| <b>3. Optimization reaction conditions .....</b>                                   | <b>12</b> |
| <b>4. Characterization data of products .....</b>                                  | <b>13</b> |
| <b>5. Gram level reaction and derivatization experiments .....</b>                 | <b>49</b> |
| 5.1 General procedure for the synthesis of <b>3</b> in 3.0 mmol scale .....        | 49        |
| 5.2 General procedure for the reduction of <b>3</b> .....                          | 50        |
| 5.3 General procedure for the derivatization of <b>65</b> .....                    | 51        |
| <b>6. Mechanistic studies .....</b>                                                | <b>53</b> |
| <b>7. X-ray structure and data for <b>33</b>, <b>43</b>, <b>55</b>.....</b>        | <b>56</b> |
| <b>8. References.....</b>                                                          | <b>60</b> |
| <b>9. NMR spectra of the products.....</b>                                         | <b>61</b> |

## 1. General information

Unless otherwise noted, all commercially available compounds were used as provided without further purification. All reactions were monitored by thin-layer chromatography (TLC) on silica gel plates using UV light as visualizing agent. Compounds were visualized by irradiation with UV light or potassium permanganate staining. Flash column chromatography was performed using 200–300 or 300–400 mesh silica gel.

All  $^1\text{H}$  NMR,  $^{13}\text{C}$  NMR and  $^{19}\text{F}$  NMR spectra were recorded on Bruker Avance III HD 400 spectrometer. Chemical shifts ( $\delta$ ) were reported in parts per million (ppm) relative to residual solvent peaks rounded to the nearest 0.01 for proton and 0.1 for carbon (ref:  $\text{CDCl}_3$  [ $^1\text{H}$ : 0.00 (TMS),  $^{13}\text{C}$ : 77.00;  $\text{DMSO-d}_6$  [ $^1\text{H}$ : 2.50,  $^{13}\text{C}$ : 39.50]. Coupling constants ( $J$ ) were reported in Hz to the nearest 0.1 Hz. Peak multiplicity was indicated as follows s (singlet), d (doublet), t (triplet), q (quartet), m (multiplet). Attribution of peaks was done using the multiplicities and integrals of the peaks. High resolution mass spectroscopy data of the product were collected on the accurate masses were measured by the Q-Exactive mass spectrometer (Thermo Scientific, Sunnyvale, CA, USA) with heated electrospray ionization (HESI-II). Melting points were measured using a Stuart SMP30. Crystallographic data of product **33**, **43**, and **55** were collected on Bruker SMART APEX II (Mo target, voltage 50 KV, current 30 mA). Melting points were measured using a Stuart SMP30.

## 2. Experimental procedure

### 2.1 General procedure for the synthesis of starting materials 1

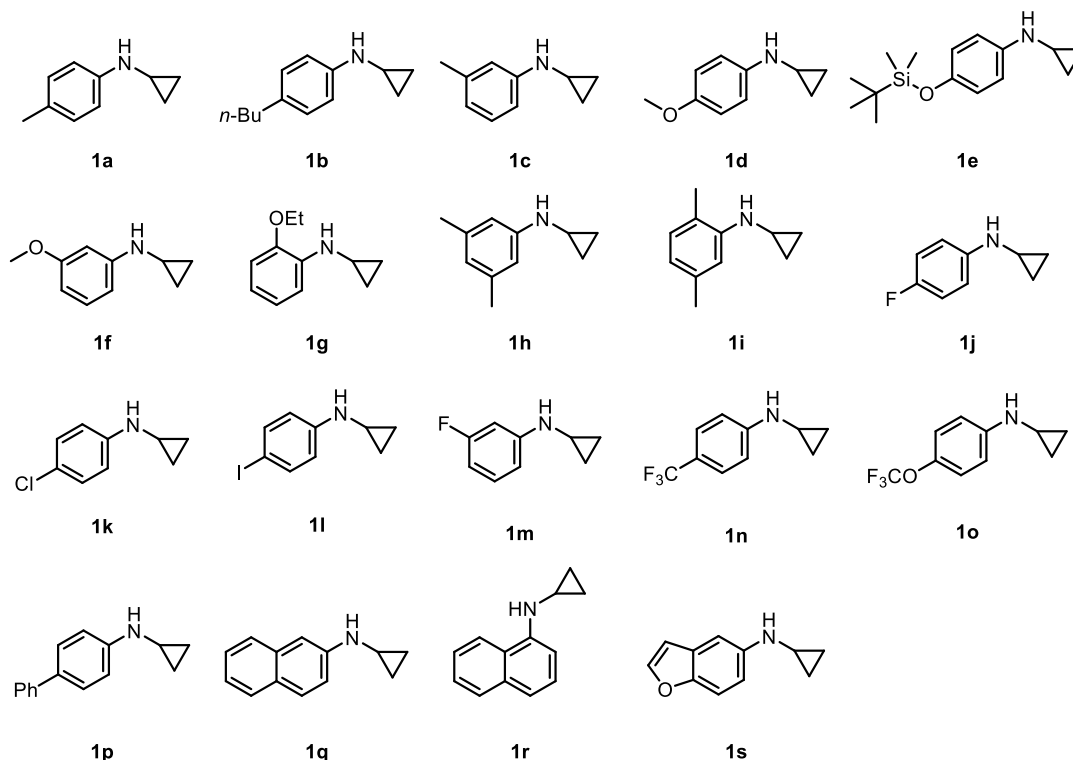

Note: Substrates **1a–1s** were prepared according to the reported procedure.<sup>[1]</sup>

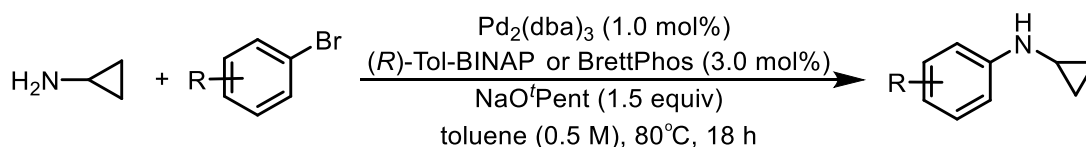

Following modified procedure,<sup>[1]</sup> an oven-dried microwave vial was charged with  $\text{Pd}_2(\text{dba})_3$  (1.0 mol%) and BrettPhos (3.0 mol%) or (*R*)-Tol-BINAP (3.0 mol%). The vial was sealed, evacuated, and back-filled with nitrogen (3 times). Then, toluene (0.5 M), cyclopropylamine (1.6 equiv.), aromatic bromide (1.0 equiv.) and NaO<sup>t</sup>Pent (25% solution in toluene, 1.5 equiv.) were added via syringe to the vial, and it was heated at 80 °C overnight. The reaction mixture was then cooled to room temperature, diluted with Et<sub>2</sub>O, and filtered through a short pad of silica. The filtrate was evaporated under reduced pressure, and the crude residue was purified by column chromatography (silica gel, petroleum ether/ethyl acetate = 100:1) to afford the desired product **1a–1s**, respectively. All recorded spectroscopic data matched those previously reported in the literature.

## 2.2 General procedure for the synthesis of starting materials 2

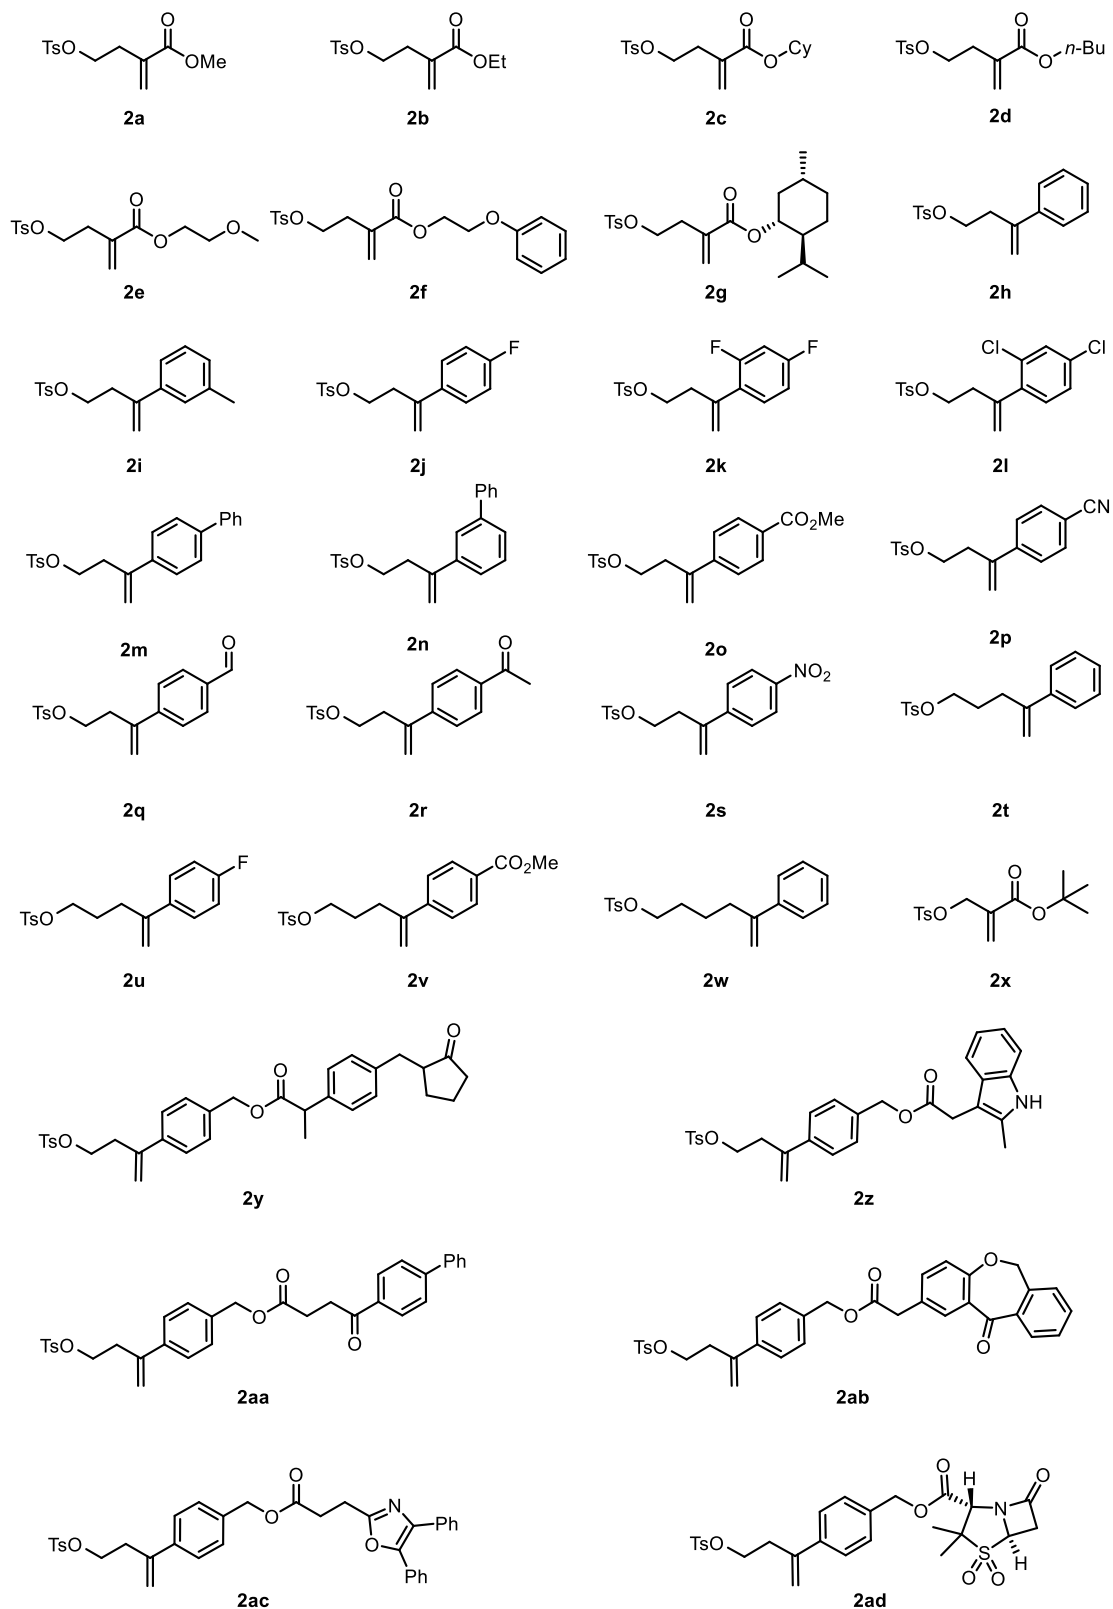

Note: Substrates **2** were prepared according to the reported procedure<sup>[2]</sup>, and **2a–2s**, **2y–2ad** were known products.



### General procedure A for the synthesis of 2a–2g

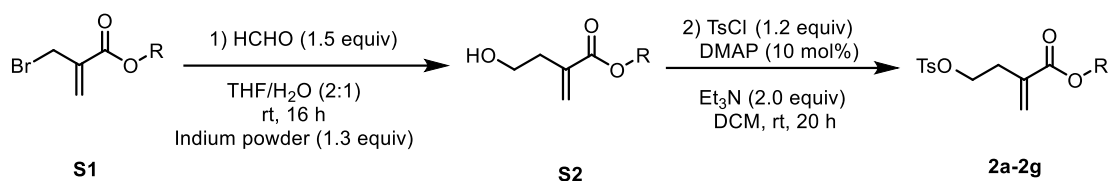

To a flask equipped with a magnetic stir bar was added **S1** (1.0 equiv.), THF and H<sub>2</sub>O (2:1, 0.3 M) were then added with vigorous stirring, followed by formaldehyde (1.5 equiv.) and indium powder (1.3 equiv.). The reaction mixture was stirred vigorously for 16 h, then partitioned between EtOAc (30 mL) and H<sub>2</sub>O (50 mL). The phases were separated and the aqueous phase was extracted into EtOAc (2 × 30 mL). The combined organic phases were washed with brine (50 mL), dried (MgSO<sub>4</sub>), filtered, and concentrated in vacuo. The residue was purified by flash column chromatography gave **S2**.

Add **S2** (1.0 equiv.) to a flask equipped with a magnetic stir bar, followed by the addition of DCM (0.5 M), DMAP (0.1 equiv.) and *p*-toluenesulfonyl chloride (1.2 equiv.), then add triethylamine (2.0 equiv.) dropwise at 0 °C. After 20 h, aqueous 1 M HCl (20 mL) was added and the phases were separated. The aqueous phase was extracted into DCM (3 × 20 mL) and the combined organic phases dried (MgSO<sub>4</sub>), filtered, and concentrated in vacuo. The crude residue was purified by column chromatography (silica gel, petroleum ether/ethyl acetate = 10:1-5:1) to afford the product **2a–2g**, respectively. All recorded spectroscopic data matched those previously reported in the literature<sup>[2]</sup>.

### General procedure B for the synthesis of 2h–2w

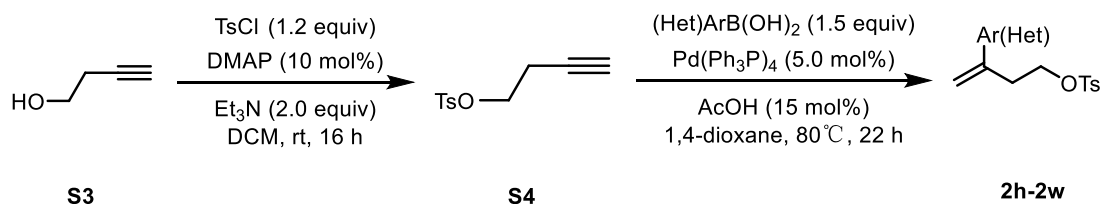

**S4** was prepared following the general procedure **B** with **S3** (15.0 mmol). The crude product was purified by flash column chromatography (20% EtOAc /hexane) to

afford **S4** (3.04 g, 13.5 mmol, 90%) as a pale yellow oil. Under an N<sub>2</sub> atmosphere **S4** (1.12 g, 5.0 mmol, 1.0 equiv.), Pd(PPh<sub>3</sub>)<sub>4</sub> (289 mg, 0.25 mmol, 5.0 mol%) and phenylboronic acid (914 mg, 7.5 mmol, 1.5 equiv.) were placed in a thick-walled glass vessel. 1,4-dioxane (20 mL) and AcOH (45 mg, 0.75 mmol, 15 mol%) were added and the solution was stirred at rt for 15 min, then at 80 °C for 22 h. The reaction was cooled to rt and the 1,4-dioxane was removed in vacuo. The crude residue was purified by column chromatography (silica gel, petroleum ether/ethyl acetate = 20:1~5:1) to afford the product **2h–2w**, respectively. All recorded spectroscopic data matched those previously reported in the literature<sup>[2]</sup>.

#### 4-Phenylpent-4-en-1-yl 4-methylbenzenesulfonate (**2t**)

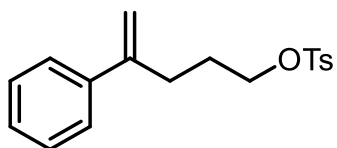

**2t** was prepared following the general procedure **B** with phenylboronic acid. The crude residue was purified by column chromatography (silica gel, petroleum ether/ethyl acetate = 5:1) to afford product **2t** (1.32 g, 84% over two steps) as yellow oil.

**<sup>1</sup>H NMR** (400 MHz, CDCl<sub>3</sub>)  $\delta$  7.71 (d,  $J$  = 8.4 Hz, 2H), 7.27–7.23 (m, 5H), 7.23–7.15 (m, 2H), 5.18 (s, 1H), 4.92 (s, 1H), 3.97 (t,  $J$  = 6.4 Hz, 2H), 2.47 (t,  $J$  = 7.6 Hz, 2H), 2.36 (s, 3H), 1.75–1.64 (m, 2H).

**<sup>13</sup>C NMR** (100 MHz, CDCl<sub>3</sub>)  $\delta$  146.5, 144.8, 140.3, 133.0, 129.8, 128.4, 127.8, 127.5, 126.0, 113.3, 69.9, 30.9, 27.2, 21.6.

**HRMS (ESI)  $m/z$** : Calcd for C<sub>18</sub>H<sub>21</sub>O<sub>3</sub>S<sup>+</sup> [ $M + H$ ]<sup>+</sup>: 317.1206; found: 317.1204.

#### 4-(4-Fluorophenyl)pent-4-en-1-yl 4-methylbenzenesulfonate (**2u**)

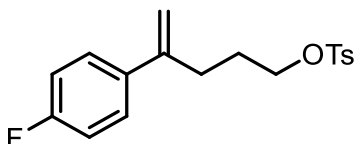

**2u** was prepared following the general procedure **B** with 4-fluorobenzeneboronic acid. The crude residue was purified by column chromatography (silica gel, petroleum

ether/ethyl acetate = 5:1) to afford product **2u** (963 mg, 63% over two steps) as colorless oil.

**<sup>1</sup>H NMR** (400 MHz, CDCl<sub>3</sub>)  $\delta$  7.77 (d,  $J$  = 8.0 Hz, 2H), 7.36–7.25 (m, 4H), 6.98 (t,  $J$  = 8.4 Hz, 2H), 5.20 (s, 1H), 4.97 (s, 1H), 4.03 (t,  $J$  = 6.0 Hz, 2H), 2.52 (t,  $J$  = 7.2 Hz, 2H), 2.45 (s, 3H), 1.82–1.72 (m, 2H).

**<sup>13</sup>C NMR** (100 MHz, CDCl<sub>3</sub>)  $\delta$  162.5 (d,  $J$  = 246.5 Hz), 145.7, 144.9, 136.6 (d,  $J$  = 3.0 Hz), 133.2, 130.0, 128.0, 127.8 (d,  $J$  = 7.9 Hz), 115.3 (d,  $J$  = 21.3 Hz), 113.4, 69.9, 31.3, 27.3, 21.8.

**<sup>19</sup>F NMR** (376 MHz, CDCl<sub>3</sub>)  $\delta$  -114.90 (s).

**HRMS (ESI)  $m/z$** : Calcd for C<sub>18</sub>H<sub>20</sub>FO<sub>3</sub>S<sup>+</sup> [M + H]<sup>+</sup>: 355.1112; found: 355.1110.

**Methyl 4-(5-(tosyloxy)pent-1-en-2-yl)benzoate (2v):**

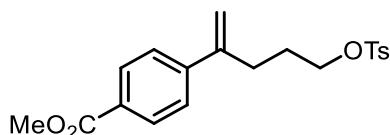

**2v** was prepared following the general procedure **B** with 4-methoxycarbonylphenylboronic acid. The crude residue was purified by column chromatography (silica gel, petroleum ether/ethyl acetate = 5:1) to afford product **2v** (1.38 g, 74% over two steps) as colorless oil.

**<sup>1</sup>H NMR** (400 MHz, CDCl<sub>3</sub>)  $\delta$  7.95 (d,  $J$  = 8.0 Hz, 2H), 7.76 (d,  $J$  = 7.6 Hz, 2H), 7.36 (d,  $J$  = 8.0 Hz, 2H), 7.31 (d,  $J$  = 7.6 Hz, 2H), 5.33 (s, 1H), 5.08 (s, 1H), 4.03 (t,  $J$  = 5.6 Hz, 2H), 3.89 (s, 3H), 2.55 (t,  $J$  = 6.8 Hz, 2H), 2.42 (s, 3H), 1.81–1.70 (m, 2H).

**<sup>13</sup>C NMR** (100 MHz, CDCl<sub>3</sub>)  $\delta$  166.7, 145.7, 144.9, 144.8, 133.0, 129.8, 129.7, 129.1, 127.8, 126.0, 115.1, 69.7, 52.0, 30.7, 27.1, 21.6.

**HRMS (ESI)  $m/z$** : Calcd for C<sub>20</sub>H<sub>23</sub>O<sub>5</sub>S<sup>+</sup> [M + H]<sup>+</sup>: 375.1261; found: 375.1258.

**5-Phenylhex-5-en-1-yl 4-methylbenzenesulfonate (2w)**

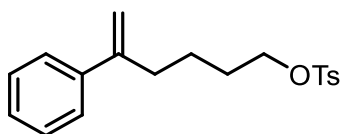

**2w** was prepared following the general procedure **B** with 4-methoxycarbonylphenylboronic acid. The crude residue was purified by column chromatography (silica gel, petroleum ether/ethyl acetate = 5:1) to afford product **2w** (1.46 g, 88% over two steps) as colorless oil.

**<sup>1</sup>H NMR** (400 MHz, CDCl<sub>3</sub>)  $\delta$  7.75 (d,  $J$  = 8.4 Hz, 2H), 7.34–7.23 (m, 7H), 5.25–4.95 (m, 2H), 3.99 (t,  $J$  = 6.4 Hz, 2H), 2.41 (s, 5H), 1.69–1.61 (m, 2H), 1.48–1.38 (m, 2H).

**<sup>13</sup>C NMR** (100 MHz, CDCl<sub>3</sub>)  $\delta$  147.72, 144.77, 140.91, 133.13, 129.88, 128.37, 127.90, 127.49, 126.10, 112.78, 77.48, 77.16, 76.84, 70.44, 34.51, 28.33, 23.88, 21.66.

**HRMS (ESI) m/z**: Calcd for C<sub>19</sub>H<sub>23</sub>O<sub>3</sub>S<sup>+</sup> [M + H]<sup>+</sup>: 331.1362; found: 331.1360.

### General procedure C for the synthesis of 2y–2ad

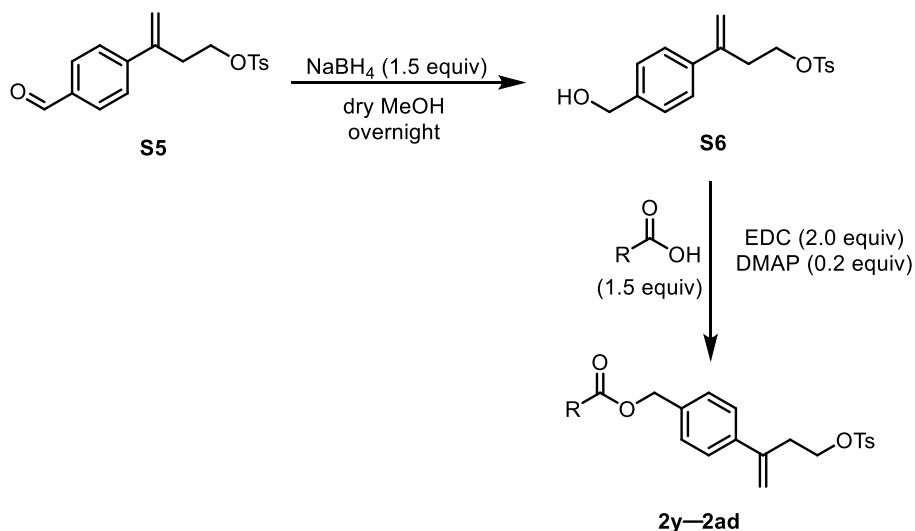

To a flask equipped with a magnetic stir bar was added **S5** (1.28 g, 3.87 mmol, 1.0 equiv), dry MeOH (20 mL) were then added with vigorous stirring, followed by NaBH<sub>4</sub> (219 mg, 5.8 mmol, 1.5 equiv). The reaction mixture was stirred vigorously for overnight, then partitioned between EtOAc (25 mL) and H<sub>2</sub>O (30 mL). The phases were separated and the aqueous phase was extracted into EtOAc (2 × 25 mL). The combined organic phases were washed with brine (30 mL), dried (MgSO<sub>4</sub>), filtered, and concentrated in vacuo. The crude residue was purified by column chromatography (silica gel, petroleum ether/ethyl acetate = 2:1) to afford the product **S6** (1.16g, 3.49 mmol, 90%) as light yellow liquid.

Added **S6** (1.5 equiv.) to a solution of acid (1.5 equiv.), DMAP (0.2 equiv.) and EDC (2.0 equiv.) in dry DCM (0.5 M) at 0 °C. Warm the reaction mixture to rt and stir for 17 h. The crude residue was purified by column chromatography (silica gel, petroleum ether/ethyl acetate = 10:1~5:1) to afford the product **2y–2ad**. All recorded spectroscopic data matched those previously reported in the literature<sup>[2]</sup>.

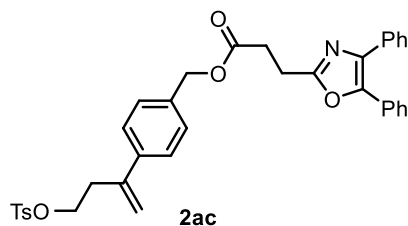

**<sup>1</sup>H NMR** (400 MHz, CDCl<sub>3</sub>)  $\delta$  7.72 (d,  $J$  = 8.4 Hz, 2H), 7.64–7.60 (m, 2H), 7.57–7.53 (m, 2H), 7.36–7.30 (m, 6H), 7.29–7.24 (m, 4H), 7.20–7.17 (m, 2H), 5.31 (s, 1H), 5.15 (s, 2H), 5.07 (s, 1H), 4.08 (t,  $J$  = 7.2 Hz, 2H), 3.21 (t,  $J$  = 7.2 Hz, 2H), 2.98 (t,  $J$  = 7.2 Hz, 2H), 2.81 (t,  $J$  = 7.2 Hz, 2H), 2.42 (s, 3H).

**<sup>13</sup>C NMR** (100 MHz, CDCl<sub>3</sub>)  $\delta$  171.9, 161.7, 145.5, 144.8, 142.3, 139.7, 135.4, 135.2, 133.1, 132.5, 129.9, 129.0, 128.7, 128.63, 128.57, 128.3, 128.2, 128.0, 127.9, 126.6, 126.2, 115.7, 68.6, 66.2, 34.7, 31.2, 23.6, 21.7.

**HRMS (ESI)  $m/z$ :** Calcd for C<sub>36</sub>H<sub>34</sub>O<sub>6</sub>S<sup>+</sup> [ $M + H$ ]<sup>+</sup>: 608.2101; found: 608.2100.

#### General procedure D for the synthesis of **2x**<sup>[3]</sup>

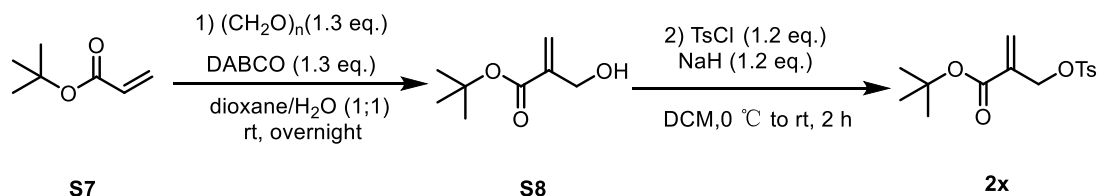

To a flask equipped with a magnetic stir bar was added (CH<sub>2</sub>O)<sub>n</sub> (390 mg, 13.0 mmol, 1.3 equiv.), DABCO (1.59 g, 13.0 mmol, 1.3 equiv.) and dioxane/H<sub>2</sub>O (50 mL/50 mL) were then added with vigorous stirring, followed by *tert*-butyl acrylate (1.28 g, 10.0 mmol, 1.0 equiv.). The reaction mixture was stirred vigorously for overnight, then partitioned between EtOAc (60 mL) and H<sub>2</sub>O (40 mL). The phases were separated and the aqueous phase was extracted into EtOAc (2 × 60 mL). The combined

organic phases were washed with brine (50 mL), dried (MgSO<sub>4</sub>), filtered, and concentrated in vacuo. The crude residue was purified by column chromatography (silica gel, petroleum ether/ethyl acetate = 5:1) to afford product **S8** (1.39 g, 8.7 mmol, 87%). Then to a stirred solution of 1.39 g (8.8 mmol) of ester **S8** and 2.06 g (10.6 mmol) of *p*-toluenesulfonyl chloride in 100 mL of CH<sub>2</sub>Cl<sub>2</sub> under N<sub>2</sub> at 0 °C was added 422 mg (10.6 mmol) of NaH (60% dispersion in mineral oil). After the mixture had been allowed to warm to room temperature for 2 h, 75 mL of water was added. The resulting mixture was transferred to a separatory funnel, and the layers were separated. The aqueous layer was extracted with CH<sub>2</sub>Cl<sub>2</sub> (2 × 150 mL). The combined organic layers were washed with water (1 × 75 mL) and brine (1 × 75 mL), dried over MgSO<sub>4</sub>, and filtered. The solvent was removed in vacuo, and the crude residue was purified by column chromatography (silica gel, petroleum ether/ ethyl acetate = 20:1) to afford product **2x** (1.78 g, 65%).

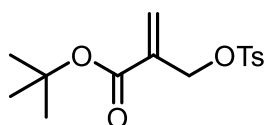

**2x**

**<sup>1</sup>H NMR** (400 MHz, CDCl<sub>3</sub>)  $\delta$  7.80 (d, *J* = 8.4 Hz, 2H), 7.35 (d, *J* = 8.0 Hz, 2H), 6.27 (d, *J* = 0.4 Hz, 1H), 5.84 (d, *J* = 0.8 Hz, 1H), 4.71 (s, 2H), 2.45 (s, 3H), 1.46 (s, 9H).

**<sup>13</sup>C NMR** (100 MHz, CDCl<sub>3</sub>)  $\delta$  163.7, 145.0, 135.1, 133.1, 130.0, 128.0, 127.7, 81.9, 68.0, 28.0, 21.7.

**HRMS (ESI) *m/z***: Calcd for C<sub>15</sub>H<sub>21</sub>O<sub>5</sub>S<sup>+</sup> [*M* + *H*]<sup>+</sup>: 313.1104; found: 313.1103.

### 2.3 General procedure for the synthesis of product (**3** as an example)

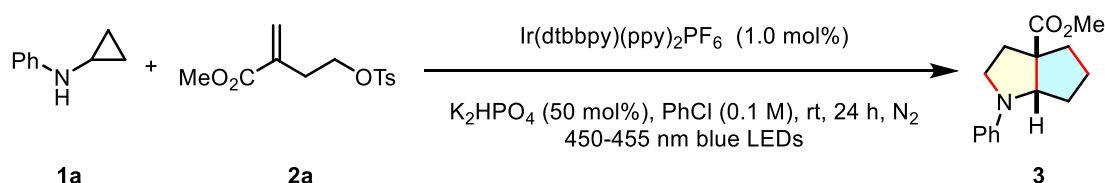

In the glove box, a 10 mL Schlenk tube equipped with a magnetic stir bar was charged with *N*-phenyl cyclopropylamine **1a** (53.2 mg, 0.4 mmol), **2a** (56.8 mg, 0.2 mmol), Ir(dtbbpy)(ppy)<sub>2</sub>PF<sub>6</sub> (1.8 mg, 0.002 mmol, 1 mol%), K<sub>2</sub>HPO<sub>4</sub> (17.4 mg, 0.1 mmol, 50 mol%) and PhCl (2.0 mL). The reaction mixture was stirred under 2×3 W blue LEDs ( $\lambda = 450\text{--}455\text{ nm}$ ) at room temperature with stirring for 24 h. After completion of the reaction, the solvent was removed under reduced pressure, and the residue was purified with silica gel chromatography (petroleum ether/ethyl acetate = 100:1, V/V) to give the product **3**.

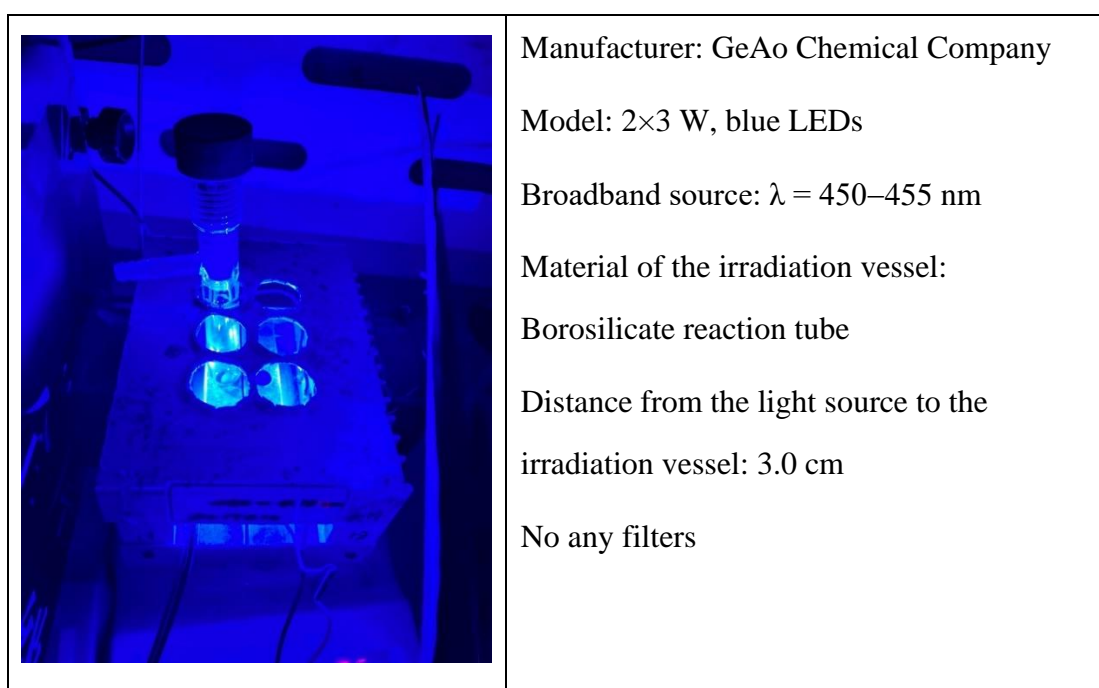

**Figure S1.** Photoreactor used in this research (2×3 W blue LEDs)

### 3. Optimization reaction conditions

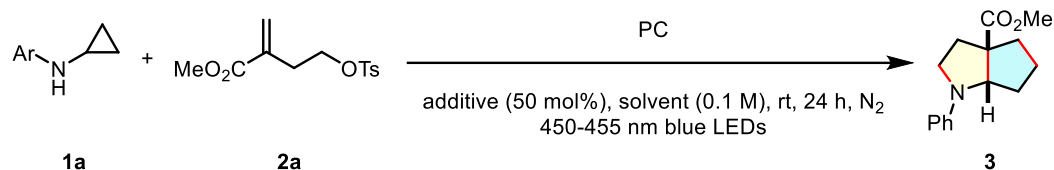

| Entry           | Solvent           | Molar Ratio of <b>1a</b> : <b>2a</b> | PC         | Additive                            | Yield of <b>3</b> (%) <sup>b</sup> |
|-----------------|-------------------|--------------------------------------|------------|-------------------------------------|------------------------------------|
| 1               | DMA               | 1 : 2                                | PC1        | —                                   | 40                                 |
| 2               | DMA               | 1 : 2                                | PC1        | K <sub>2</sub> HPO <sub>4</sub>     | 57                                 |
| 3               | DMA               | 1 : 2                                | PC1        | NaH <sub>2</sub> PO <sub>4</sub>    | 50                                 |
| 4               | DMA               | 1 : 2                                | PC1        | NaHCO <sub>3</sub>                  | 51                                 |
| 5               | DMA               | 1 : 2                                | PC1        | CsF                                 | 46                                 |
| 6               | DMA               | 1 : 2                                | PC1        | Cs <sub>2</sub> CO <sub>3</sub>     | 32                                 |
| 7               | DMA               | 1 : 2                                | PC1        | DABCO                               | 46                                 |
| 8               | DMA               | 1 : 2                                | PC1        | Et <sub>3</sub> N                   | 39                                 |
| 9               | DMA               | 1 : 1                                | PC1        | K <sub>2</sub> HPO <sub>4</sub>     | 53                                 |
| 10              | DMA               | 1.5 : 1                              | PC1        | K <sub>2</sub> HPO <sub>4</sub>     | 61                                 |
| 11              | DMA               | 2 : 1                                | PC1        | K <sub>2</sub> HPO <sub>4</sub>     | 66                                 |
| 12              | DMA               | 3 : 1                                | PC1        | K <sub>2</sub> HPO <sub>4</sub>     | 36                                 |
| 13              | DMF               | 2 : 1                                | PC1        | K <sub>2</sub> HPO <sub>4</sub>     | 48                                 |
| <b>14</b>       | <b>PhCl</b>       | <b>2 : 1</b>                         | <b>PC1</b> | <b>K<sub>2</sub>HPO<sub>4</sub></b> | <b>81</b>                          |
| 15              | PhF               | 2 : 1                                | PC1        | K <sub>2</sub> HPO <sub>4</sub>     | 80                                 |
| 16              | PhCF <sub>3</sub> | 2 : 1                                | PC1        | K <sub>2</sub> HPO <sub>4</sub>     | 61                                 |
| 17              | ethyl benzene     | 2 : 1                                | PC1        | K <sub>2</sub> HPO <sub>4</sub>     | 69                                 |
| 18              | toluene           | 2 : 1                                | PC1        | K <sub>2</sub> HPO <sub>4</sub>     | 63                                 |
| 19              | trimethylbenzene  | 2 : 1                                | PC1        | K <sub>2</sub> HPO <sub>4</sub>     | 70                                 |
| 20              | PhCl              | 2 : 1                                | PC2        | K <sub>2</sub> HPO <sub>4</sub>     | 69                                 |
| 21              | PhCl              | 2 : 1                                | PC3        | K <sub>2</sub> HPO <sub>4</sub>     | 18                                 |
| 22              | PhCl              | 2 : 1                                | PC4        | K <sub>2</sub> HPO <sub>4</sub>     | 51                                 |
| 23              | PhCl              | 2 : 1                                | PC1        | —                                   | 71                                 |
| 24 <sup>c</sup> | PhCl              | 2 : 1                                | PC1        | K <sub>2</sub> HPO <sub>4</sub>     | 0                                  |
| 25 <sup>d</sup> | PhCl              | 2 : 1                                | PC1        | K <sub>2</sub> HPO <sub>4</sub>     | 0                                  |
| 26 <sup>e</sup> | PhCl              | 2 : 1                                | PC1        | K <sub>2</sub> HPO <sub>4</sub>     | 0                                  |

<sup>a</sup>Reaction conditions: **1a** (x mmol), **2a** (y mmol), PC (1.0 mol%), DMA (1.0 mL, 0.1M), rt, 24 h, N<sub>2</sub>, 450–455nm. <sup>b</sup>Isolated yield. <sup>c</sup>No light. <sup>d</sup>No PC. <sup>e</sup>Under air. PC1 = Ir(dtbbpy)(ppy)<sub>2</sub>PF<sub>6</sub> (1 mol%); PC2 = *fac*-Ir(ppy)<sub>3</sub> (1 mol%); PC3 = Ru(dbz)<sub>3</sub>(ppy)<sub>2</sub> (1 mol%); PC4 = 4CzIPN (5 mol%).



#### 4. Characterization data of products

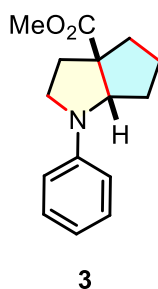

##### Methyl 1-phenylhexahydrocyclopenta[*b*]pyrrole-3a(1*H*)-carboxylate

39.6 mg, 81 % yield. Yellow oil (Flash column chromatography eluent, petroleum ether/ethyl acetate = 100/1, V/V).

**<sup>1</sup>H NMR** (400 MHz, CDCl<sub>3</sub>)  $\delta$  7.22 (t,  $J$  = 7.6 Hz, 1H), 6.71 (dd,  $J$  = 16.4, 8.4 Hz, 1H), 6.61 (d,  $J$  = 8.0 Hz, 1H), 4.13 (dd,  $J$  = 6.8, 2.0 Hz, 1H), 3.62 (s, 3H), 3.47–3.42 (m, 1H), 3.27–3.15 (m, 1H), 2.48–2.40 (m, 1H), 2.10–1.99 (m, 1H), 1.94–1.82 (m, 2H), 1.79–1.62 (m, 4H).

**<sup>13</sup>C NMR** (100 MHz, CDCl<sub>3</sub>)  $\delta$  177.2, 147.5, 129.2, 116.5, 113.1, 68.7, 60.0, 52.4, 48.8, 37.0, 34.5, 33.4, 25.1.

**HRMS (ESI)  $m/z$** : Calcd for C<sub>15</sub>H<sub>20</sub>NO<sub>2</sub><sup>+</sup> [ $M + H$ ]<sup>+</sup>: 246.1489; found: 246.1488.

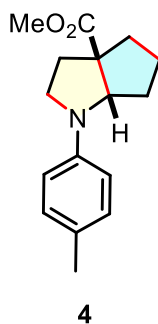

##### Methyl 1-(*p*-tolyl)hexahydrocyclopenta[*b*]pyrrole-3a(1*H*)-carboxylate

33.6 mg, 65 % yield. Yellow oil (Flash column chromatography eluent, petroleum ether/ethyl acetate = 100/1, V/V).

**<sup>1</sup>H NMR** (400 MHz, CDCl<sub>3</sub>)  $\delta$  7.06 (d,  $J$  = 8.4 Hz, 2H), 6.56 (d,  $J$  = 8.4 Hz, 2H), 4.21–4.14 (m, 1H), 3.69 (s, 3H), 3.56–3.47 (m, 1H), 3.30–3.21 (m, 1H), 2.58–2.47 (m, 1H), 2.27 (s, 3H), 2.16–2.08 (m, 1H), 1.99–1.89 (m, 2H), 1.86–1.70 (m, 4H).

$^{13}\text{C}$  NMR (100 MHz,  $\text{CDCl}_3$ )  $\delta$  177.3, 145.6, 129.7, 125.7, 113.2, 69.0, 60.0, 52.3, 49.1, 37.1, 34.6, 33.5, 25.1, 20.4.

HRMS (ESI)  $m/z$ : Calcd for  $\text{C}_{16}\text{H}_{22}\text{NO}_2^+$   $[\text{M} + \text{H}]^+$ : 260.1645; found: 260.1642.

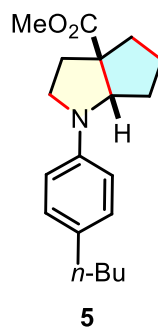

**Methyl 1-(4-butylphenyl)hexahydrocyclopenta[*b*]pyrrole-3a(1*H*)-carboxylate**

56 mg, 93 % yield. Yellow oil (Flash column chromatography eluent, petroleum ether/ethyl acetate = 100/1, V/V).

$^1\text{H}$  NMR (400 MHz,  $\text{CDCl}_3$ )  $\delta$  7.08 (d,  $J$  = 8.4 Hz, 2H), 6.58 (d,  $J$  = 8.4 Hz, 2H), 4.21–4.17 (m, 1H), 3.70 (s, 3H), 3.56–3.51 (m, 1H), 3.30–3.24 (m, 1H), 2.56–2.51 (m, 3H), 2.17–2.08 (m, 1H), 2.00–1.91 (m, 2H), 1.90–1.73 (m, 4H), 1.61–1.56 (m, 2H), 1.40–1.34 (m, 2H), 0.94 (t,  $J$  = 7.2 Hz, 3H).

$^{13}\text{C}$  NMR (100 MHz,  $\text{CDCl}_3$ )  $\delta$  177.2, 145.7, 130.9, 129.1, 113.0, 68.9, 60.0, 52.3, 49.0, 37.1, 34.7, 34.5, 34.2, 33.5, 25.1, 22.5, 14.1.

HRMS (ESI)  $m/z$ : Calcd for  $\text{C}_{19}\text{H}_{28}\text{NO}_2^+$   $[\text{M} + \text{H}]^+$ : 302.2115; found: 302.2112.

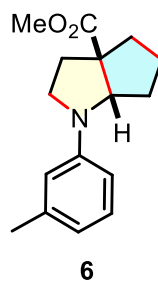

**Methyl 1-(*m*-tolyl)hexahydrocyclopenta[*b*]pyrrole-3a(1*H*)-carboxylate**

48.2 mg, 93 % yield. Colorless oil (Flash column chromatography eluent, petroleum ether/ethyl acetate = 100/1, V/V).

**<sup>1</sup>H NMR** (400 MHz, CDCl<sub>3</sub>) δ 7.18–7.11 (m, 1H), 6.57 (d, *J* = 7.6 Hz, 1H), δ 6.48 – 6.42 (m, 2H), 4.25 – 4.20 (m, 1H), 3.71 (s, 3H), 3.57–3.50 (m, 1H), 3.34–3.26 (m, 1H), 2.56–2.48 (m, 1H), 2.34 (s, 3H), 2.18–2.09 (m, 1H), 2.01–1.93 (m, 2H), 1.87–1.71 (m, 4H).

**<sup>13</sup>C NMR** (100 MHz, CDCl<sub>3</sub>) δ 177.2, 147.5, 138.9, 129.1, 117.4, 113.8, 110.3, 68.7, 60.0, 52.3, 48.8, 37.0, 34.4, 33.5, 25.1, 22.0.

**HRMS (ESI) *m/z***: Calcd for C<sub>16</sub>H<sub>22</sub>NO<sub>2</sub><sup>+</sup> [*M* + *H*]<sup>+</sup>: 260.1645; found: 260.1642.

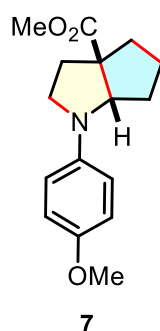

**Methyl 1-(4-methoxyphenyl)hexahydrocyclopenta[*b*]pyrrole-3a(1*H*)-carboxylate**

24.8 mg, 45 % yield. Yellow oil (Flash column chromatography eluent, petroleum ether/ethyl acetate = 50/1, V/V).

**<sup>1</sup>H NMR** (400 MHz, CDCl<sub>3</sub>) δ 6.86–6.83 (m, 2H), 6.61–6.57 (m, 2H), 4.13–4.09 (m, 1H), 3.76 (s, 3H), 3.69 (s, 3H), 3.53–3.44 (m, 1H), 3.23–3.14 (m, 1H), 2.56–2.46 (m, 1H), 2.14–2.04 (m, 1H), 1.98–1.86 (m, 2H), 1.83–1.70 (m, 4H).

**<sup>13</sup>C NMR** (100 MHz, CDCl<sub>3</sub>) δ 177.3, 151.6, 142.6, 115.0, 114.1, 69.4, 60.1, 56.0, 52.3, 49.5, 37.2, 34.8, 33.5, 25.1.

**HRMS (ESI) *m/z***: Calcd for C<sub>16</sub>H<sub>22</sub>NO<sub>3</sub><sup>+</sup> [*M* + *H*]<sup>+</sup>: 276.1594; found: 276.1591.

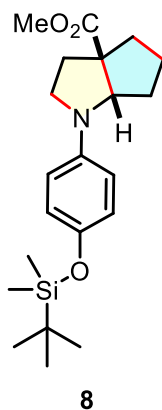

**Methyl 1-(4-((*tert*-butyldimethylsilyl)oxy)phenyl)hexahydrocyclopenta[*b*]pyrrole-3a(1*H*)-carboxylate**

34.6 mg, 46 % yield. Yellow oil (Flash column chromatography eluent, petroleum ether/ethyl acetate = 100/1, V/V).

**<sup>1</sup>H NMR** (400 MHz, CDCl<sub>3</sub>)  $\delta$  6.74 (d, *J* = 8.8 Hz, 2H), 6.50 (d, *J* = 8.8 Hz, 2H), 4.11 (d, *J* = 5.6 Hz, 1H), 3.69 (s, 3H), 3.51–3.44 (m, 1H), 3.24–3.13 (m, 1H), 2.56–2.46 (m, 1H), 2.14–2.04 (m, 1H), 1.95–1.86 (m, 2H), 1.84–1.71 (m, 4H), 0.97 (s, 9H), 0.15 (s, 6H).

**<sup>13</sup>C NMR** (100 MHz, CDCl<sub>3</sub>)  $\delta$  177.4, 146.9, 142.7, 120.6, 114.0, 69.3, 60.1, 52.3, 49.4, 37.3, 34.7, 33.5, 25.9, 25.1, 18.3, –4.32.

**HRMS (ESI) *m/z***: Calcd for C<sub>21</sub>H<sub>34</sub>NO<sub>3</sub>Si<sup>+</sup> [*M* + *H*]<sup>+</sup>: 376.2302; found: 376.2306.

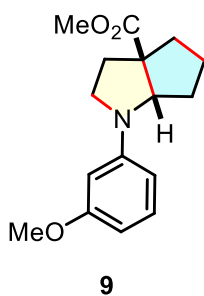

**Methyl 1-(3-methoxyphenyl)hexahydrocyclopenta[*b*]pyrrole-3a(1*H*)-carboxylate**

33 mg, 67 % yield. Yellow oil (Flash column chromatography eluent, petroleum ether/ethyl acetate = 50/1, V/V).

**<sup>1</sup>H NMR** (400 MHz, CDCl<sub>3</sub>) δ 7.16–7.09 (m, 1H), 6.32–6.22 (m, 2H), 6.18–6.14 (m, 1H), 4.21–4.19 (m, 1H), 3.80 (s, 3H), 3.69 (s, 3H), 3.54–3.47 (m, 1H), 3.34–3.25 (m, 1H), 2.55–2.47 (m, 1H), 2.17–2.06 (m, 1H), 2.00–1.91 (m, 2H), 1.88–1.70 (m, 4H).

**<sup>13</sup>C NMR** (100 MHz, CDCl<sub>3</sub>) δ 177.1, 160.7, 148.8, 129.9, 106.3, 101.4, 99.5, 68.7, 60.0, 55.2, 52.4, 48.9, 37.0, 34.4, 33.4, 25.1.

**HRMS (ESI) m/z**: Calcd for C<sub>16</sub>H<sub>22</sub>NO<sub>3</sub><sup>+</sup> [M + H]<sup>+</sup>: 276.1594; found: 276.1592.

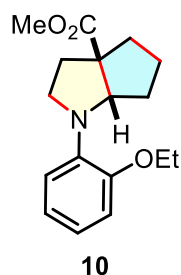

**Methyl 1-(*m*-tolyl)hexahydrocyclopenta[*b*]pyrrole-3a(1*H*)-carboxylate**

41.6 mg, 72 % yield. Yellow oil (Flash column chromatography eluent, petroleum ether/ethyl acetate = 100/1, V/V).

**<sup>1</sup>H NMR** (400 MHz, CDCl<sub>3</sub>) δ 6.89–6.82 (m, 3H), 6.76 (d, *J* = 7.2 Hz, 1H), 4.83–4.78 (m, 1H), 4.10–4.00 (m, 2H), 3.73 (s, 3H), 3.57–3.50 (m, 1H), 3.21–3.15 (m, 1H), 2.51–2.42 (m, 1H), 2.27–2.19 (m, 1H), 1.94–1.88 (m, 1H), 1.71–1.61 (m, 3H), 1.56–1.47 (m, 2H), 1.45 (t, *J* = 7.2 Hz, 3H).

**<sup>13</sup>C NMR** (100 MHz, CDCl<sub>3</sub>) δ 177.7, 150.0, 137.7, 121.2, 120.2, 117.5, 113.0, 69.0, 64.0, 59.0, 52.2, 49.6, 38.1, 35.1, 32.0, 25.9, 15.1.

**HRMS (ESI) m/z**: Calcd for C<sub>17</sub>H<sub>24</sub>NO<sub>3</sub><sup>+</sup> [M + H]<sup>+</sup>: 290.1751; found: 290.1747.

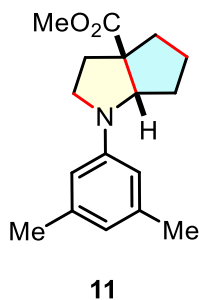

**Methyl-(3,5-dimethylphenyl)hexahydrocyclopenta[*b*]pyrrole-3a(1*H*)-carboxylate**

29 mg, 53 % yield. Yellow oil (Flash column chromatography eluent, petroleum ether/ethyl acetate = 100/1, V/V).

**<sup>1</sup>H NMR** (400 MHz, CDCl<sub>3</sub>)  $\delta$  6.40 (s, 1H), 6.27 (s, 2H), 4.25–4.13 (m, 1H), 3.69 (s, 3H), 3.56–3.47 (m, 1H), 3.34–3.22 (m, 1H), 2.56–2.46 (m, 1H), 2.29 (s, 6H), 2.17–2.07 (m, 1H), 2.01–1.91 (m, 2H), 1.89–1.68 (m, 4H).

**<sup>13</sup>C NMR** (100 MHz, CDCl<sub>3</sub>)  $\delta$  177.2, 147.6, 138.8, 118.5, 111.0, 68.7, 59.9, 52.3, 48.9, 37.0, 34.4, 33.6, 25.1, 21.9.

**HRMS (ESI) *m/z***: Calcd for C<sub>17</sub>H<sub>24</sub>NO<sub>2</sub><sup>+</sup> [M + H]<sup>+</sup>: 274.1802; found: 274.1799.

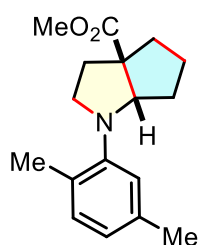

**12**

**Methyl-1-(2,5-dimethylphenyl)hexahydrocyclopenta[*b*]pyrrole-3a(1*H*)-carboxylate**

38.2 mg, 70 % yield. Yellow oil (Flash column chromatography eluent, petroleum ether/ethyl acetate = 100/1, V/V).

**<sup>1</sup>H NMR** (400 MHz, CDCl<sub>3</sub>)  $\delta$  7.02 (d, *J* = 7.6 Hz, 1H), 6.81 (s, 1H), 6.74 (d, *J* = 7.6 Hz, 1H), 4.37–4.32 (m, 1H), 3.76 (s, 3H), 3.44–3.35 (m, 1H), 2.99–2.90 (m, 1H), 2.50–2.42 (m, 1H), 2.30 (s, 3H), 2.24 (s, 3H), 2.21–2.15 (m, 1H), 1.91–1.84 (m, 1H), 1.78–1.71 (m, 1H), 1.71–1.62 (m, 2H), 1.57–1.46 (m, 2H).

**<sup>13</sup>C NMR** (100 MHz, CDCl<sub>3</sub>)  $\delta$  178.0, 146.9, 135.8, 131.2, 128.6, 122.7, 120.0, 69.5, 59.2, 52.3, 51.7, 38.3, 36.1, 31.8, 25.7, 21.4, 19.3.

**HRMS (ESI) *m/z***: Calcd for C<sub>17</sub>H<sub>24</sub>NO<sub>2</sub><sup>+</sup> [M + H]<sup>+</sup>: 274.1802; found: 274.1799.

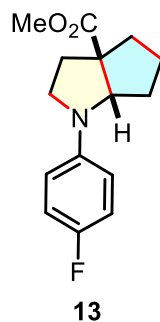

**Methyl 1-(4-fluorophenyl)hexahydrocyclopenta[*b*]pyrrole-3a(1*H*)-carboxylate**

28.6 mg, 56 % yield. Yellow oil (Flash column chromatography eluent, petroleum ether/ethyl acetate = 100/1, V/V).

**<sup>1</sup>H NMR** (400 MHz, CDCl<sub>3</sub>)  $\delta$  6.97–6.90 (m, 2H), 6.57–6.50 (m, 2H),  $\delta$  4.16–4.11 (m, 1H), 3.70 (s, 3H), 3.52–3.45 (m, 1H), 3.26–3.17 (m, 1H), 2.55–2.47 (m, 1H), 2.14–2.04 (m, 1H), 1.98–1.87 (m, 2H), 1.83–1.68 (m, 4H).

**<sup>13</sup>C NMR** (100 MHz, CDCl<sub>3</sub>)  $\delta$  177.16, 155.5 (d,  $J$  = 234.5 Hz), 144.3 (d,  $J$  = 1.5 Hz), 115.6 (d,  $J$  = 22.0 Hz), 113.7 (d,  $J$  = 7.2 Hz), 69.1, 60.1, 52.4, 49.4, 37.1, 34.7, 33.3, 25.1.

**<sup>19</sup>F NMR** (376 MHz, CDCl<sub>3</sub>)  $\delta$  –129.54 ~ –129.77 (m).

**HRMS (ESI) *m/z***: Calcd for C<sub>15</sub>H<sub>19</sub>FNO<sub>2</sub><sup>+</sup> [*M* + *H*]<sup>+</sup>: 264.1394; found: 264.1391.

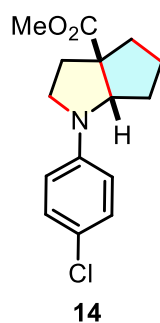

**Methyl 1-(4-chlorophenyl)hexahydrocyclopenta[*b*]pyrrole-3a(1*H*)-carboxylate**

48 mg, 85 % yield. Yellow oil (Flash column chromatography eluent, petroleum ether/ethyl acetate = 100/1, V/V).

**<sup>1</sup>H NMR** (400 MHz, CDCl<sub>3</sub>)  $\delta$  7.18–7.13 (m, 2H), 6.54–6.49 (m, 2H), 4.19–4.15 (m, 1H), 3.70 (s, 3H), 3.48–3.38 (m, 1H), 3.26 (q,  $J$  = 8.0 Hz, 1H), 2.55–2.46 (m, 1H), 2.16–2.07 (m, 1H), 2.00–1.91 (m, 2H), 1.83–1.69 (m, 4H).

$^{13}\text{C}$  NMR (100 MHz,  $\text{CDCl}_3$ )  $\delta$  177.0, 146.0, 128.9, 121.3, 114.1, 68.7, 60.1, 52.4, 48.9, 36.9, 34.5, 33.1, 25.1.

HRMS (ESI)  $m/z$ : Calcd for  $\text{C}_{15}\text{H}_{19}\text{ClNO}_2^+$   $[\text{M} + \text{H}]^+$ : 280.1099; found: 280.1096.

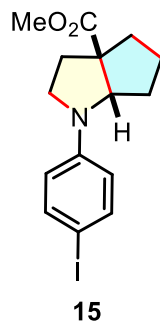

**Methyl 1-(4-iodophenyl)hexahydrocyclopenta[*b*]pyrrole-3a(1*H*)-carboxylate**

52 mg, 70 % yield. Yellow oil (Flash column chromatography eluent, petroleum ether/ethyl acetate = 100/1, V/V).

$^1\text{H}$  NMR (400 MHz,  $\text{CDCl}_3$ )  $\delta$  7.49–7.38 (m, 2H), 6.45–6.29 (m, 2H), 4.23–4.12 (m, 1H), 3.69 (s, 3H), 3.50–3.40 (m, 1H), 3.31–3.20 (m, 1H), 2.57–2.45 (m, 1H), 2.18–2.06 (m, 1H), 2.01–1.88 (m, 2H), 1.82–1.68 (m, 4H).

$^{13}\text{C}$  NMR (100 MHz,  $\text{CDCl}_3$ )  $\delta$  176.9, 146.8, 137.7, 115.3, 77.4, 68.5, 60.1, 52.4, 48.7, 36.9, 34.4, 33.1, 25.1.

HRMS (ESI)  $m/z$ : Calcd for  $\text{C}_{15}\text{H}_{19}\text{INO}_2^+$   $[\text{M} + \text{H}]^+$ : 372.0455; found: 372.0450.

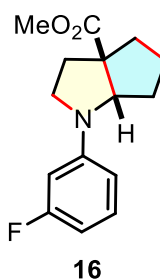

**Methyl 1-(3-fluorophenyl)hexahydrocyclopenta[*b*]pyrrole-3a(1*H*)-carboxylate**

32.8 mg, 62 % yield. Yellow oil (Flash column chromatography eluent, petroleum ether/ethyl acetate = 100/1, V/V).



**<sup>1</sup>H NMR** (400 MHz, CDCl<sub>3</sub>)  $\delta$  7.19–7.09 (m, 1H), 6.42–6.33 (m, 2H), 6.31–6.25 (m, 1H), 4.23–4.16 (m, 1H), 3.70 (s, 3H), 3.52–3.45 (m, 1H), 3.33–3.26 (m, 1H), 2.55–2.45 (m, 1H), 2.18–2.05 (m, 1H), 2.01–1.89 (m, 2H), 1.87–1.68 (m, 4H).

**<sup>13</sup>C NMR** (100 MHz, CDCl<sub>3</sub>)  $\delta$  176.9, 164.1 (d,  $J$  = 242.0 Hz), 149.0 (d,  $J$  = 10.8 Hz), 130.2 (d,  $J$  = 10.3 Hz), 108.7 (d,  $J$  = 2.2 Hz), 102.9 (d,  $J$  = 21.6 Hz), 110.0 (d,  $J$  = 25.7 Hz), 68.6, 60.1, 52.4, 48.8, 36.9, 34.4, 33.2, 25.1.

**<sup>19</sup>F NMR** (376 MHz, CDCl<sub>3</sub>)  $\delta$  –112.73 (s).

**HRMS (ESI)  $m/z$** : Calcd for C<sub>15</sub>H<sub>19</sub>FNO<sub>2</sub><sup>+</sup> [ $M + H$ ]<sup>+</sup>: 264.1394; found: 264.1391.

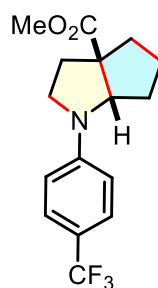

**17**

**Methyl 1-(4-(trifluoromethyl)phenyl)hexahydrocyclopenta[*b*]pyrrole-3a(1*H*)-carboxylate**

42 mg, 67 % yield. Yellow oil (Flash column chromatography eluent, petroleum ether/ethyl acetate = 100/1, V/V).

**<sup>1</sup>H NMR** (400 MHz, CDCl<sub>3</sub>)  $\delta$  7.44 (d,  $J$  = 8.8 Hz, 2H), 6.59 (d,  $J$  = 8.8 Hz, 2H),  $\delta$  4.29–4.26 (m, 1H), 3.71 (s, 3H), 3.56–3.49 (m, 1H), 3.41–3.33 (m, 1H), 2.57–2.49 (m, 1H), 2.18–2.10 (m, 1H), 2.05–1.96 (m, 2H), 1.85–1.68 (m, 4H).

**<sup>13</sup>C NMR** (100 MHz, CDCl<sub>3</sub>)  $\delta$  176.8, 149.2, 125.3 (q,  $J$  = 270.0 Hz), 126.4 (q,  $J$  = 3.8 Hz), 117.8 (q,  $J$  = 32.7 Hz), 112.2, 68.3, 60.1, 52.5, 48.6, 36.8, 34.3, 33.0, 25.1.

**<sup>19</sup>F NMR** (376 MHz, CDCl<sub>3</sub>)  $\delta$  –60.79 (s).

**HRMS (ESI)  $m/z$** : Calcd for C<sub>16</sub>H<sub>19</sub>F<sub>3</sub>NO<sub>2</sub><sup>+</sup> [ $M + H$ ]<sup>+</sup>: 314.1362; found: 314.1357.

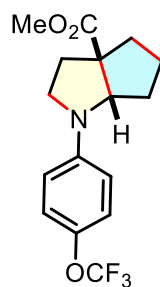

**18**

**Methyl 1-(4-(trifluoromethoxy)phenyl)hexahydrocyclopenta[*b*]pyrrole-3a(1*H*)-carboxylate**

53.4 mg, 81 % yield. Yellow oil (Flash column chromatography eluent, petroleum ether/ethyl acetate = 100/1, V/V).

**<sup>1</sup>H NMR** (400 MHz, CDCl<sub>3</sub>)  $\delta$  7.08 (d, *J* = 8.8 Hz, 2H), 6.54 (d, *J* = 9.2 Hz, 2H),  $\delta$  4.21 – 4.17 (m, 1H), 3.70 (s, 3H), 3.54–3.47 (m, 1H), 3.33–3.24 (m, 1H), 2.55–2.47 (m, 1H), 2.17–2.07 (m, 1H), 2.02–1.92 (m, 2H), 1.86–1.70 (m, 4H).

**<sup>13</sup>C NMR** (100 MHz, CDCl<sub>3</sub>)  $\delta$  177.0, 146.2, 140 (q, *J* = 3.8, 1.9 Hz), 122.3, 113.2, 68.8, 60.2, 52.4, 49.0, 36.9, 34.5, 33.2, 25.1.

**<sup>19</sup>F NMR** (376 MHz, CDCl<sub>3</sub>)  $\delta$  –58.46 (s).

**HRMS (ESI) *m/z***: Calcd for C<sub>16</sub>H<sub>19</sub>F<sub>3</sub>NO<sub>3</sub><sup>+</sup> [*M* + *H*]<sup>+</sup>: 330.1312; found: 330.1308.

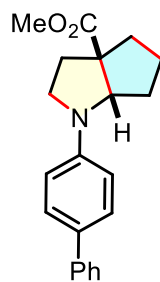

**19**

**Methyl 1-([1,1'-biphenyl]-4-yl)hexahydrocyclopenta[*b*]pyrrole-3a(1*H*)-carboxylate**

46.2 mg, 72 % yield. Yellow oil (Flash column chromatography eluent, petroleum ether/ethyl acetate = 100/1, V/V).

**<sup>1</sup>H NMR** (400 MHz, CDCl<sub>3</sub>)  $\delta$  7.57–7.52 (m, 2H), 7.51–7.46 (m, 2H), 7.38 (t, *J* = 7.6 Hz, 2H), 7.27–7.22 (m, 1H), 6.71–6.64 (m, 2H), 4.28–4.22 (m, 1H), 3.69 (s, 3H), 3.59–

3.52 (m, 1H), 3.37–3.30 (m, 1H), 2.56–2.48 (m, 1H), 2.17–2.08 (m, 1H), 2.02–1.93 (m, 2H), 1.91–1.71 (m, 4H).

$^{13}\text{C}$  NMR (100 MHz,  $\text{CDCl}_3$ )  $\delta$  177.1, 146.8, 141.4, 129.3, 128.8, 127.8, 126.4, 126.1, 113.3, 68.7, 60.1, 52.4, 48.8, 37.0, 34.5, 33.4, 25.1.

HRMS (ESI)  $m/z$ : Calcd for  $\text{C}_{21}\text{H}_{24}\text{NO}_2^+ [\text{M} + \text{H}]^+$ : 322.1802; found: 322.1801.

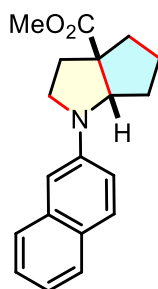

20

**Methyl 1-(naphthalen-2-yl)hexahydrocyclopenta[*b*]pyrrole-3a(1*H*)-carboxylate**

32.4 mg, 55 % yield. Yellow oil (Flash column chromatography eluent, petroleum ether/ethyl acetate = 100/1, V/V).

$^1\text{H}$  NMR (400 MHz,  $\text{CDCl}_3$ )  $\delta$  7.75–7.68 (m, 2H), 7.66 (d,  $J$  = 8.4 Hz, 1H), 7.38 (t,  $J$  = 7.2 Hz, 1H), 7.21 (t,  $J$  = 7.6 Hz, 1H), 7.11–7.00 (m, 1H), 6.83 (d,  $J$  = 2.0 Hz, 1H), 4.46–4.36 (m, 1H), 3.73 (s, 3H), 3.68–3.61 (m, 1H), 3.49–3.40 (m, 1H), 2.64–2.53 (m, 1H), 2.23–2.14 (m, 1H), 2.10–2.00 (m, 2H), 1.94–1.73 (m, 4H).

$^{13}\text{C}$  NMR (100 MHz,  $\text{CDCl}_3$ )  $\delta$  177.1, 145.2, 135.1, 128.8, 127.6, 126.8, 126.3, 126.1, 121.9, 116.6, 106.7, 68.7, 60.0, 52.4, 48.9, 37.1, 34.6, 33.5, 25.2.

HRMS (ESI)  $m/z$ : Calcd for  $\text{C}_{19}\text{H}_{22}\text{NO}_2^+ [\text{M} + \text{H}]^+$ : 296.1645; found: 296.1643.

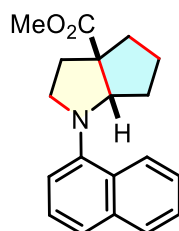

21

**Methyl 1-(naphthalen-1-yl)hexahydrocyclopenta[*b*]pyrrole-3a(1*H*)-carboxylate**

20.8 mg, 35 % yield. Yellow oil (Flash column chromatography eluent, petroleum ether/ethyl acetate = 200/1, V/V).

**<sup>1</sup>H NMR** (400 MHz, CDCl<sub>3</sub>)  $\delta$  8.23–8.19 (m, 1H), 7.83–7.80 (m, 1H), 7.53 (d,  $J$  = 8.4 Hz, 1H), 7.48–7.45 (m, 2H), 7.39 (t,  $J$  = 8.0 Hz, 1H), 7.14 (d,  $J$  = 7.2 Hz, 1H), 4.53–4.49 (m, 1H), 3.79 (s, 3H), 3.69–3.63 (m, 1H), 3.04–2.97 (m, 1H), 2.62–2.55 (m, 1H), 2.24–2.16 (m, 1H), 2.04–1.97 (m, 1H), 1.88–1.80 (m, 2H), 1.71–1.65 (m, 1H), 1.55–1.49 (m, 2H).

**<sup>13</sup>C NMR** (100 MHz, CDCl<sub>3</sub>)  $\delta$  178.0, 145.6, 134.9, 130.0, 128.3, 125.9, 125.8, 125.2, 124.3, 123.1, 115.7, 70.6, 59.2, 53.7, 52.4, 38.5, 36.7, 31.5, 25.7.

**HRMS (ESI)  $m/z$** : Calcd for C<sub>19</sub>H<sub>22</sub>NO<sub>2</sub><sup>+</sup> [ $M + H$ ]<sup>+</sup>: 296.1645; found: 296.1642.

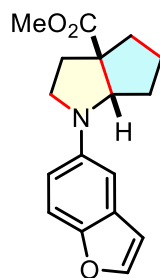

**22**

**Methyl 1-(benzofuran-5-yl)hexahydrocyclopenta[*b*]pyrrole-3a(1*H*)-carboxylate**

48.5 mg, 85 % yield. Yellow oil (Flash column chromatography eluent, petroleum ether/ethyl acetate = 100/1, V/V).

**<sup>1</sup>H NMR** (400 MHz, CDCl<sub>3</sub>)  $\delta$  7.54 (d,  $J$  = 2.0 Hz, 1H), 7.37 (d,  $J$  = 8.8 Hz, 1H), 6.76 (d,  $J$  = 2.4 Hz, 1H), 6.71–6.64 (m, 2H), 4.25–4.20 (m, 1H), 3.70 (s, 3H), 3.60–3.53 (m, 1H), 3.33–3.23 (m, 1H), 2.59–2.50 (m, 1H), 2.17–2.09 (m, 1H), 2.02–1.93 (m, 2H), 1.88–1.72 (m, 4H).

**<sup>13</sup>C NMR** (100 MHz, CDCl<sub>3</sub>)  $\delta$  177.3, 148.5, 145.3, 144.3, 128.3, 111.7, 111.5, 106.5, 103.7, 69.5, 60.0, 52.3, 49.7, 37.2, 34.7, 33.5, 25.1.

**HRMS (ESI)  $m/z$** : Calcd for C<sub>17</sub>H<sub>20</sub>NO<sub>3</sub><sup>+</sup> [ $M + H$ ]<sup>+</sup>: 286.1438; found: 286.1435.

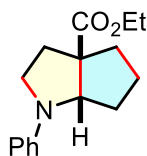

23

**Ethyl 1-phenylhexahydrocyclopenta[*b*]pyrrole-3a(1*H*)-carboxylate**

41 mg, 79 % yield. Yellow oil (Flash column chromatography eluent, petroleum ether/ethyl acetate = 100/1, V/V).

**<sup>1</sup>H NMR** (400 MHz, CDCl<sub>3</sub>)  $\delta$  7.26 – 7.21 (m, 2H), 6.63 (t,  $J$  = 7.2 Hz, 1H), 6.55 (d,  $J$  = 8.0 Hz, 2H), 4.15–4.12 (m, 1H), 4.07 (q,  $J$  = 7.2 Hz, 2H), 3.48–3.41 (m, 1H), 3.25–3.18 (m, 1H), 2.48–2.41 (m, 1H), 2.08–2.00 (m, 1H), 1.92–1.84 (m, 2H), 1.78–1.62 (m, 4H), 1.17 (t,  $J$  = 7.2 Hz, 3H).

**<sup>13</sup>C NMR** (100 MHz, CDCl<sub>3</sub>)  $\delta$  176.7, 147.5, 129.2, 116.4, 113.1, 68.6, 61.0, 60.1, 48.8, 37.1, 34.5, 33.4, 25.1, 14.3.

**HRMS (ESI)  $m/z$ :** Calcd for C<sub>16</sub>H<sub>22</sub>NO<sub>2</sub><sup>+</sup> [ $M + H$ ]<sup>+</sup>: 260.1645; found: 260.1643.

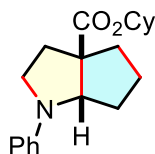

24

**Cyclohexyl 1-phenylhexahydrocyclopenta[*b*]pyrrole-3a(1*H*)-carboxylate**

52 mg, 83% yield. Yellow oil (Flash column chromatography eluent, petroleum ether/ethyl acetate = 100/1, V/V).

**<sup>1</sup>H NMR** (400 MHz, CDCl<sub>3</sub>)  $\delta$  7.22 (t,  $J$  = 8.0 Hz, 2H), 6.70 (t,  $J$  = 7.2 Hz, 1H), 6.61 (d,  $J$  = 8.0 Hz, 2H), 4.82–4.73 (m, 1H), 4.22–4.16 (m, 1H), 3.54–3.48 (m, 1H), 3.33–3.26 (m, 1H), 2.54–2.45 (m, 1H), 2.16–2.08 (m, 1H), 1.99–1.91 (m, 2H), 1.85–1.75 (m, 5H), 1.72–1.58 (m, 4H), 1.47–1.30 (m, 5H).

**<sup>13</sup>C NMR** (100 MHz, CDCl<sub>3</sub>)  $\delta$  176.1, 147.5, 129.2, 116.3, 113.0, 72.7, 68.6, 60.2, 48.8, 37.1, 34.5, 33.4, 31.45, 31.40, 25.5, 25.2, 23.6, 23.5.

**HRMS (ESI)  $m/z$ :** Calcd for C<sub>20</sub>H<sub>28</sub>NO<sub>2</sub><sup>+</sup> [ $M + H$ ]<sup>+</sup>: 314.2115; found: 314.2110.

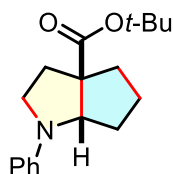

**25**

***tert*-Butyl 1-phenylhexahydrocyclopenta[*b*]pyrrole-3a(1*H*)-carboxylate**

37 mg, 64% yield. Yellow oil (Flash column chromatography eluent, petroleum ether/ethyl acetate = 100/1, V/V).

**<sup>1</sup>H NMR** (400 MHz, CDCl<sub>3</sub>)  $\delta$  7.26–7.20 (m, 2H), 6.70 (t, *J* = 7.2 Hz, 1H), 6.61 (d, *J* = 8.0 Hz, 2H), 4.23–4.17 (m, 1H), 4.08 (t, *J* = 6.8 Hz, 2H), 3.54–3.47 (m, 1H), 3.32–3.23 (m, 1H), 2.55–2.46 (m, 1H), 2.16–2.07 (m, 1H), 2.00–1.91 (m, 2H), 1.86–1.69 (m, 4H), 1.61–1.56 (m, 2H), 1.39–1.32 (m, 2H), 0.91 (t, *J* = 7.6 Hz, 3H).

**<sup>13</sup>C NMR** (100 MHz, CDCl<sub>3</sub>)  $\delta$  176.7, 147.5, 129.2, 116.4, 113.0, 68.7, 64.9, 60.1, 48.8, 37.0, 34.4, 33.4, 30.8, 25.2, 19.3, 13.8.

**HRMS (ESI) *m/z***: Calcd for C<sub>18</sub>H<sub>26</sub>NO<sub>2</sub><sup>+</sup> [*M* + *H*]<sup>+</sup>: 288.1958; found: 288.1954.

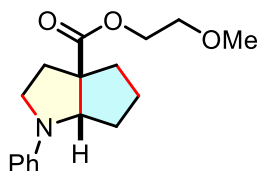

**26**

**2-Methoxyethyl 1-phenylhexahydrocyclopenta[*b*]pyrrole-3a(1*H*)-carboxylate**

46.9 mg, 81% yield. Yellow oil (Flash column chromatography eluent, petroleum ether/ethyl acetate = 100/1, V/V).

**<sup>1</sup>H NMR** (400 MHz, CDCl<sub>3</sub>)  $\delta$  7.22 (t, *J* = 8.4, 7.5 Hz, 2H), 6.70 (t, *J* = 7.2 Hz, 1H), 6.61 (d, *J* = 8.0 Hz, 2H), 4.28–4.17 (m, 3H), 3.60–3.54 (m, 2H), 3.54–3.48 (m, 1H), 3.33 (s, 3H), 3.31–3.26 (m, 1H), 2.58–2.47 (m, 1H), 2.19–2.09 (m, 1H), 2.02–1.91 (m, 2H), 1.87–1.69 (m, 4H).

**<sup>13</sup>C NMR** (100 MHz, CDCl<sub>3</sub>)  $\delta$  176.6, 147.4, 129.2, 116.4, 113.0, 70.5, 68.6, 63.9, 60.1, 59.0, 48.8, 36.9, 34.4, 33.3, 25.1.

**HRMS (ESI)  $m/z$ :** Calcd for  $C_{17}H_{24}NO_3^+$   $[M + H]^+$ : 290.1751; found: 290.1747.

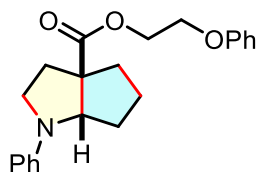

**27**

**2-Phenoxyethyl 1-phenylhexahydrocyclopenta[b]pyrrole-3a(1H)-carboxylate**

52 mg, 74% yield. Yellow oil (Flash column chromatography eluent, petroleum ether/ethyl acetate = 100/1, V/V).

**$^1H$  NMR** (400 MHz,  $CDCl_3$ )  $\delta$  7.29–7.18 (m, 4H), 6.95 (t,  $J$  = 7.2 Hz, 1H), 6.86 (d,  $J$  = 8.0 Hz, 2H), 6.70 (t,  $J$  = 7.2 Hz, 1H), 6.59 (d,  $J$  = 8.0 Hz, 2H), 4.47–4.39 (m, 2H), 4.24–4.19 (m, 1H), 4.15 (t,  $J$  = 4.8 Hz, 2H), 3.53–3.45 (m, 1H), 3.33–3.25 (m, 1H), 2.56–2.46 (m, 1H), 2.17–2.08 (m, 1H), 1.98–1.88 (m, 2H), 1.83–1.66 (m, 4H).

**$^{13}C$  NMR** (100 MHz,  $CDCl_3$ )  $\delta$  176.6, 158.6, 147.4, 129.6, 129.2, 121.3, 116.5, 114.8, 113.1, 68.7, 65.9, 63.3, 60.1, 48.8, 36.9, 34.4, 33.4, 25.1.

**HRMS (ESI)  $m/z$ :** Calcd for  $C_{22}H_{26}NO_3^+$   $[M + H]^+$ : 352.1907; found: 352.1906.

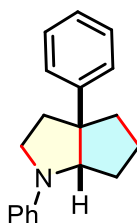

**28**

**1,3a-Diphenyloctahydrocyclopenta[b]pyrrole**

38.5 mg, 73 % yield. Colorless oil (Flash column chromatography eluent, petroleum ether/ethyl acetate = 100/1, V/V).

**$^1H$  NMR** (400 MHz,  $CDCl_3$ )  $\delta$  7.30–7.23 (m, 4H), 7.22–7.13 (m, 3H), 6.71 (t,  $J$  = 7.2 Hz, 1H), 6.64 (d,  $J$  = 8.0 Hz, 2H), 4.20 (d,  $J$  = 7.6 Hz, 1H), 3.55–3.48 (m, 1H), 3.33–3.24 (m, 1H), 2.31–2.20 (m, 2H), 2.08–2.00 (m, 2H), 1.96–1.80 (m, 4H).

$^{13}\text{C}$  NMR (100 MHz,  $\text{CDCl}_3$ )  $\delta$  149.1, 147.2, 129.3, 128.5, 126.1, 126.0, 115.9, 112.6, 69.9, 58.6, 47.6, 38.8, 38.6, 33.2, 24.2.

HRMS (ESI)  $m/z$ : Calcd for  $\text{C}_{19}\text{H}_{22}\text{N}^+$   $[\text{M} + \text{H}]^+$ : 264.1747; found: 264.1745.

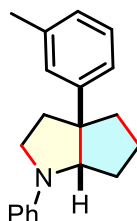

29

### 1-Phenyl-3a-(*m*-tolyl)octahydrocyclopenta[*b*]pyrrole

38.8 mg, 70% yield. Colorless oil (Flash column chromatography eluent, petroleum ether/ethyl acetate = 100/1, V/V).

$^1\text{H}$  NMR (400 MHz,  $\text{CDCl}_3$ )  $\delta$  7.28–7.24 (m, 2H), 7.16 (t,  $J = 7.6$  Hz, 1H), 7.06 (s, 1H), 7.02–6.97 (m, 2H), 6.71 (t,  $J = 7.2$  Hz, 1H), 6.64 (d,  $J = 8.0$  Hz, 2H), 4.22–4.18 (m, 1H), 3.54–3.48 (m, 1H), 3.35–3.26 (m, 1H), 2.32 (s, 3H), 2.27–2.15 (m, 2H), 2.09–1.99 (m, 2H), 1.93–1.76 (m, 4H).

$^{13}\text{C}$  NMR (100 MHz,  $\text{CDCl}_3$ )  $\delta$  149.1, 147.2, 138.0, 129.3, 128.3, 126.83, 126.79, 123.2, 115.8, 112.6, 69.8, 58.5, 47.7, 38.9, 38.8, 33.2, 24.3, 21.8.

HRMS (ESI)  $m/z$ : Calcd for  $\text{C}_{20}\text{H}_{24}\text{N}^+$   $[\text{M} + \text{H}]^+$ : 278.1903; found: 278.1902.

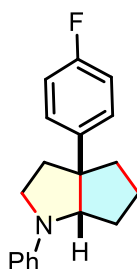

30

### 3a-(4-Fluorophenyl)-1-phenyloctahydrocyclopenta[*b*]pyrrole

50.1 mg, 89% yield. Colorless oil (Flash column chromatography eluent, petroleum ether/ethyl acetate = 100/1, V/V).



**<sup>1</sup>H NMR** (400 MHz, CDCl<sub>3</sub>)  $\delta$  7.29–7.24 (m, 2H), 7.18–7.13 (m, 2H), 6.95 (t,  $J$  = 12.0, 5.4 Hz, 2H), 6.72 (t,  $J$  = 7.2 Hz, 1H), 6.64 (d,  $J$  = 8.0 Hz, 2H), 4.15 (d,  $J$  = 8.8 Hz, 1H), 3.55–3.49 (m, 1H), 3.30–3.23 (m, 1H), 2.31–2.19 (m, 2H), 2.05–1.96 (m, 2H), 1.91–1.79 (m, 4H).

**<sup>13</sup>C NMR** (100 MHz, CDCl<sub>3</sub>)  $\delta$  162.4 (d,  $J$  = 244.2 Hz), 147.1, 144.8 (d,  $J$  = 3.2 Hz), 129.3, 127.6 (d,  $J$  = 7.5 Hz), 116.0, 115.2 (d,  $J$  = 20.9 Hz), 112.6, 70.0, 58.1, 47.5, 38.8, 38.7, 33.1, 24.1.

**<sup>19</sup>F NMR** (376 MHz, CDCl<sub>3</sub>)  $\delta$  –116.77 ~ –119.14 (m).

**HRMS (ESI) m/z**: Calcd for C<sub>19</sub>H<sub>21</sub>N<sup>+</sup> [M + H]<sup>+</sup>: 282.1653; found: 282.1652.

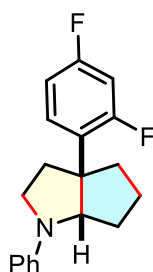

**31**

**3a-(2,4-Difluorophenyl)-1-phenyloctahydrocyclopenta[b]pyrrole**

34.1 mg, 57% yield. Yellow oil (Flash column chromatography eluent, petroleum ether/ethyl acetate = 100/1, V/V).

**<sup>1</sup>H NMR** (400 MHz, CDCl<sub>3</sub>)  $\delta$  7.29–7.22 (m, 2H), 7.08–7.00 (m, 1H), 6.82–6.76 (m, 1H), 6.75–6.67 (m, 2H), 6.62 (d,  $J$  = 8.0 Hz, 2H), 4.32–4.23 (m, 1H), 3.55–3.46 (m, 1H), 3.21–3.12 (m, 1H), 2.40–2.25 (m, 2H), 2.19–2.05 (m, 2H), 1.95–1.76 (m, 4H).

**<sup>13</sup>C NMR** (100 MHz, CDCl<sub>3</sub>)  $\delta$  162.6 (dd,  $J$  = 53.6, 11.9 Hz), 160.1 (dd,  $J$  = 56.0, 11.9 Hz), 147.1, 130.4 (dd,  $J$  = 13.2, 3.9 Hz), 129.3, 128.3 (dd,  $J$  = 9.2, 7.0 Hz), 116.0, 112.4, 110.5 (dd,  $J$  = 20.4, 3.5 Hz), 104.8 (dd,  $J$  = 27.3, 25.0 Hz), 68.6, 55.9 (d,  $J$  = 2.7 Hz), 47.6, 37.8 (d,  $J$  = 4.8 Hz), 36.8, 32.4, 24.3.

**<sup>19</sup>F NMR** (376 MHz, CDCl<sub>3</sub>)  $\delta$  –106.04 ~ –106.16 (m), –113.57 ~ –113.69 (m).

**HRMS (ESI) m/z**: Calcd for C<sub>19</sub>H<sub>20</sub>F<sub>2</sub>N<sup>+</sup> [M + H]<sup>+</sup>: 300.1558; found: 300.1555.

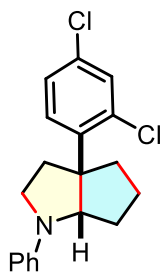

**32**

**3a-(2,4-Dichlorophenyl)-1-phenyloctahydrocyclopenta[b]pyrrole**

29.9 mg, 45% yield. Yellow oil (Flash column chromatography eluent, petroleum ether/ethyl acetate = 100/1, V/V).

**<sup>1</sup>H NMR** (400 MHz, CDCl<sub>3</sub>)  $\delta$  7.40 (d,  $J$  = 2.4 Hz, 1H), 7.28–7.24 (m, 2H), 7.08 (dd,  $J$  = 8.4, 2.4 Hz, 1H), 7.00 (d,  $J$  = 8.8 Hz, 1H), 6.70 (t,  $J$  = 7.2 Hz, 1H), 6.62 (d,  $J$  = 8.0 Hz, 2H), 4.41–4.36 (m, 1H), 3.49–3.43 (m, 1H), 3.13–3.06 (m, 1H), 2.57–2.48 (m, 1H), 2.45–2.33 (m, 2H), 2.27–2.18 (m, 1H), 2.05–1.98 (m, 1H), 1.95–1.86 (m, 1H), 1.77–1.68 (m, 2H).

**<sup>13</sup>C NMR** (100 MHz, CDCl<sub>3</sub>)  $\delta$  146.8, 142.6, 134.6, 132.7, 131.3, 129.4, 128.8, 126.8, 115.9, 112.1, 68.5, 58.2, 47.6, 37.1, 36.3, 31.9, 24.5.

**HRMS (ESI)  $m/z$** : Calcd for C<sub>19</sub>H<sub>20</sub>Cl<sub>2</sub>N<sup>+</sup> [ $M + H$ ]<sup>+</sup>: 332.0967; found: 332.0963.

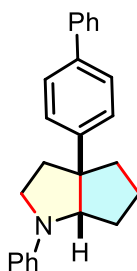

**33**

**3a-([1,1'-Biphenyl]-4-yl)-1-phenyloctahydrocyclopenta[b]pyrrole**

53 mg, 78% yield. White solid, melting point: 138.1–138.9 °C (Flash column chromatography eluent, petroleum ether/ethyl acetate = 100/1, V/V).

**<sup>1</sup>H NMR** (400 MHz, CDCl<sub>3</sub>)  $\delta$  7.55 (d,  $J$  = 7.6 Hz, 2H), 7.50 (d,  $J$  = 8.0 Hz, 2H), 7.41 (t,  $J$  = 7.6 Hz, 2H), 7.35–7.30 (m, 1H), 7.27 (t,  $J$  = 7.2 Hz, 4H), 6.72 (t,  $J$  = 7.2 Hz, 1H),

6.66 (d,  $J = 8.0$  Hz, 2H), 4.23 (d,  $J = 7.6$  Hz, 1H), 3.62–3.48 (m, 1H), 3.36–3.25 (m, 1H), 2.35–2.21 (m, 2H), 2.14–1.95 (m, 3H), 1.91–1.76 (m, 3H).

$^{13}\text{C}$  NMR (100 MHz,  $\text{CDCl}_3$ )  $\delta$  148.2, 147.2, 140.9, 139.0, 129.3, 128.9, 127.24, 127.15, 127.1, 126.5, 116.0, 112.6, 70.0, 58.4, 47.7, 38.8, 38.7, 33.2, 24.2.

HRMS (ESI)  $m/z$ : Calcd for  $\text{C}_{25}\text{H}_{26}\text{N}^+$   $[\text{M} + \text{H}]^+$ : 340.2060; found: 340.2056.

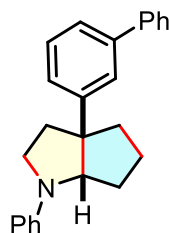

**34**

**3a-([1,1'-Biphenyl]-3-yl)-1-phenyloctahydrocyclopenta[b]pyrrole**

46.2 mg, 68% yield. Yellow oil (Flash column chromatography eluent, petroleum ether/ethyl acetate = 100/1, V/V).

$^1\text{H}$  NMR (400 MHz,  $\text{CDCl}_3$ )  $\delta$  7.54 (d,  $J = 7.6$  Hz, 2H), 7.47 (s, 1H), 7.44–7.38 (m, 3H), 7.35–7.30 (m, 2H), 7.28–7.22 (m, 2H), 7.16 (d,  $J = 7.6$  Hz, 1H), 6.71 (t,  $J = 7.2$  Hz, 1H), 6.65 (d,  $J = 8.0$  Hz, 2H), 4.31–4.23 (m, 1H), 3.57–3.49 (m, 1H), 3.38–3.29 (m, 1H), 2.36–2.28 (m, 1H), 2.28–2.22 (m, 1H), 2.16–2.10 (m, 1H), 2.08–1.96 (m, 2H), 1.92–1.80 (m, 3H).

$^{13}\text{C}$  NMR (100 MHz,  $\text{CDCl}_3$ )  $\delta$  149.5, 147.2, 141.6, 141.5, 129.3, 128.9, 128.8, 127.4, 125.1, 125.04, 125.00, 116.0, 112.7, 70.0, 58.7, 47.7, 38.9, 38.8, 33.2, 24.3.

HRMS (ESI)  $m/z$ : Calcd for  $\text{C}_{25}\text{H}_{26}\text{N}^+$   $[\text{M} + \text{H}]^+$ : 340.2060; found: 340.2056.

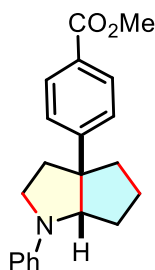

**35**

**Methyl 4-(1-phenylhexahydrocyclopenta[*b*]pyrrol-3a(1*H*)-yl)benzoate**

56.7 mg, 88% yield. White solid, melting point: 109.9–111.1 °C (Flash column chromatography eluent, petroleum ether/ethyl acetate = 100/1, V/V).

<sup>1</sup>H NMR (400 MHz, CDCl<sub>3</sub>) δ 7.94 (d, *J* = 7.6 Hz, 2H), 7.27 (d, *J* = 6.4 Hz, 4H), 6.80–6.70 (m, 1H), 6.67 (t, *J* = 14.8 Hz, 2H), 4.29–4.13 (m, 1H), 3.89 (s, 3H), 3.61–3.45 (m, 1H), 3.36–3.17 (m, 1H), 2.36–2.18 (m, 2H), 2.09–1.97 (m, 2H), 1.95–1.65 (m, 4H).

<sup>13</sup>C NMR (100 MHz, CDCl<sub>3</sub>) δ 167.1, 154.3, 147.0, 129.8, 129.3, 128.0, 126.1, 116.2, 112.7, 69.7, 58.8, 52.1, 47.6, 38.7, 38.6, 33.1, 24.1.

HRMS (ESI) *m/z*: Calcd for C<sub>21</sub>H<sub>24</sub>NO<sub>2</sub><sup>+</sup> [*M* + *H*]<sup>+</sup>: 322.1802; found: 322.1800.

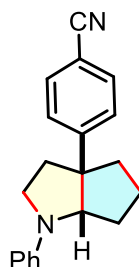

**36**

**4-(1-Phenylhexahydrocyclopenta[*b*]pyrrol-3a(1*H*)-yl)benzonitrile**

35.1 mg, 61% yield. White solid, melting point: 99.9 – 101.1 °C (Flash column chromatography eluent, petroleum ether/ethyl acetate = 100/1, V/V).

<sup>1</sup>H NMR (400 MHz, CDCl<sub>3</sub>) δ 7.56 (d, *J* = 8.4 Hz, 2H), 7.32–7.23 (m, 4H), 6.74 (t, *J* = 7.2 Hz, 1H), 6.64 (d, *J* = 8.0 Hz, 2H), 4.18 (d, *J* = 7.6 Hz, 1H), 3.61–3.49 (m, 1H), 3.35–3.22 (m, 1H), 2.35–2.20 (m, 2H), 2.08–1.98 (m, 2H), 1.93–1.81 (m, 4H).

<sup>13</sup>C NMR (100 MHz, CDCl<sub>3</sub>) δ 154.5, 146.8, 132.3, 129.4, 126.9, 119.0, 116.4, 112.7, 110.0, 69.8, 58.9, 47.5, 38.6, 38.3, 33.0, 24.0.

HRMS (ESI) *m/z*: Calcd for C<sub>20</sub>H<sub>21</sub>N<sub>2</sub><sup>+</sup> [*M* + *H*]<sup>+</sup>: 289.1699; found: 289.1696.

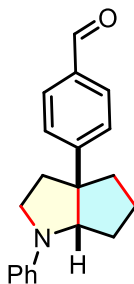

37

**4-(1-Phenylhexahydrocyclopenta[b]pyrrol-3a(1H)-yl)benzaldehyde**

25.1 mg, 43% yield. White solid, melting point: 101.2–104.5 °C (Flash column chromatography eluent, petroleum ether/ethyl acetate = 100/1, V/V).

**<sup>1</sup>H NMR** (400 MHz, CDCl<sub>3</sub>)  $\delta$  9.96 (s, 1H), 7.79 (d,  $J$  = 8.4 Hz, 2H), 7.37 (d,  $J$  = 8.4 Hz, 2H), 7.27 (dd,  $J$  = 13.6, 5.2 Hz, 2H), 6.74 (t,  $J$  = 7.2 Hz, 1H), 6.65 (d,  $J$  = 8.0 Hz, 2H), 4.23 (d,  $J$  = 8.4 Hz, 1H), 3.61–3.52 (m, 1H), 3.37–3.27 (m, 1H), 2.39–2.24 (m, 2H), 2.10–2.01 (m, 2H), 1.97–1.81 (m, 4H).

**<sup>13</sup>C NMR** (100 MHz, CDCl<sub>3</sub>)  $\delta$  192.0, 156.2, 146.9, 134.6, 130.1, 129.4, 126.8, 116.3, 112.7, 69.8, 59.0, 47.6, 38.7, 38.5, 33.1, 24.1.

**HRMS (ESI)  $m/z$ :** Calcd for C<sub>20</sub>H<sub>22</sub>NO<sup>+</sup> [ $M + H$ ]<sup>+</sup>: 292.1696; found: 292.1693.

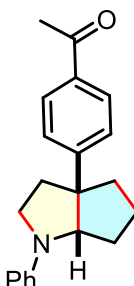

38

**1-(4-(1-Phenylhexahydrocyclopenta[b]pyrrol-3a(1H)-yl)phenyl)ethan-1-one**

38.4 mg, 63% yield. Yellow oil (Flash column chromatography eluent, petroleum ether/ethyl acetate = 100/1, V/V).

**<sup>1</sup>H NMR** (400 MHz, CDCl<sub>3</sub>)  $\delta$  7.96–7.70 (m, 2H), 7.33–7.09 (m, 4H), 6.82–6.69 (m, 1H), 6.71–6.56 (m, 2H), 4.31–4.12 (m, 1H), 3.63–3.47 (m, 1H), 3.34–3.18 (m, 1H), 2.56 (s, 3H), 2.35–2.19 (m, 2H), 2.10–1.98 (m, 2H), 1.97–1.75 (m, 4H).

$^{13}\text{C}$  NMR (100 MHz,  $\text{CDCl}_3$ )  $\delta$  197.8, 154.6, 146.9, 135.1, 129.3, 128.6, 126.3, 116.2, 112.6, 69.7, 58.8, 47.6, 38.6, 38.5, 33.1, 26.7, 24.1.

HRMS (ESI)  $m/z$ : Calcd for  $\text{C}_{21}\text{H}_{24}\text{NO}^+$   $[\text{M} + \text{H}]^+$ : 306.1852; found: 306.1850.

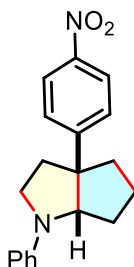

39

**1-(4-(1-Phenylhexahydrocyclopenta[*b*]pyrrol-3a(1*H*)-yl)phenyl)ethan-1-one**

20.3 mg, 33% yield. Yellow solid, melting point: 97.7–98.8 °C (Flash column chromatography eluent, petroleum ether/ethyl acetate = 100/1, V/V).

$^1\text{H}$  NMR (400 MHz,  $\text{CDCl}_3$ )  $\delta$  8.21–7.98 (m, 2H), 7.41–7.32 (m, 2H), 7.31–7.24 (m, 2H), 6.75 (t,  $J$  = 7.2 Hz, 1H), 6.65 (d,  $J$  = 8.0 Hz, 2H), 4.22 (d,  $J$  = 8.8 Hz, 1H), 3.62–3.51 (m, 1H), 3.35–3.25 (m, 1H), 2.41–2.23 (m, 2H), 2.10–1.99 (m, 2H), 1.98–1.82 (m, 4H).

$^{13}\text{C}$  NMR (100 MHz,  $\text{CDCl}_3$ )  $\delta$  156.7, 146.8, 146.3, 129.4, 127.0, 123.8, 116.5, 112.7, 69.8, 58.9, 47.5, 38.7, 38.5, 33.0, 24.1.

HRMS (ESI)  $m/z$ : Calcd for  $\text{C}_{19}\text{H}_{21}\text{N}_2\text{O}_2^+$   $[\text{M} + \text{H}]^+$ : 309.1598; found: 309.1593.

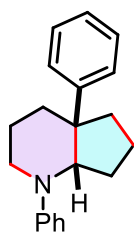

40

**1,4a-Diphenyloctahydro-1*H*-cyclopenta[*b*]pyridine**

25.0 mg, 45% yield. Yellow oil (Flash column chromatography eluent, petroleum ether/ethyl acetate = 100/1, V/V).

**$^1\text{H}$  NMR** (400 MHz,  $\text{CDCl}_3$ )  $\delta$  7.42 (d,  $J = 7.6$  Hz, 2H), 7.24–7.15 (m, 4H), 7.11–7.04 (m, 1H), 6.94 (d,  $J = 7.6$  Hz, 2H), 6.71 (t,  $J = 7.2$  Hz, 1H), 4.45 (d,  $J = 8.0$  Hz, 1H), 3.41 (d,  $J = 8.4$  Hz, 1H), 2.89–2.74 (m, 1H), 2.08–2.00 (m, 1H), 1.90–1.52 (m, 7H), 1.51–1.29 (m, 2H).

**$^{13}\text{C}$  NMR** (100 MHz,  $\text{CDCl}_3$ )  $\delta$  150.7, 149.3, 129.4, 128.0, 127.4, 125.6, 117.8, 114.6, 61.7, 46.2, 41.6, 39.4, 32.8, 21.8, 21.6, 18.8.

**HRMS (ESI)  $m/z$** : Calcd for  $\text{C}_{20}\text{H}_{24}\text{N}^+$   $[\text{M} + \text{H}]^+$ : 278.1903; found: 278.1901.

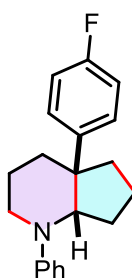

**41**

**4a-(4-Fluorophenyl)-1-phenyloctahydro-1H-cyclopenta[b]pyridine**

36.6 mg, 62% yield. Yellow oil (Flash column chromatography eluent, petroleum ether/ethyl acetate = 100/1, V/V).

**$^1\text{H}$  NMR** (400 MHz,  $\text{CDCl}_3$ )  $\delta$  7.41–7.33 (m, 2H), 7.24–7.15 (m, 2H), 6.93 (d,  $J = 8.4$  Hz, 2H), 6.87 (t,  $J = 8.4$  Hz, 2H), 6.72 (t,  $J = 7.2$  Hz, 1H), 4.40 (t,  $J = 8.8$  Hz, 1H), 3.41 (d,  $J = 11.6$  Hz, 1H), 2.88–2.76 (m, 1H), 2.06–1.98 (m, 1H), 1.80–1.67 (m, 4H), 1.58 (d,  $J = 13.2$  Hz, 2H), 1.53–1.43 (m, 2H), 1.40–1.32 (m, 1H).

**$^{13}\text{C}$  NMR** (100 MHz,  $\text{CDCl}_3$ )  $\delta$  160.9 (d,  $J = 243.6$  Hz), 150.7, 144.9 (d,  $J = 3.1$  Hz), 129.4, 128.9 (d,  $J = 7.5$  Hz), 118.0, 114.7, 114.6 (d,  $J = 20.7$  Hz), 62.0, 45.8, 41.6, 39.4, 32.8, 21.7, 21.4, 18.7.

**$^{19}\text{F}$  NMR** (376 MHz,  $\text{CDCl}_3$ )  $\delta$  –111.96 ~ –125.69 (m).

**HRMS (ESI)  $m/z$** : Calcd for  $\text{C}_{20}\text{H}_{23}\text{FN}^+$   $[\text{M} + \text{H}]^+$ : 296.1809; found: 296.1805.

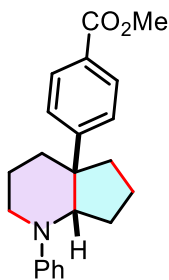

42

**Methyl 4-(1-phenyloctahydro-4aH-cyclopenta[b]pyridin-4a-yl)benzoate**

34.9 mg, 52% yield. White solid, melting point: 114.1–114.8 °C (Flash column chromatography eluent, petroleum ether/ethyl acetate = 100/1, V/V).

<sup>1</sup>H NMR (400 MHz, CDCl<sub>3</sub>) δ 7.95 (d, *J* = 8.4 Hz, 2H), 7.58 (d, *J* = 8.4 Hz, 2H), 7.30 (t, *J* = 8.0 Hz, 2H), 7.03 (d, *J* = 8.4 Hz, 2H), 6.82 (t, *J* = 7.2 Hz, 1H), 4.54 (t, *J* = 8.8 Hz, 1H), 3.90 (s, 3H), 3.50 (d, *J* = 11.6 Hz, 1H), 2.98–2.84 (m, 1H), 2.21–2.09 (m, 1H), 1.94–1.66 (m, 7H), 1.58 (s, 1H), 1.46–1.34 (m, 1H).

<sup>13</sup>C NMR (100 MHz, CDCl<sub>3</sub>) δ 167.3, 154.8, 150.6, 129.4, 129.3, 127.5, 118.1, 114.8, 61.8, 52.1, 46.6, 41.6, 39.0, 32.7, 21.8, 21.4, 18.7.

HRMS (ESI) *m/z*: Calcd for C<sub>22</sub>H<sub>26</sub>NO<sub>2</sub><sup>+</sup> [*M* + *H*]<sup>+</sup>: 336.1958; found: 336.1953.

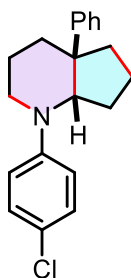

43

**1-(4-Chlorophenyl)-4a-phenyloctahydro-1H-cyclopenta[b]pyridine**

36.2 mg, 58% yield. Yellow oil (Flash column chromatography eluent, petroleum ether/ethyl acetate = 100/1, V/V).

<sup>1</sup>H NMR (400 MHz, CDCl<sub>3</sub>) δ 7.37 (d, *J* = 7.6 Hz, 2H), 7.20 (t, *J* = 7.6 Hz, 2H), 7.16–7.05 (m, 3H), 6.84 (d, *J* = 9.2 Hz, 2H), 4.38 (t, *J* = 8.8 Hz, 1H), 3.35 (d, *J* = 11.6 Hz,



1H), 2.86–2.73 (m, 1H), 2.09–1.97 (m, 1H), 1.82–1.55 (m, 7H), 1.47–1.43 (m, 1H), 1.42–1.32 (m, 1H).

<sup>13</sup>C NMR (100 MHz, CDCl<sub>3</sub>) δ 149.3, 149.0, 129.2, 128.1, 127.3, 125.7, 122.5, 115.8, 61.9, 46.3, 41.8, 39.3, 32.6, 21.7, 21.6, 18.7.

HRMS (ESI) *m/z*: Calcd for C<sub>20</sub>H<sub>23</sub>ClN<sup>+</sup> [M + H]<sup>+</sup>: 312.1514; found: 312.1509.

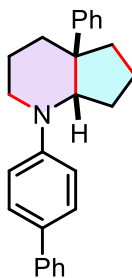

**44**

**1-([1,1'-Biphenyl]-4-yl)-4a-phenyloctahydro-1H-cyclopenta[b]pyridine**

48.8 mg, 69% yield. Yellow oil (Flash column chromatography eluent, petroleum ether/ethyl acetate = 100/1, V/V).

<sup>1</sup>H NMR (400 MHz, CDCl<sub>3</sub>) δ 7.65–7.57 (m, 4H), 7.53 (d, *J* = 7.2 Hz, 2H), 7.44 (t, *J* = 7.6 Hz, 2H), 7.32 (t, *J* = 7.6 Hz, 3H), 7.21 (t, *J* = 7.2 Hz, 1H), 7.12 (d, *J* = 8.8 Hz, 2H), 4.62 (t, *J* = 8.8 Hz, 1H), 3.61 (d, *J* = 11.2 Hz, 1H), 3.07–2.91 (m, 1H), 2.22–2.14 (m, 1H), 2.04–1.98 (m, 1H), 1.92–1.71 (m, 6H), 1.60–1.48 (m, 2H).

<sup>13</sup>C NMR (100 MHz, CDCl<sub>3</sub>) δ 149.9, 149.2, 141.2, 130.4, 128.8, 128.1, 128.0, 127.4, 126.5, 126.2, 125.7, 114.6, 61.5, 46.3, 41.7, 39.4, 32.8, 21.8, 21.7, 18.8.

HRMS (ESI) *m/z*: Calcd for C<sub>26</sub>H<sub>28</sub>N<sup>+</sup> [M + H]<sup>+</sup>: 354.2216; found: 354.2212.

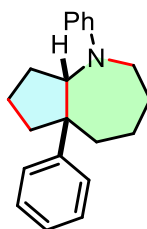

**45**

**(5a*R*,8a*S*)-1,5a-Diphenyldecahydrocyclopenta[b]azepine**

33.8 mg, 58% yield. Yellow oil (Flash column chromatography eluent, petroleum ether/ethyl acetate = 100/1, V/V).

**<sup>1</sup>H NMR** (400 MHz, CDCl<sub>3</sub>)  $\delta$  7.28–7.19 (m, 6H), 7.15–7.09 (m, 1H), 6.81 (d,  $J$  = 8.0 Hz, 2H), 6.68 (t,  $J$  = 7.2 Hz, 1H), 4.68 (t,  $J$  = 8.0 Hz, 1H), 3.58–3.48 (m, 1H), 3.44–3.35 (m, 1H), 2.16–2.03 (m, 3H), 1.99–1.84 (m, 4H), 1.83–1.77 (m, 1H), 1.74–1.61 (m, 2H), 1.54–1.45 (m, 1H), 1.45–1.36 (m, 1H).

**<sup>13</sup>C NMR** (100 MHz, CDCl<sub>3</sub>)  $\delta$  151.09, 151.07, 129.4, 128.2, 126.8, 125.5, 116.4, 113.4, 64.8, 53.8, 45.4, 40.1, 37.1, 28.0, 27.7, 22.1, 21.5.

**HRMS (ESI)  $m/z$** : Calcd for C<sub>21</sub>H<sub>26</sub>N<sup>+</sup> [M + H]<sup>+</sup>: 292.2060; found: 292.2057.

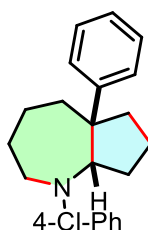

**46**

**(5aR,8aS)-1-(4-Chlorophenyl)-5a-phenyldecahydrocyclopenta[*b*]azepine**

31.3 mg, 48% yield. Yellow oil (Flash column chromatography eluent, petroleum ether/ethyl acetate = 100/1, V/V).

**<sup>1</sup>H NMR** (400 MHz, CDCl<sub>3</sub>)  $\delta$  7.23 (d,  $J$  = 4.0 Hz, 4H), 7.16–7.11 (m, 3H), 6.73–6.67 (m, 2H), 4.60 (t,  $J$  = 8.0 Hz, 1H), 3.54–3.48 (m, 1H), 3.37–3.31 (m, 1H), 2.15–2.02 (m, 3H), 1.98–1.73 (m, 7H), 1.44–1.37 (m, 1H).

**<sup>13</sup>C NMR** (100 MHz, CDCl<sub>3</sub>)  $\delta$  150.8, 149.6, 129.1, 128.2, 126.7, 125.6, 120.9, 114.5, 65.2, 53.8, 45.3, 40.3, 36.9, 27.8, 27.7, 22.1, 21.4.

**HRMS (ESI)  $m/z$** : Calcd for C<sub>21</sub>H<sub>24</sub>ClN<sup>+</sup> [M + H]<sup>+</sup>: 326.1670; found: 326.1668.

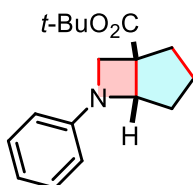

**47**

***tert*-Butyl 6-phenyl-6-azabicyclo[3.2.0]heptane-1-carboxylate**

38.3 mg, 70% yield. Yellow oil (Flash column chromatography eluent, petroleum ether/ethyl acetate = 200/1, V/V).

**<sup>1</sup>H NMR** (400 MHz, CDCl<sub>3</sub>)  $\delta$  7.12 (t,  $J$  = 7.6 Hz, 2H), 6.62 (t,  $J$  = 7.2 Hz, 1H), 6.35 (d,  $J$  = 8.0 Hz, 2H), 4.45 (d,  $J$  = 3.6 Hz, 1H), 4.03 (d,  $J$  = 7.2 Hz, 1H), 3.54 (d,  $J$  = 7.6 Hz, 1H), 2.01–1.91 (m, 3H), 1.84–1.75 (m, 1H), 1.64–1.41 (m, 2H), 1.37 (s, 9H).

**<sup>13</sup>C NMR** (100 MHz, CDCl<sub>3</sub>)  $\delta$  174.2, 149.5, 129.1, 116.8, 110.7, 80.9, 72.8, 57.1, 50.7, 34.9, 32.5, 28.1, 25.4.

**HRMS (ESI)  $m/z$** : Calcd for C<sub>17</sub>H<sub>24</sub>NO<sub>2</sub><sup>+</sup> [M + H]<sup>+</sup>: 274.1802; found: 274.1799.

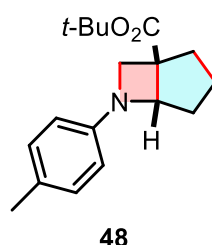

***tert*-Butyl 6-(*p*-tolyl)-6-azabicyclo[3.2.0]heptane-1-carboxylate**

32 mg, 56% yield. Yellow oil (Flash column chromatography eluent, petroleum ether/ethyl acetate = 200/1, V/V).

**<sup>1</sup>H NMR** (400 MHz, CDCl<sub>3</sub>)  $\delta$  7.01 (d,  $J$  = 8.0 Hz, 2H), 6.35 (d,  $J$  = 8.4 Hz, 2H), 4.48 (d,  $J$  = 4.0 Hz, 1H), 4.06 (d,  $J$  = 7.6 Hz, 1H), 3.60 (d,  $J$  = 7.6 Hz, 1H), 2.24 (s, 3H), 2.09–1.94 (m, 4H), 1.63–1.57 (m, 2H), 1.44 (s, 9H).

**<sup>13</sup>C NMR** (100 MHz, CDCl<sub>3</sub>)  $\delta$  174.4, 147.6, 129.7, 126.0, 110.9, 80.8, 73.1, 57.3, 50.7, 34.9, 32.6, 28.1, 25.4, 20.5.

**HRMS (ESI)  $m/z$** : Calcd for C<sub>18</sub>H<sub>26</sub>NO<sub>2</sub><sup>+</sup> [M + H]<sup>+</sup>: 288.1958; found: 288.1952.

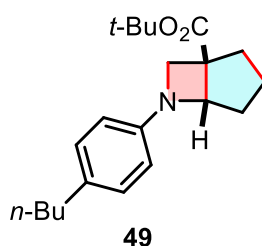

***tert*-Butyl 6-(4-butylphenyl)-6-azabicyclo[3.2.0]heptane-1-carboxylate**

55.0 mg, 84% yield. Yellow oil (Flash column chromatography eluent, petroleum ether/ethyl acetate = 100/1, V/V).

**<sup>1</sup>H NMR** (400 MHz, CDCl<sub>3</sub>)  $\delta$  7.04 (d,  $J$  = 8.4 Hz, 2H), 6.81 (d,  $J$  = 8.4 Hz, 2H), 6.10 (d,  $J$  = 1.2 Hz, 1H), 5.41 (d,  $J$  = 1.2 Hz, 1H), 4.19–4.13 (m, 2H), 2.60–2.56 (m, 1H), 2.55–2.50 (m, 2H), 1.61–1.56 (m, 2H), 1.53 (s, 9H), 1.38–1.33 (m, 2H), 0.93 (t,  $J$  = 7.2 Hz, 3H), 0.82–0.76 (m, 2H), 0.66–0.60 (m, 2H).

**<sup>13</sup>C NMR** (100 MHz, CDCl<sub>3</sub>)  $\delta$  166.0, 147.5, 139.2, 131.8, 128.8, 123.9, 113.5, 81.1, 53.8, 34.8, 34.1, 33.0, 28.3, 22.6, 14.1, 8.7.

**HRMS (ESI)  $m/z$** : Calcd for C<sub>21</sub>H<sub>32</sub>NO<sub>2</sub><sup>+</sup> [M + H]<sup>+</sup>: 330.2428; found: 330.2425.

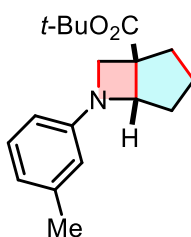

**50**

***tert*-Butyl 6-(*m*-tolyl)-6-azabicyclo[3.2.0]heptane-1-carboxylate**

24.1 mg, 42% yield. Yellow oil (Flash column chromatography eluent, petroleum ether/ethyl acetate = 100/1, V/V).

**<sup>1</sup>H NMR** (400 MHz, CDCl<sub>3</sub>)  $\delta$  7.12–7.07 (m, 1H), 6.52 (d,  $J$  = 7.6 Hz, 1H), 6.24 (s, 2H), 4.52 (d,  $J$  = 4.4 Hz, 1H), 4.09 (d,  $J$  = 7.6 Hz, 1H), 3.61 (d,  $J$  = 7.6 Hz, 1H), 2.29 (s, 3H), 2.09–1.98 (m, 4H), 1.91–1.77 (m, 2H), 1.44 (s, 9H).

**<sup>13</sup>C NMR** (100 MHz, CDCl<sub>3</sub>)  $\delta$  174.3, 149.6, 139.0, 129.0, 117.8, 111.4, 107.9, 80.9, 72.8, 57.2, 50.7, 34.9, 32.5, 28.1, 25.4, 21.8.

**HRMS (ESI)  $m/z$** : Calcd for C<sub>18</sub>H<sub>26</sub>NO<sub>2</sub><sup>+</sup> [M+H]<sup>+</sup>: 288.1958; found: 288.1971.

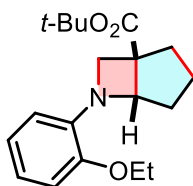

51

***tert*-Butyl 6-(*p*-tolyl)-6-azabicyclo[3.2.0]heptane-1-carboxylate**

56.4 mg, 89% yield. Yellow oil (Flash column chromatography eluent, petroleum ether/ethyl acetate = 200/1, V/V).

**<sup>1</sup>H NMR** (400 MHz, CDCl<sub>3</sub>)  $\delta$  6.87–6.81 (m, 1H), 6.76 (t,  $J$  = 6.8 Hz, 1H), 6.69 (t,  $J$  = 6.8 Hz, 1H), 6.43 (t,  $J$  = 7.2 Hz, 1H), 4.74–4.68 (m, 1H), 4.25–4.18 (m, 1H), 4.03–3.94 (m, 2H), 3.79–3.72 (m, 1H), 2.11–1.82 (m, 5H), 1.66–1.55 (m, 1H), 1.48–1.39 (m, 12H).

**<sup>13</sup>C NMR** (100 MHz, CDCl<sub>3</sub>)  $\delta$  174.7, 147.9, 138.9, 121.2, 118.1, 112.3, 112.1, 80.6, 74.0, 63.7, 58.6, 50.4, 35.3, 33.2, 28.1, 25.5, 15.0.

**HRMS (ESI)  $m/z$** : Calcd for C<sub>19</sub>H<sub>28</sub>NO<sub>3</sub><sup>+</sup> [ $M + H$ ]<sup>+</sup>: 318.2064; found: 318.2062.

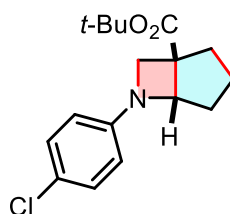

52

***tert*-Butyl 6-(4-butylphenyl)-6-azabicyclo[3.2.0]heptane-1-carboxylate**

55.0 mg, 84% yield. Yellow oil (Flash column chromatography eluent, petroleum ether/ethyl acetate = 100/1, V/V).

**<sup>1</sup>H NMR** (400 MHz, CDCl<sub>3</sub>)  $\delta$  7.04 (d,  $J$  = 8.4 Hz, 2H), 6.81 (d,  $J$  = 8.4 Hz, 2H), 6.10 (d,  $J$  = 1.2 Hz, 1H), 5.41 (d,  $J$  = 1.2 Hz, 1H), 4.19–4.13 (m, 2H), 2.60–2.56 (m, 1H), 2.55–2.50 (m, 2H), 1.61–1.56 (m, 2H), 1.53 (s, 9H), 1.38–1.33 (m, 2H), 0.93 (t,  $J$  = 7.2 Hz, 3H), 0.82–0.76 (m, 2H), 0.66–0.60 (m, 2H).

**<sup>13</sup>C NMR** (100 MHz, CDCl<sub>3</sub>)  $\delta$  166.0, 147.5, 139.2, 131.8, 128.8, 123.9, 113.5, 81.1, 53.8, 34.8, 34.1, 33.0, 28.3, 22.6, 14.1, 8.7.

**HRMS (ESI)  $m/z$** : Calcd for C<sub>21</sub>H<sub>32</sub>NO<sub>2</sub><sup>+</sup> [ $M + H$ ]<sup>+</sup>: 330.2428; found: 330.2425.

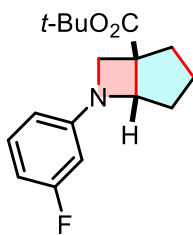

53

***tert*-Butyl 6-(3-fluorophenyl)-6-azabicyclo[3.2.0]heptane-1-carboxylate**

43 mg, 73% yield. White solid, melting point: 105.2–105.9 °C (Flash column chromatography eluent, petroleum ether/ethyl acetate = 200/1, V/V).

**<sup>1</sup>H NMR** (400 MHz, CDCl<sub>3</sub>)  $\delta$  7.15–7.08 (m, 1H), 6.40–6.34 (m, 1H), 6.19–6.14 (m, 1H), 6.12–6.06 (m, 1H), 4.52 (d,  $J$  = 4.4 Hz, 1H), 4.10 (d,  $J$  = 7.6 Hz, 1H), 3.59 (d,  $J$  = 7.6 Hz, 1H), 2.10–1.99 (m, 4H), 1.92–1.85 (m, 1H), 1.62–1.57 (m, 1H), 1.45 (s, 9H).

**<sup>13</sup>C NMR** (100 MHz, CDCl<sub>3</sub>)  $\delta$  173.9, 164.2 (d,  $J$  = 243.2 Hz), 151.0 (d,  $J$  = 10.6 Hz), 130.3 (d,  $J$  = 10.2 Hz), 106.4 (d,  $J$  = 2.2 Hz), 103.3 (d,  $J$  = 21.7 Hz), 97.7 (d,  $J$  = 25.0 Hz), 81.1, 72.8, 57.1, 50.7, 34.6, 32.1, 28.1, 25.3.

**<sup>19</sup>F NMR** (376 MHz, CDCl<sub>3</sub>)  $\delta$  –109.87 ~ –117.67 (m).

**HRMS (ESI)  $m/z$** : Calcd for C<sub>17</sub>H<sub>23</sub>FO<sub>2</sub><sup>+</sup> [M + H]<sup>+</sup>: 292.1707; found: 292.1705.

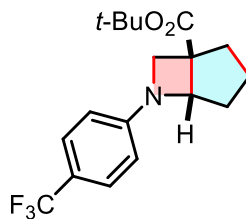

54

***tert*-Butyl 6-(4-(trifluoromethyl)phenyl)-6-azabicyclo[3.2.0]heptane-1-carboxylate**

25.3 mg, 37% yield. Yellow oil (Flash column chromatography eluent, petroleum ether/ethyl acetate = 200/1, V/V).

**<sup>1</sup>H NMR** (400 MHz, CDCl<sub>3</sub>)  $\delta$  7.47–7.37 (m, 2H), 6.45–6.35 (m, 2H), 4.59 (d,  $J$  = 3.6 Hz, 1H), 4.16 (d,  $J$  = 6.4 Hz, 1H), 3.67–3.60 (m, 1H), 2.12–1.98 (m, 4H), 1.94–1.87 (m, 1H), 1.62–1.59 (m, 1H), 1.46 (s, 9H).

$^{13}\text{C}$  NMR (100 MHz,  $\text{CDCl}_3$ )  $\delta$  173.7, 151.1, 126.5 (q,  $J = 9.2$  Hz), 118.3 (q,  $J = 57.2$  Hz), 109.9, 81.3, 77.5, 77.2, 76.8, 72.5, 56.9, 50.8, 34.6, 31.9, 28.1, 25.2.

$^{19}\text{F}$  NMR (376 MHz,  $\text{CDCl}_3$ )  $\delta$  -60.85 (s).

HRMS (ESI)  $m/z$ : Calcd for  $\text{C}_{18}\text{H}_{23}\text{F}_3\text{NO}_2^+$   $[\text{M} + \text{H}]^+$ : 342.1675; found: 342.1671.

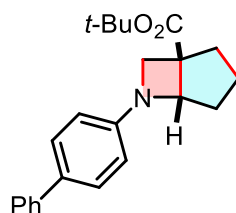

55

***tert*-Butyl 6-([1,1'-biphenyl]-4-yl)-6-azabicyclo[3.2.0]heptane-1-carboxylate**

53.1 mg, 76% yield. White solid, melting point: 112.2–112.9 °C (Flash column chromatography eluent, petroleum ether/ethyl acetate = 100/1, V/V).

$^1\text{H}$  NMR (400 MHz,  $\text{CDCl}_3$ )  $\delta$  7.52 (d,  $J = 8.0$  Hz, 2H), 7.46 (d,  $J = 7.2$  Hz, 2H), 7.38 (t,  $J = 7.2$  Hz, 2H), 7.24 (t,  $J = 6.0$  Hz, 1H), 6.49 (d,  $J = 7.2$  Hz, 2H), 4.57 (d,  $J = 3.6$  Hz, 1H), 4.15 (d,  $J = 7.6$  Hz, 1H), 3.65 (d,  $J = 6.8$  Hz, 1H), 2.14–1.98 (m, 4H), 1.93–1.85 (m, 1H), 1.60 (d,  $J = 5.2$  Hz, 1H), 1.45 (d,  $J = 1.2$  Hz, 9H).

$^{13}\text{C}$  NMR (100 MHz,  $\text{CDCl}_3$ )  $\delta$  174.1, 148.8, 141.5, 129.8, 128.8, 127.9, 126.5, 126.1, 111.0, 81.0, 72.8, 57.2, 50.7, 34.8, 32.4, 28.1, 25.4.

HRMS (ESI)  $m/z$ : Calcd for  $\text{C}_{23}\text{H}_{28}\text{NO}_2^+$   $[\text{M} + \text{H}]^+$ : 350.2115; found: 350.2111.

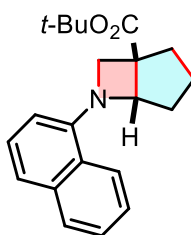

56

***tert*-Butyl 6-(naphthalen-1-yl)-6-azabicyclo[3.2.0]heptane-1-carboxylate**

47.0 mg, 72% yield. Yellow oil (Flash column chromatography eluent, petroleum ether/ethyl acetate = 100/1, V/V).





**4-(1-Phenylhexahydrocyclopenta[*b*]pyrrol-3a(1*H*)-yl)benzyl 2-(4-((2-oxocyclopentyl)methyl)phenyl)propanoate**

98.1 mg, 94% yield. Yellow oil (Flash column chromatography eluent, petroleum ether/ethyl acetate = 5/1, V/V).

**<sup>1</sup>H NMR** (400 MHz, CDCl<sub>3</sub>)  $\delta$  7.26 (d, *J* = 7.6 Hz, 1H), 7.23 (d, *J* = 3.2 Hz, 1H), 7.20 (d, *J* = 8.0 Hz, 2H), 7.15 (s, 4H), 7.10 (d, *J* = 8.0 Hz, 2H), 6.71 (t, *J* = 7.2 Hz, 1H), 6.63 (d, *J* = 8.0 Hz, 2H), 5.10–4.99 (m, 2H), 4.17 (d, *J* = 7.6 Hz, 1H), 3.72 (q, *J* = 7.2 Hz, 1H), 3.54–3.48 (m, 1H), 3.30–3.23 (m, 1H), 3.13–3.08 (m, 1H), 2.53–2.46 (m, 1H), 2.36–2.26 (m, 3H), 2.23–2.18 (m, 1H), 2.11–1.99 (m, 4H), 1.93–1.79 (m, 5H), 1.75–1.64 (m, 2H), 1.48 (d, *J* = 7.2 Hz, 3H).

**<sup>13</sup>C NMR** (100 MHz, CDCl<sub>3</sub>)  $\delta$  220.2, 174.5, 148.9, 147.0, 138.9, 138.3, 133.7, 129.24, 129.17, 128.0, 127.7, 126.2, 116.0, 112.5, 69.8, 66.2, 58.4, 51.0, 47.5, 45.2, 38.7, 38.5, 38.3, 35.2, 33.1, 29.2, 24.1, 20.6, 18.6.

**HRMS (ESI) *m/z***: Calcd for C<sub>35</sub>H<sub>40</sub>NO<sub>3</sub><sup>+</sup> [*M* + *H*]<sup>+</sup>: 522.3003; found: 522.2999.

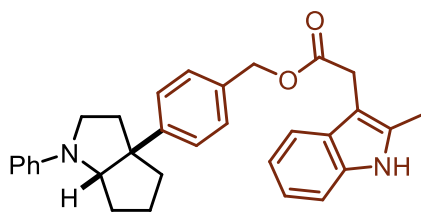

**59**

from 3-Indoleacetic acid

**4-(1-Phenylhexahydrocyclopenta[*b*]pyrrol-3a(1*H*)-yl)benzyl 2-(2-methyl-1*H*-indol-3-yl)acetate**

70 mg, 75% yield. Yellow oil (Flash column chromatography eluent, petroleum ether/ethyl acetate = 5/1, V/V).

**<sup>1</sup>H NMR** (400 MHz, CDCl<sub>3</sub>)  $\delta$  7.79 (s, 1H), 7.48 (d, *J* = 8.0 Hz, 1H), 7.27 (t, *J* = 8.0 Hz, 2H), 7.21–7.14 (m, 5H), 7.10–7.03 (m, 2H), 6.72 (t, *J* = 7.2 Hz, 1H), 6.64 (d, *J* = 8.0 Hz, 2H), 5.05 (s, 2H), 4.16 (d, *J* = 7.6 Hz, 1H), 3.70 (s, 2H), 3.54–3.47 (m, 1H), 3.30–3.22 (m, 1H), 2.31 (d, *J* = 4.8 Hz, 3H), 2.28–2.18 (m, 2H), 2.05–1.97 (m, 2H), 1.92–1.78 (m, 4H).

$^{13}\text{C}$  NMR (100 MHz,  $\text{CDCl}_3$ )  $\delta$  172.0, 149.0, 147.1, 135.2, 133.7, 132.8, 129.3, 128.5, 128.3, 126.2, 121.3, 119.6, 118.2, 116.0, 112.6, 110.4, 104.5, 69.9, 66.3, 58.4, 47.6, 38.7, 38.6, 33.1, 30.5, 24.2, 11.8.

HRMS (ESI)  $m/z$ : Calcd for  $\text{C}_{31}\text{H}_{33}\text{N}_2\text{O}_2^+$   $[\text{M} + \text{H}]^+$ : 465.2537; found: 465.2534.

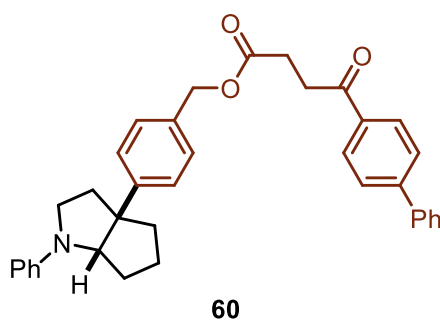

from Fenbufen

**4-(1-Phenylhexahydrocyclopenta[*b*]pyrrol-3a(1*H*)-yl)benzyl 4-([1,1'-biphenyl]-4-yl)-4-oxobutanoate**

60.4 mg, 57% yield. Yellow oil (Flash column chromatography eluent, petroleum ether/ethyl acetate = 5/1, V/V).

$^1\text{H}$  NMR (400 MHz,  $\text{CDCl}_3$ )  $\delta$  8.03 (d,  $J$  = 8.0 Hz, 2H), 7.67 (d,  $J$  = 8.0 Hz, 2H), 7.61 (d,  $J$  = 7.6 Hz, 2H), 7.46 (t,  $J$  = 7.2 Hz, 2H), 7.41–7.33 (m, 1H), 7.28–7.17 (m, 6H), 6.71 (t,  $J$  = 7.2 Hz, 1H), 6.63 (d,  $J$  = 8.0 Hz, 2H), 5.11 (s, 2H), 4.18 (d,  $J$  = 7.2 Hz, 1H), 3.51 (t,  $J$  = 6.8 Hz, 1H), 3.34 (t,  $J$  = 6.4 Hz, 2H), 3.29–3.21 (m, 1H), 2.82 (t,  $J$  = 6.4 Hz, 2H), 2.31–2.16 (m, 2H), 2.05–1.96 (m, 2H), 1.92–1.76 (m, 4H).

$^{13}\text{C}$  NMR (100 MHz,  $\text{CDCl}_3$ )  $\delta$  197.7, 172.9, 149.2, 147.1, 146.0, 139.9, 135.3, 133.6, 129.3, 129.1, 128.8, 128.5, 128.4, 127.4, 127.3, 126.3, 116.0, 112.6, 69.9, 66.4, 58.4, 47.6, 38.7, 38.6, 33.5, 33.1, 28.4, 24.1.

HRMS (ESI)  $m/z$ : Calcd for  $\text{C}_{36}\text{H}_{36}\text{NO}_3^+$   $[\text{M} + \text{H}]^+$ : 530.2690; found: 530.2690.

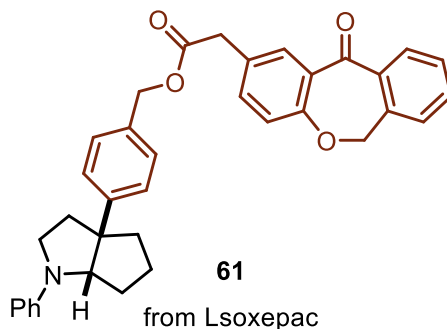

**4-(1-Phenylhexahydrocyclopenta[*b*]pyrrol-3a(1*H*)-yl)benzyl 2-(11-oxo-6,11-dihydrodibenz[*b,e*]oxepin-2-yl)acetate**

69 mg, 63% yield. Yellow oil (Flash column chromatography eluent, petroleum ether/ethyl acetate = 10/1, V/V).

**<sup>1</sup>H NMR** (400 MHz, CDCl<sub>3</sub>)  $\delta$  8.11 (d, *J* = 2.4 Hz, 1H), 7.87 (d, *J* = 7.6 Hz, 1H), 7.53 (t, *J* = 7.6 Hz, 1H), 7.47–7.39 (m, 2H), 7.33 (d, *J* = 7.6 Hz, 1H), 7.27–7.22 (m, 4H), 7.19 (d, *J* = 8.4 Hz, 2H), 7.01 (d, *J* = 8.4 Hz, 1H), 6.71 (t, *J* = 7.2 Hz, 1H), 6.63 (d, *J* = 8.0 Hz, 2H), 5.15 (s, 2H), 5.09 (s, 2H), 4.18 (d, *J* = 8.0 Hz, 1H), 3.66 (s, 2H), 3.54–3.47 (m, 1H), 3.31–3.22 (m, 1H), 2.30–2.17 (m, 2H), 2.05–1.97 (m, 2H), 1.93–1.78 (m, 4H).

**<sup>13</sup>C NMR** (100 MHz, CDCl<sub>3</sub>)  $\delta$  190.9, 171.3, 160.6, 149.2, 147.1, 140.5, 136.5, 135.6, 133.4, 132.8, 132.6, 129.6, 129.34, 129.25, 128.5, 127.9, 127.8, 126.3, 125.2, 121.2, 116.0, 112.6, 73.7, 69.8, 66.6, 58.4, 47.6, 40.2, 38.65, 38.58, 33.1, 24.1.

**HRMS (ESI) *m/z***: Calcd for C<sub>36</sub>H<sub>34</sub>NO<sub>4</sub><sup>+</sup> [*M* + *H*]<sup>+</sup>: 544.2482; found: 544.2482.

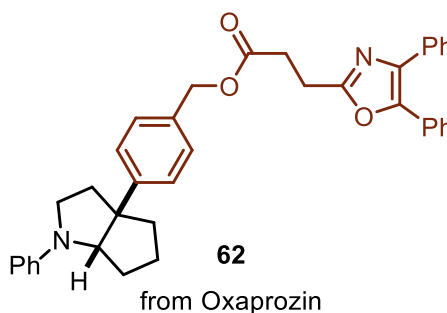

**4-(1-Phenylhexahydrocyclopenta[*b*]pyrrol-3a(1*H*)-yl)benzyl 3-(4,5-diphenyloxazol-2-yl)propanoate**

107 mg, 94% yield. Yellow oil (Flash column chromatography eluent, petroleum ether/ethyl acetate = 5/1, V/V).

**<sup>1</sup>H NMR** (400 MHz, CDCl<sub>3</sub>)  $\delta$  7.63–7.60 (m, 2H), 7.55–7.52 (m, 2H), 7.34–7.28 (m, 6H), 7.26–7.21 (m, 4H), 7.14 (d,  $J$  = 8.4 Hz, 2H), 6.73–6.68 (m, 1H), 6.62 (d,  $J$  = 8.0 Hz, 2H), 5.11 (s, 2H), 4.15 (d,  $J$  = 8.4 Hz, 1H), 3.52–3.46 (m, 1H), 3.28–3.22 (m, 1H), 3.18 (t,  $J$  = 7.6 Hz, 2H), 2.94 (t,  $J$  = 7.6 Hz, 2H), 2.28–2.13 (m, 2H), 2.02–1.95 (m, 2H), 1.86–1.76 (m, 4H).

**<sup>13</sup>C NMR** (100 MHz, CDCl<sub>3</sub>)  $\delta$  171.9, 161.8, 149.1, 147.0, 145.5, 135.2, 133.4, 132.5, 129.3, 129.1, 128.7, 128.6, 128.5, 128.3, 128.1, 128.0, 126.5, 126.3, 116.0, 112.6, 69.8, 66.4, 58.4, 47.5, 38.64, 38.58, 33.1, 31.2, 24.1, 23.6.

**HRMS (ESI)  $m/z$** : Calcd for C<sub>38</sub>H<sub>37</sub>N<sub>2</sub>O<sub>3</sub><sup>+</sup> [M + H]<sup>+</sup>: 569.2799; found: 569.2797.

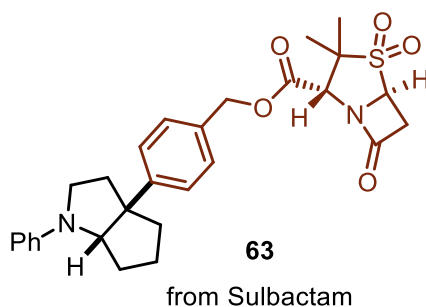

**4-(1-Phenylhexahydrocyclopenta[b]pyrrol-3a(1H)-yl)benzyl (2R,5S)-3,3-dimethyl-1-7-oxo-4-thia-1-azabicyclo[3.2.0]heptane-2-carboxylate 4,4-dioxide**

41 mg, 40% yield. Yellow oil (Flash column chromatography eluent, petroleum ether/ethyl acetate = 5/1, V/V).

**<sup>1</sup>H NMR** (400 MHz, CDCl<sub>3</sub>)  $\delta$  7.33–7.25 (m, 6H), 6.77 (t,  $J$  = 7.2 Hz, 1H), 6.71 (t,  $J$  = 14.8 Hz, 2H), 5.33–5.05 (m, 2H), 4.64 (d,  $J$  = 2.0 Hz, 1H), 4.44 (s, 1H), 4.23 (d,  $J$  = 7.6 Hz, 1H), 3.61–3.54 (m, 1H), 3.54–3.43 (m, 2H), 3.39–3.26 (m, 1H), 2.40–2.22 (m, 2H), 2.12–2.03 (m, 2H), 2.00–1.85 (m, 4H), 1.60 (s, 3H), 1.34 (s, 3H).

**<sup>13</sup>C NMR** (100 MHz, CDCl<sub>3</sub>)  $\delta$  170.8, 167.0, 150.1, 147.0, 132.0, 129.3, 129.0, 126.6, 116.1, 112.6, 69.9, 68.0, 63.3, 62.9, 61.2, 58.5, 47.6, 38.7, 38.6, 38.4, 33.1, 24.1, 20.3, 18.8.

**HRMS (ESI)  $m/z$** : Calcd for C<sub>28</sub>H<sub>33</sub>N<sub>2</sub>O<sub>5</sub>S<sup>+</sup> [M + H]<sup>+</sup>: 509.2105; found: 509.2100.

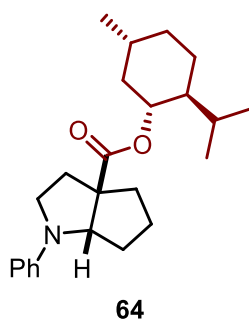

from (-)-Menthol

**(1*R*,2*S*,5*R*)-2-*iso*-Propyl-5-methylcyclohexyl(3*aR*,6*aS*)-1-phenylhexahydrocyclopenta[*b*]pyrrole-3*a*(1*H*)-carboxylate**

60 mg, 81% yield. Yellow oil (Flash column chromatography eluent, petroleum ether/ethyl acetate = 100/1, V/V).

**<sup>1</sup>H NMR** (400 MHz, CDCl<sub>3</sub>)  $\delta$  7.26–7.20 (m, 2H), 6.73–6.67 (m, 1H), 6.64–6.55 (m, 2H), 4.71–4.58 (m, 1H), 4.25–4.14 (m, 1H), 3.56–3.46 (m, 1H), 3.34–3.23 (m, 1H), 2.51–2.42 (m, 1H), 2.15–2.06 (m, 1H), 2.01–1.91 (m, 3H), 1.85–1.64 (m, 7H), 1.51–1.35 (m, 2H), 1.08–1.00 (m, 1H), 0.91–0.86 (m, 5H), 0.81–0.63 (m, 5H).

**<sup>13</sup>C NMR** (100 MHz, CDCl<sub>3</sub>)  $\delta$  176.13, 176.10, 147.44, 147.39, 129.16, 129.15, 116.33, 116.31, 113.0, 112.9, 74.73, 74.70, 68.7, 68.2, 60.3, 60.2, 49.0, 48.7, 47.2, 47.1, 40.8, 40.7, 37.0, 36.8, 34.6, 34.5, 34.38, 34.36, 33.4, 33.2, 31.5, 26.4, 26.3, 25.2, 25.1, 23.4, 23.3, 22.2, 22.1, 21.0, 20.9, 16.2, 16.1.

**HRMS (ESI) *m/z***: Calcd for C<sub>24</sub>H<sub>36</sub>NO<sub>2</sub><sup>+</sup> [M + H]<sup>+</sup>: 370.2741; found: 370.2751.

## 5. Gram level reaction and derivatization experiment

### 5.1 General procedure for the synthesis of **3** in 3.0 mmol scale

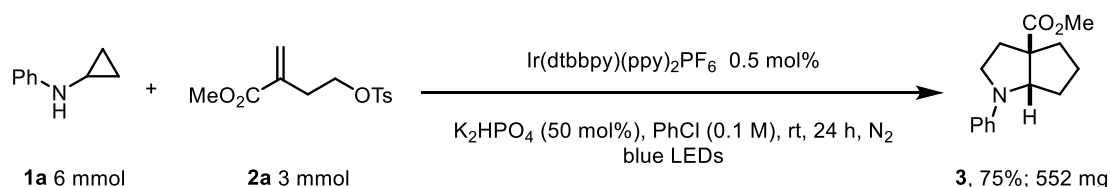

In the glove box, a 10 mL Schlenk tube equipped with a magnetic stir bar was charged with *N*-phenyl cyclopropylamine **1a** (798 mg, 6.00 mmol), **2a** (852 mg, 3.00 mmol), Ir(dtbbpy)(ppy)<sub>2</sub>PF<sub>6</sub> (13.7 mg, 0.015 mmol, 0.5 mol%), K<sub>2</sub>HPO<sub>4</sub> (261 mg, 1.5

mmol, 50 mol%) and PhCl (30.0 mL). Then irradiated by blue LEDs for 24 h. After completion of the reaction, the solvent was removed under reduced pressure, and the residue was purified with silica gel chromatography (petroleum ether/ethyl acetate = 100:1, V/V) to give the product **3** (552 mg, 75% yield).

## 5.2 General procedure for the reduction of **3**

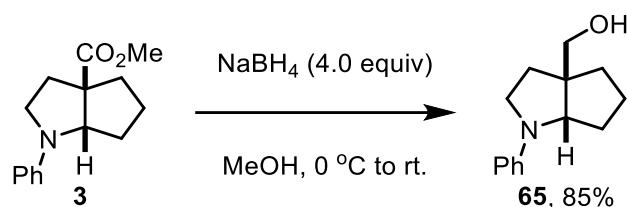

A round-bottom flask equipped with a stir bar was charged with **3** (245 mg, 1 mmol). Then, dry MeOH (20.0 ml) was added, followed by the addition of NaBH<sub>4</sub> (148 mg, 4.00 mmol, 4.00 equiv) in an ice water bath. After the addition is complete, let the reaction proceed at room temperature for 24 h. After completion of the reaction, the solvent was removed under reduced pressure, and the residue was purified with silica gel chromatography (petroleum ether/ethyl acetate = 10:1, V/V) to give the product **65** (85% yield).

### 1-Phenylhexahydrocyclopenta[*b*]pyrrol-3a(1*H*)-yl)methanol (**65**)

**<sup>1</sup>H NMR** (400 MHz, CDCl<sub>3</sub>)  $\delta$  7.22 (t,  $J$  = 8.0 Hz, 2H), 6.68 (t,  $J$  = 7.2 Hz, 1H), 6.60 (d,  $J$  = 8.0 Hz, 2H), 3.66 (dd,  $J$  = 6.0, 2.8 Hz, 1H), 3.56 (q,  $J$  = 10.8 Hz, 2H), 3.47 (td,  $J$  = 8.8, 4.8 Hz, 1H), 3.24 (dd,  $J$  = 16.8, 8.0 Hz, 1H), 2.03 (ddd,  $J$  = 12.4, 7.2, 4.8 Hz, 1H), 1.88–1.74 (m, 4H), 1.72–1.65 (m, 2H), 1.64–1.54 (m, 2H).

**<sup>13</sup>C NMR** (100 MHz, CDCl<sub>3</sub>)  $\delta$  147.7, 129.2, 116.1, 113.0, 68.6, 66.8, 56.3, 48.4, 35.5, 33.6, 33.0, 24.8.

**HRMS (ESI)  $m/z$** : Calcd for C<sub>14</sub>H<sub>20</sub>NO<sup>+</sup> [ $M + H$ ]<sup>+</sup>: 218.1539; found: 218.1538.

### 5.3 General procedure for the derivatizations of **65**

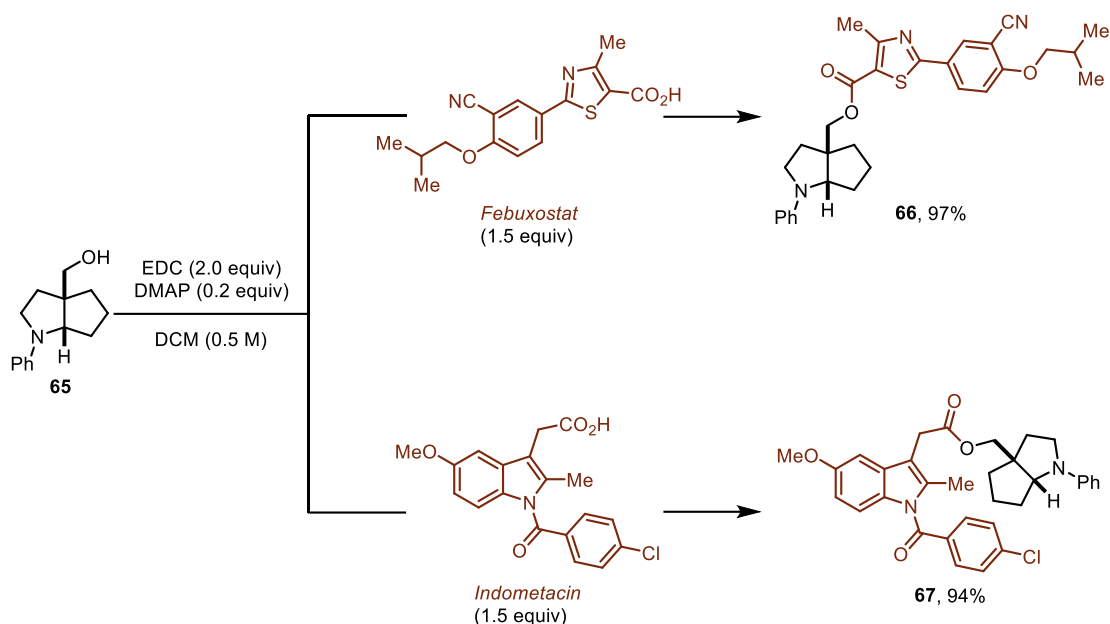

Added **65** (43.5 mg, 0.2 mmol) to a solution of *Febuxostat* or *Indometacin* (1.5 equiv.), DMAP (0.2 equiv.) and EDC (2.0 equiv.) in dry DCM (0.5 M) at 0 °C. Warm the reaction mixture to rt and stir for 12 h. After completion of the reaction, the solvent was removed under reduced pressure, and the residue was purified with silica gel chromatography (petroleum ether/ethyl acetate = 5:1, V/V) to give the product **66** or **67**, respectively.

#### (1-Phenylhexahydrocyclopenta[*b*]pyrrol-3a(1*H*)-yl)methyl 2-(3-cyano-4-isobutoxyphenyl)-4-methylthiazole-5-carboxylate (**66**)

100 mg, 97% yield. Colorless oil (Flash column chromatography eluent, petroleum ether/ethyl acetate = 5/1, V/V).

<sup>1</sup>H NMR (400 MHz, CDCl<sub>3</sub>) δ 8.09 (d, *J* = 2.4 Hz, 1H), 8.06–8.01 (m, 1H), 7.26 (t, *J* = 8.0 Hz, 2H), 6.99 (d, *J* = 8.8 Hz, 1H), 6.74 (t, *J* = 7.2 Hz, 1H), 6.64 (d, *J* = 8.0 Hz, 2H), 4.28 (q, *J* = 10.8 Hz, 2H), 3.90 (d, *J* = 6.4 Hz, 2H), 3.85–3.79 (m, 1H), 3.59–3.51 (m, 1H), 3.38–3.30 (m, 1H), 2.74 (s, 3H), 2.25–2.16 (m, 1H), 2.11–1.98 (m, 2H), 1.94–1.81 (m, 2H), 1.80–1.67 (m, 4H), 1.10 (d, *J* = 6.8 Hz, 6H).

$^{13}\text{C}$  NMR (100 MHz,  $\text{CDCl}_3$ )  $\delta$  167.5, 162.6, 162.1, 161.5, 147.6, 132.7, 132.2, 129.2, 126.0, 121.5, 116.4, 115.5, 113.0, 112.7, 103.0, 75.8, 70.9, 67.4, 54.1, 48.6, 36.0, 34.4, 33.2, 28.3, 24.7, 19.2, 17.6.

HRMS (ESI)  $m/z$ : Calcd for  $\text{C}_{30}\text{H}_{34}\text{N}_3\text{O}_3\text{S}^+$   $[\text{M} + \text{H}]^+$ : 516.2315; found: 516.2322

**(1-Phenylhexahydrocyclopenta[b]pyrrol-3a(1*H*)-yl)methyl 2-(1-(4-chlorobenzoyl)-5-methoxy-2-methyl-1*H*-indol-3-yl)acetate (67)**

105 mg, 94% yield. Colorless oil (Flash column chromatography eluent, petroleum ether/ethyl acetate = 5/1, V/V).

$^1\text{H}$  NMR (400 MHz,  $\text{CDCl}_3$ )  $\delta$  7.67–7.61 (m, 2H), 7.46 (d,  $J$  = 8.4 Hz, 2H), 7.19 (t,  $J$  = 8.0 Hz, 2H), 6.98–6.94 (m, 1H), 6.87 (d,  $J$  = 9.2 Hz, 1H), 6.74–6.59 (m, 1H), 6.49 (d,  $J$  = 8.0 Hz, 2H), 4.13–4.02 (m, 2H), 3.82 (s, 3H), 3.69–3.65 (m, 2H), 3.59 (d,  $J$  = 4.0 Hz, 1H), 3.47–3.39 (m, 1H), 3.21–3.11 (m, 1H), 2.34 (s, 3H), 1.93–1.79 (m, 2H), 1.73–1.52 (m, 5H), 1.30–1.25 (m, 1H).

$^{13}\text{C}$  NMR (100 MHz,  $\text{CDCl}_3$ )  $\delta$  171.1, 168.3, 156.2, 147.4, 139.4, 136.0, 134.0, 131.3, 130.9, 130.7, 129.23, 129.17, 116.3, 115.1, 112.9, 112.7, 111.7, 101.4, 69.7, 66.9, 55.8, 54.0, 48.2, 35.8, 34.0, 32.9, 30.6, 24.6, 13.4.

HRMS (ESI)  $m/z$ : Calcd for  $\text{C}_{33}\text{H}_{34}\text{ClN}_2\text{O}_4^+$   $[\text{M} + \text{H}]^+$ : 557.2202; found: 557.0208.

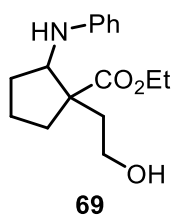

In the glove box, a 10 mL Schlenk tube equipped with a magnetic stir bar was charged with *N*-phenyl cyclopropylamine **1a** (53.2 mg, 0.4 mmol), **2b'** (28.8 mg, 0.2 mmol), Ir(dtbbpy)(ppy) $_2$ PF $_6$  (1.8 mg, 0.002 mmol, 1 mol%), K $_2$ HPO $_4$  (17.4 mg, 0.1 mmol, 50 mol%) and PhCl (2.0 mL). The reaction mixture was stirred under 2×3 W blue LEDs ( $\lambda$  = 450–455 nm) at room temperature with stirring for 24 h. After completion of the reaction, the solvent was removed under reduced pressure, and the



residue was purified with silica gel chromatography (petroleum ether/ethyl acetate = 10:1, V/V) to give the product **69**.

### Ethyl 1-(2-hydroxyethyl)-2-(phenylamino)cyclopentane-1-carboxylate

21.1 mg, 38 % yield. yellow oil.

(Flash column chromatography eluent, petroleum ether/ethyl acetate = 10/1, V/V).

**<sup>1</sup>H NMR** (400 MHz, CDCl<sub>3</sub>) δ 7.15 (t, *J* = 8.0 Hz, 2H), 6.69 (t, *J* = 7.2 Hz, 1H), 6.65 (d, *J* = 8.0 Hz, 2H), 4.25 (t, *J* = 6.8 Hz, 1H), 4.19–4.06 (m, 2H), 3.67 (t, *J* = 6.8 Hz, 2H), 2.93 (s, 1H), 2.35–2.26 (m, 1H), 2.18–2.10 (m, 2H), 1.81–1.67 (m, 4H), 1.56–1.47 (m, 1H), 1.23 (t, *J* = 7.2 Hz, 3H).

**<sup>13</sup>C NMR** (100 MHz, CDCl<sub>3</sub>) δ 177.4, 147.5, 129.4, 117.9, 113.7, 61.3, 61.1, 60.1, 55.3, 34.8, 33.6, 32.5, 21.3, 14.2.

**HRMS (ESI) m/z**: Calcd for C<sub>16</sub>H<sub>23</sub>NO<sub>3</sub><sup>+</sup> [M+H]<sup>+</sup>: 278.1751; found: 278.1748

## 6. Mechanistic studies

### 6.1 Radical trapping experiments

To further investigate the mechanism of this photocatalytic radical reaction, a control experiment was conducted using a radical scavenger TEMPO or BHT.

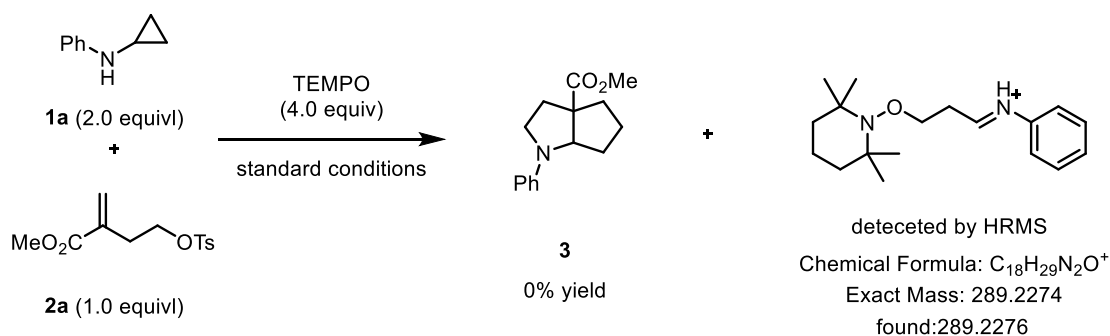

In the glove box, a 10 mL Schlenk tube equipped with a magnetic stir bar was charged with *N*-phenyl cyclopropylamine **1a** (53.2 mg, 0.4 mmol), **2a** (56.8 mg, 0.2 mmol), Ir(dtbbpy)(ppy)<sub>2</sub>PF<sub>6</sub> (0.91 mg, 0.001 mmol, 0.5 mol%), K<sub>2</sub>HPO<sub>4</sub> (17.4 mg, 0.1 mmol, 50 mol%) and PhCl (2.0 mL). Then TEMPO (126 mg, 0.8 mmol, 4.0 equiv) was added to the mixture, and irradiated by blue LEDs ( $\lambda$  = 450–455 nm) for 24 h. After

completion of the reaction, HRMS analysis of this reaction crude mixture showed that the corresponding TEMPO-adduct was detected and no product **3** was observed.

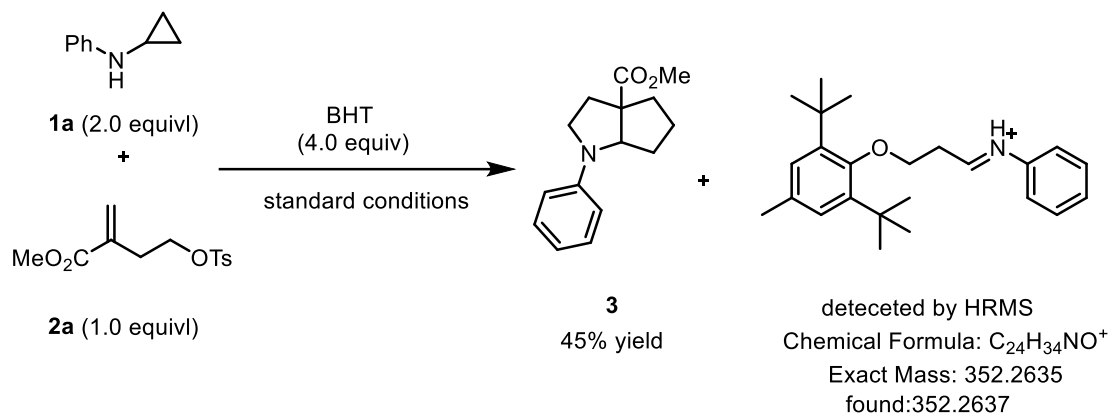

In the glove box, a 10 mL Schlenk tube equipped with a magnetic stir bar was charged with *N*-phenyl cyclopropylamine **1a** (53.2 mg, 0.4 mmol), **2a** (56.8 mg, 0.2 mmol), Ir(dtbbpy)(ppy)<sub>2</sub>PF<sub>6</sub> (0.91 mg, 0.001 mmol, 0.5 mol%), K<sub>2</sub>HPO<sub>4</sub> (17.4 mg, 0.1 mmol, 50 mol%) and PhCl (2.0 mL). Then BHT (176 mg, 0.8 mmol, 4.0 equiv) was added to the mixture, then irradiated by blue LEDs ( $\lambda = 450\text{--}455\text{ nm}$ ) for 24 h. After completion of the reaction, from crude <sup>1</sup>H-NMR with inter standard, the reaction was inhibited and product **3** was formed in 45% yield. HRMS analysis of this reaction crude mixture showed that the corresponding BHT-adduct was observed.

These results supported the speculation that the reaction proceeded *via* a radical pathway and confirmed the generation of amino radical cation.

## 6.2 Time profile of the transformation with the light ON/OFF over time.

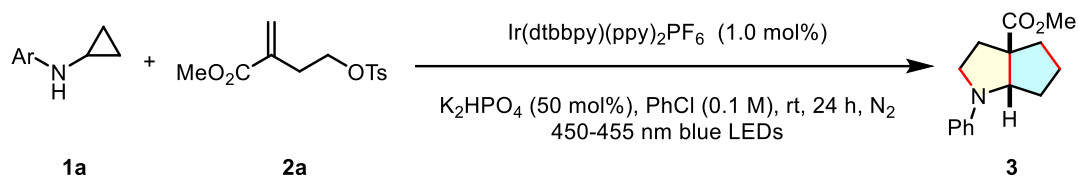

In the glove box, a 10 mL Schlenk tube equipped with a magnetic stir bar was charged with *N*-phenyl cyclopropylamine **1a** (133 mg, 1.0 mmol), **2a** (142 mg, 0.5 mmol), Ir(dtbbpy)(ppy)<sub>2</sub>PF<sub>6</sub> (2.3 mg, 0.001 mmol, 0.5 mol%), K<sub>2</sub>HPO<sub>4</sub> (43.5 mg, 0.25

mmol, 50 mol%) and PhCl (5.0 mL). The tube was sealed, irradiated with blue LEDs ( $\lambda = 450\text{--}455\text{ nm}$ ). The mixture was stirred under blue light irradiation at ambient temperature for the 4 h, then 1.0 ml of the reaction mixture was extracted from the system, turn off the light, react for 4 hours, then take out 1.0 ml from the remaining reaction solution and add it to the internal standard for nuclear magnetic analysis. Turn on the light and continue the reaction for 4 hours, then take out 1.0ml from the remaining reaction solution and add it to the internal standard for nuclear magnetic analysis. Perform nuclear magnetic analysis every 4 hours until the reaction time reaches 24 h. The yield of **3** determined by  $^1\text{H}$  NMR using  $\text{CH}_2\text{Br}_2$  as an internal standard.

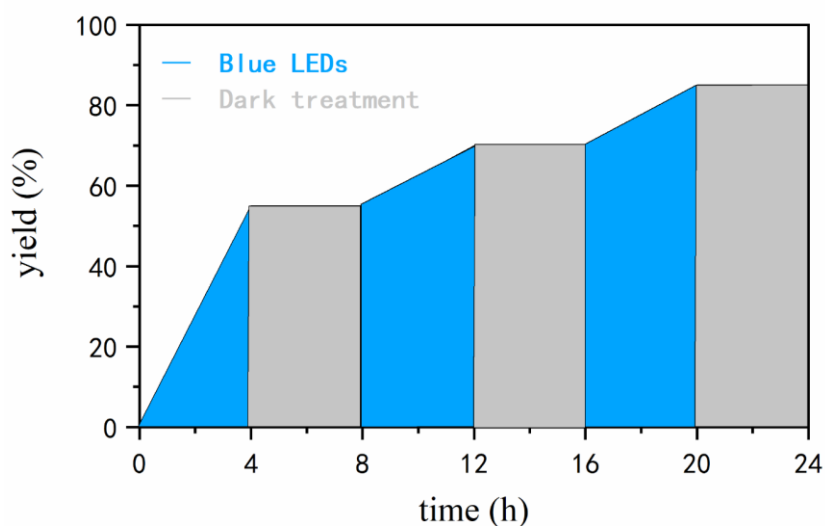

**Figure S2:** Time profile of the transformation with the light **ON/OFF** over time.

## 7. X-ray structure and data for **33**, **43**, **55**

### 7.1 Crystallographic data and molecular structure of **33** (CCDC: 2379567).

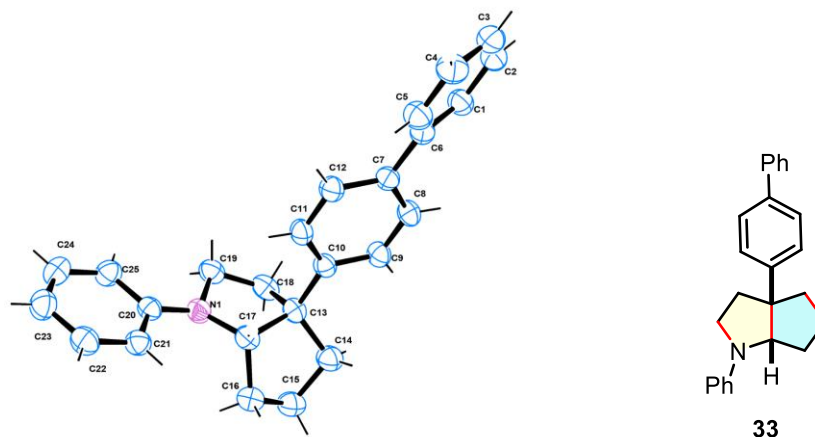

|                                                               |                |                    |                |
|---------------------------------------------------------------|----------------|--------------------|----------------|
| Bond precision:                                               | C-C = 0.0043 Å | Wavelength=0.71073 |                |
| Cell:                                                         | a=11.132 (5)   | b=12.623 (6)       | c=14.347 (6)   |
|                                                               | alpha=90       | beta=110.582 (14)  | gamma=90       |
| Temperature:                                                  | 300 K          |                    |                |
|                                                               | Calculated     | Reported           |                |
| Volume                                                        | 1887.4 (15)    | 1887.1 (15)        |                |
| Space group                                                   | P 21/n         | P 1 21/n 1         |                |
| Hall group                                                    | -P 2yn         | -P 2yn             |                |
| Moiety formula                                                | C25 H25 N      | C25 H25 N          |                |
| Sum formula                                                   | C25 H25 N      | C25 H25 N          |                |
| Mr                                                            | 339.46         | 339.46             |                |
| Dx, g cm-3                                                    | 1.195          | 1.195              |                |
| Z                                                             | 4              | 4                  |                |
| Mu (mm-1)                                                     | 0.068          | 0.068              |                |
| F000                                                          | 728.0          | 728.0              |                |
| F000'                                                         | 728.25         |                    |                |
| h, k, lmax                                                    | 13, 15, 17     | 13, 15, 17         |                |
| Nref                                                          | 3516           | 3502               |                |
| Tmin, Tmax                                                    | 0.984, 0.988   | 0.622, 0.746       |                |
| Tmin'                                                         | 0.984          |                    |                |
| Correction method= # Reported T Limits: Tmin=0.622 Tmax=0.746 |                |                    |                |
| AbsCorr = ?                                                   |                |                    |                |
| Data completeness=                                            | 0.996          | Theta(max)=        | 25.500         |
| R(reflections)=                                               | 0.0610 ( 2089) | wR2(reflections)=  |                |
| S =                                                           | 1.032          |                    | 0.1896 ( 3502) |
|                                                               | Npar= 235      |                    |                |

**Figure S3** ORTEP diagram of **33** with thermal displacement parameters drawn at 30% probability.

General procedure for crystal culture of **33**: To a test tube (15 mL) with added **33** (20 mg), dichloromethane (1.0 mL) was added slowly to make it dissolve completely. After it dissolved, a mixture of petroleum ether (2.0 mL) and EtOAc (3.0 mL) was added. Then, the test tube was sealed with a rubber stopper, and connected to air with a syringe needle. Finally, the tube was put in a dry and ventilated place to make the organic solvent to volatilize slowly. After a few days, the crystal of **33** was obtained. The X-ray crystal structure of **33** was shown in Figure S3.

## 7.2 Crystallographic data and molecular structure of **43**. (CCDC = 2379565).

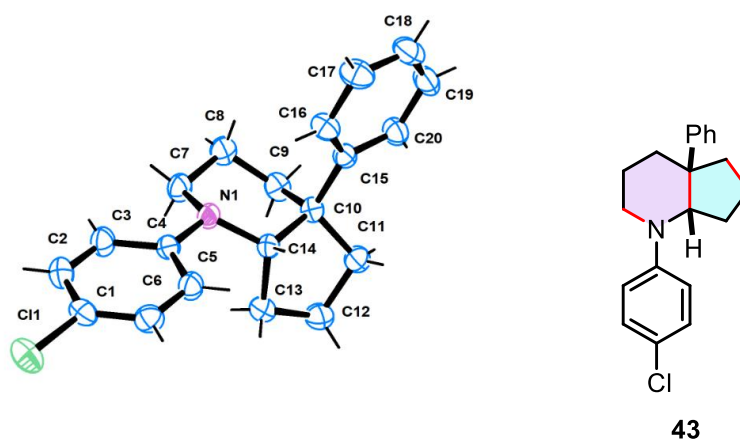

|                                                               |                                 |                  |                    |
|---------------------------------------------------------------|---------------------------------|------------------|--------------------|
| Bond precision:                                               | C-C = 0.0043 Å                  |                  | Wavelength=0.71073 |
| Cell:                                                         | a=11.132(5)                     | b=12.623(6)      | c=14.347(6)        |
|                                                               | alpha=90                        | beta=110.582(14) | gamma=90           |
| Temperature:                                                  | 300 K                           |                  |                    |
|                                                               | Calculated                      | Reported         |                    |
| Volume                                                        | 1887.4(15)                      | 1887.1(15)       |                    |
| Space group                                                   | P 21/n                          | P 1 21/n 1       |                    |
| Hall group                                                    | -P 2yn                          | -P 2yn           |                    |
| Moiety formula                                                | C25 H25 N                       | C25 H25 N        |                    |
| Sum formula                                                   | C25 H25 N                       | C25 H25 N        |                    |
| Mr                                                            | 339.46                          | 339.46           |                    |
| Dx, g cm-3                                                    | 1.195                           | 1.195            |                    |
| Z                                                             | 4                               | 4                |                    |
| Mu (mm-1)                                                     | 0.068                           | 0.068            |                    |
| F000                                                          | 728.0                           | 728.0            |                    |
| F000'                                                         | 728.25                          |                  |                    |
| h, k, lmax                                                    | 13, 15, 17                      | 13, 15, 17       |                    |
| Nref                                                          | 3516                            | 3502             |                    |
| Tmin, Tmax                                                    | 0.984, 0.988                    | 0.622, 0.746     |                    |
| Tmin'                                                         | 0.984                           |                  |                    |
| Correction method= # Reported T Limits: Tmin=0.622 Tmax=0.746 |                                 |                  |                    |
| AbsCorr = ?                                                   |                                 |                  |                    |
| Data completeness= 0.996                                      | Theta(max)= 25.500              |                  |                    |
| R(reflections)= 0.0610( 2089)                                 | wR2(reflections)= 0.1896( 3502) |                  |                    |
| S = 1.032                                                     | Npar= 235                       |                  |                    |

**Figure S4** ORTEP diagram of **43** with thermal displacement parameters drawn at 30% probability.

General procedure for crystal culture of **43**: To a test tube (15 mL) with added **43** (20 mg), dichloromethane (1.0 mL) was added slowly to make it dissolve completely. After it dissolved, a mixture of petroleum ether (2.0 mL) and EtOAc (3.0 mL) was added. Then, the test tube was sealed with a rubber stopper, and connected to air with a syringe needle. Finally, the tube was put in a dry and ventilated place to make the organic solvent to volatilize slowly. After a few days, the crystal of **43** was obtained. The X-ray crystal structure of **43** was shown in Figure S4.

### 7.3 Crystallographic data and molecular structure of **55**. (CCDC = 2379566).

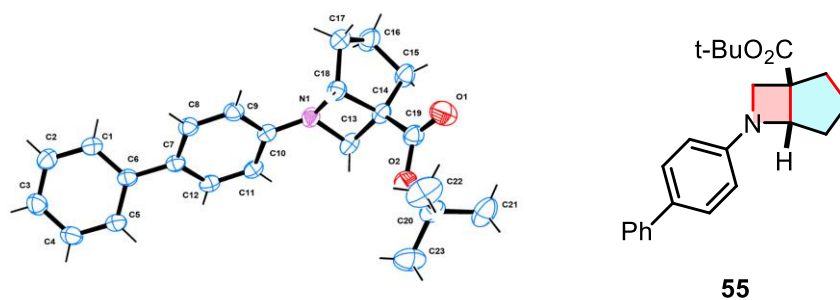

|                                                               |                |                    |                    |
|---------------------------------------------------------------|----------------|--------------------|--------------------|
| Bond precision:                                               | C-C = 0.0023 Å |                    | Wavelength=1.54178 |
| Cell:                                                         | a=6.3681(1)    | b=23.3400(4)       | c=13.4530(2)       |
|                                                               | alpha=90       | beta=97.905(1)     | gamma=90           |
| Temperature:                                                  | 273 K          |                    |                    |
|                                                               | Calculated     | Reported           |                    |
| Volume                                                        | 1980.54(6)     | 1980.54(5)         |                    |
| Space group                                                   | P 21/c         | P 1 21/c 1         |                    |
| Hall group                                                    | -P 2ybc        | -P 2ybc            |                    |
| Moiety formula                                                | C23 H27 N O2   | C23 H27 N O2       |                    |
| Sum formula                                                   | C23 H27 N O2   | C23 H27 N O2       |                    |
| Mr                                                            | 349.46         | 349.45             |                    |
| Dx, g cm-3                                                    | 1.172          | 1.172              |                    |
| Z                                                             | 4              | 4                  |                    |
| Mu (mm-1)                                                     | 0.579          | 0.579              |                    |
| F000                                                          | 752.0          | 752.0              |                    |
| F000'                                                         | 754.08         |                    |                    |
| h, k, lmax                                                    | 7, 28, 16      | 7, 28, 16          |                    |
| Nref                                                          | 3630           | 3586               |                    |
| Tmin, Tmax                                                    | 0.891, 0.901   | 0.518, 0.753       |                    |
| Tmin'                                                         | 0.891          |                    |                    |
| Correction method= # Reported T Limits: Tmin=0.518 Tmax=0.753 |                |                    |                    |
| AbsCorr = MULTI-SCAN                                          |                |                    |                    |
| Data completeness=                                            | 0.988          | Theta(max)= 68.290 |                    |
| R(reflections)=                                               | 0.0440( 3201)  | wR2(reflections)=  |                    |
|                                                               |                | 0.1204( 3586)      |                    |
| S =                                                           | 1.031          | Npar= 238          |                    |

**Figure S5** ORTEP diagram of **55** with thermal displacement parameters drawn at 30% probability.

General procedure for crystal culture of **55**: To a test tube (15 mL) with added **55** (20 mg), dichloromethane (1.0 mL) was added slowly to make it dissolve completely. After it dissolved, a mixture of petroleum ether (2.0 mL) and EtOAc (3.0 mL) was added. Then, the test tube was sealed with a rubber stopper, and connected to air with a syringe needle. Finally, the tube was put in a dry and ventilated place to make the organic solvent to volatilize slowly. After a few days, the crystal of **55** was obtained. The X-ray crystal structure of **55** was shown in Figure S5.

## 8. References

- [1] (a) Maity, S., Zhu, M., Shinabery, R. S. & Zheng, N. Intermolecular [3+2] Cycloaddition of Cyclopropylamines with Olefins by Visible-Light Photocatalysis. *Angew Chem Int Ed* **51**, 222–226 (2011). (b) Muriel, B., Gagnebin, A. & Waser, J. Synthesis of Bicyclo[3.1.0]hexanes by (3 + 2) Annulation of Cyclopropenes with Aminocyclopropanes. *Chem. Sci.* **10**, 10716–10722 (2019). (c) Kuang, Y., Ning, Y., Zhu, J. & Wang, Y. Dirhodium(II)-Catalyzed (3 + 2) Cycloaddition of the *N*-Arylamino-cyclopropane with Alkene Derivatives. *Org. Lett.* **20**, 2693–2697 (2018). (d) Cui, W. & Loeppky, R. N. The Synthesis of *N*-Arylcyclopropylamines via Palladium-catalyzed C–N Bond Formation. *Tetrahedron* **57**, 2953–2956 (2001). (e) Lv, S., Xu, W. F., Yang, T. Y., Lan, M. X., Xiao, R. X., Mou, X. Q., Chen, Y. Z. and Cui, B. D. Iron(II)-Catalyzed Radical [3 + 2] Cyclization of *N*-Aryl Cyclopropylamines for the Synthesis of Polyfunctionalized Cyclopentylamines. *Org. Lett.* **26**, 3151–3157 (2024).
- [2] Li, H., Zhang, Y., Yang, X., Deng, Z., Zhu, Z., Zhou, P., Ouyang, X., Yuan, Y., Chen, X., Yang, L., Liu, M. & Shu, C. Synthesis of Multifluoromethylated  $\gamma$ -Sultines by a Photoinduced Radical Addition–Polar Cyclization. *Angew. Chem. Int. Ed.* **62**, e202300159 (2023).
- [3] Pasini, D., Klopp, J. M. & Fréchet, J. M. J. Design, Synthesis, and Characterization of Carbon-Rich Cyclopolymers for 193 Nm Microlithography. *Chem. Mater.* **13**, 4136–4146 (2001).



## 9. NMR spectra of the products

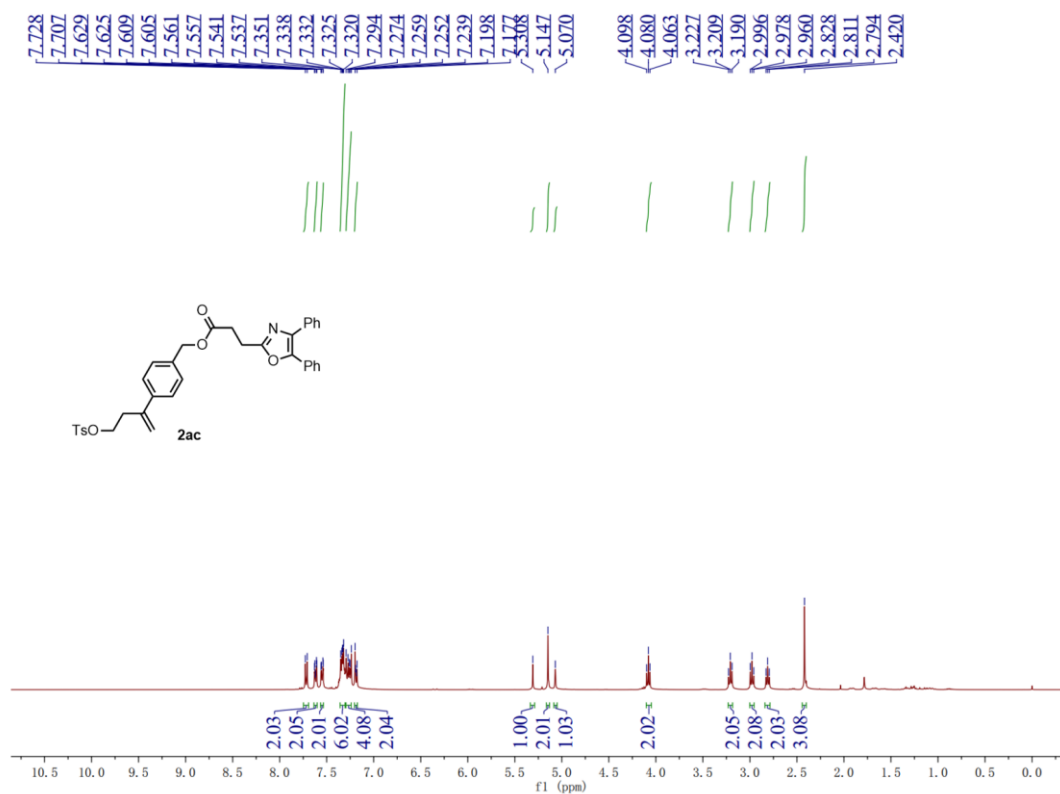

<sup>1</sup>H NMR Spectrum of Compound **2ac** (400 MHz, CDCl<sub>3</sub>)

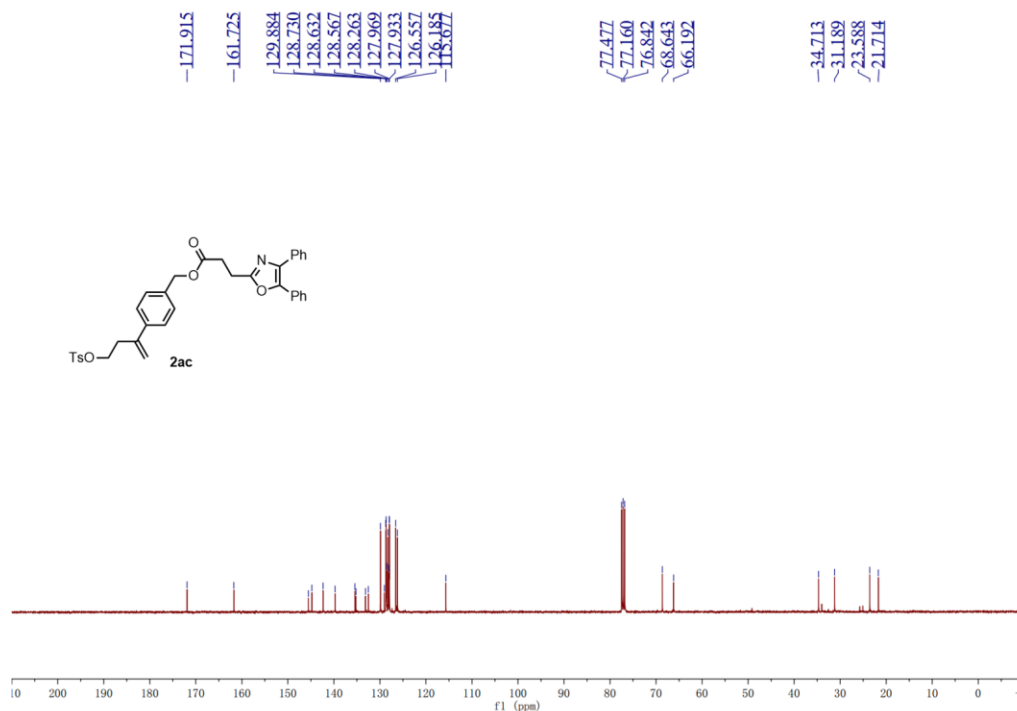

<sup>13</sup>C{<sup>1</sup>H} NMR Spectrum of Compound **2ac** (100 MHz, CDCl<sub>3</sub>)

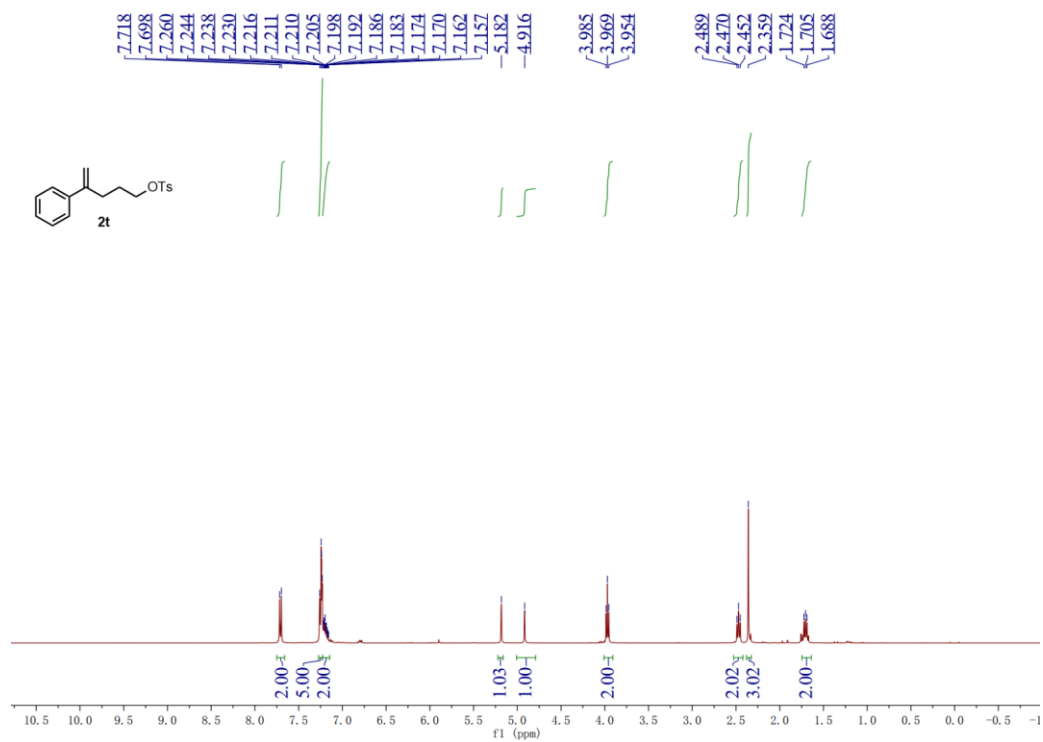

<sup>1</sup>H NMR Spectrum of Compound **2t** (400 MHz, CDCl<sub>3</sub>)

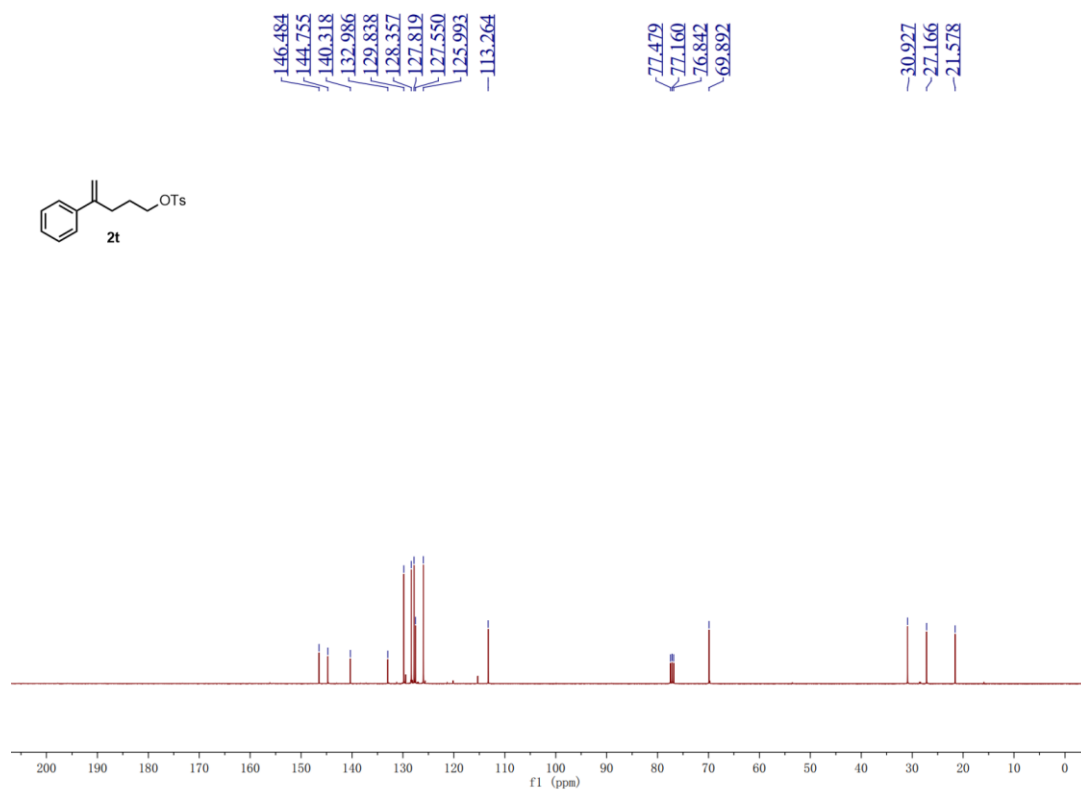

$^{13}\text{C}\{^1\text{H}\}$  NMR Spectrum of Compound **2t** (100 MHz,  $\text{CDCl}_3$ )

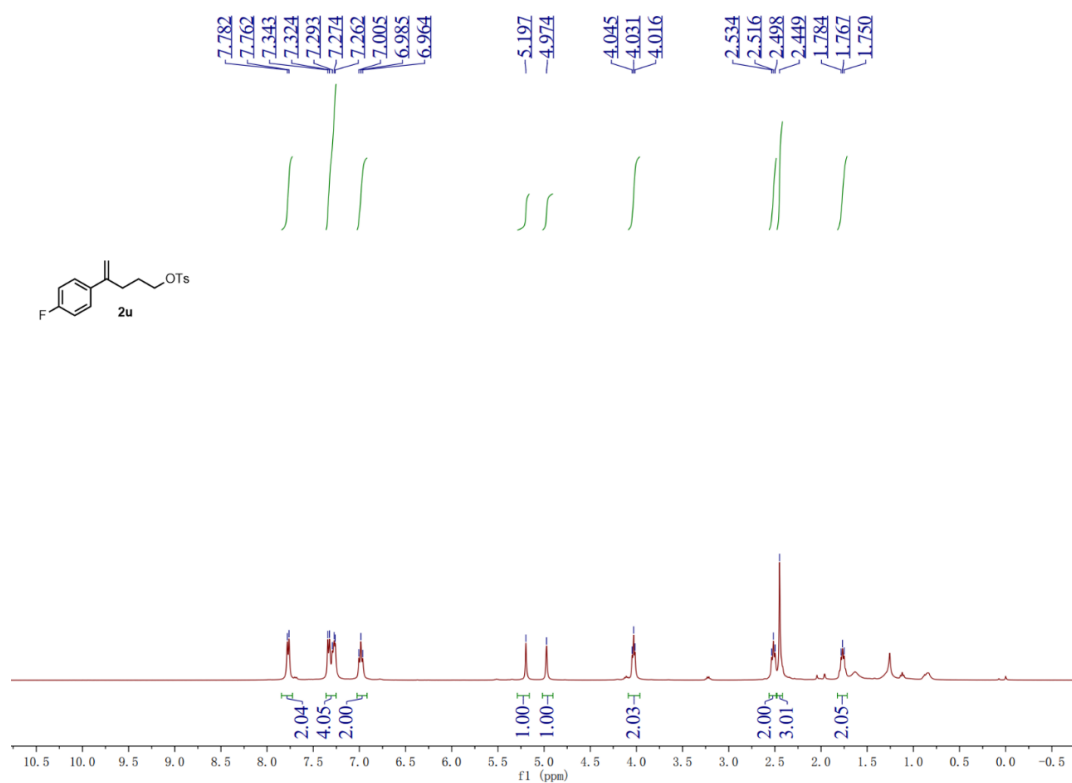

$^1\text{H}$  NMR Spectrum of Compound **2u** (400 MHz,  $\text{CDCl}_3$ )

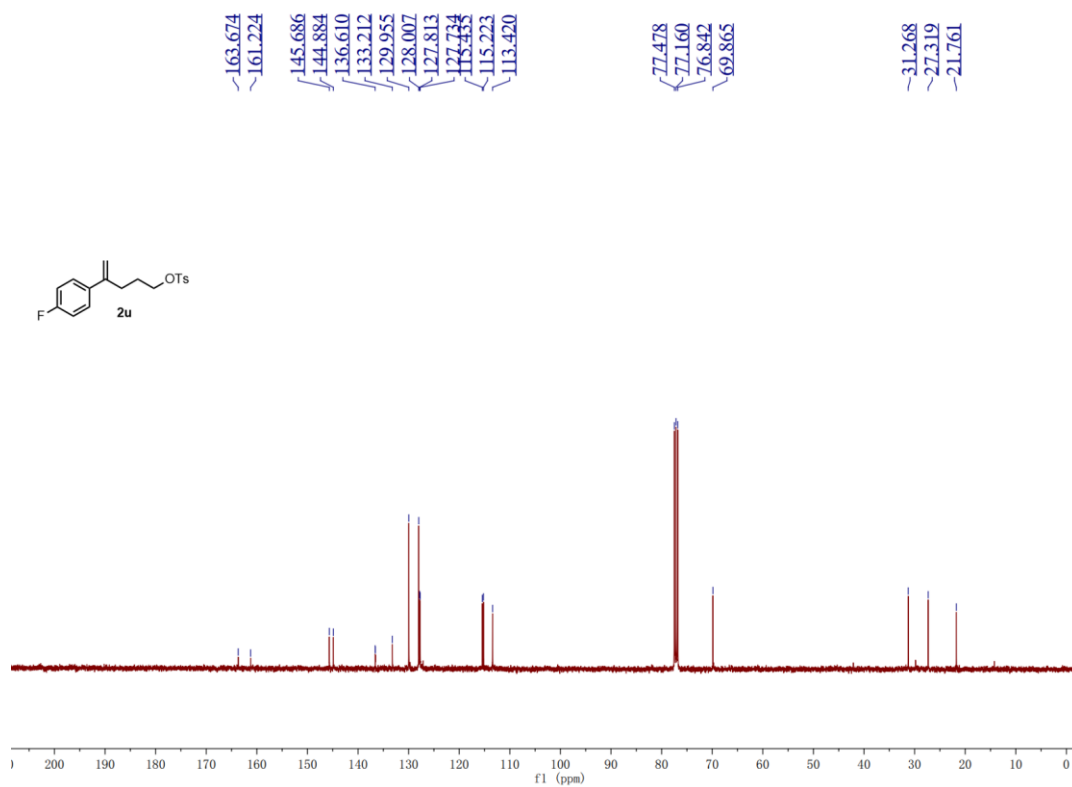

$^{13}\text{C}\{^1\text{H}\}$  NMR Spectrum of Compound **2u** (100 MHz,  $\text{CDCl}_3$ )

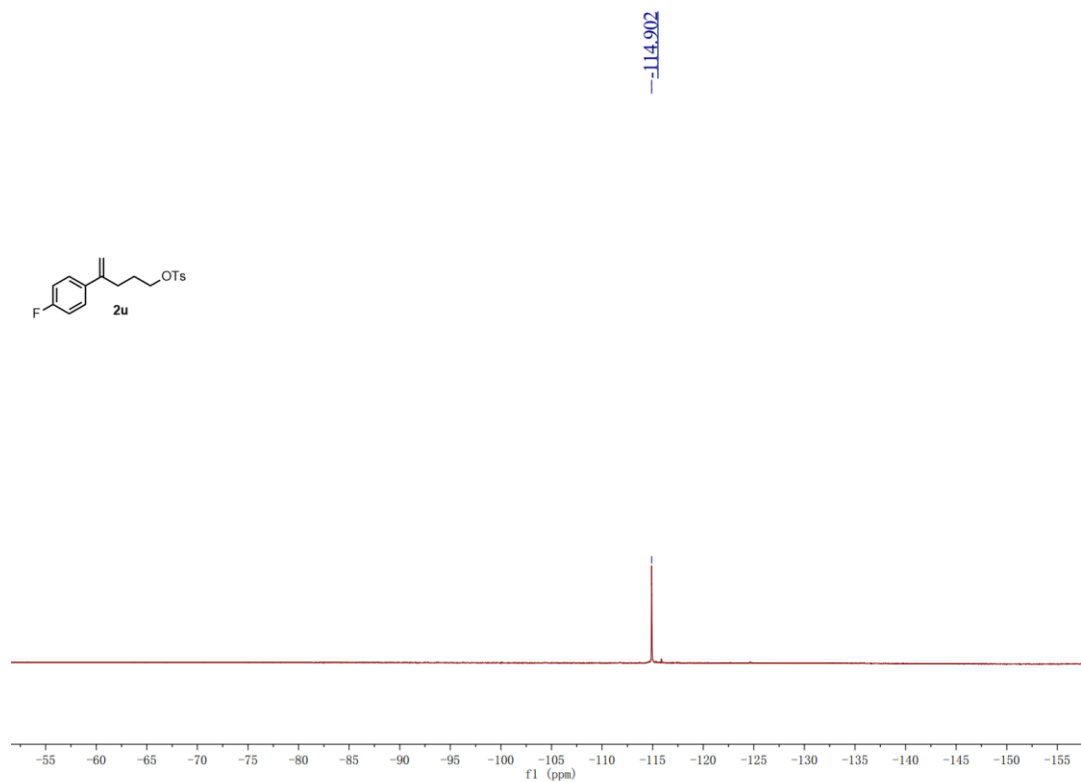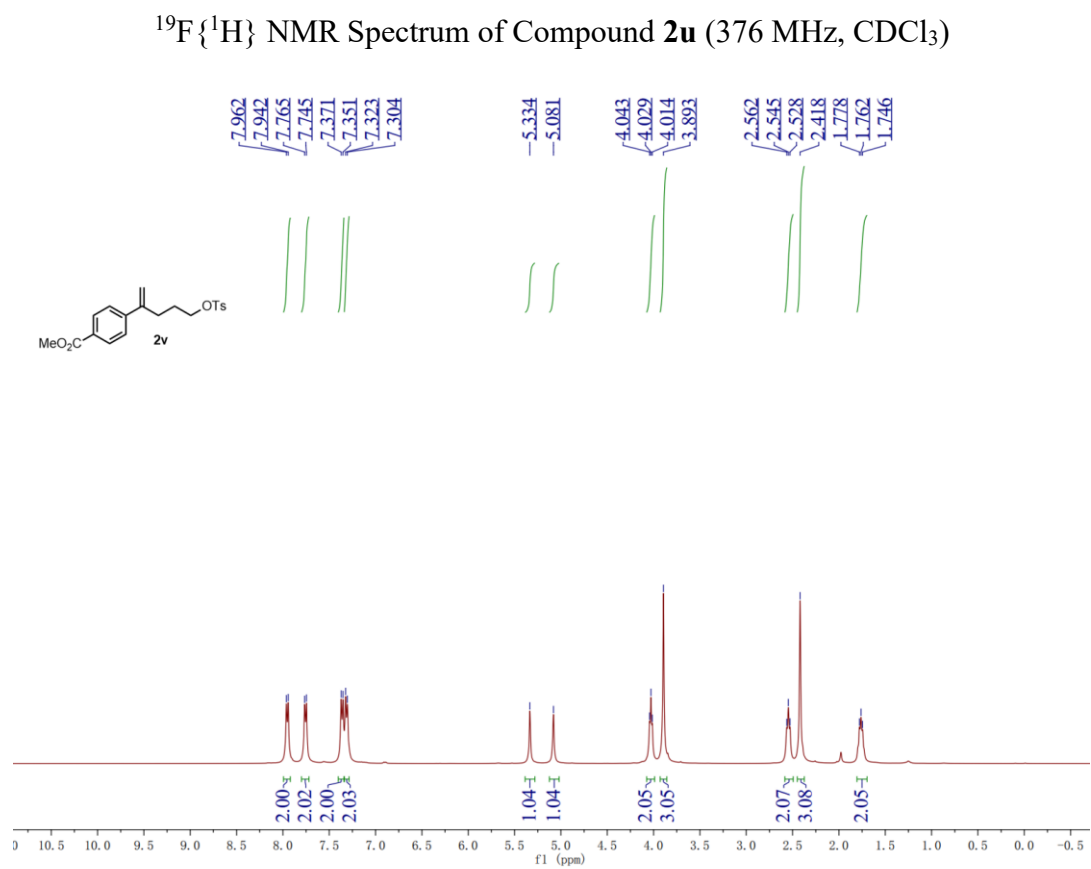

$^1\text{H}$  NMR Spectrum of Compound **2v** (400 MHz,  $\text{CDCl}_3$ )

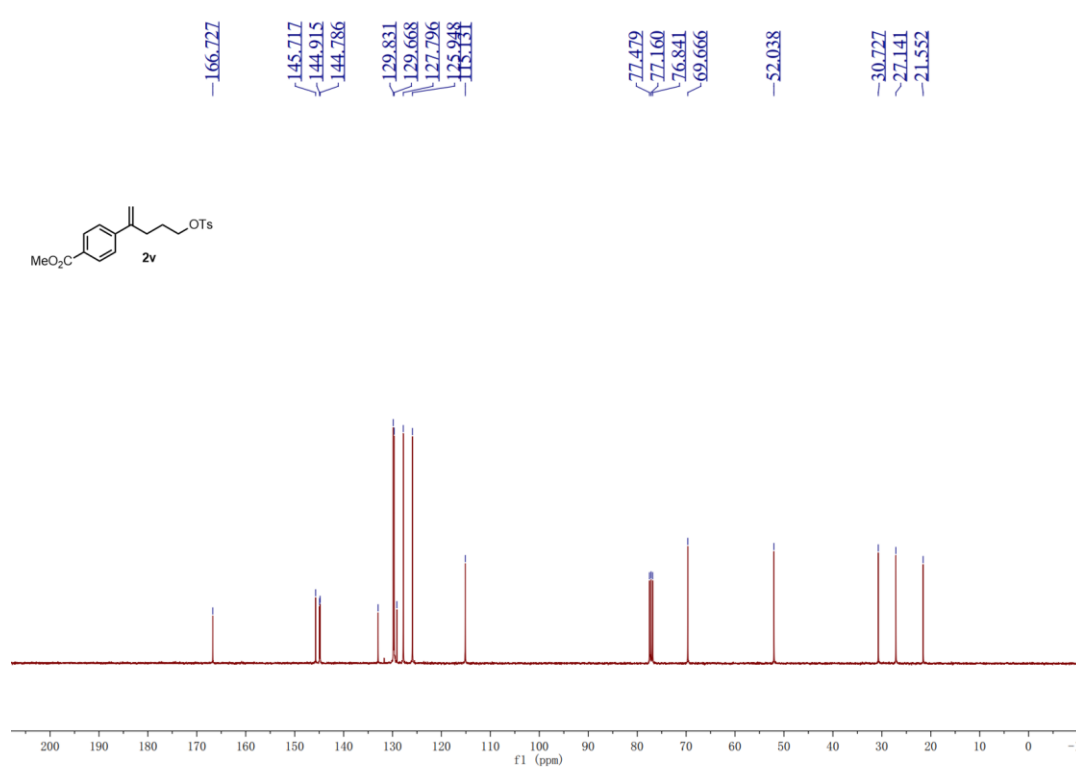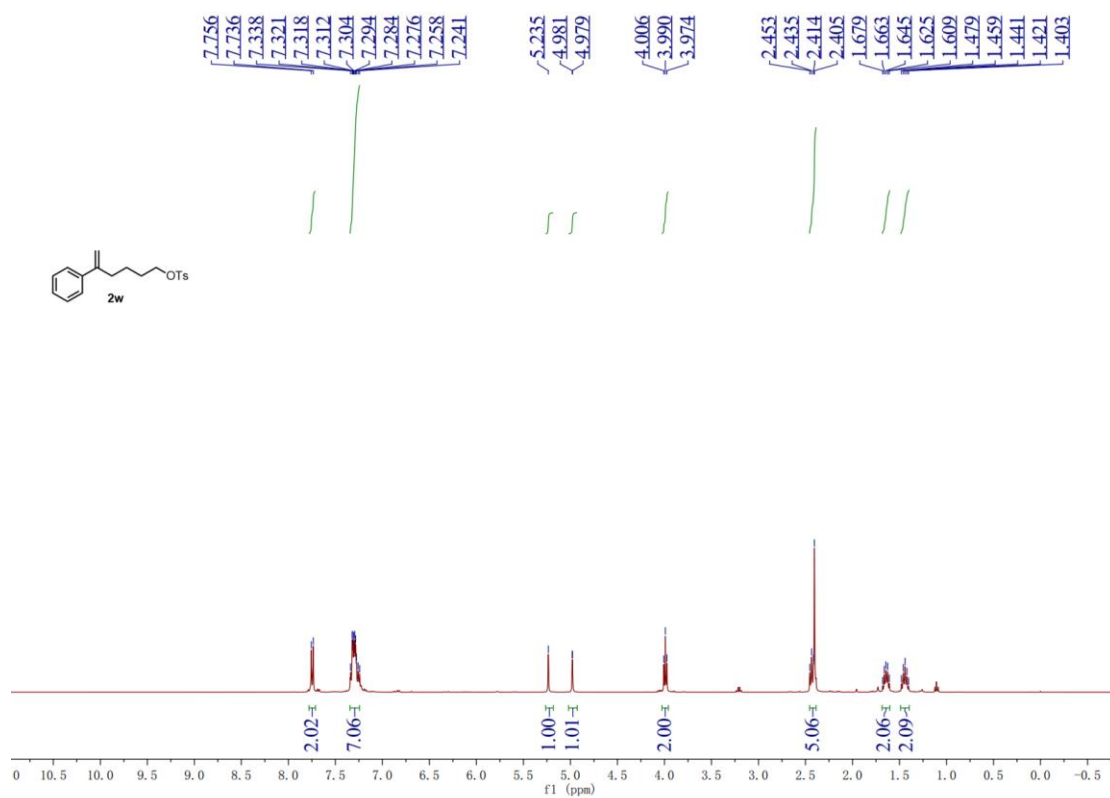

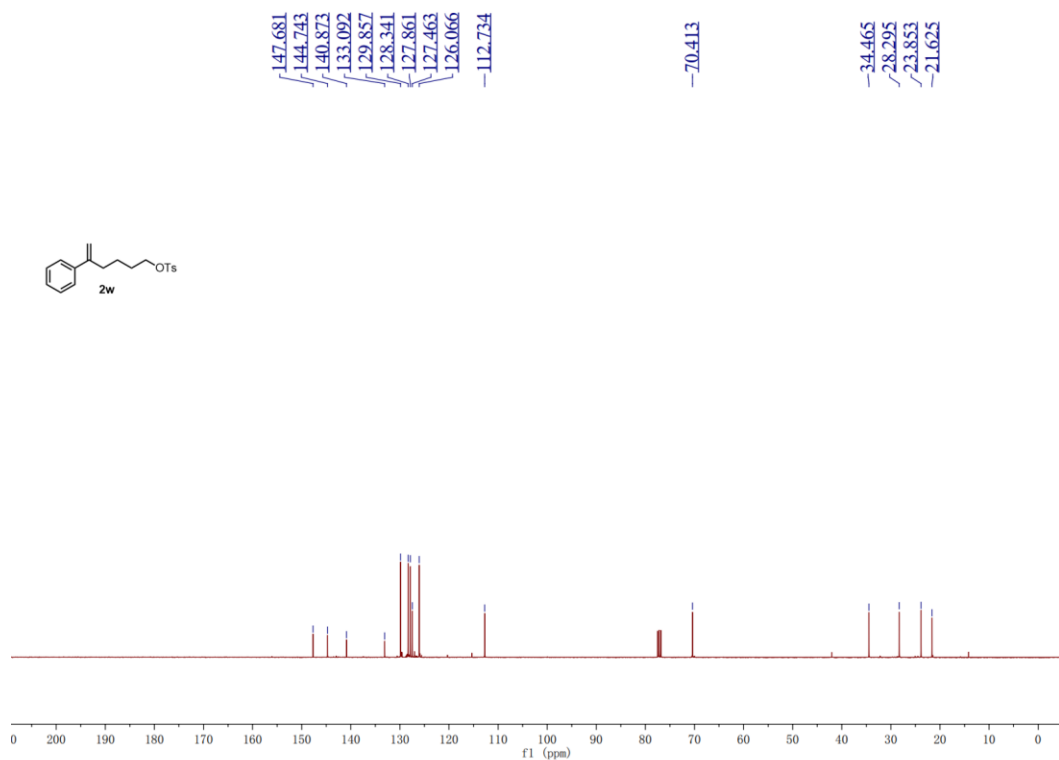

<sup>13</sup>C{<sup>1</sup>H} NMR Spectrum of Compound **2w** (100 MHz, CDCl<sub>3</sub>)

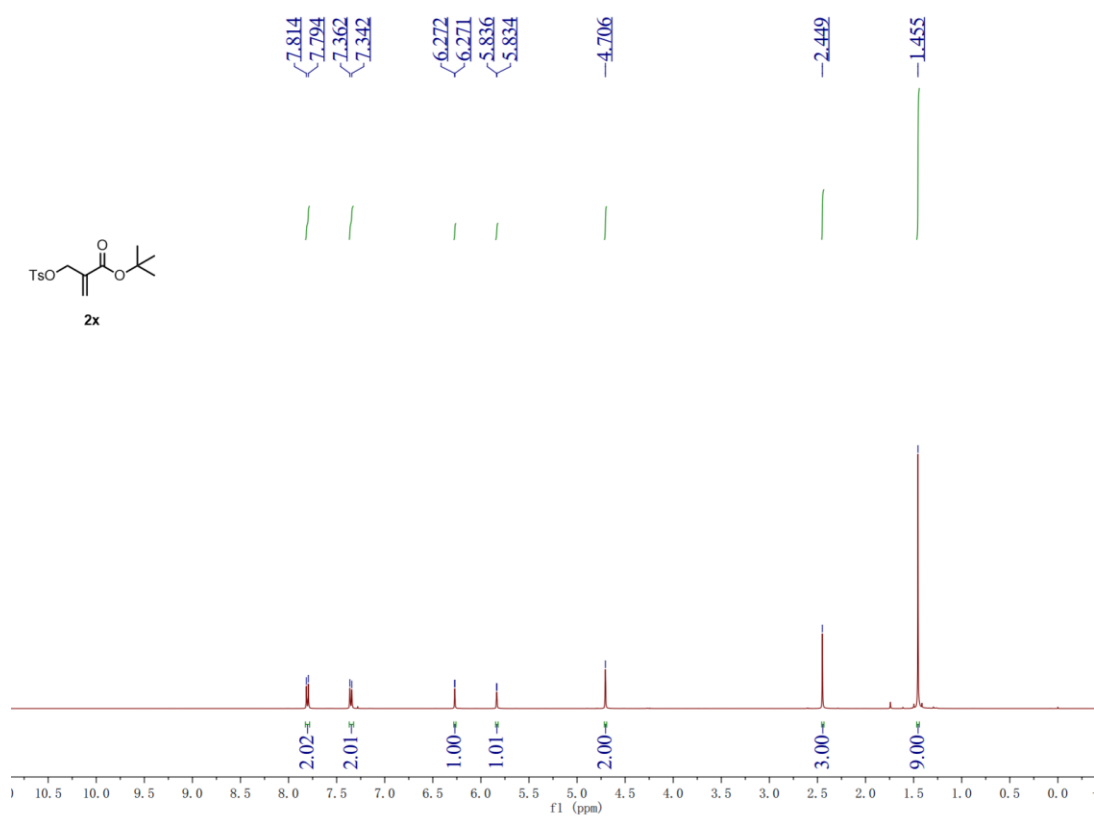

<sup>1</sup>H NMR Spectrum of Compound **2x** (400 MHz, CDCl<sub>3</sub>)

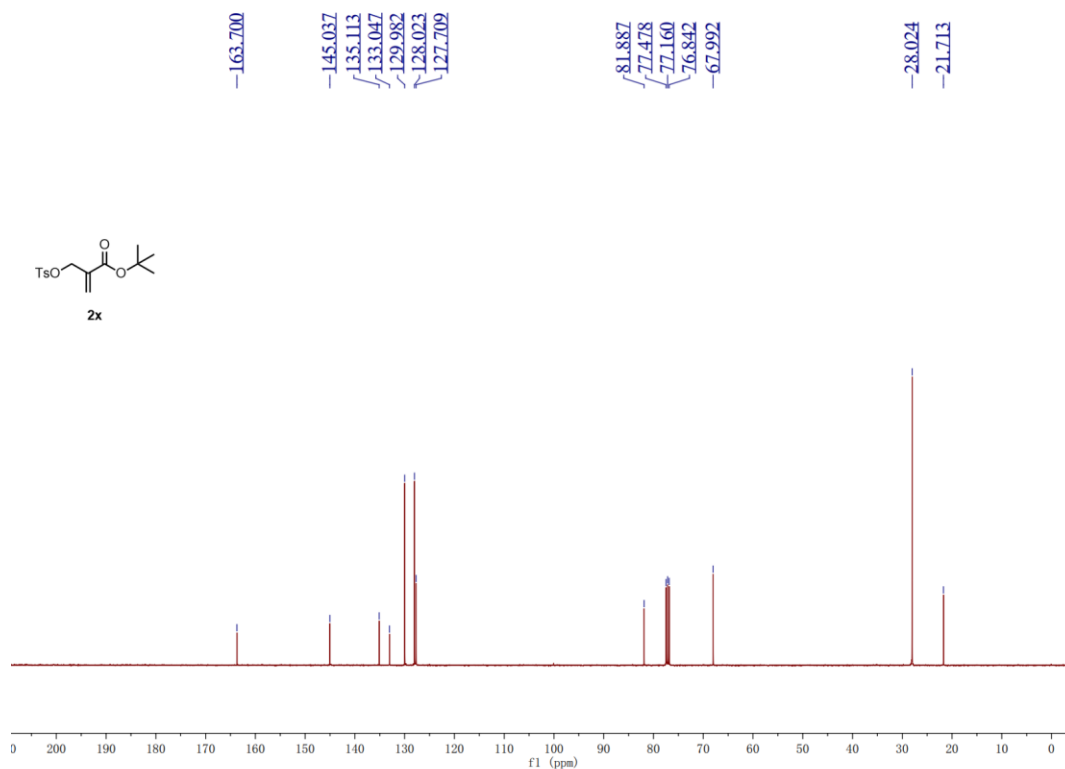

**<sup>13</sup>C {<sup>1</sup>H} NMR Spectrum of Compound 2x (100 MHz, CDCl<sub>3</sub>)**

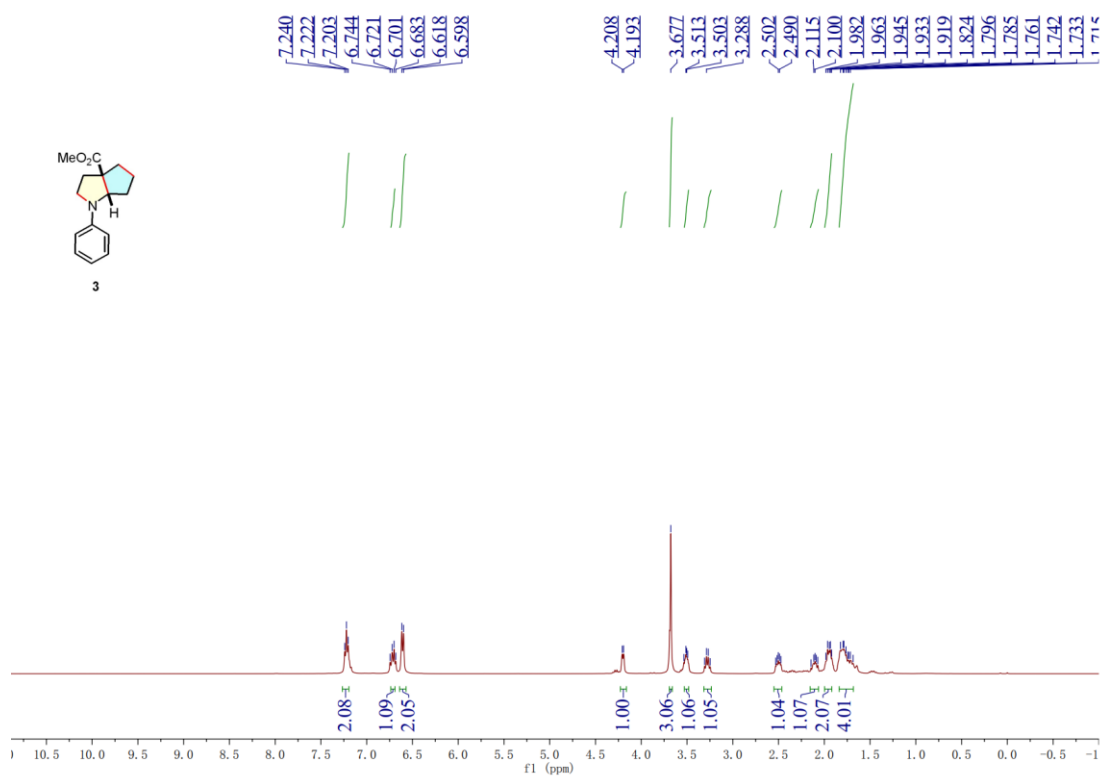

**<sup>1</sup>H NMR Spectrum of Compound 3 (400 MHz, CDCl<sub>3</sub>)**

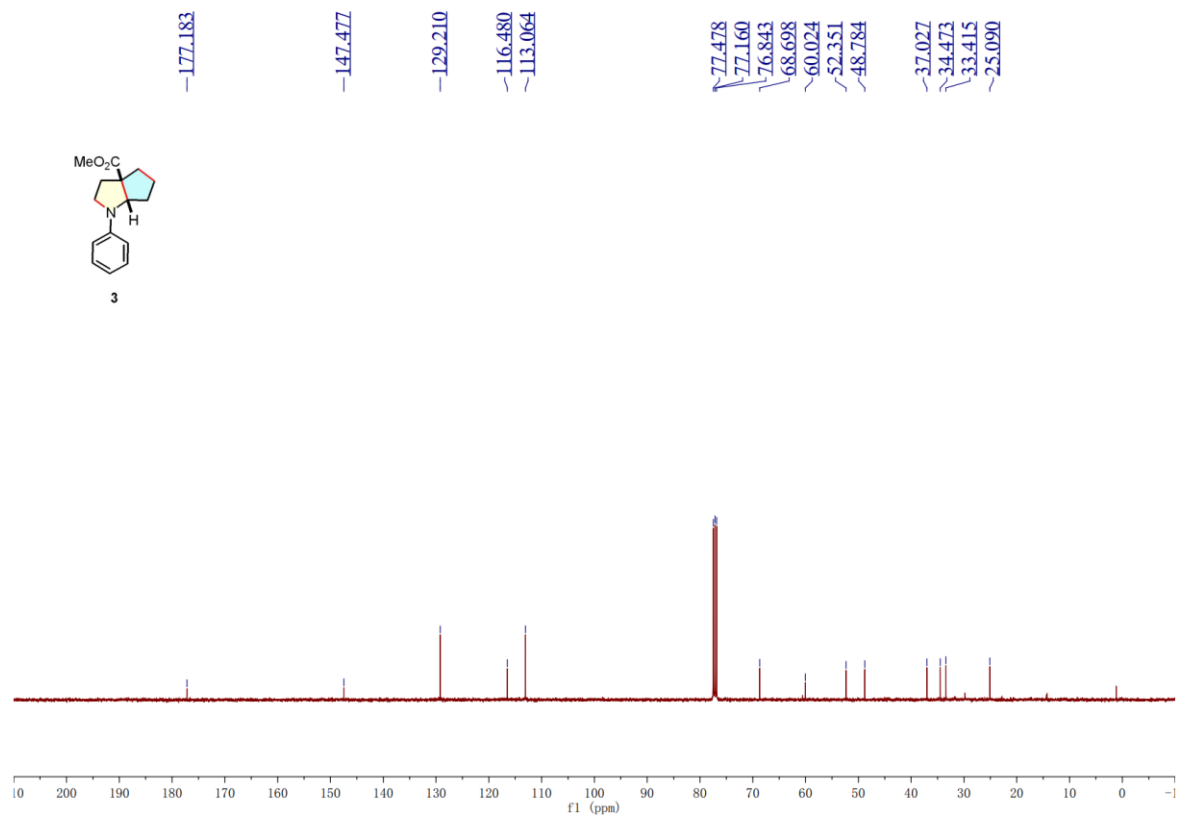

<sup>13</sup>C {<sup>1</sup>H} NMR Spectrum of Compound **3** (100 MHz, CDCl<sub>3</sub>)

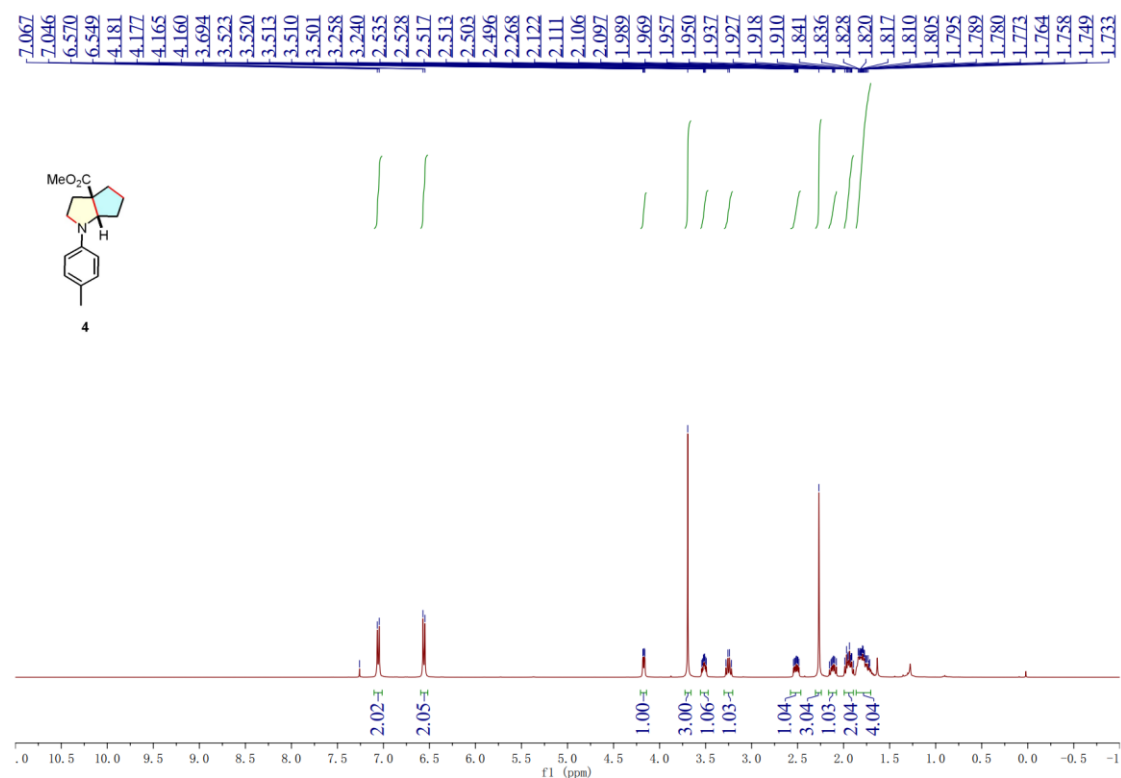

<sup>1</sup>H NMR Spectrum of Compound **4** (400 MHz, CDCl<sub>3</sub>)



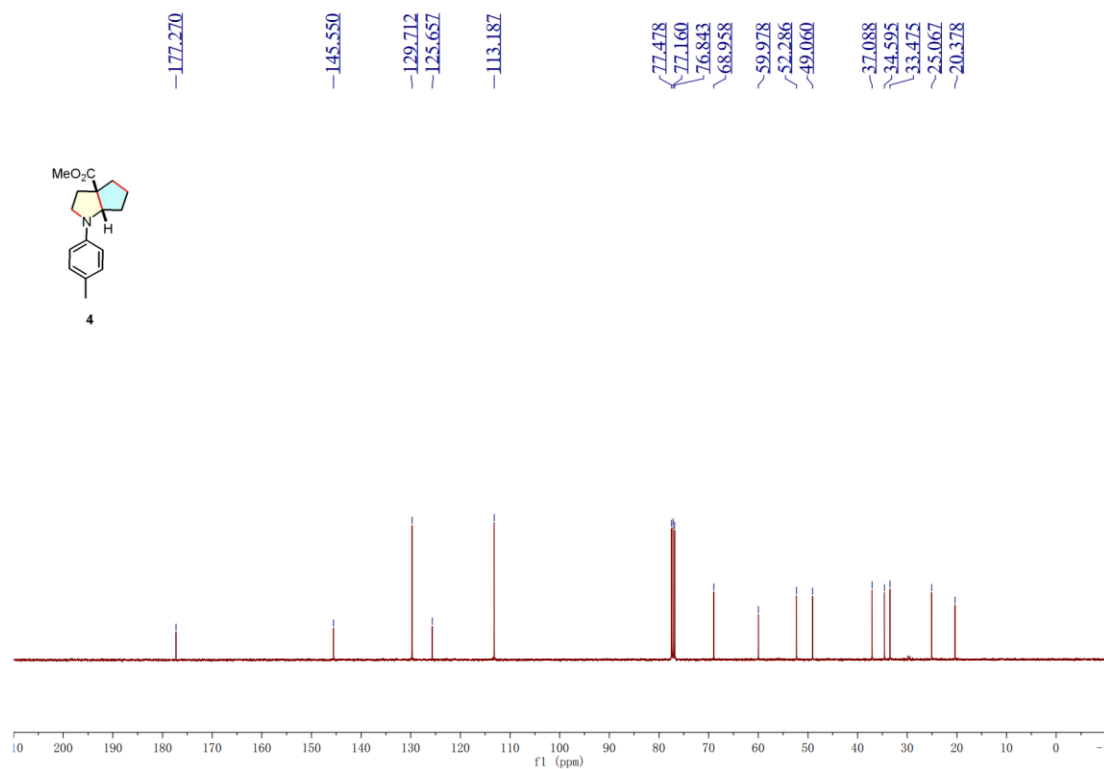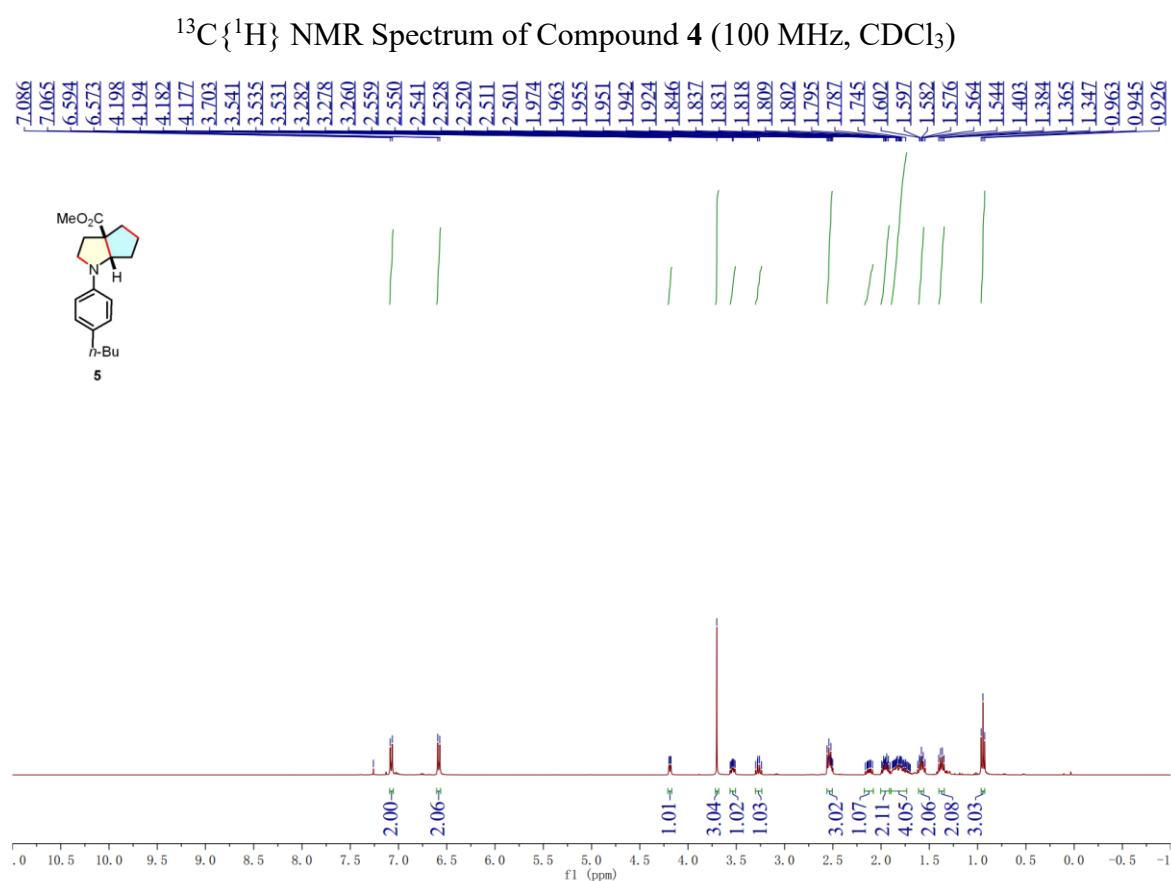

<sup>1</sup>H NMR Spectrum of Compound 5 (400 MHz, CDCl<sub>3</sub>)

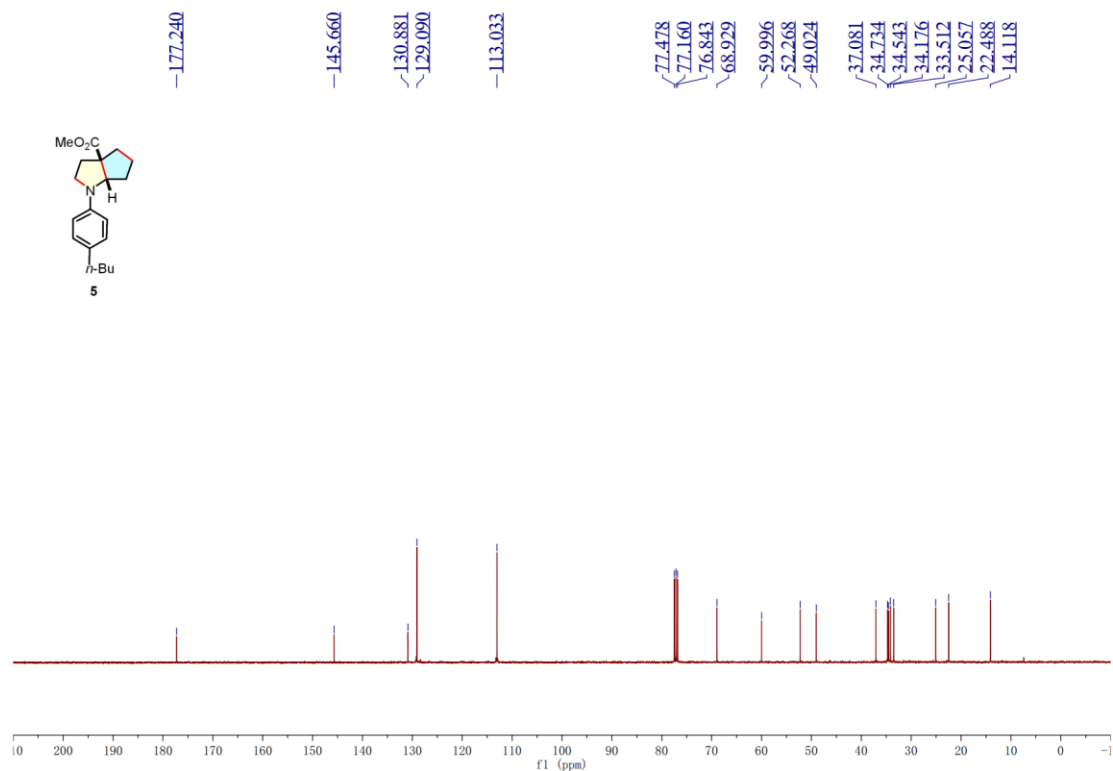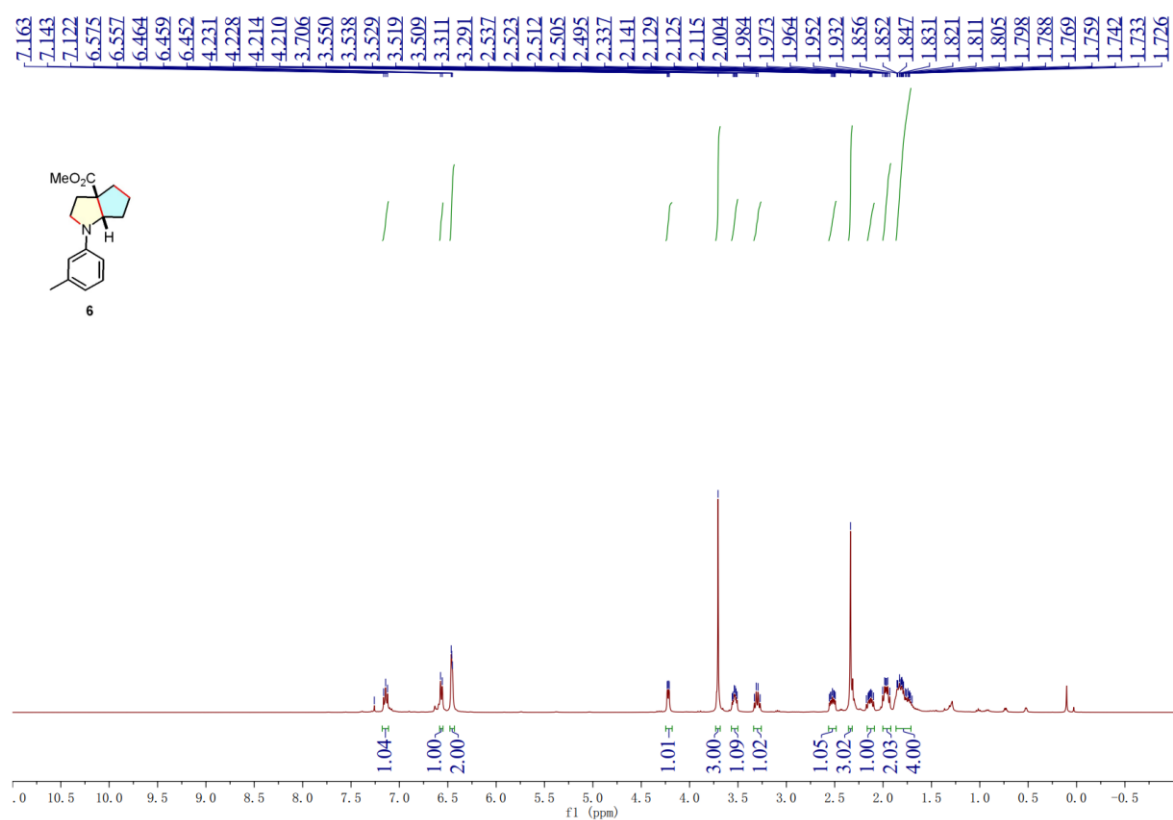

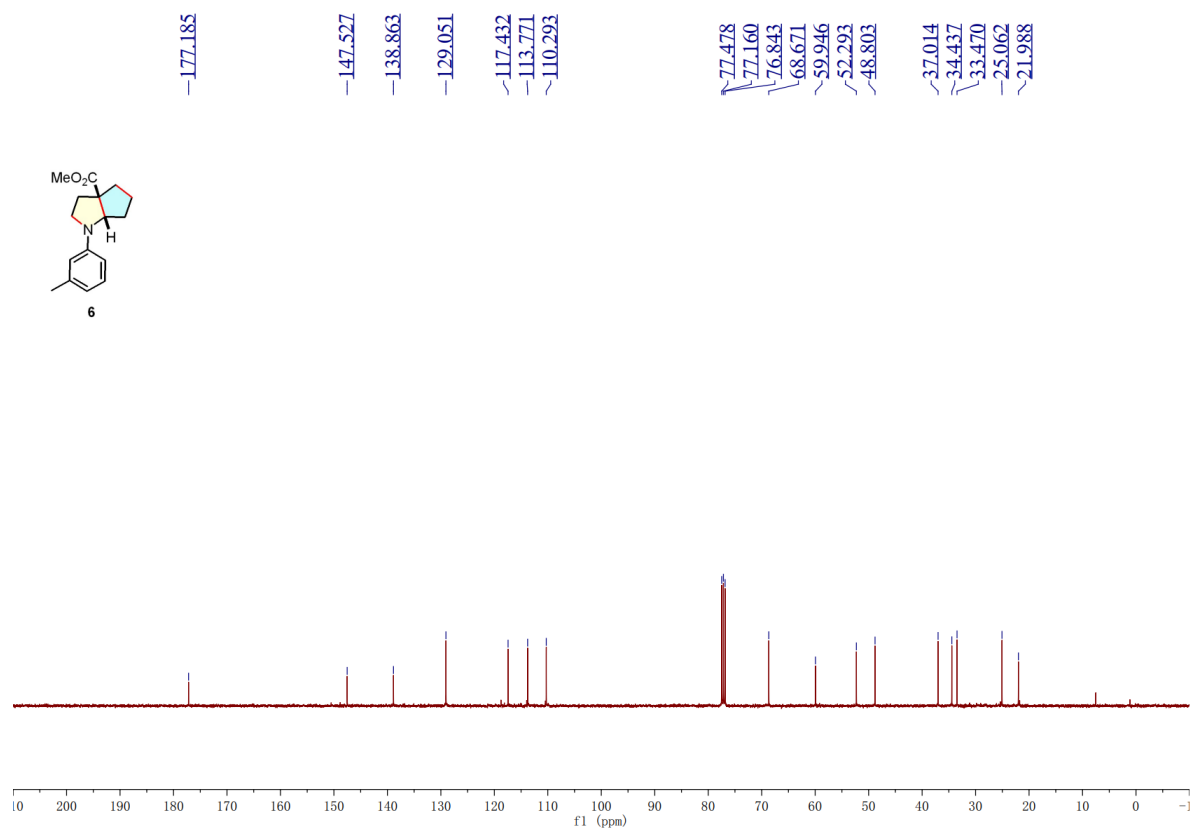

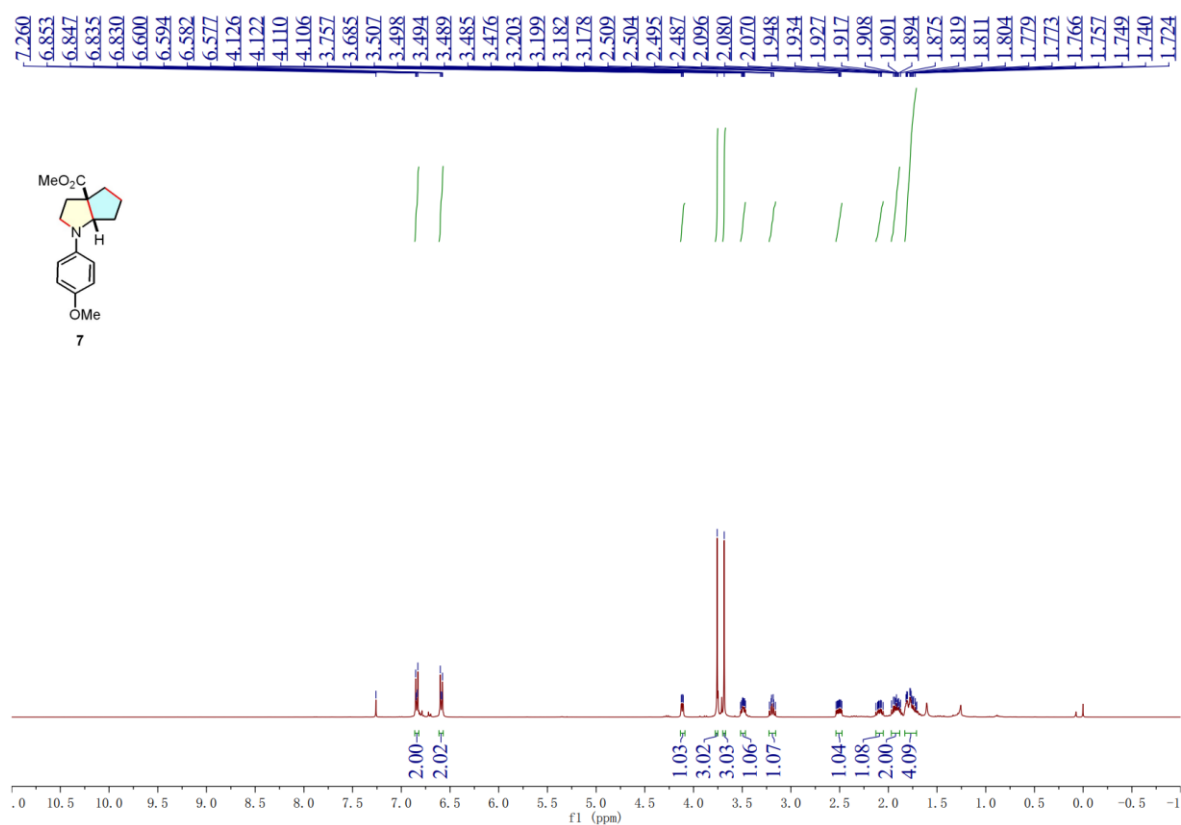

<sup>1</sup>H NMR Spectrum of Compound 7 (400 MHz, CDCl<sub>3</sub>)

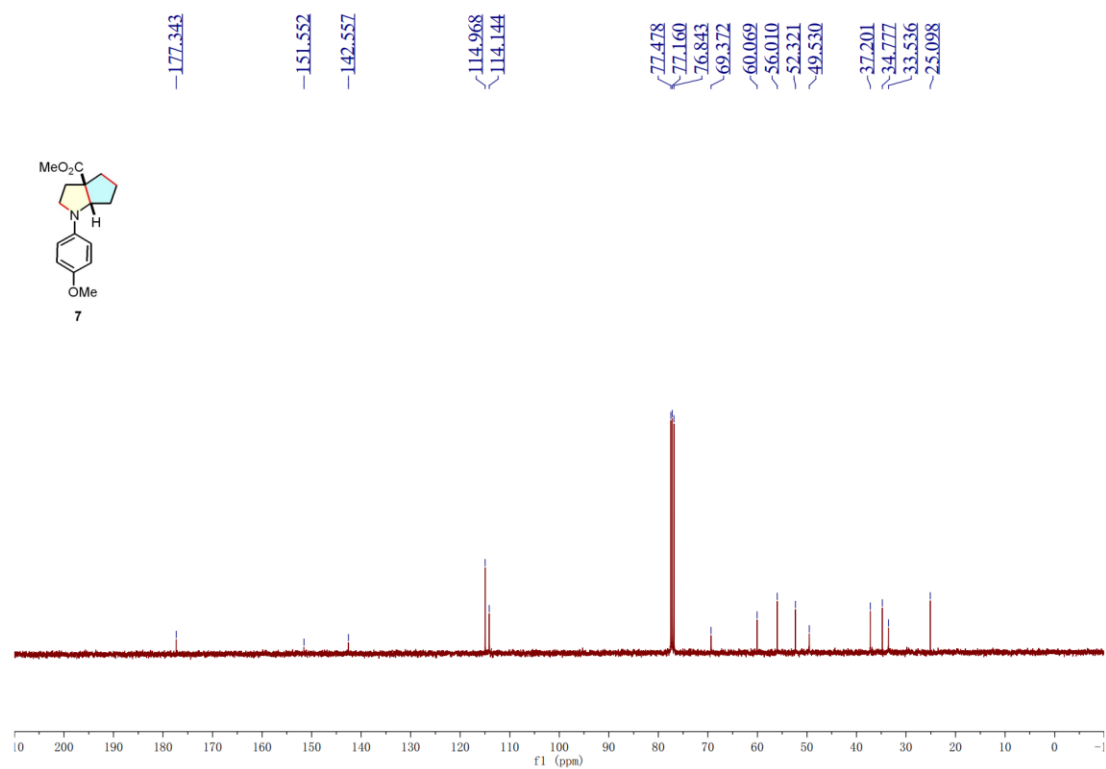

<sup>13</sup>C{<sup>1</sup>H} NMR Spectrum of Compound 7 (100 MHz, CDCl<sub>3</sub>)

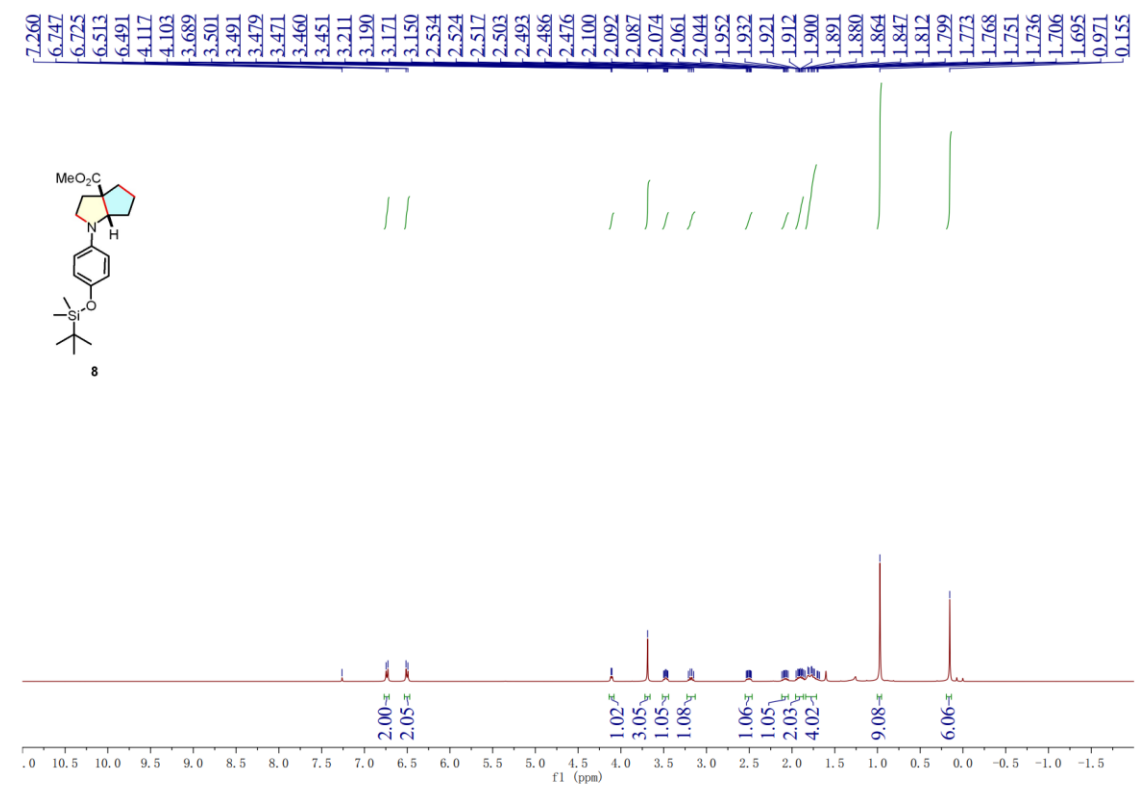

**<sup>1</sup>H NMR Spectrum of Compound **8** (400 MHz, CDCl<sub>3</sub>)**

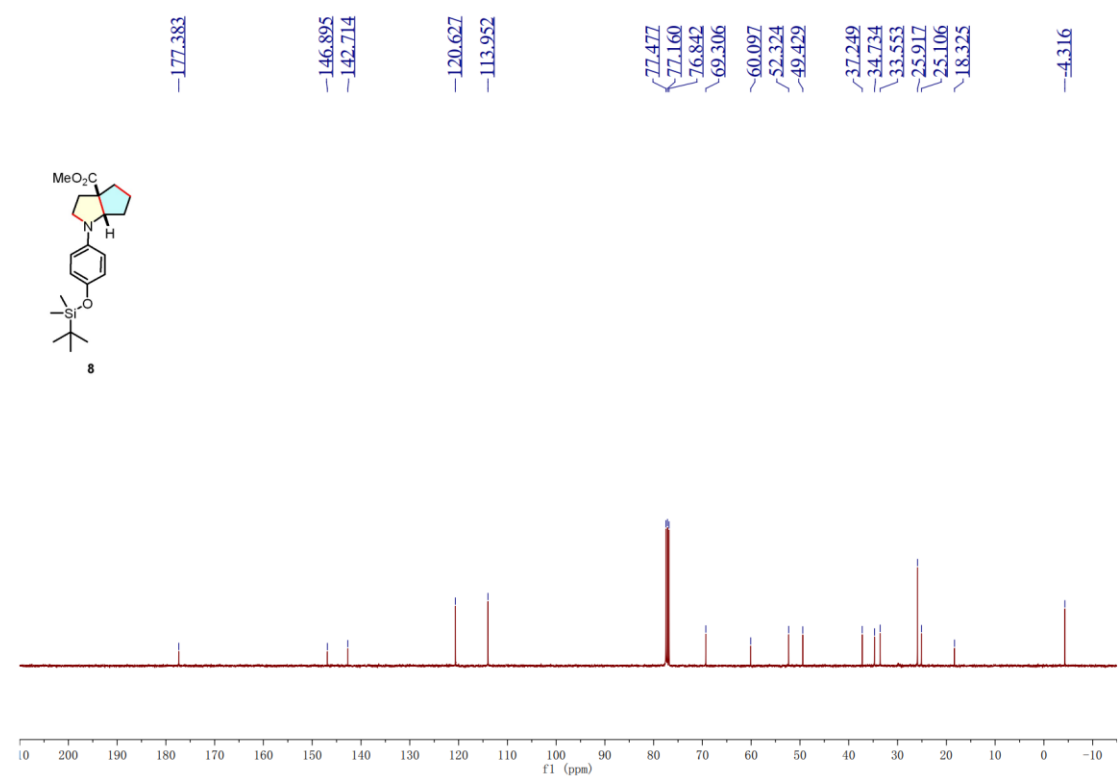

**<sup>13</sup>C{<sup>1</sup>H} NMR Spectrum of Compound **8** (100 MHz, CDCl<sub>3</sub>)**

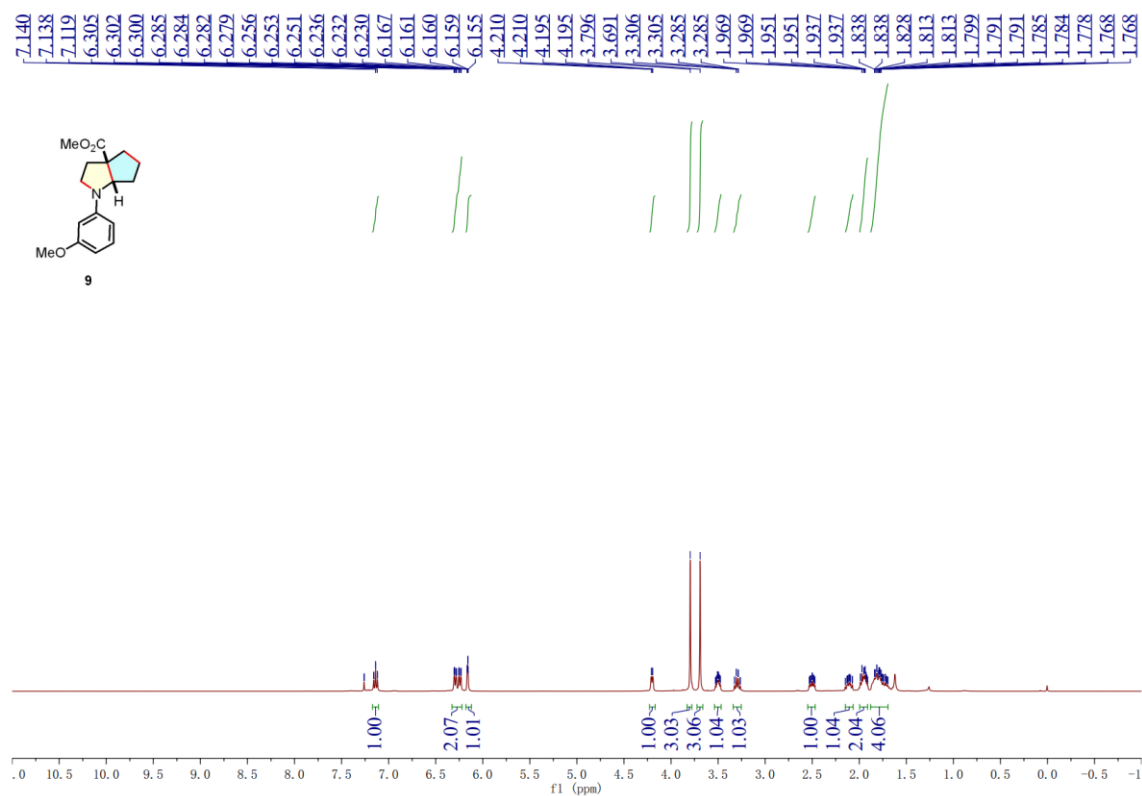

**<sup>1</sup>H NMR Spectrum of Compound 9 (400 MHz, CDCl<sub>3</sub>)**

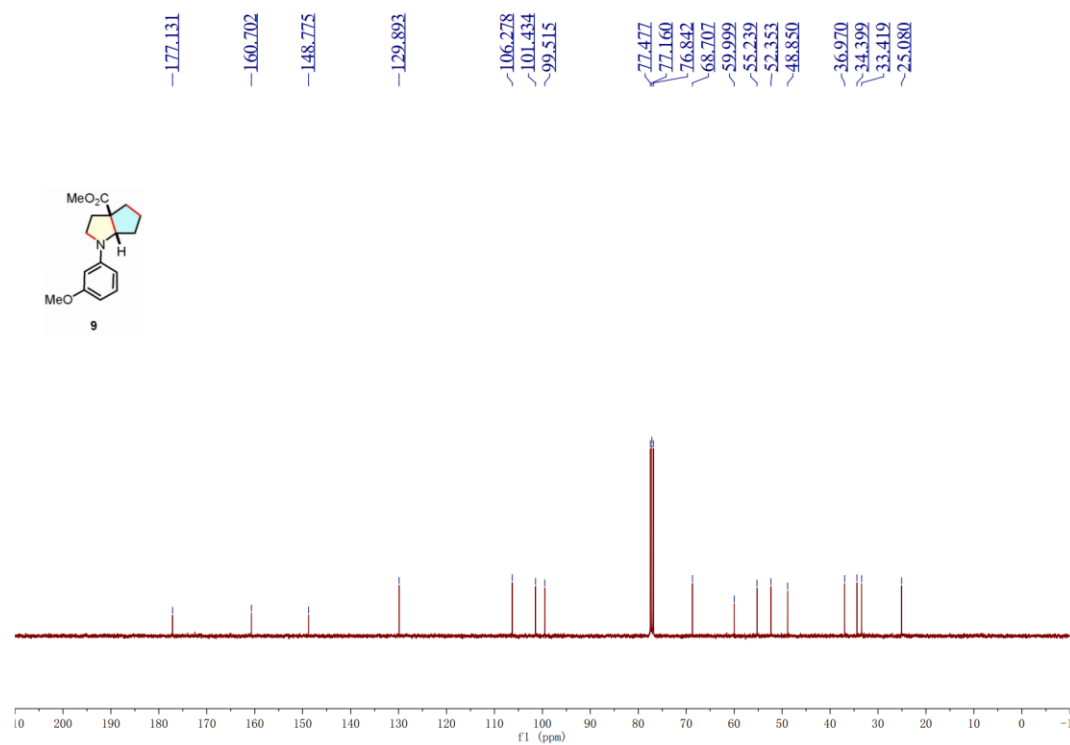

**<sup>13</sup>C {<sup>1</sup>H} NMR Spectrum of Compound 9 (100 MHz, CDCl<sub>3</sub>)**

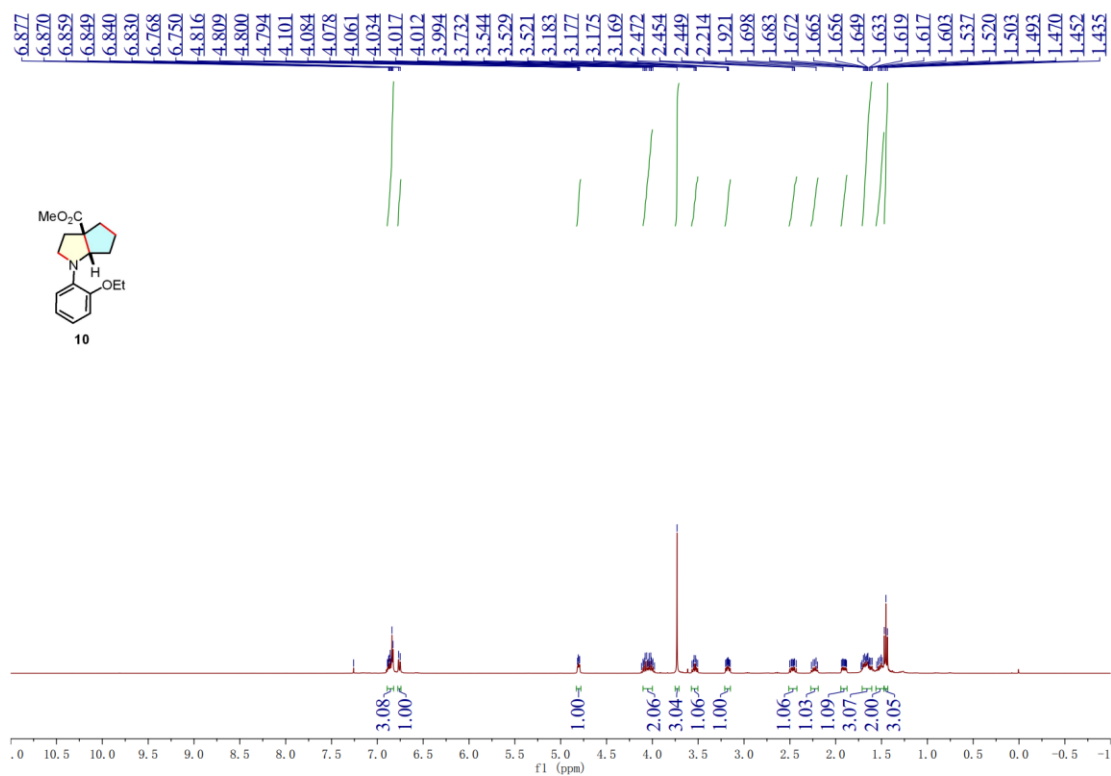

**<sup>1</sup>H NMR Spectrum of Compound **10** (400 MHz, CDCl<sub>3</sub>)**

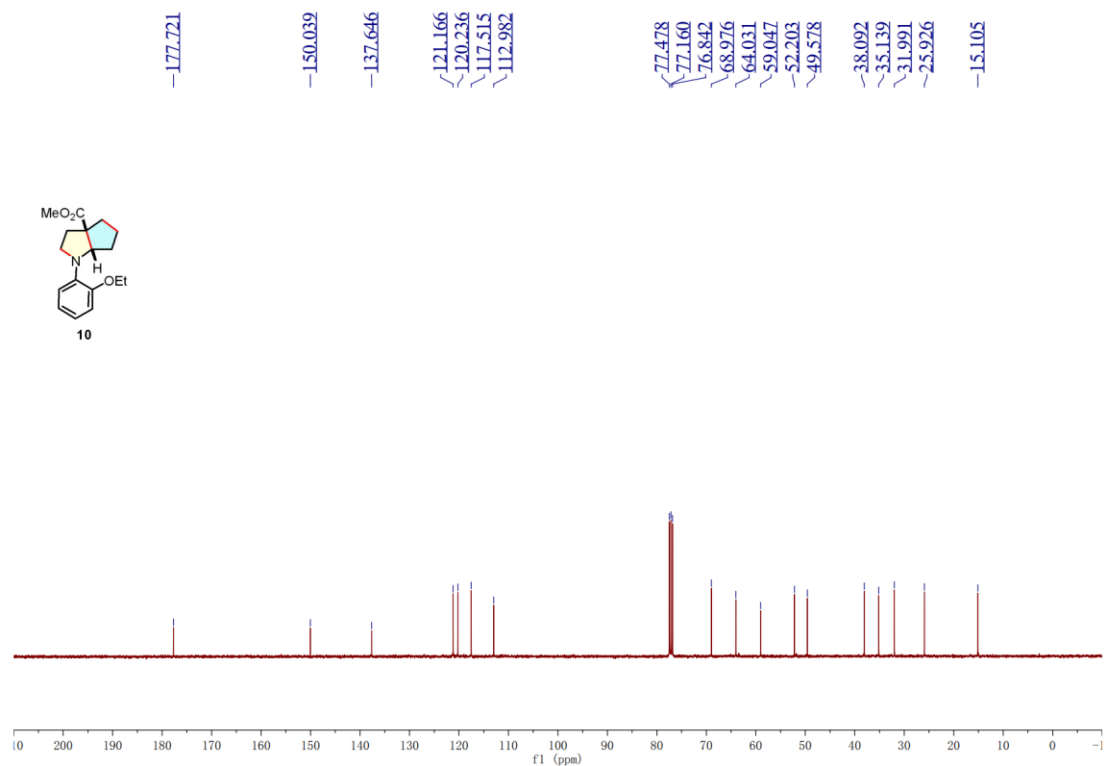

**<sup>13</sup>C{<sup>1</sup>H} NMR Spectrum of Compound **10** (100 MHz, CDCl<sub>3</sub>)**

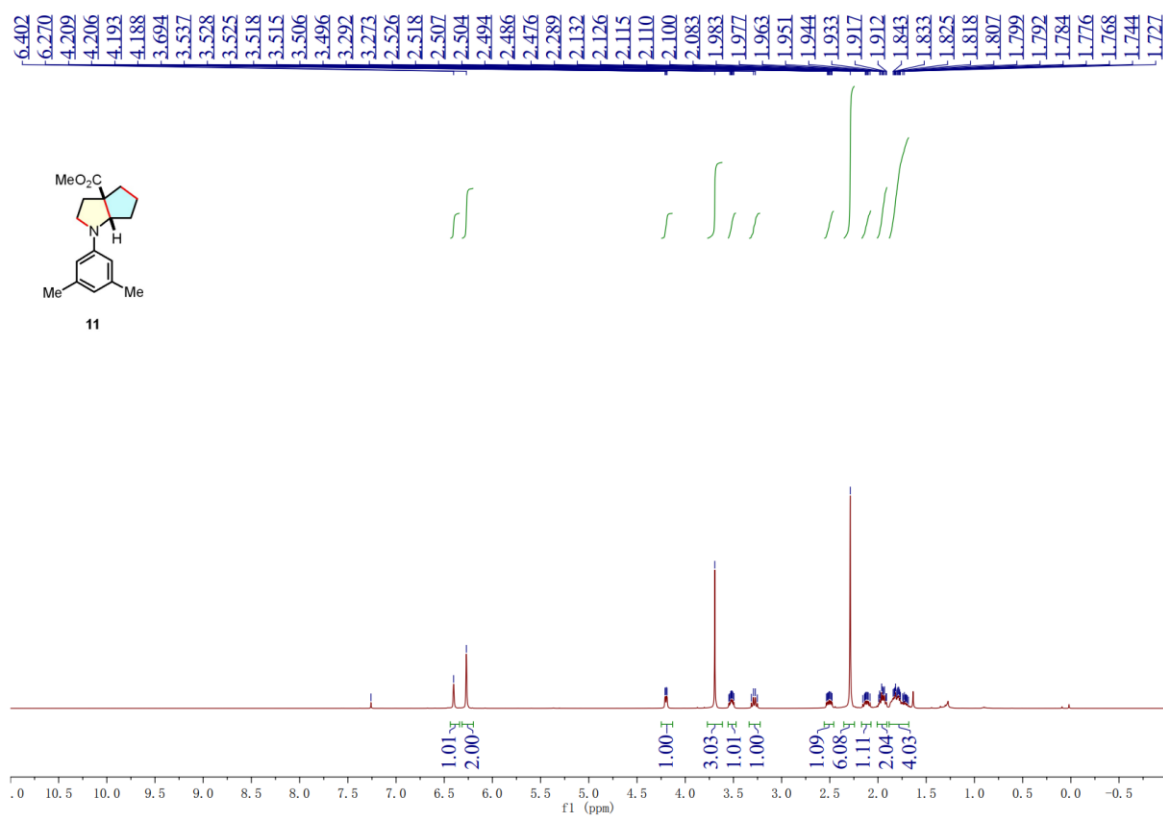

**<sup>1</sup>H NMR Spectrum of Compound 11 (400 MHz, CDCl<sub>3</sub>)**

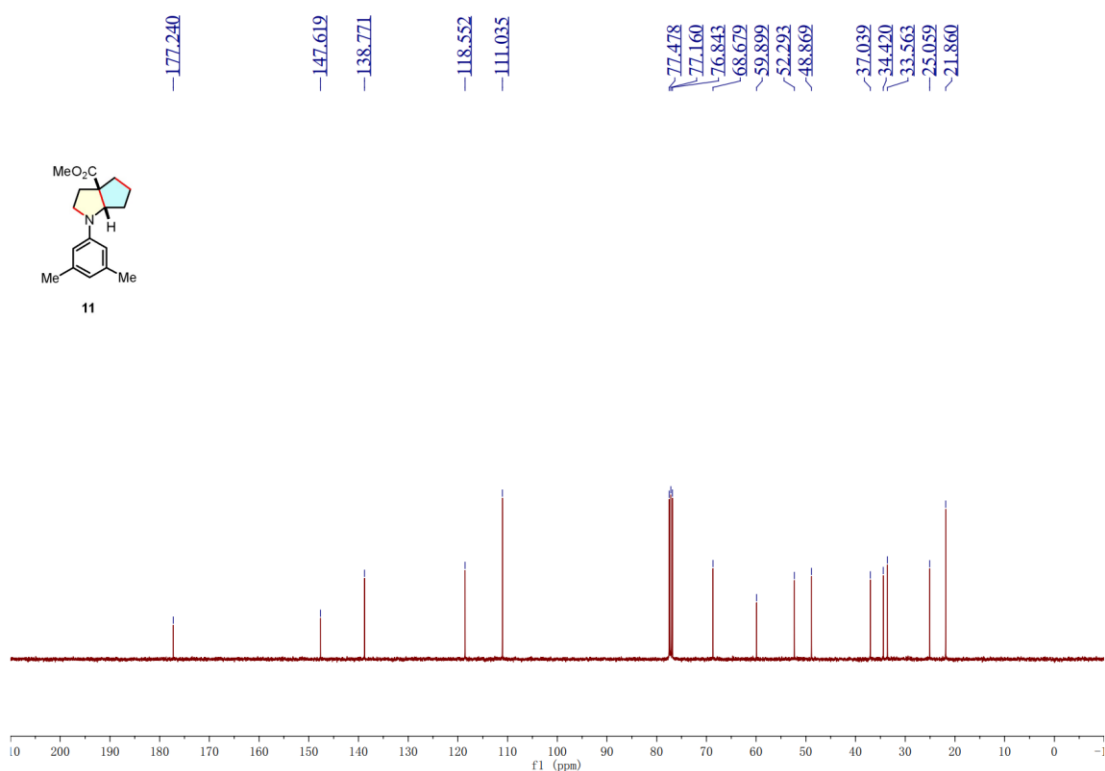

**<sup>13</sup>C NMR Spectrum of Compound 11 (100 MHz, CDCl<sub>3</sub>)**



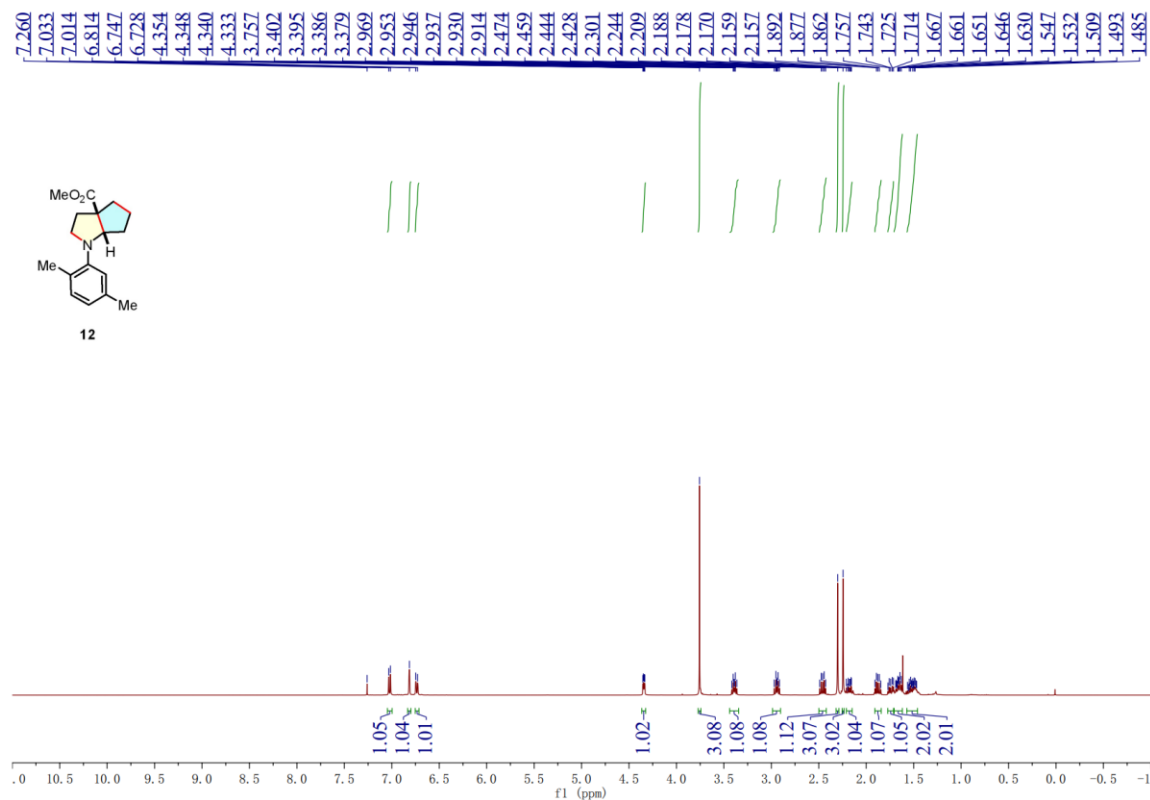

**<sup>1</sup>H NMR Spectrum of Compound 12 (400 MHz, CDCl<sub>3</sub>)**

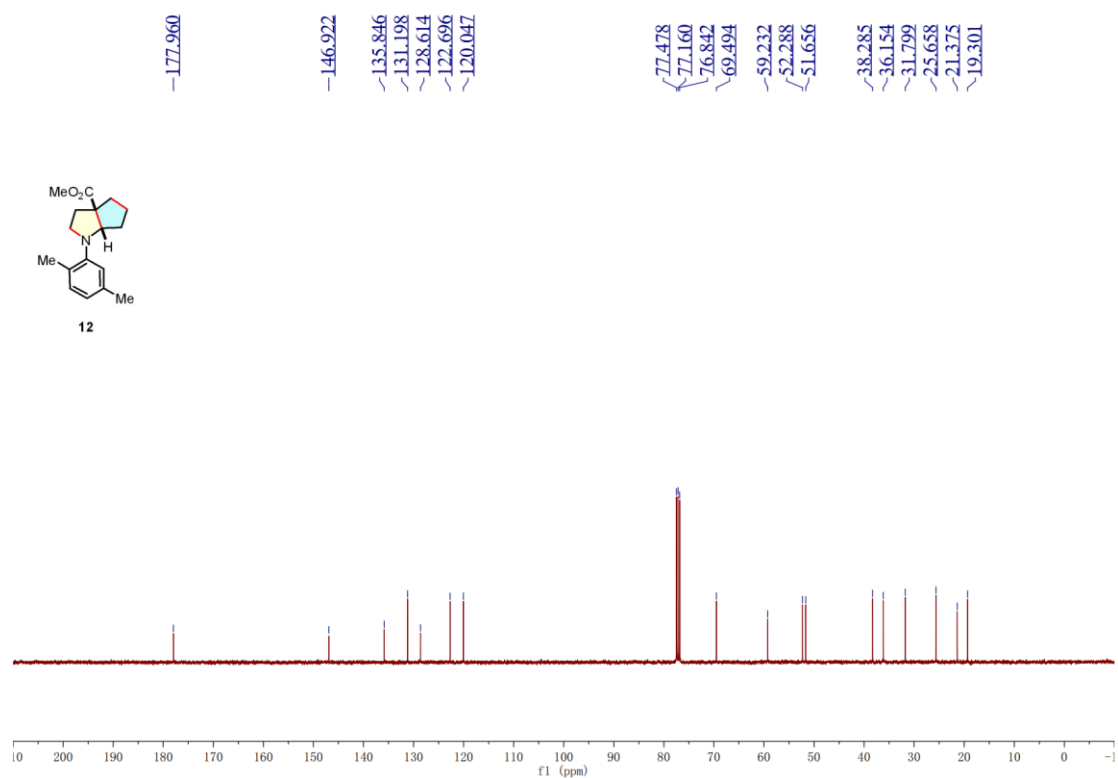

**<sup>13</sup>C {<sup>1</sup>H} NMR Spectrum of Compound 12 (100 MHz, CDCl<sub>3</sub>)**

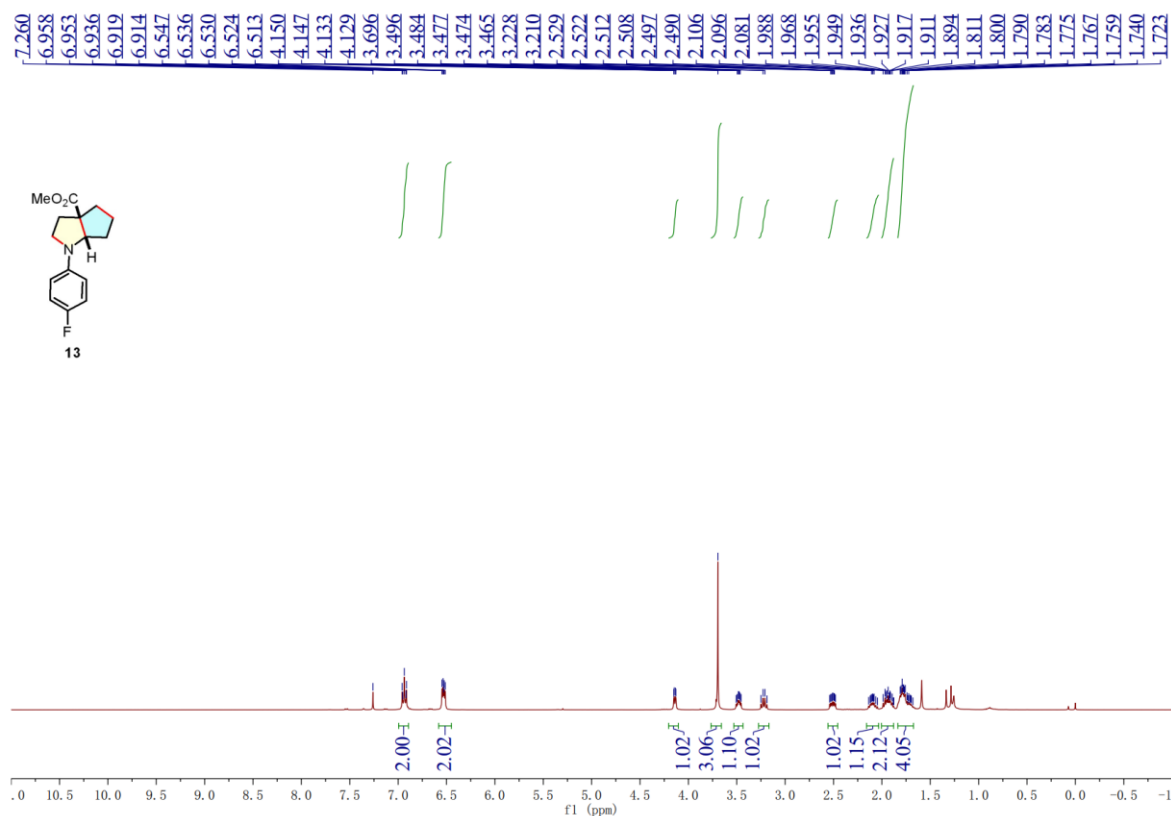

**<sup>1</sup>H NMR Spectrum of Compound **13** (400 MHz, CDCl<sub>3</sub>)**

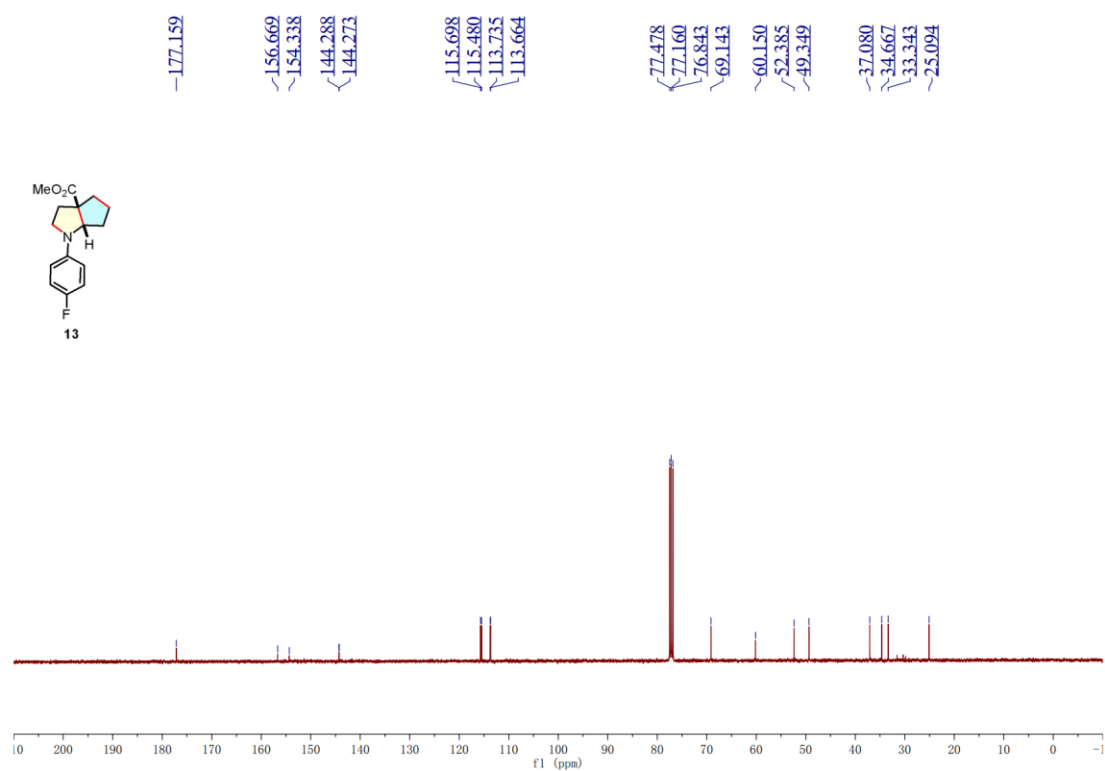

**<sup>13</sup>C{<sup>1</sup>H} NMR Spectrum of Compound **13** (100 MHz, CDCl<sub>3</sub>)**

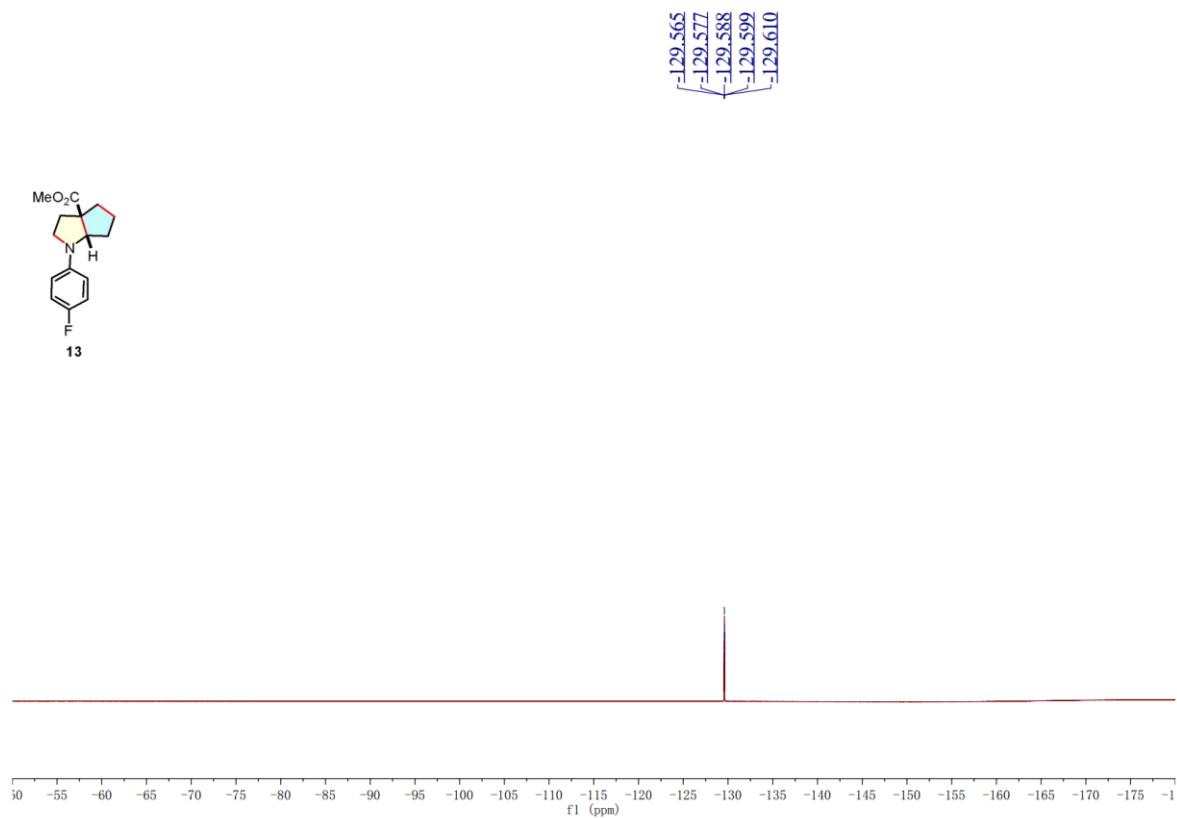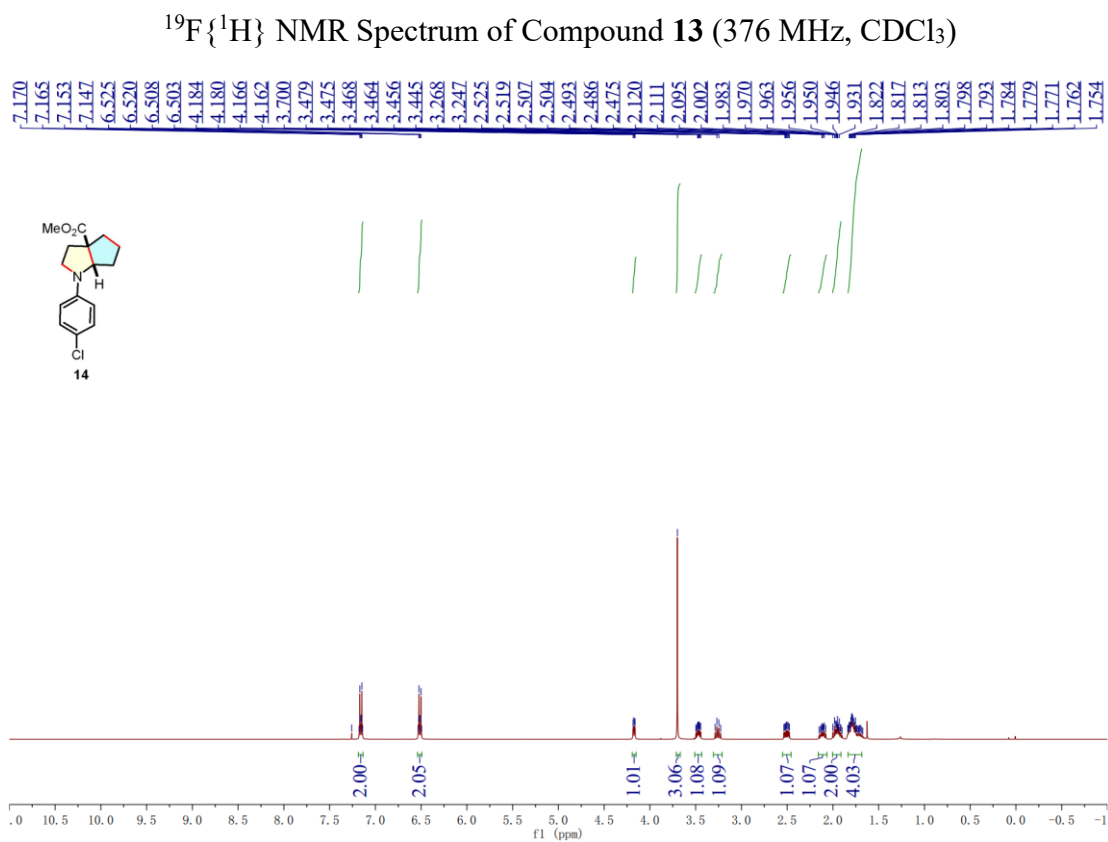

$^1\text{H}$  NMR Spectrum of Compound **14** (400 MHz,  $\text{CDCl}_3$ )

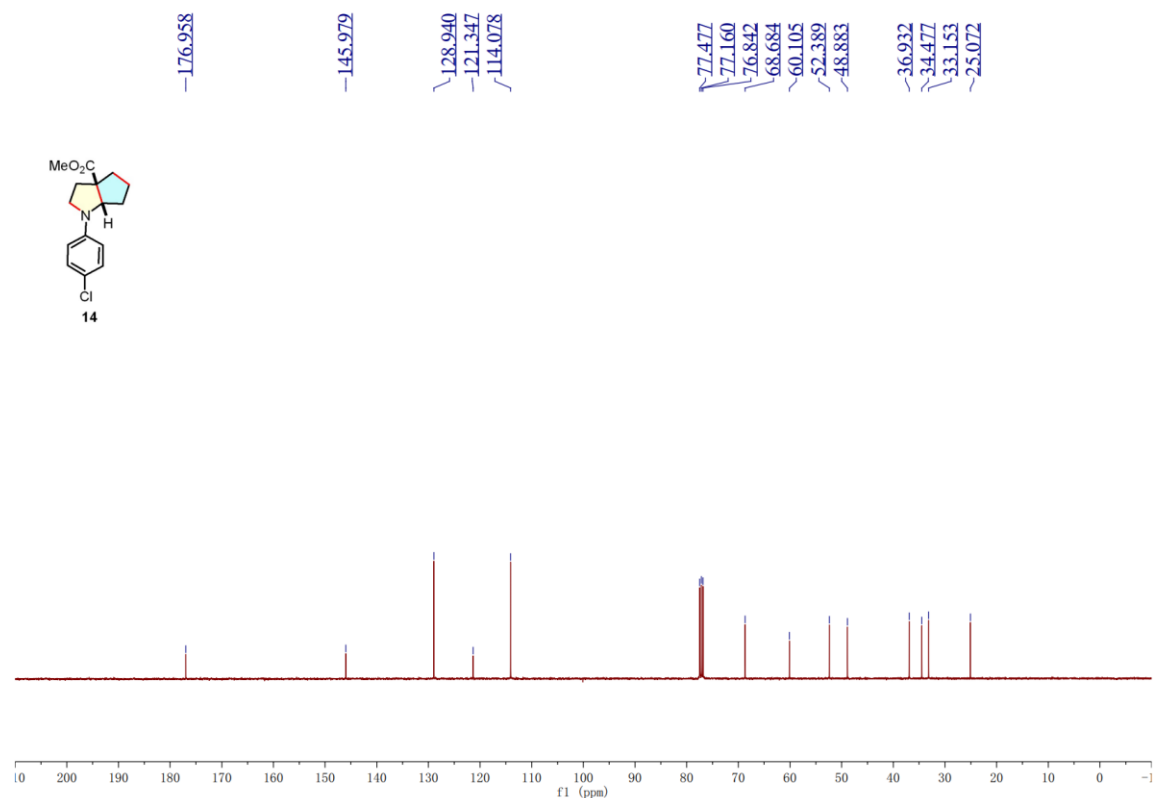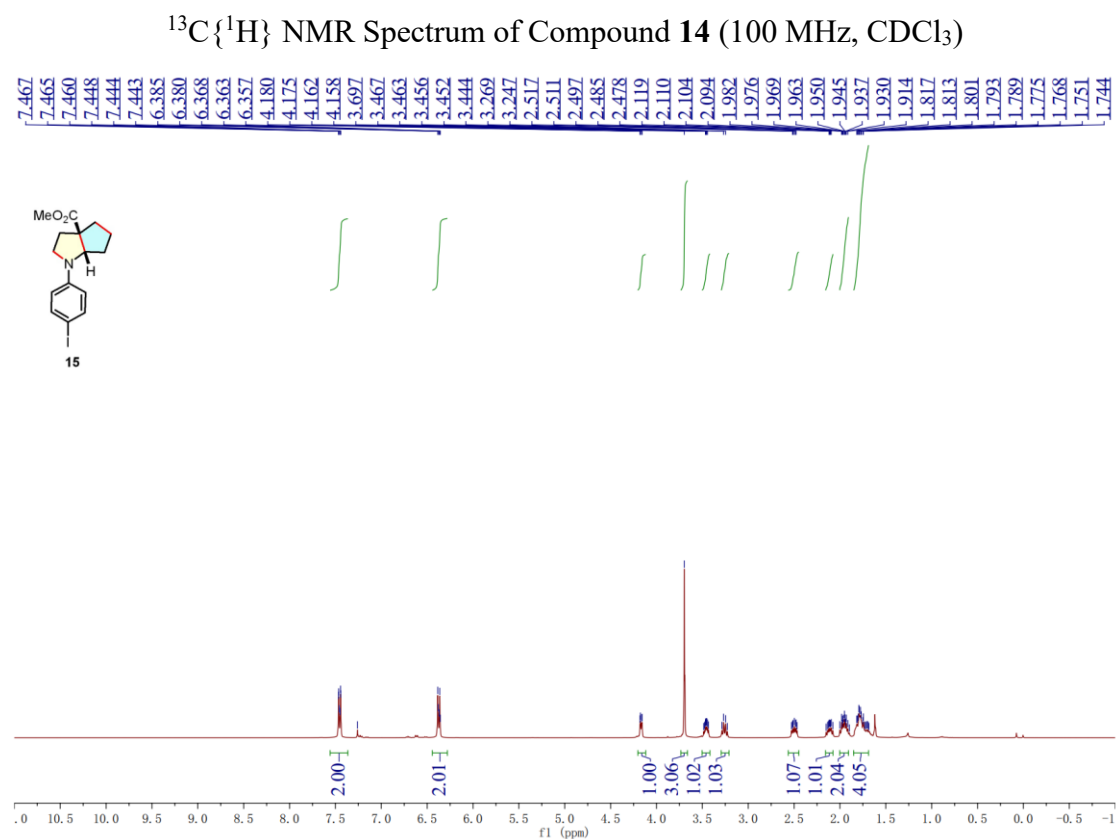

$^1\text{H}$  NMR Spectrum of Compound **15** (400 MHz,  $\text{CDCl}_3$ )

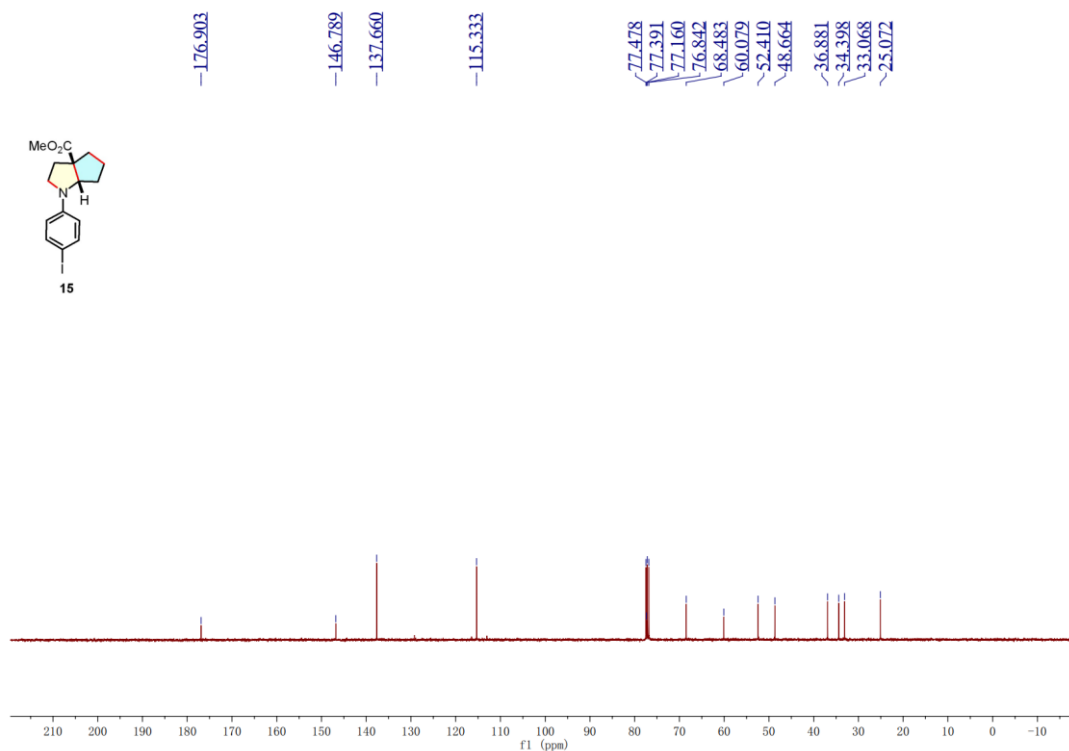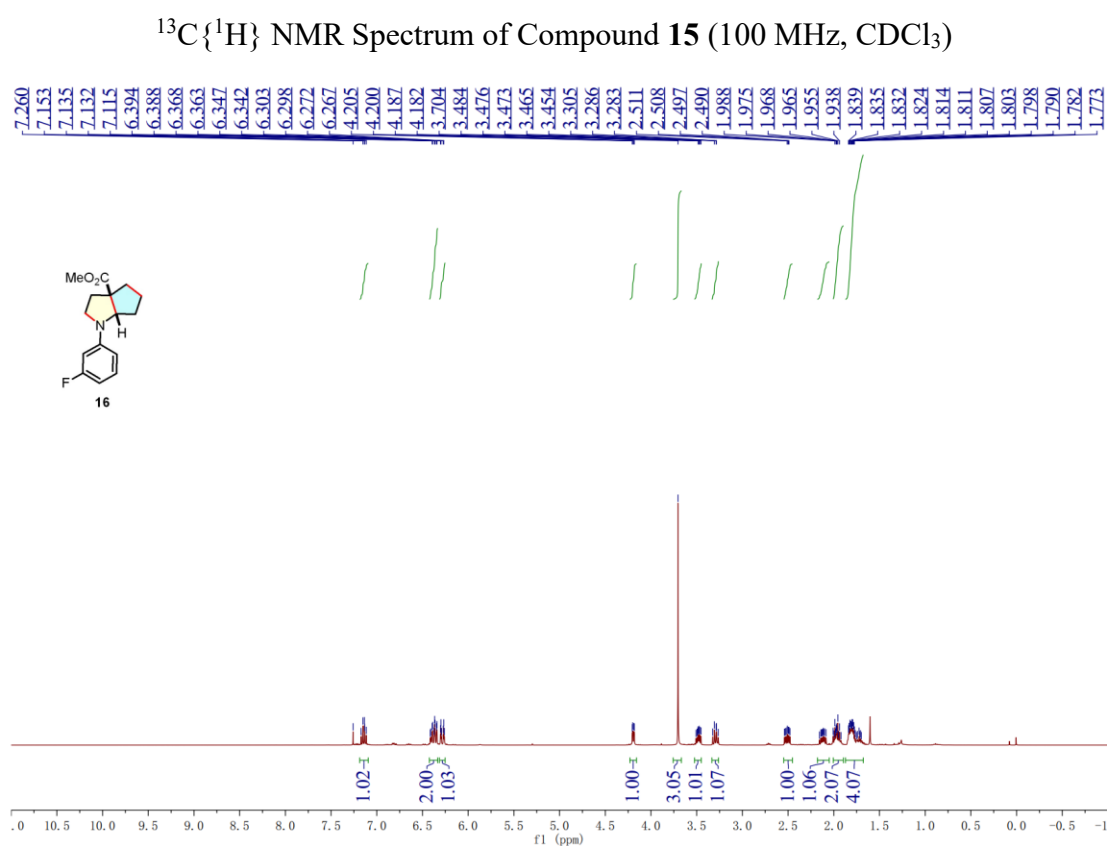

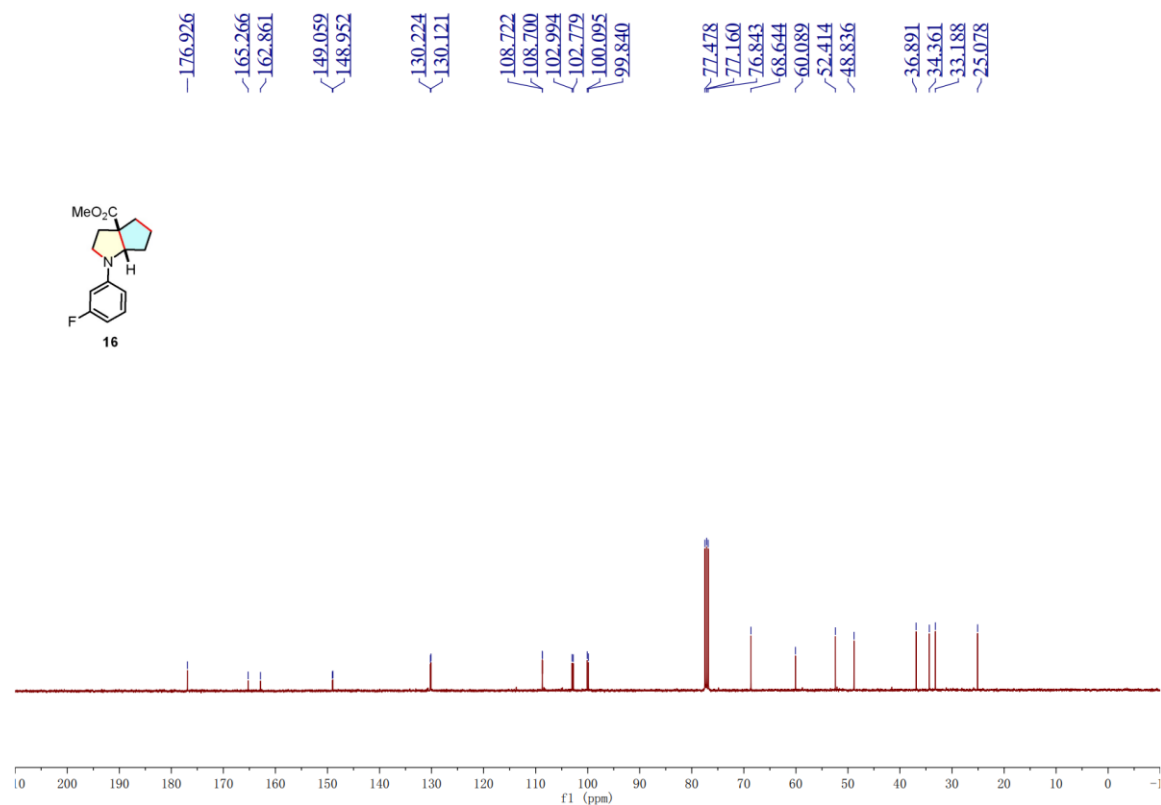

<sup>13</sup>C{<sup>1</sup>H} NMR Spectrum of Compound **16** (100 MHz, CDCl<sub>3</sub>)

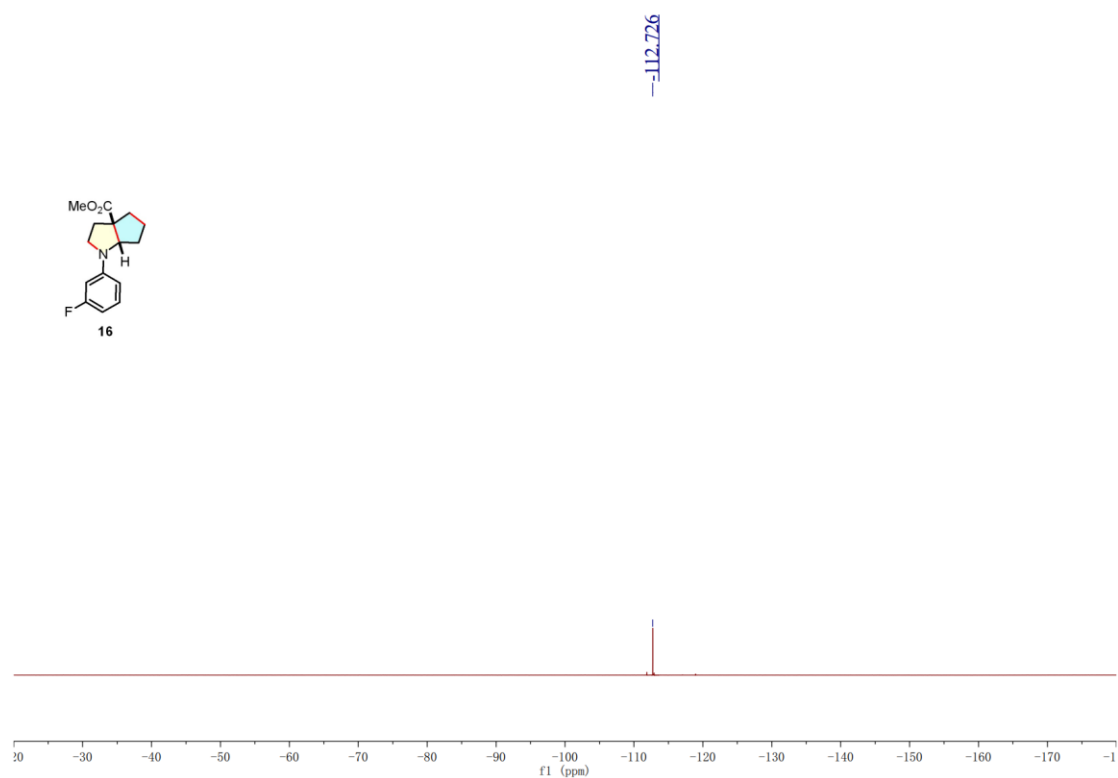

<sup>19</sup>F{<sup>1</sup>H} NMR Spectrum of Compound **16** (376 MHz, CDCl<sub>3</sub>)

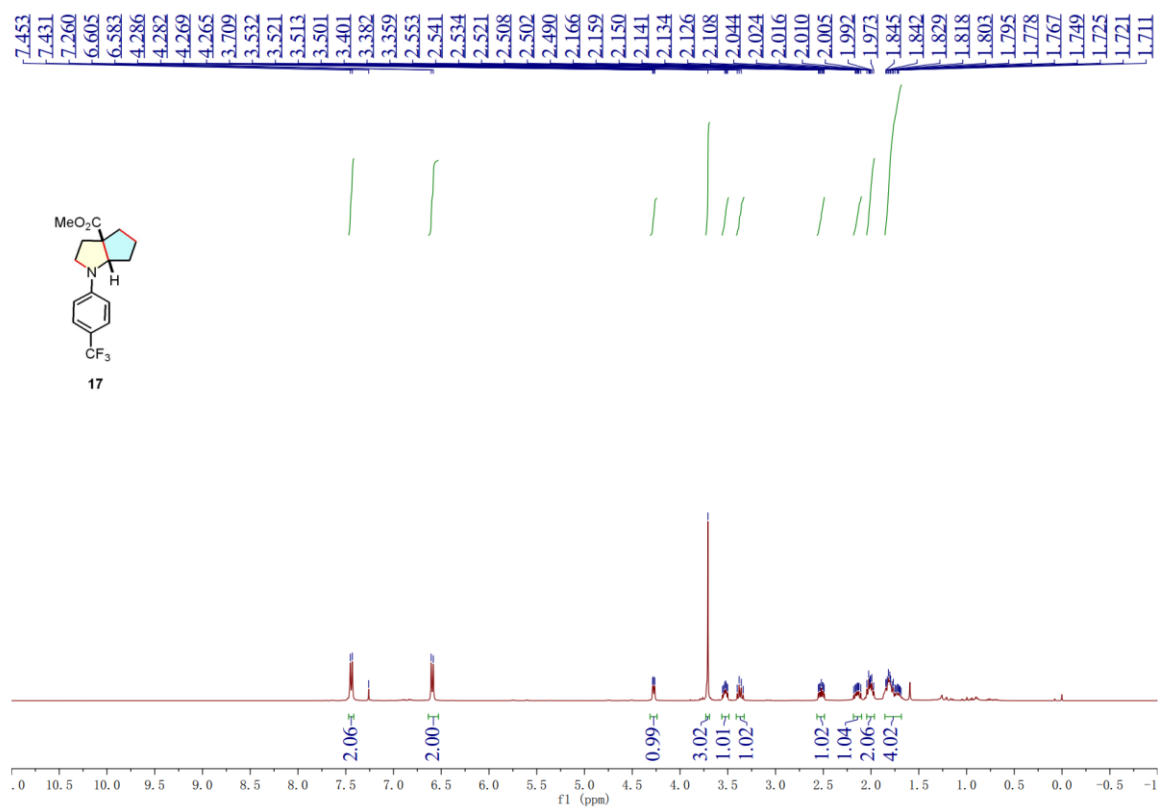

**<sup>1</sup>H NMR Spectrum of Compound 17 (400 MHz, CDCl<sub>3</sub>)**

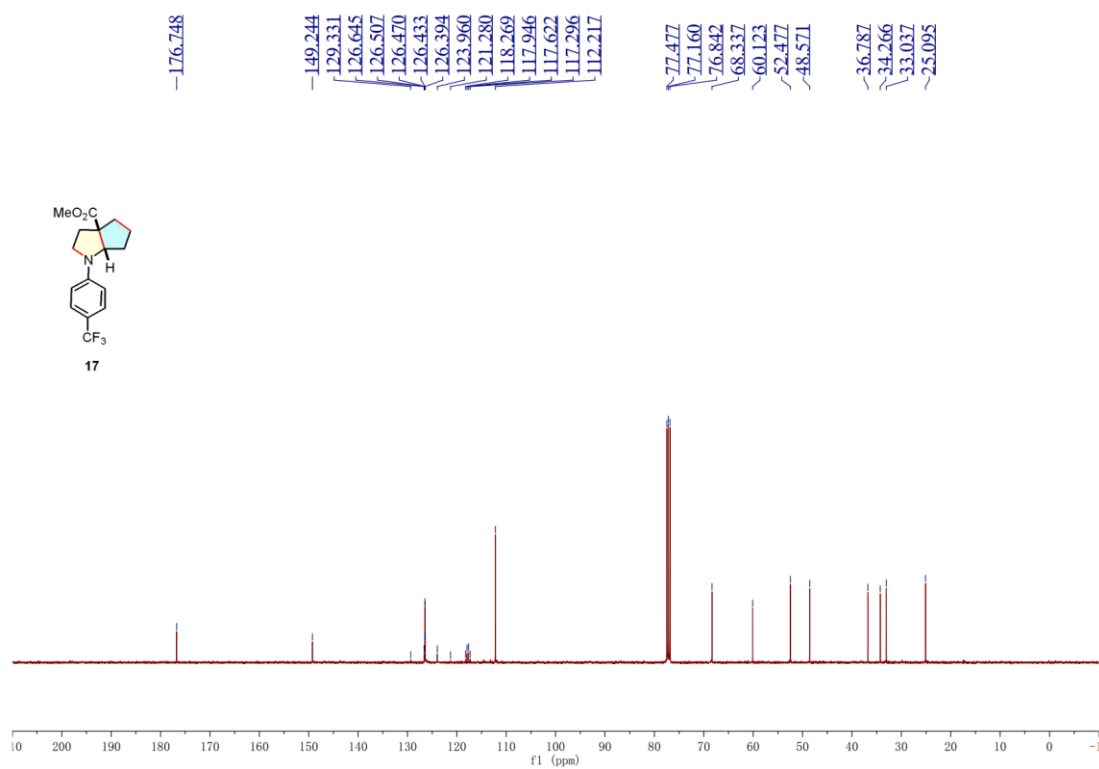

**<sup>13</sup>C{<sup>1</sup>H} NMR Spectrum of Compound 17 (100 MHz, CDCl<sub>3</sub>)**

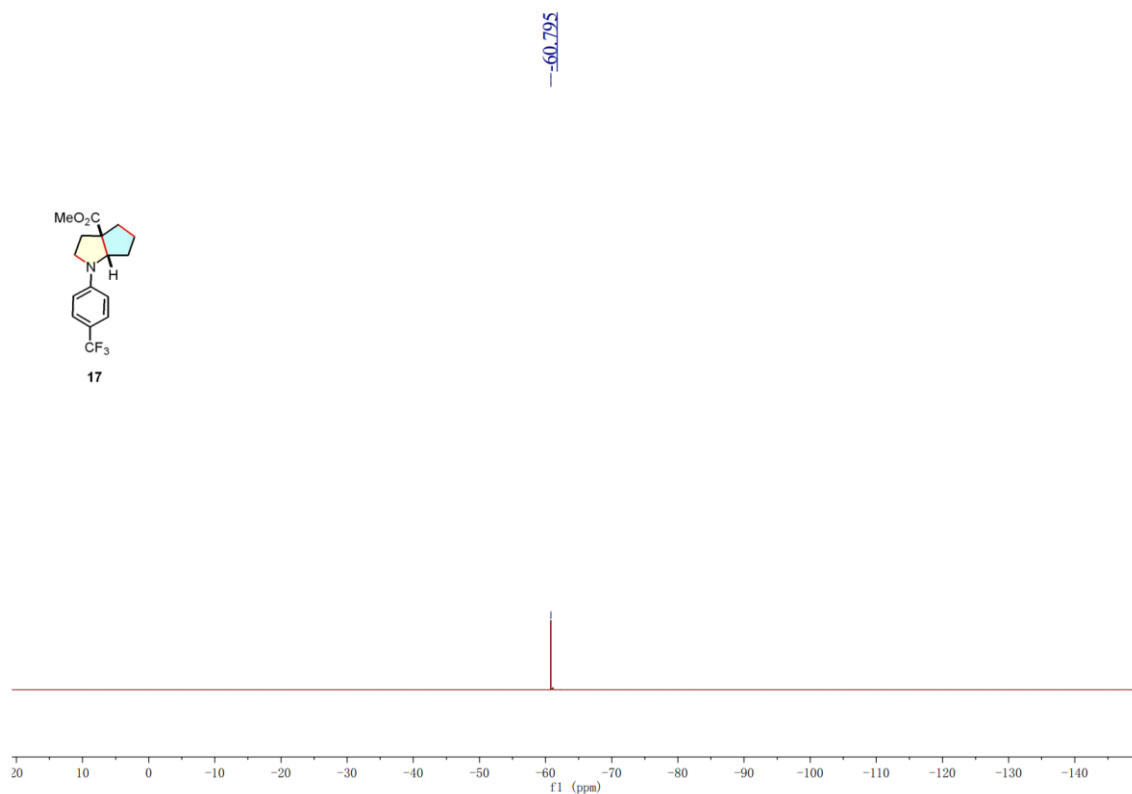

$^{19}\text{F}\{^1\text{H}\}$  NMR Spectrum of Compound **17** (376 MHz,  $\text{CDCl}_3$ )

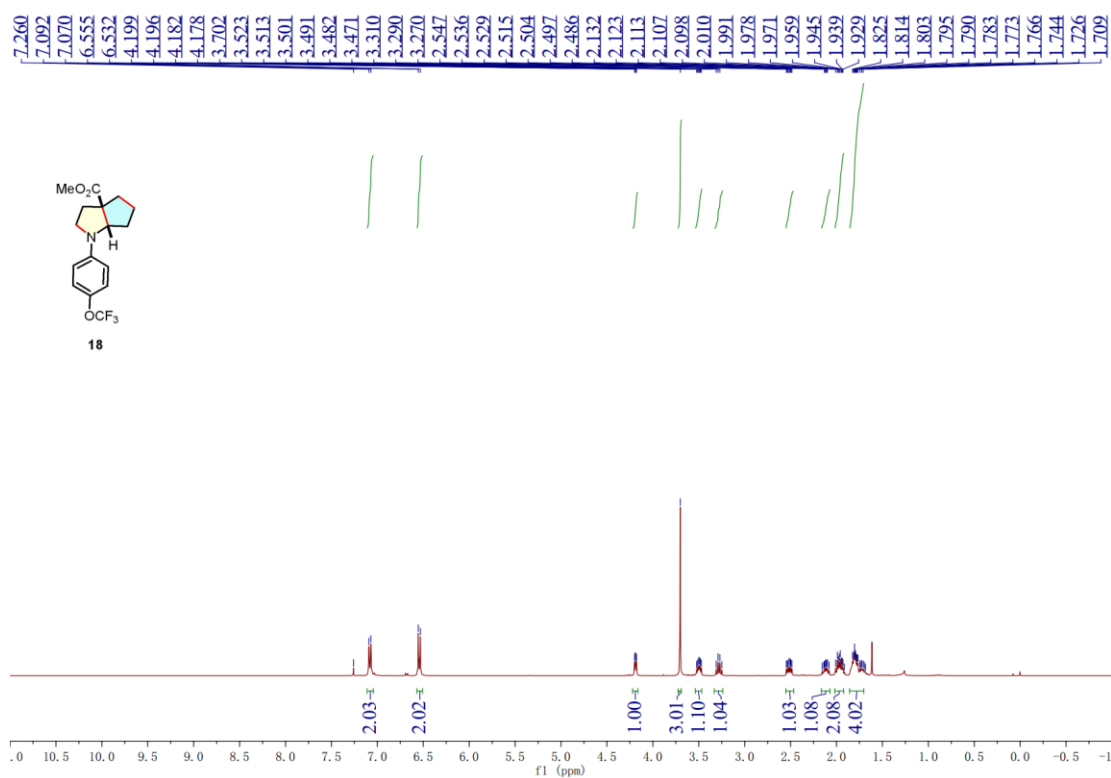

$^1\text{H}$  NMR Spectrum of Compound **18** (400 MHz,  $\text{CDCl}_3$ )



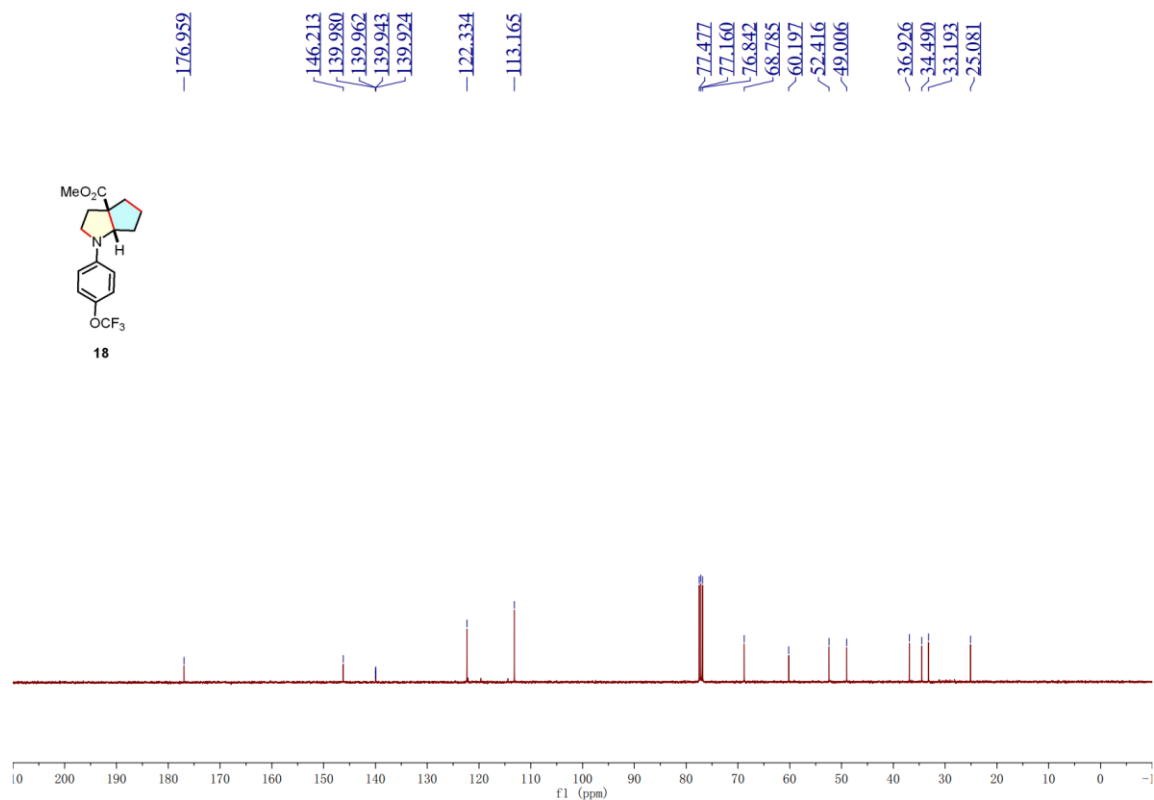

<sup>13</sup>C{<sup>1</sup>H} NMR Spectrum of Compound **18** (100 MHz, CDCl<sub>3</sub>)

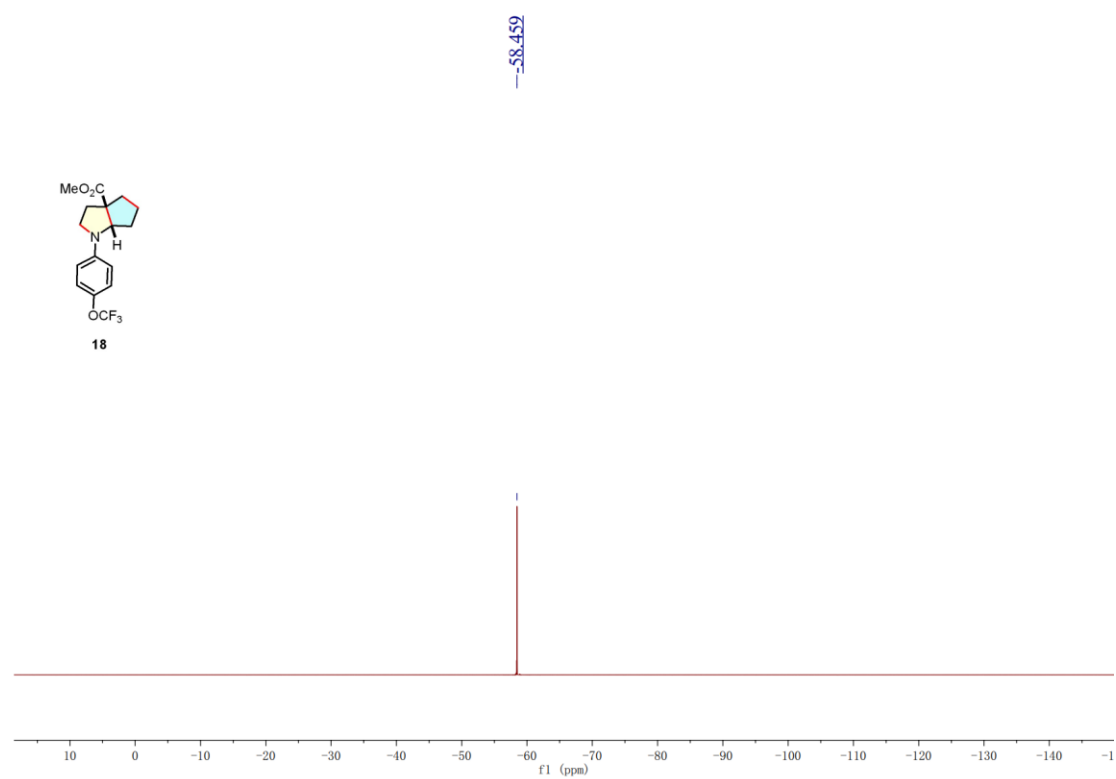

<sup>19</sup>F{<sup>1</sup>H} NMR Spectrum of Compound **18** (376 MHz, CDCl<sub>3</sub>)

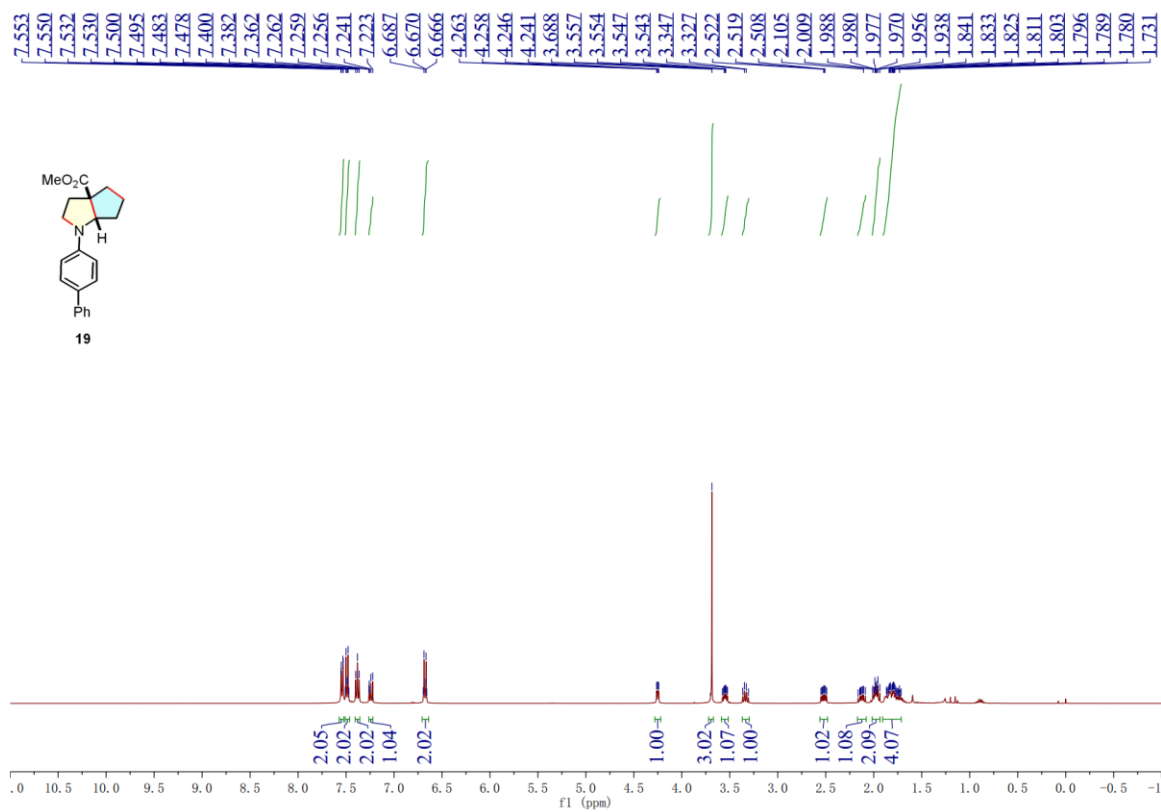

<sup>1</sup>H NMR Spectrum of Compound 19 (400 MHz, CDCl<sub>3</sub>)

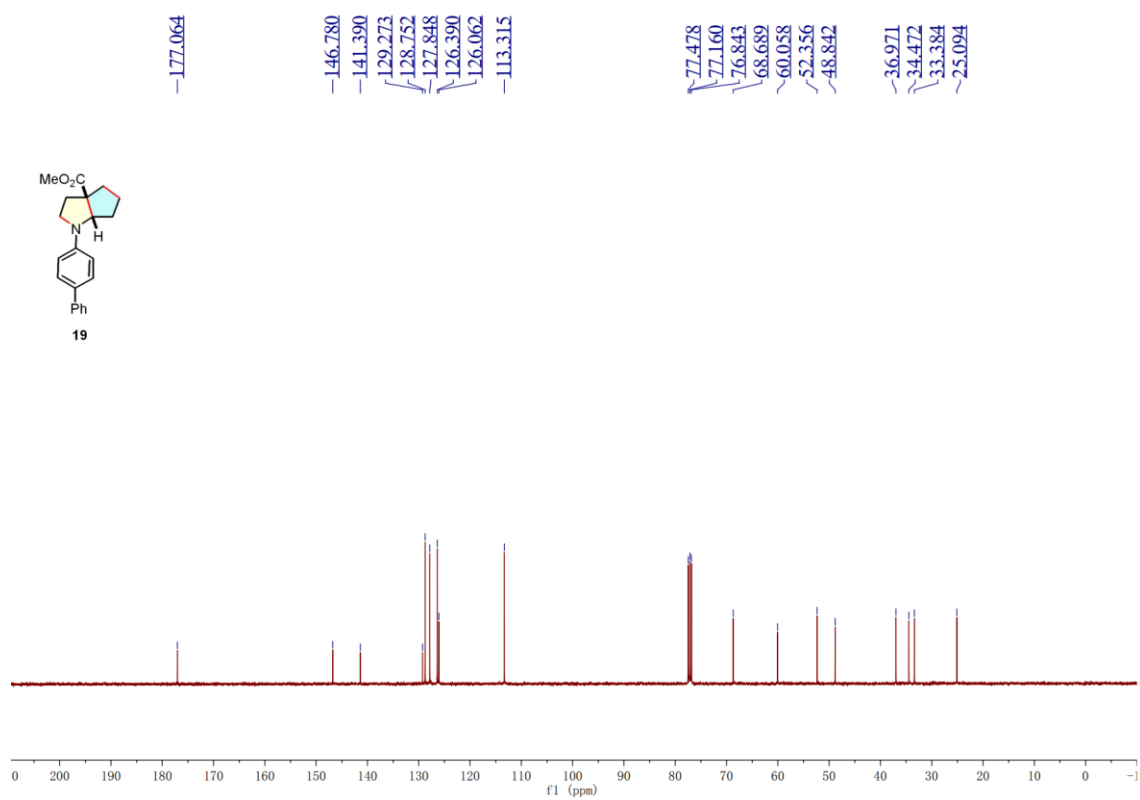

<sup>13</sup>C {<sup>1</sup>H} NMR Spectrum of Compound 19 (100 MHz, CDCl<sub>3</sub>)

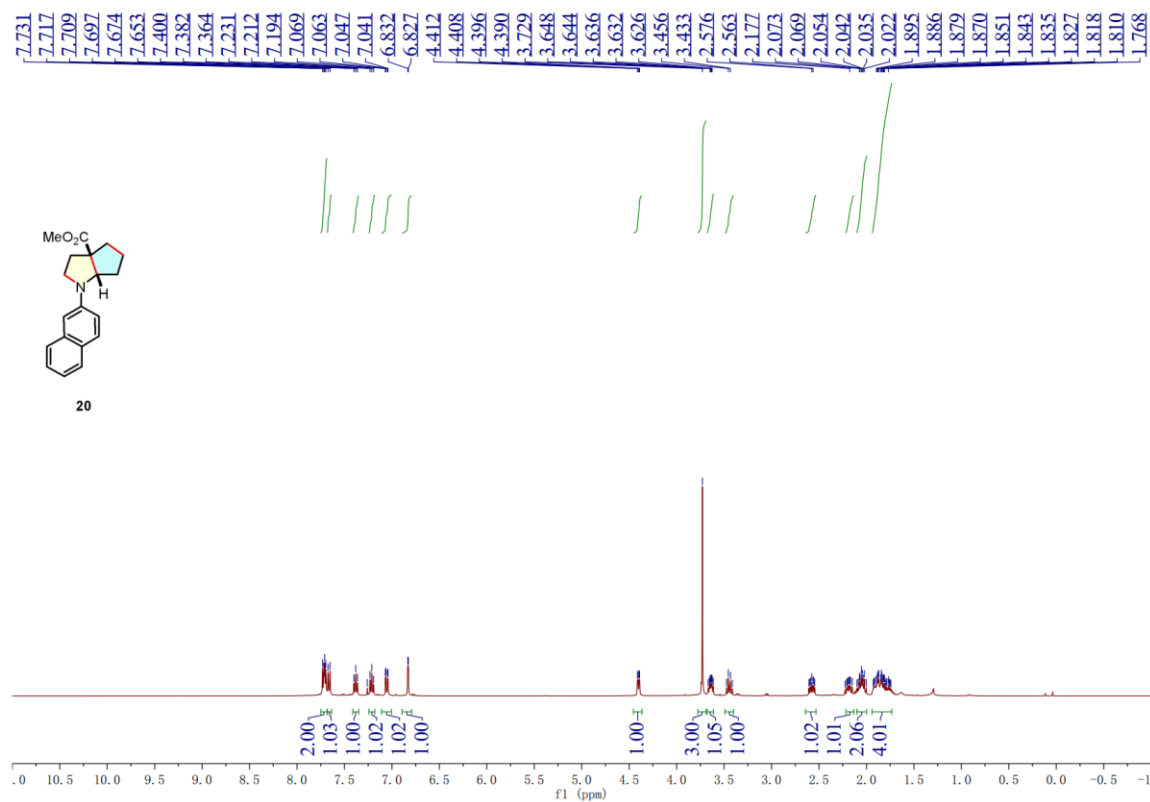

**<sup>1</sup>H NMR Spectrum of Compound **20** (400 MHz, CDCl<sub>3</sub>)**

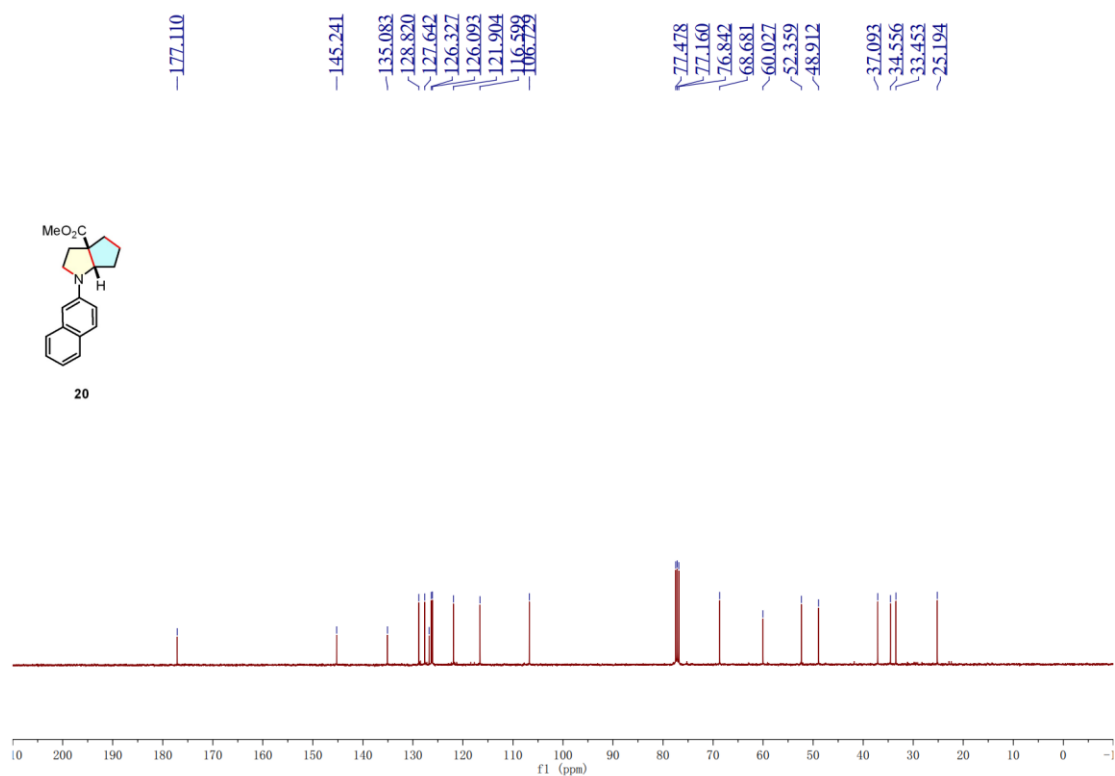

**<sup>13</sup>C {<sup>1</sup>H} NMR Spectrum of Compound **20** (100 MHz, CDCl<sub>3</sub>)**

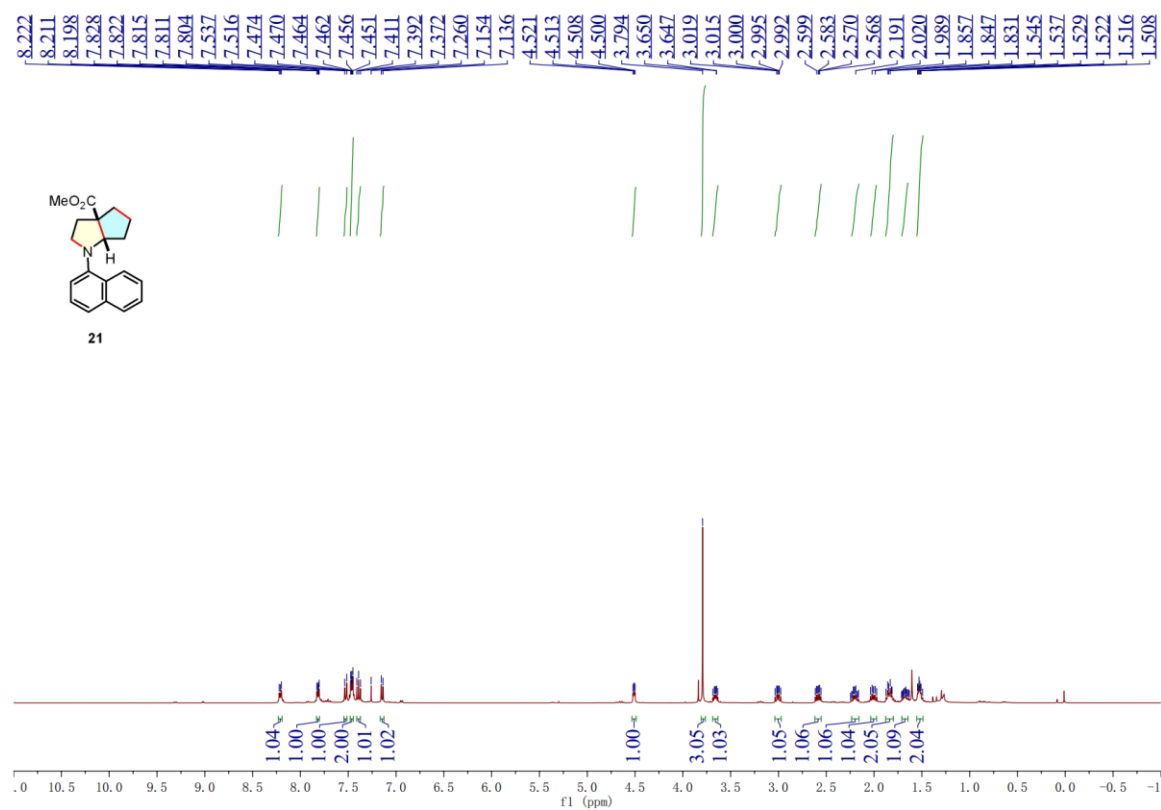

**<sup>1</sup>H NMR Spectrum of Compound **21** (400 MHz, CDCl<sub>3</sub>)**

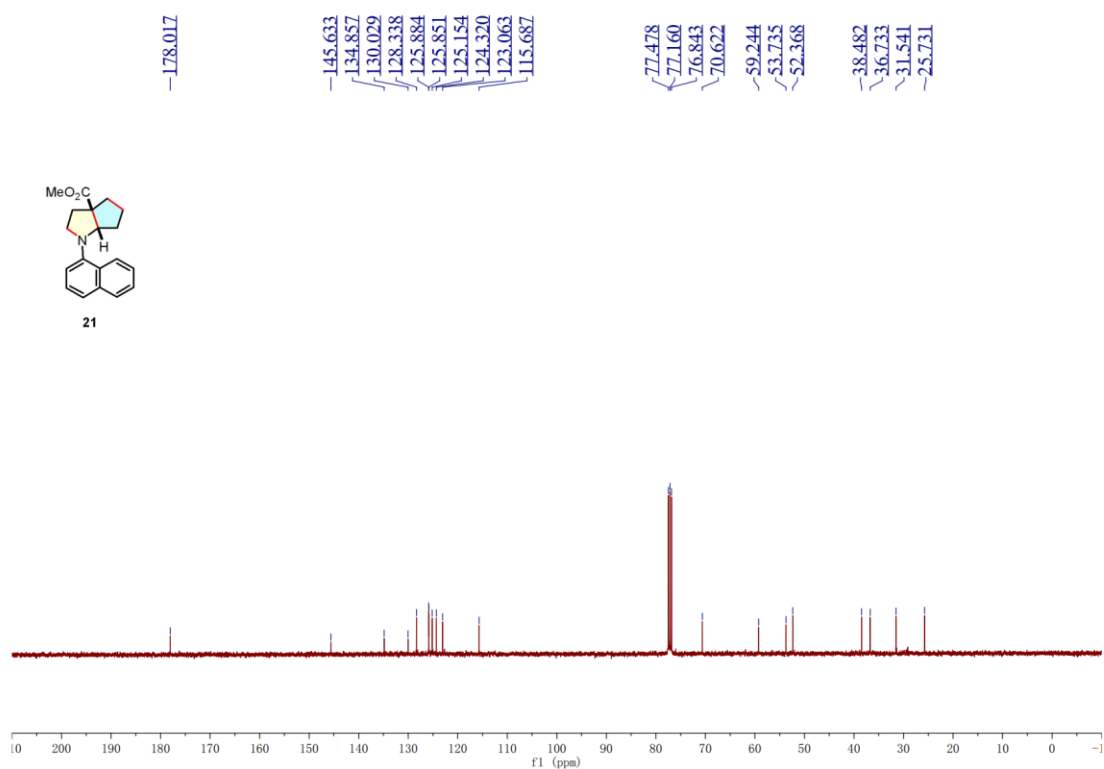

**<sup>13</sup>C {<sup>1</sup>H} NMR Spectrum of Compound **21** (100 MHz, CDCl<sub>3</sub>)**

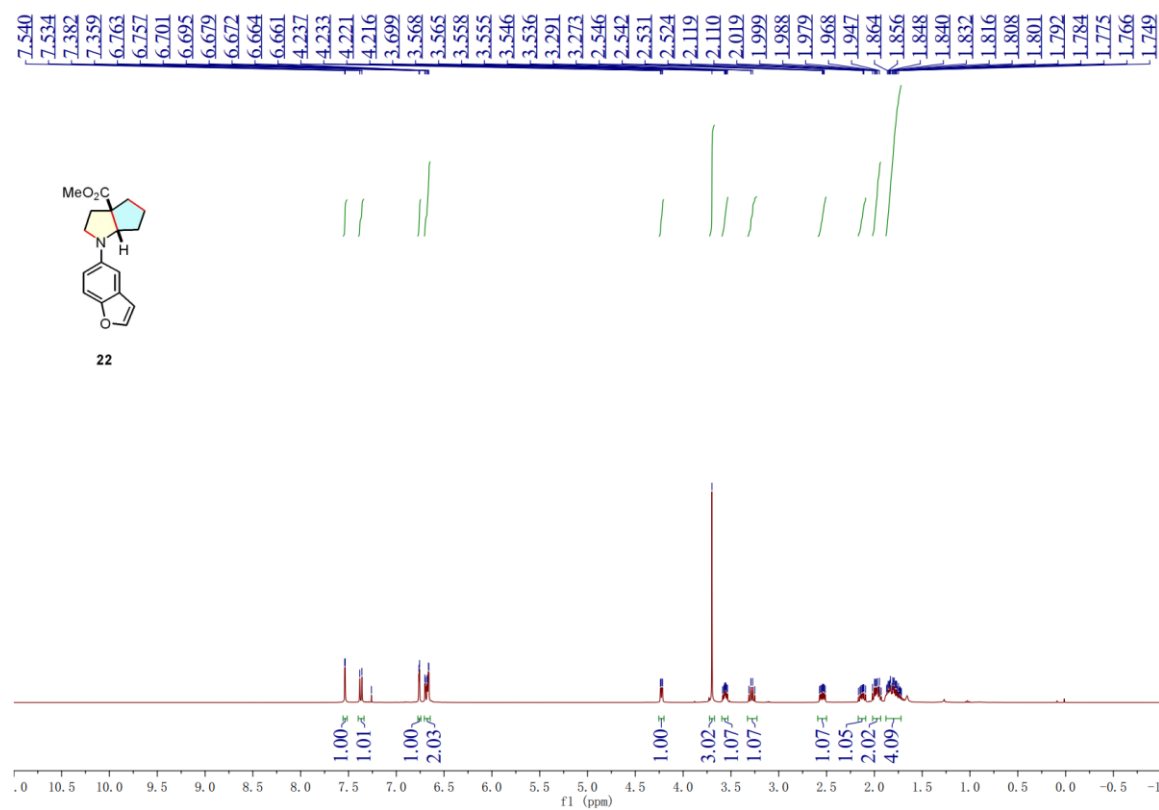

**<sup>1</sup>H NMR Spectrum of Compound 22 (400 MHz, CDCl<sub>3</sub>)**

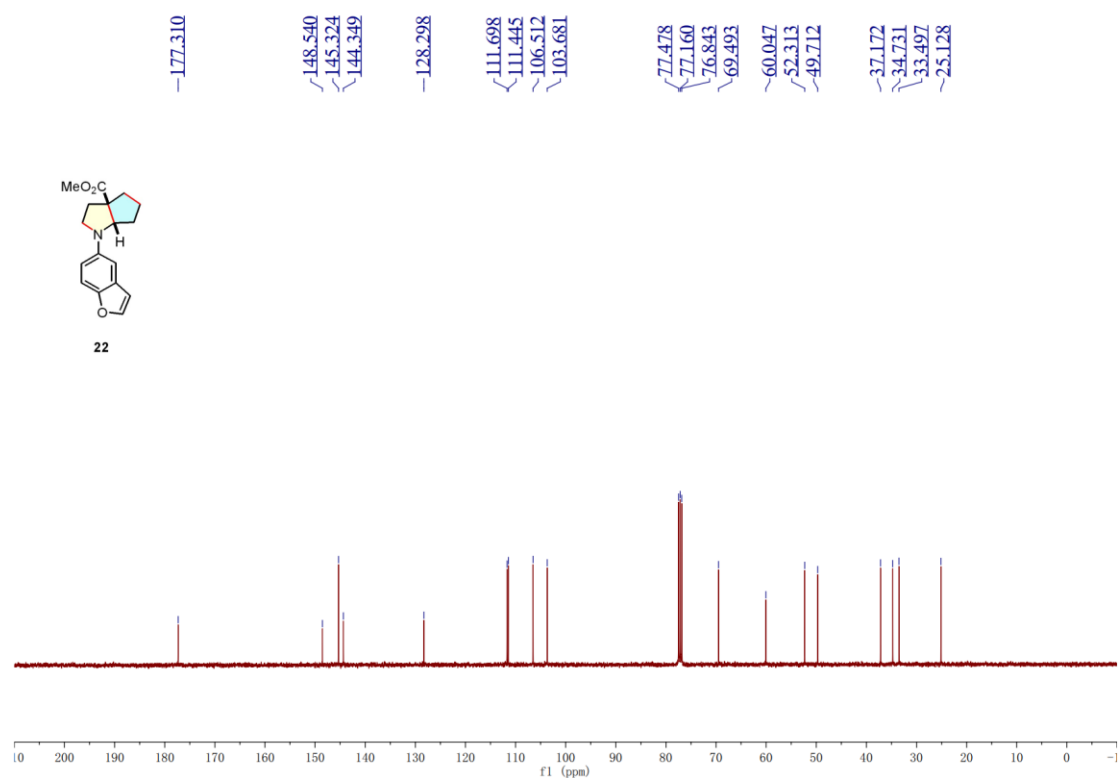

**<sup>13</sup>C {<sup>1</sup>H} NMR Spectrum of Compound 22 (100 MHz, CDCl<sub>3</sub>)**



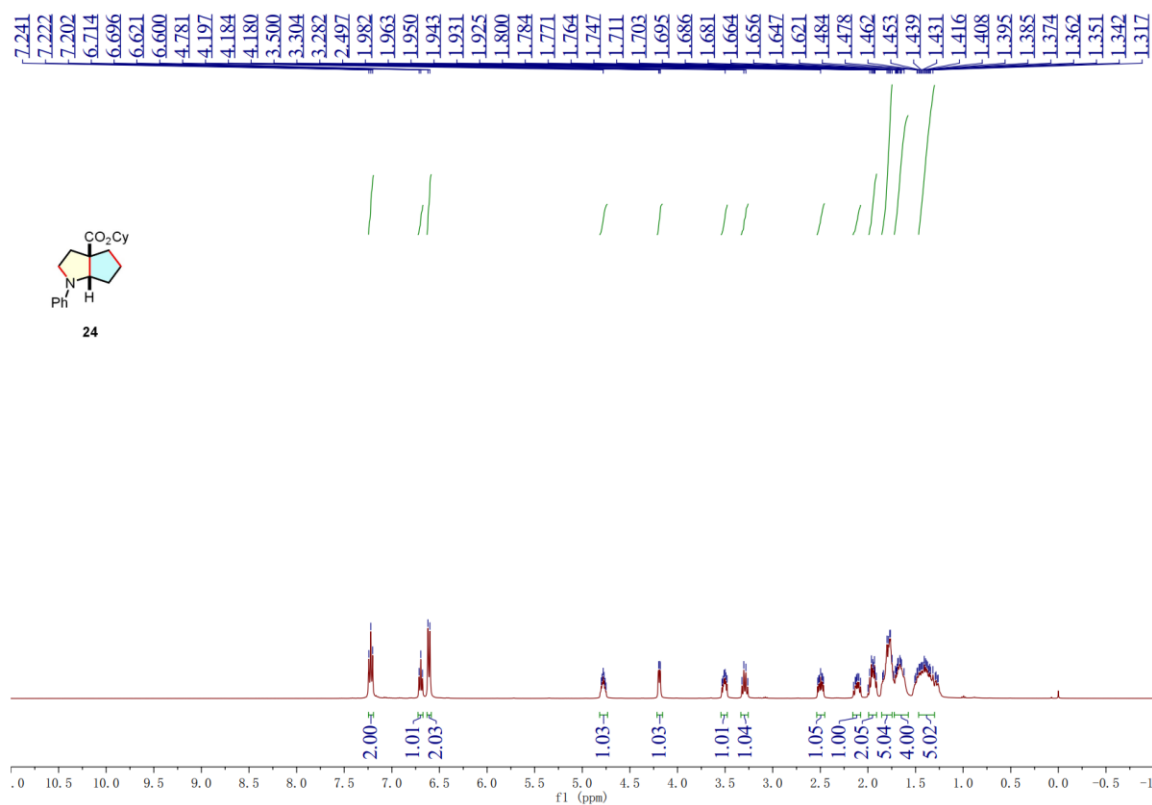

<sup>1</sup>H NMR Spectrum of Compound **24** (400 MHz, CDCl<sub>3</sub>)

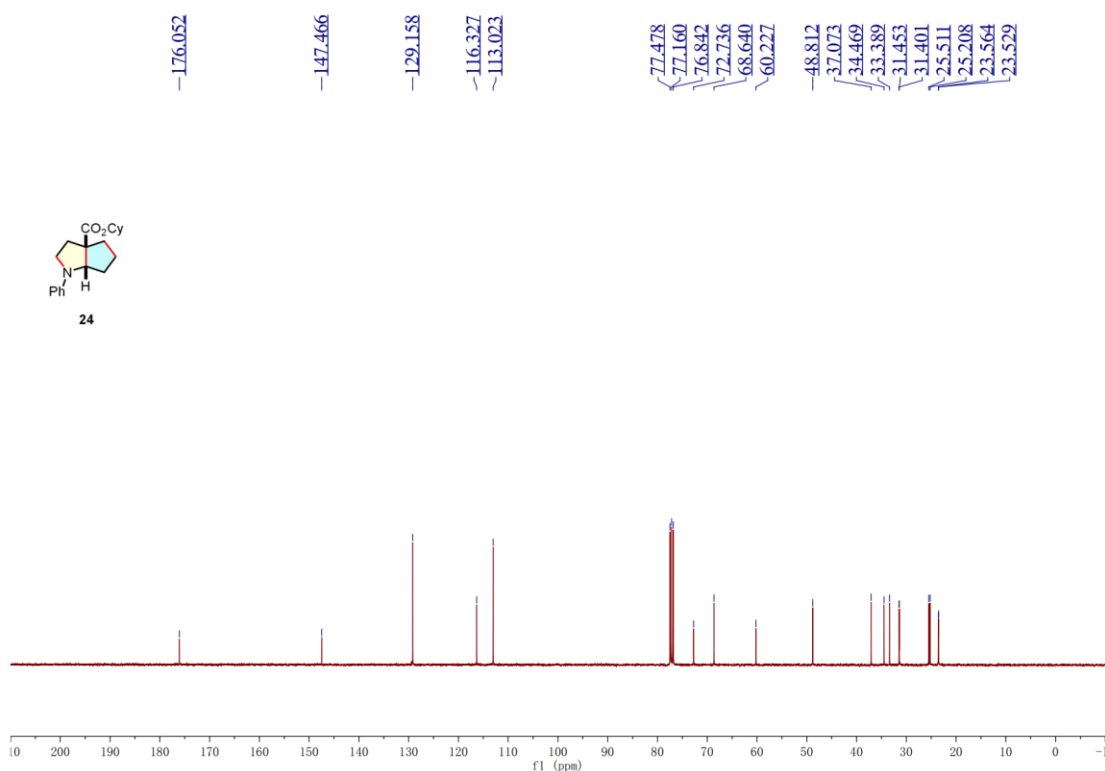

<sup>13</sup>C {<sup>1</sup>H} NMR Spectrum of Compound **24** (100 MHz, CDCl<sub>3</sub>)

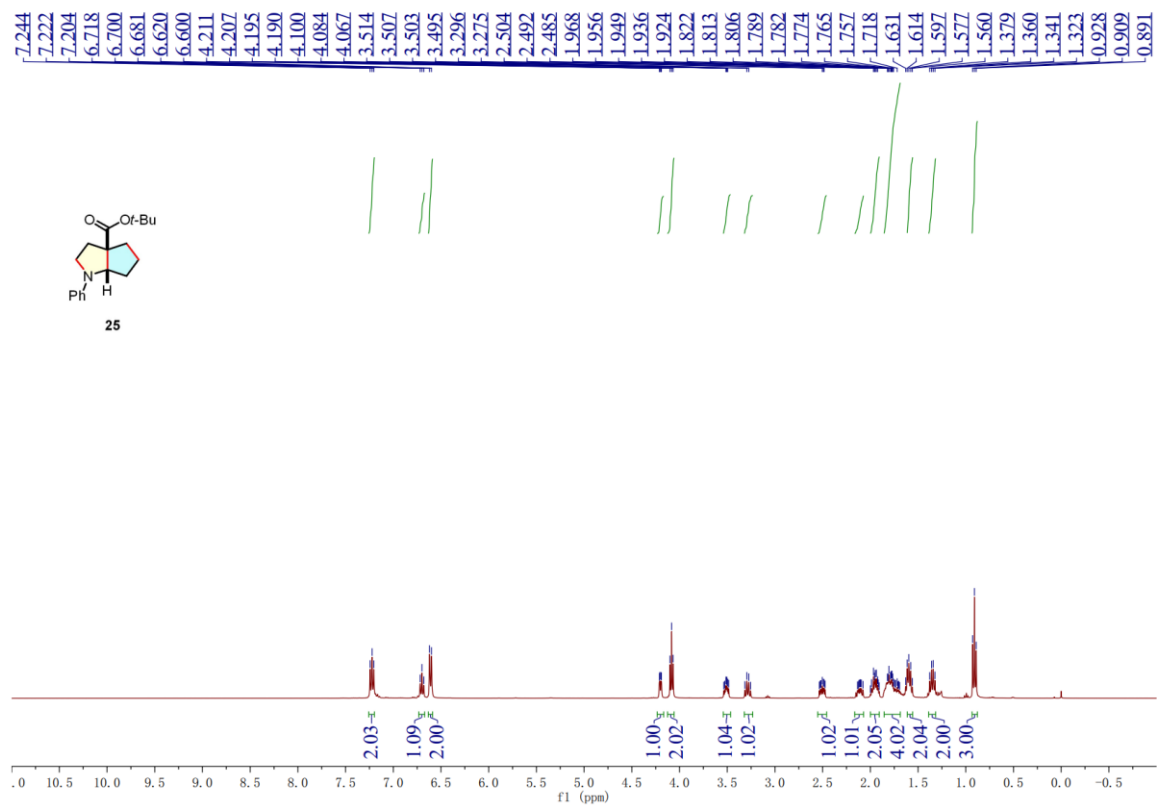

<sup>1</sup>H NMR Spectrum of Compound **25** (400 MHz, CDCl<sub>3</sub>)

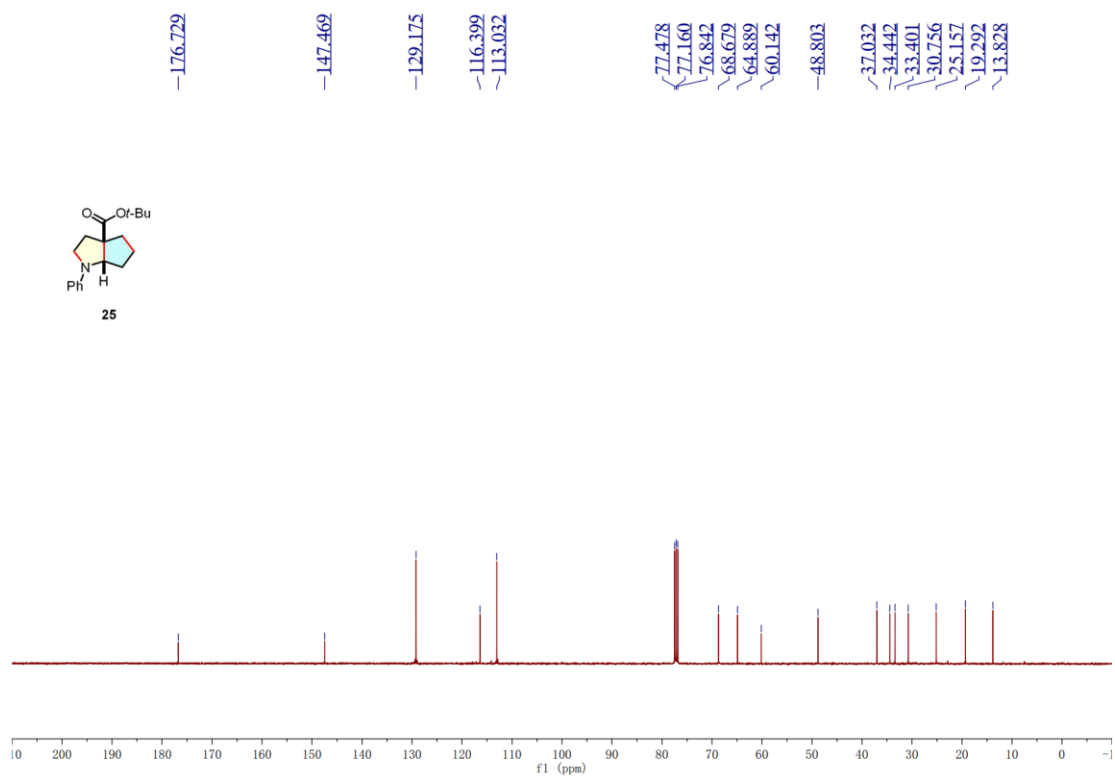

<sup>13</sup>C {<sup>1</sup>H} NMR Spectrum of Compound **25** (100 MHz, CDCl<sub>3</sub>)



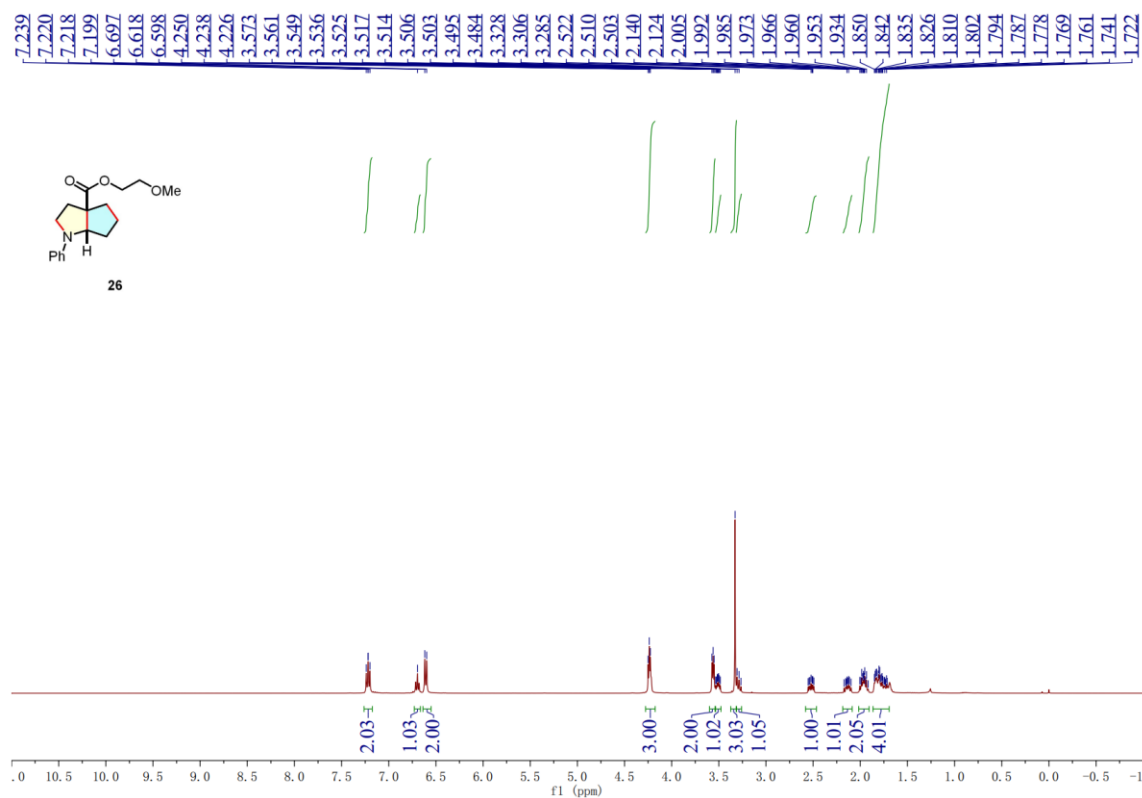

**<sup>1</sup>H NMR Spectrum of Compound **26** (400 MHz, CDCl<sub>3</sub>)**

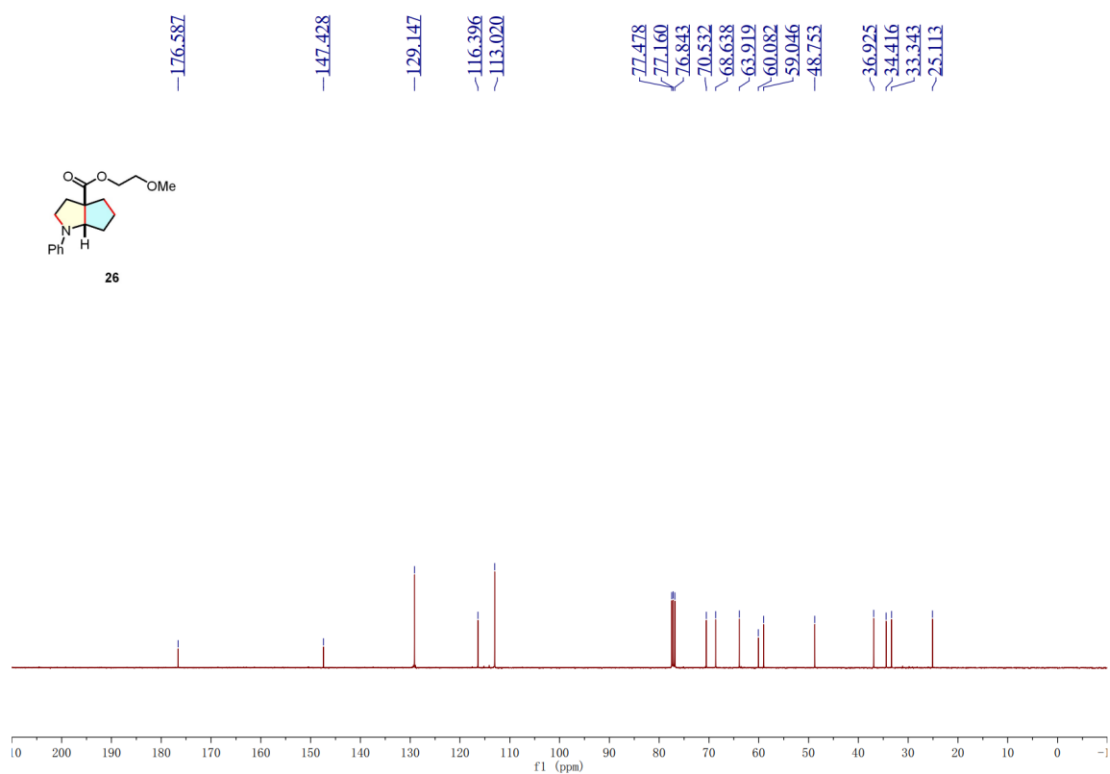

**<sup>13</sup>C{<sup>1</sup>H} NMR Spectrum of Compound **26** (100 MHz, CDCl<sub>3</sub>)**

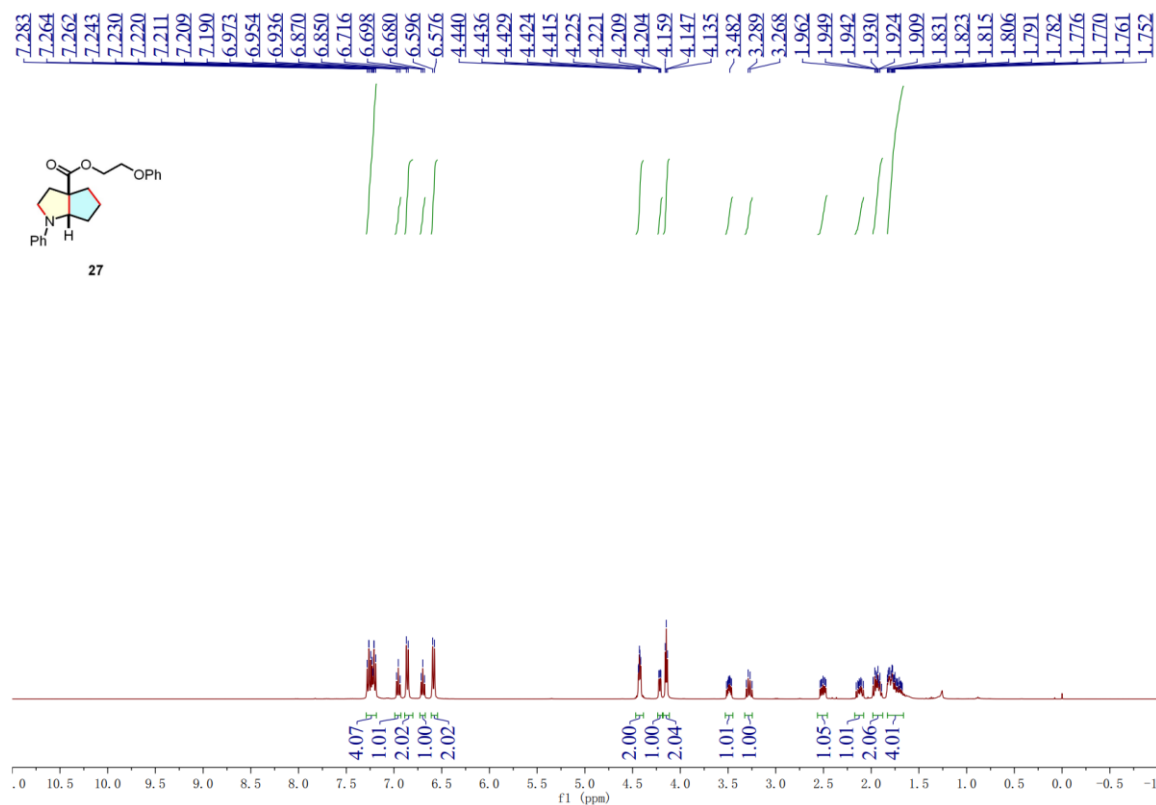

**<sup>1</sup>H NMR Spectrum of Compound 27 (400 MHz, CDCl<sub>3</sub>)**

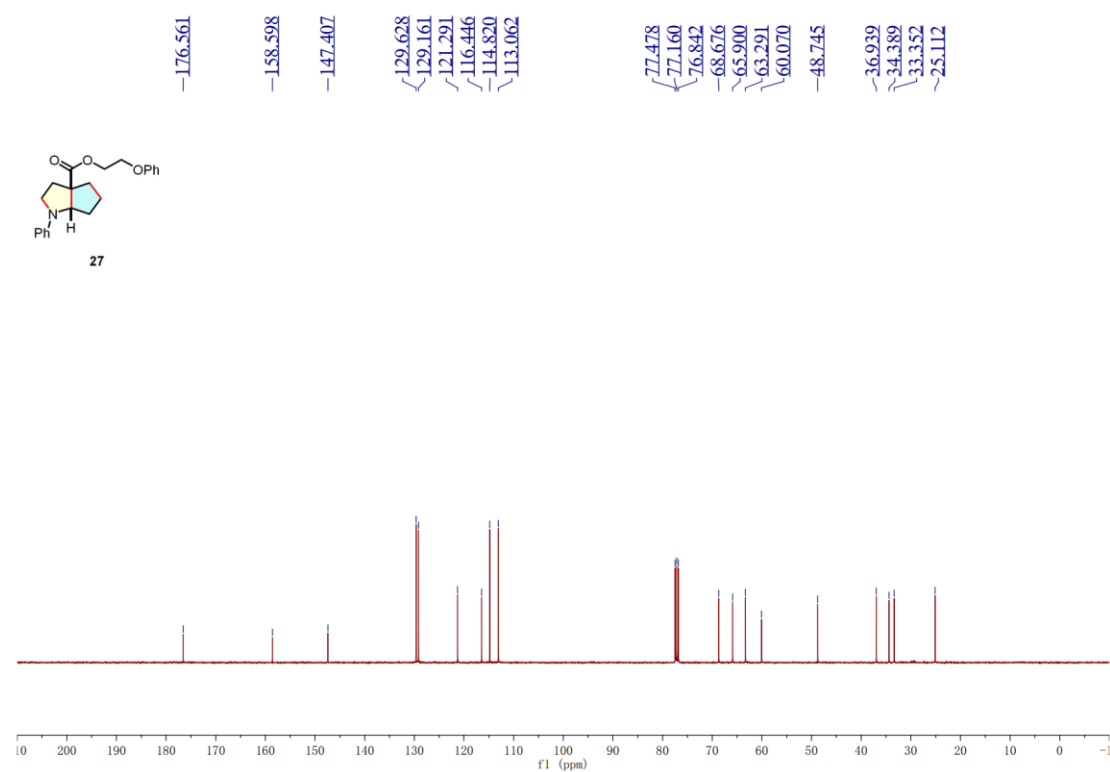

**<sup>13</sup>C{<sup>1</sup>H} NMR Spectrum of Compound 27 (100 MHz, CDCl<sub>3</sub>)**

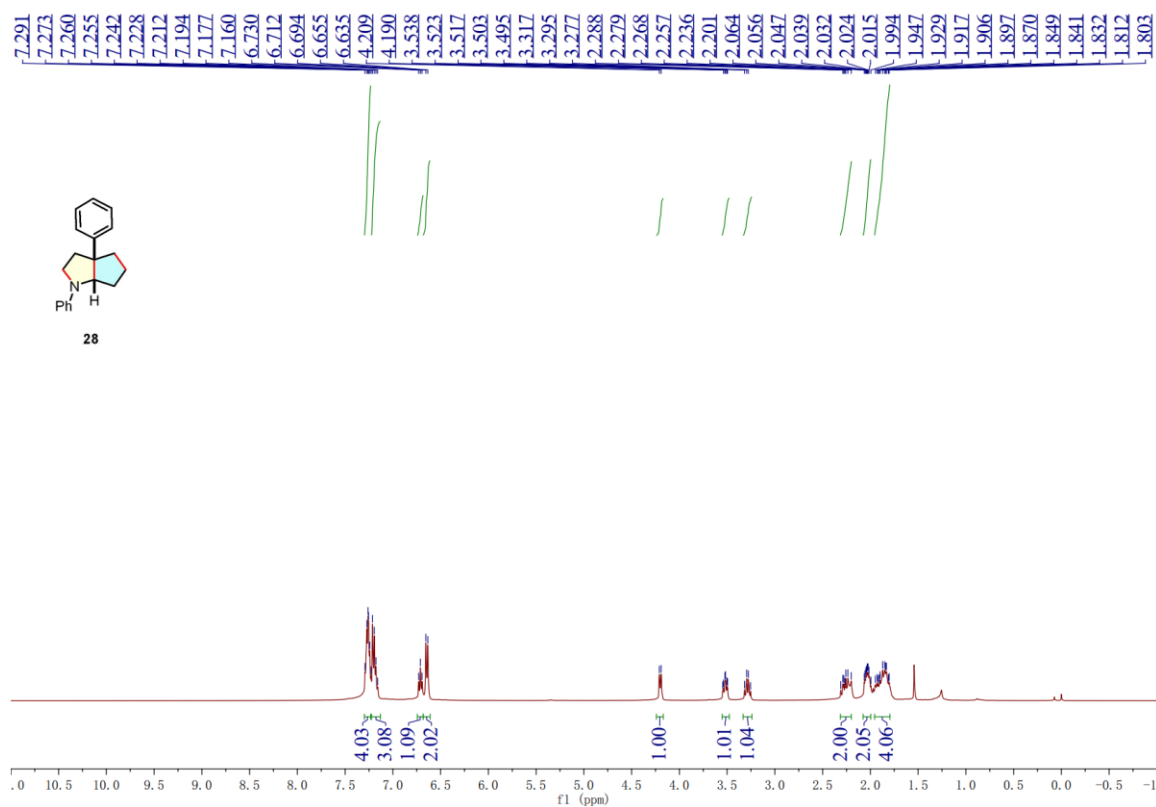

**<sup>1</sup>H NMR Spectrum of Compound **28** (400 MHz, CDCl<sub>3</sub>)**

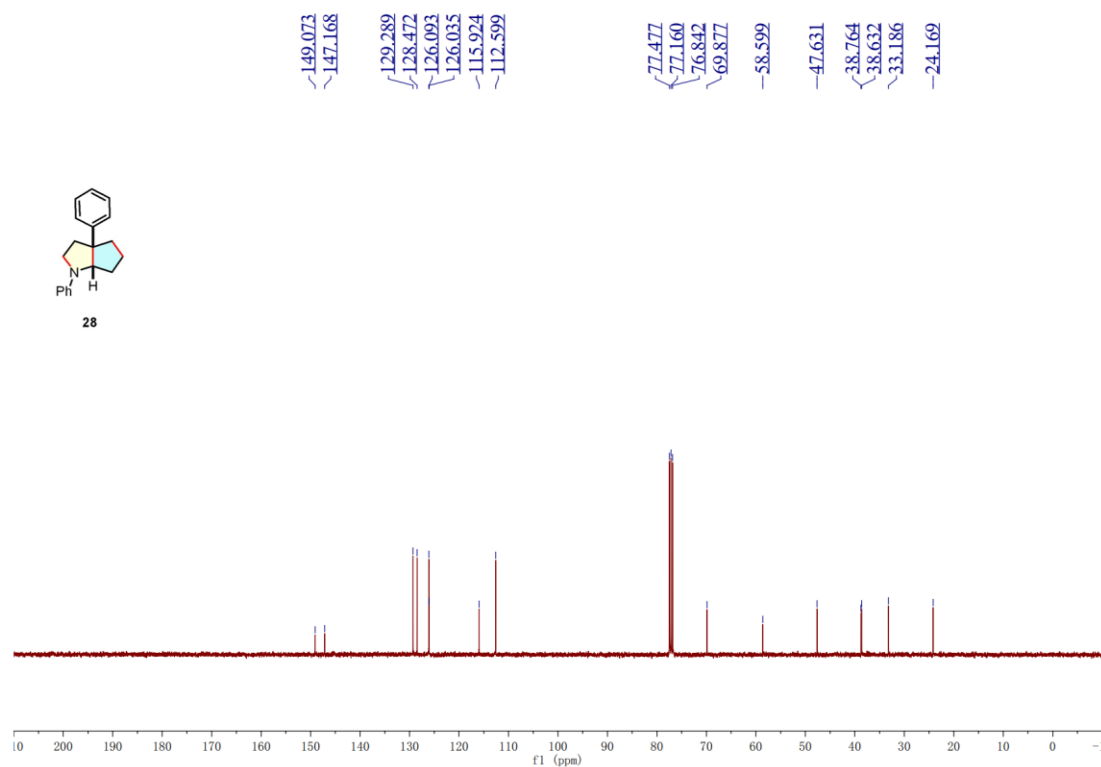

**<sup>13</sup>C{<sup>1</sup>H} NMR Spectrum of Compound **28** (100 MHz, CDCl<sub>3</sub>)**

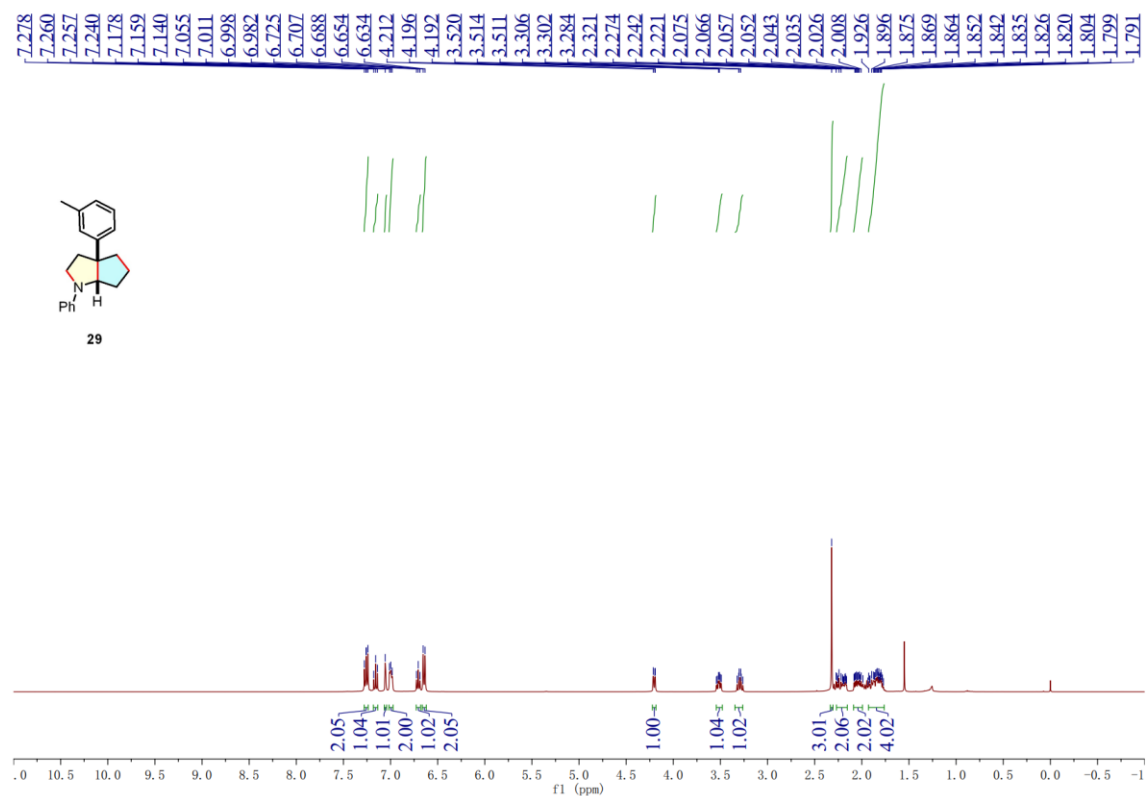

**<sup>1</sup>H NMR Spectrum of Compound **29** (400 MHz, CDCl<sub>3</sub>)**

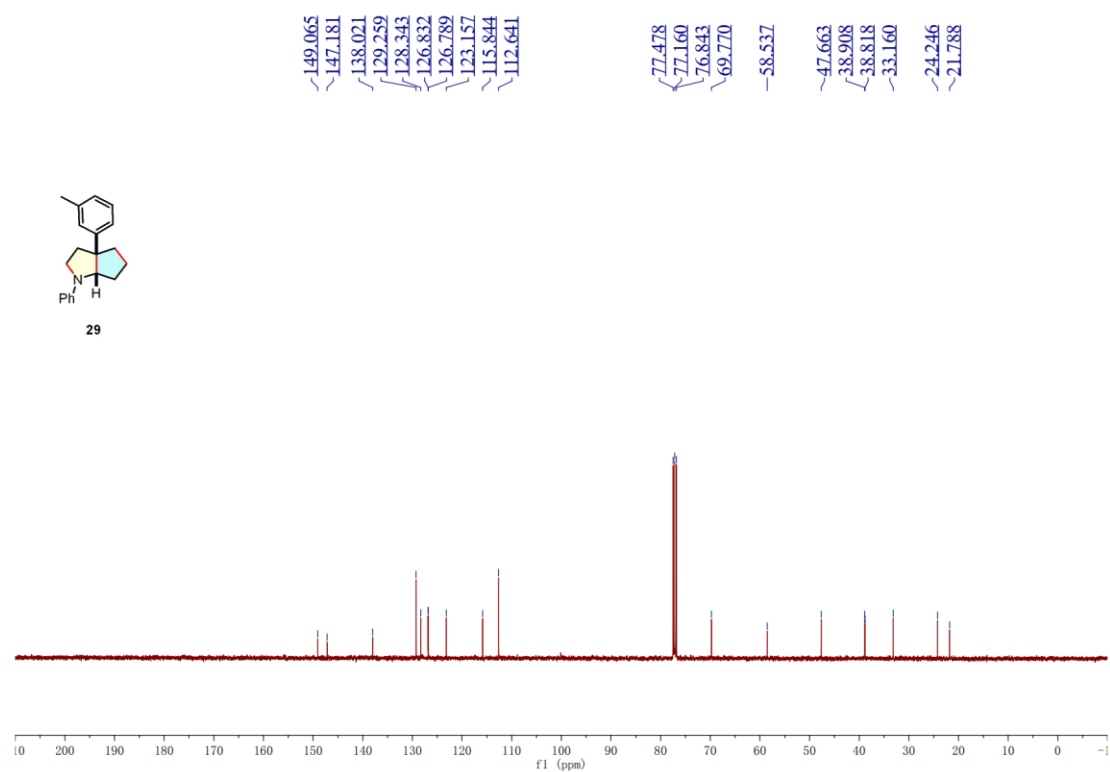

**<sup>13</sup>C{<sup>1</sup>H} NMR Spectrum of Compound **29** (100 MHz, CDCl<sub>3</sub>)**

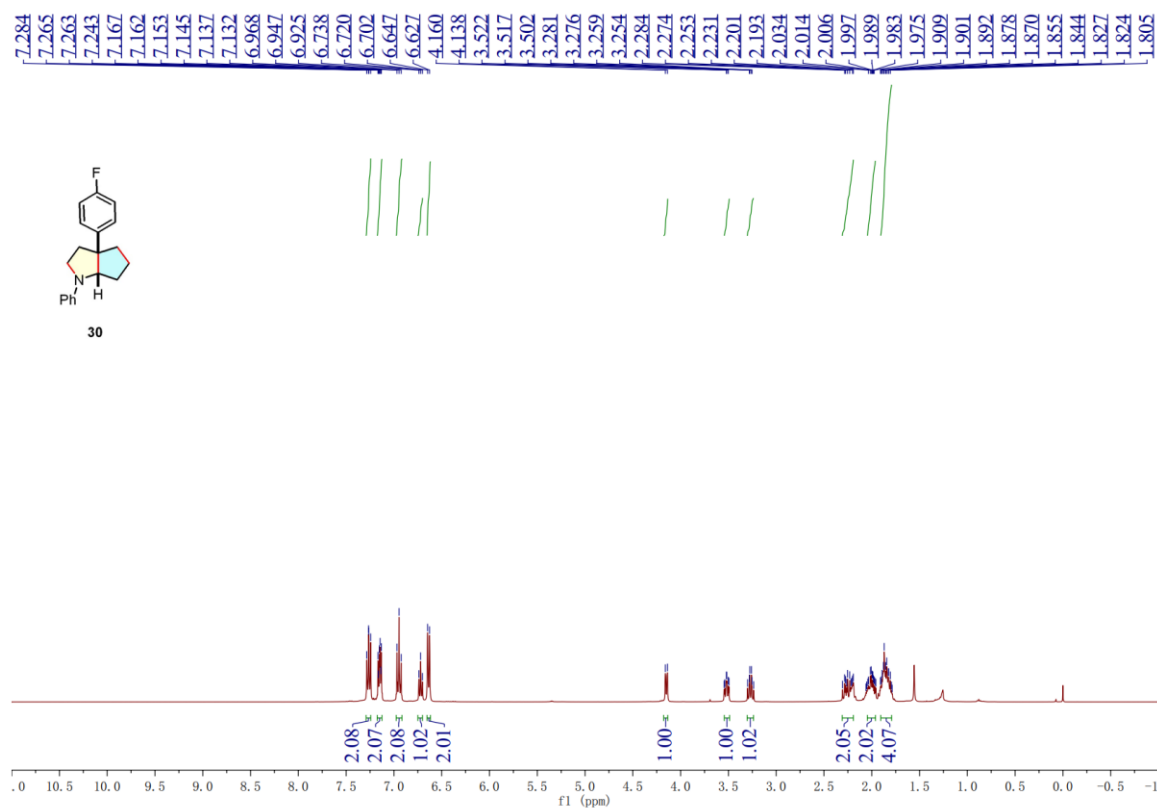

**<sup>1</sup>H NMR Spectrum of Compound **30** (400 MHz, CDCl<sub>3</sub>)**

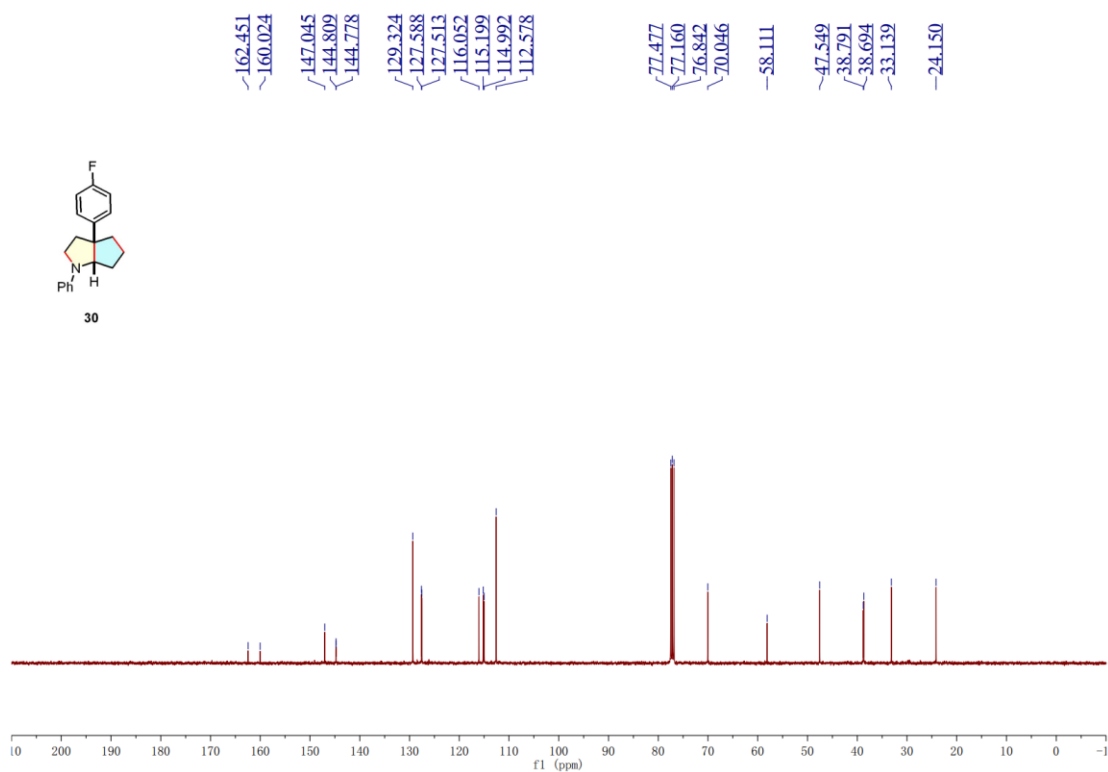

**<sup>13</sup>C{<sup>1</sup>H} NMR Spectrum of Compound **30** (100 MHz, CDCl<sub>3</sub>)**

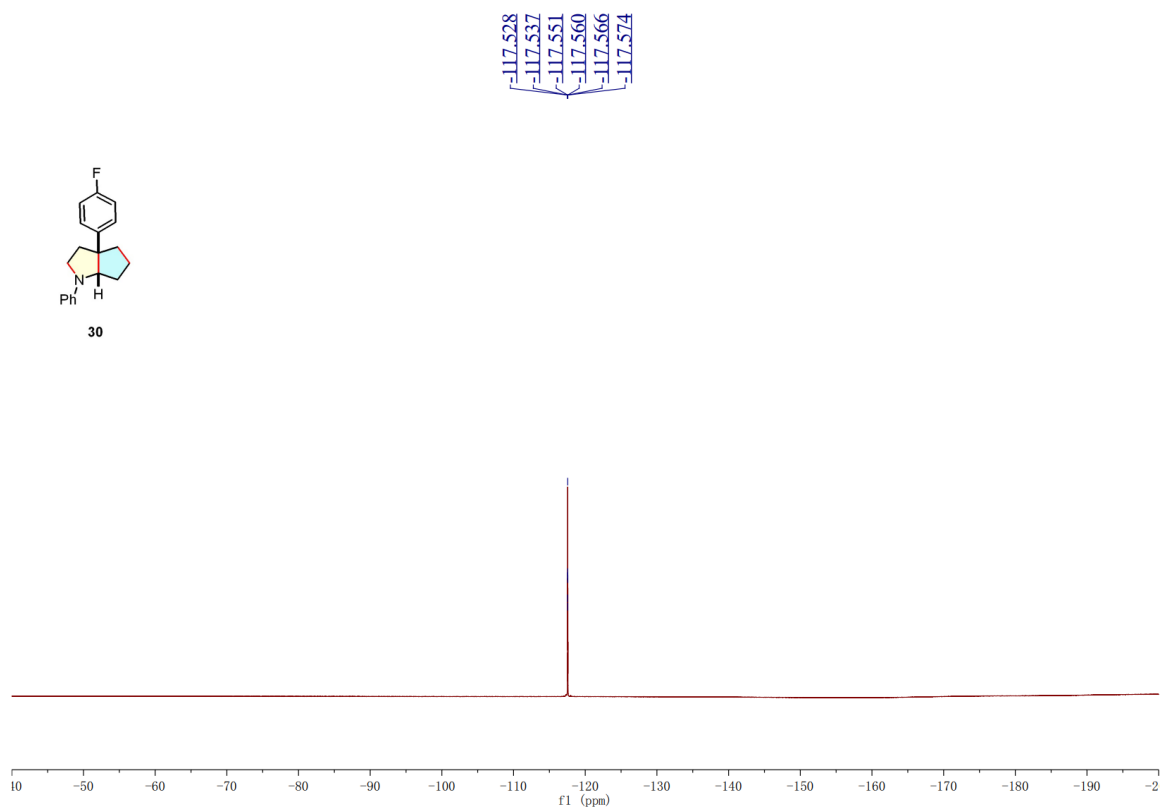

<sup>19</sup>F{<sup>1</sup>H} NMR Spectrum of Compound **30** (376 MHz, CDCl<sub>3</sub>)

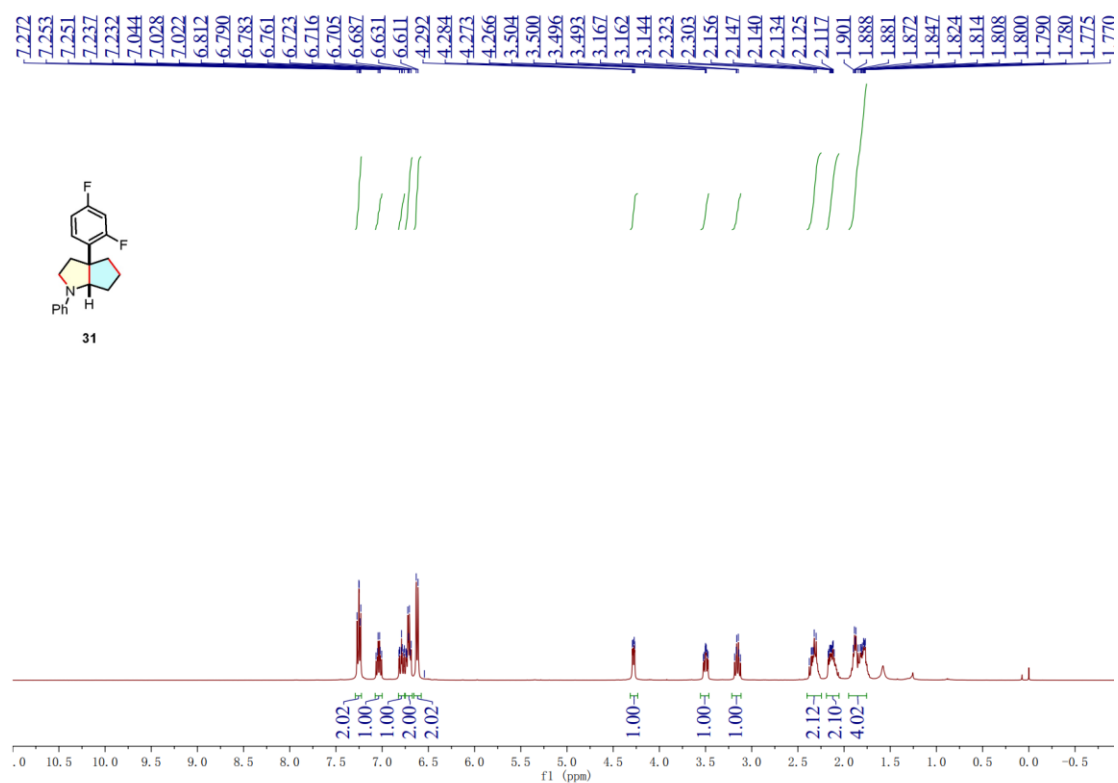

<sup>1</sup>H NMR Spectrum of Compound **31** (400 MHz, CDCl<sub>3</sub>)

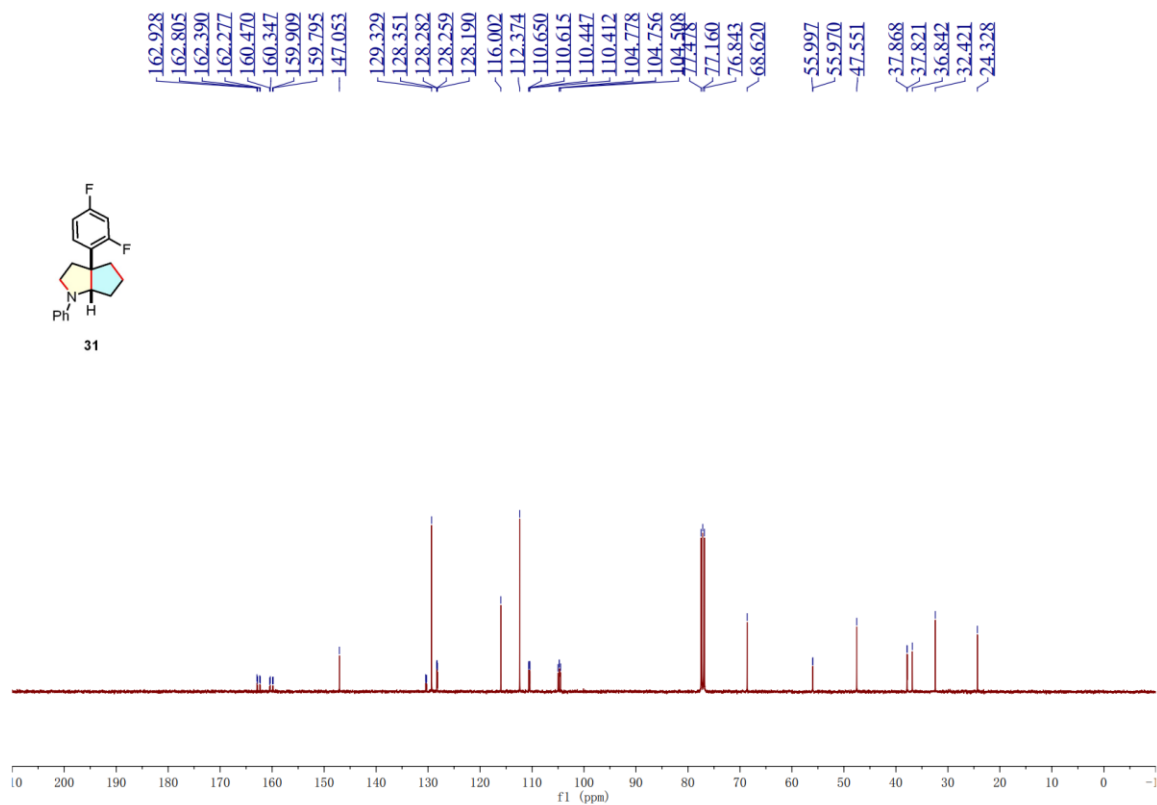

$^{13}\text{C}\{^1\text{H}\}$  NMR Spectrum of Compound **31** (100 MHz,  $\text{CDCl}_3$ )

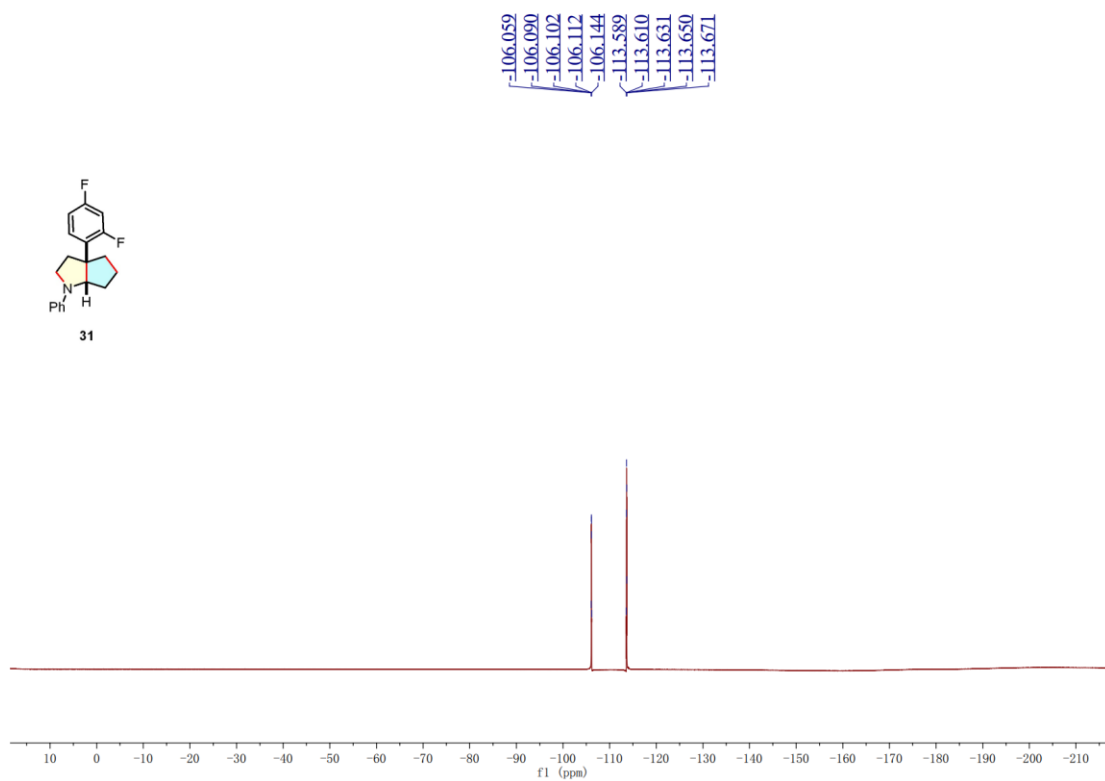

$^{19}\text{F}\{^1\text{H}\}$  NMR Spectrum of Compound **31** (376 MHz,  $\text{CDCl}_3$ )

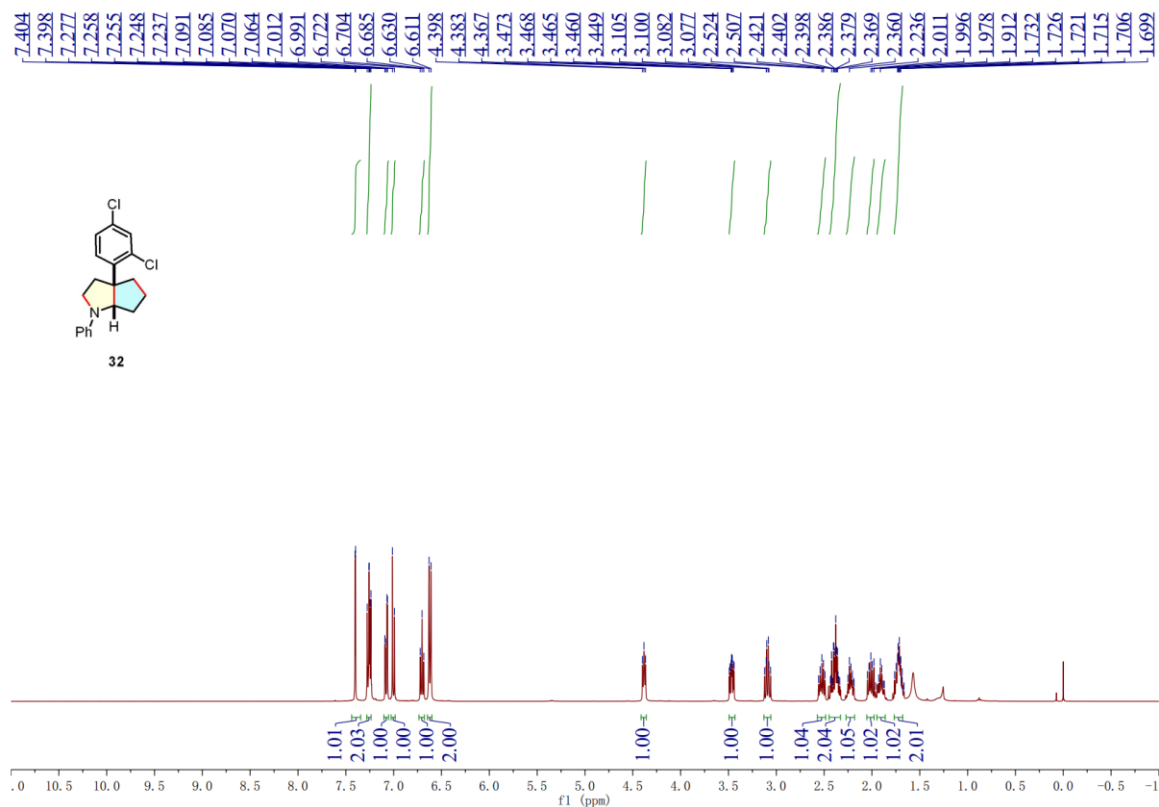

**<sup>1</sup>H NMR Spectrum of Compound **32** (400 MHz, CDCl<sub>3</sub>)**

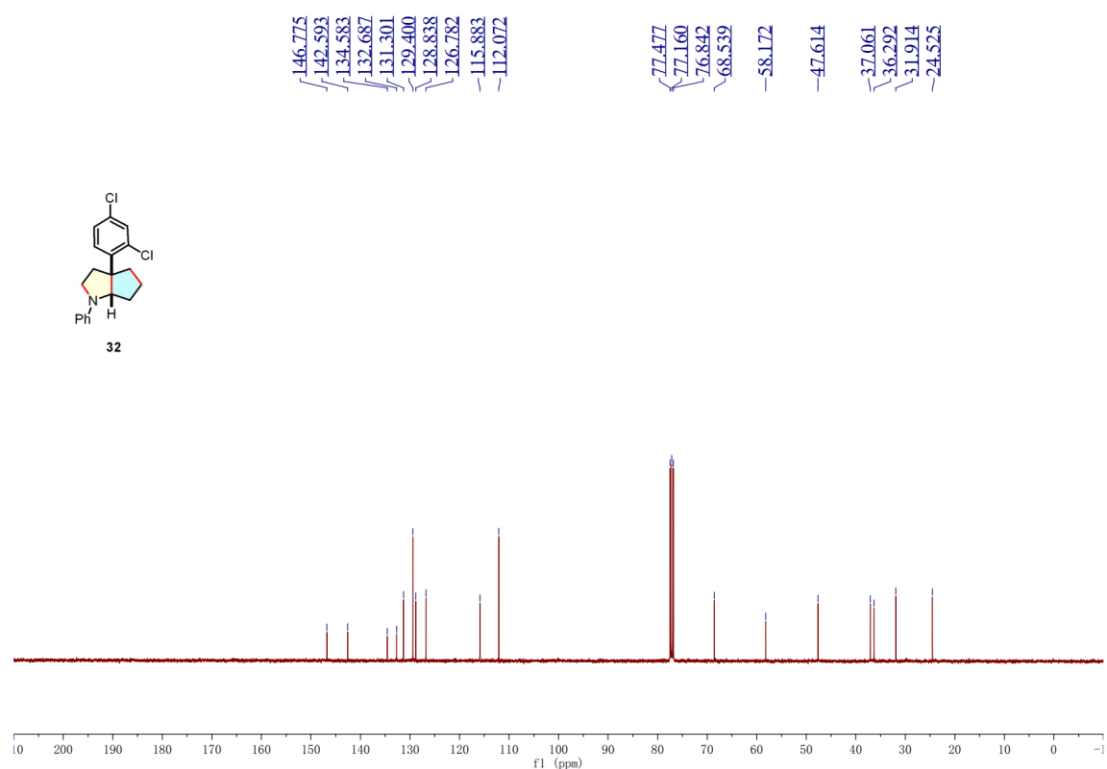

**<sup>13</sup>C {<sup>1</sup>H} NMR Spectrum of Compound **32** (100 MHz, CDCl<sub>3</sub>)**



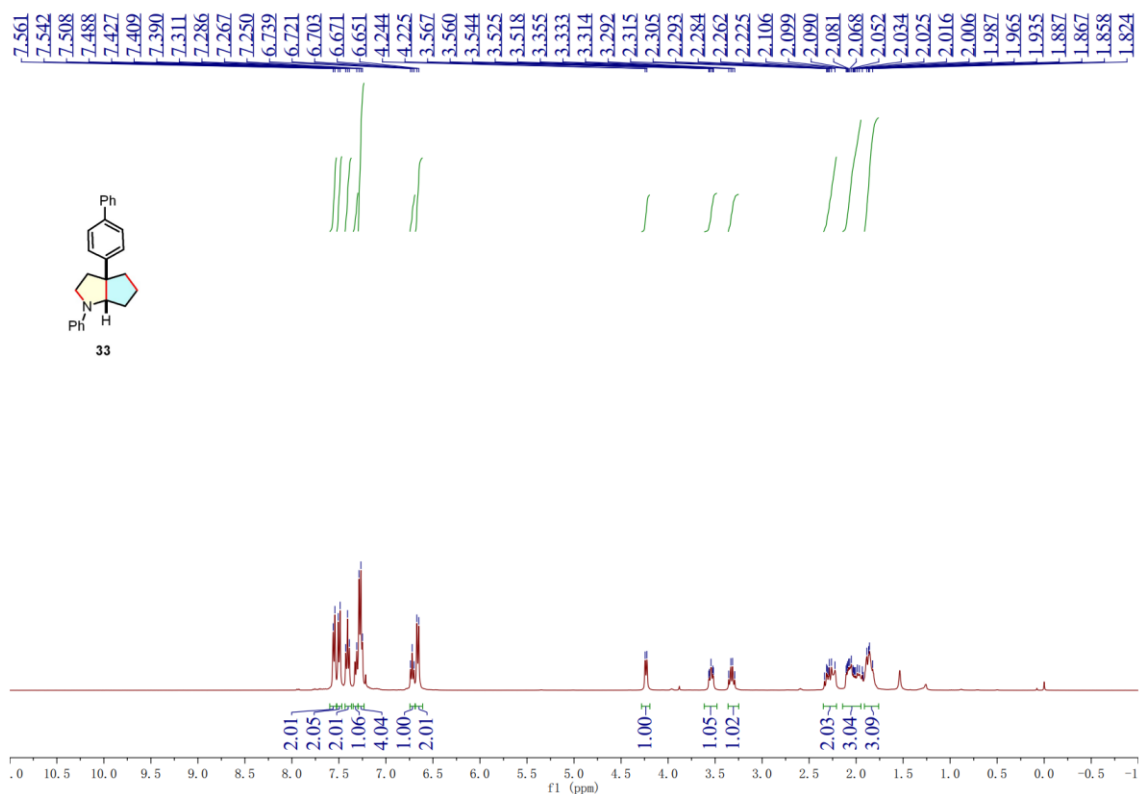

**<sup>1</sup>H NMR Spectrum of Compound **33** (400 MHz, CDCl<sub>3</sub>)**

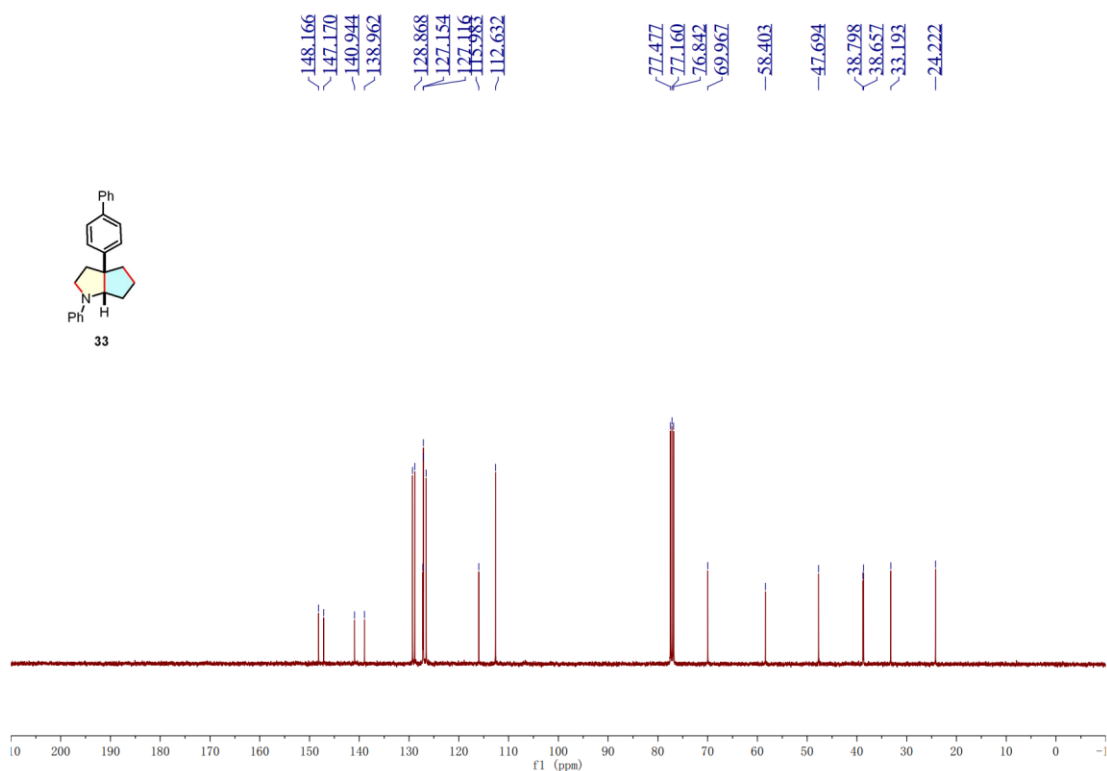

**<sup>13</sup>C{<sup>1</sup>H} NMR Spectrum of Compound **33** (100 MHz, CDCl<sub>3</sub>)**

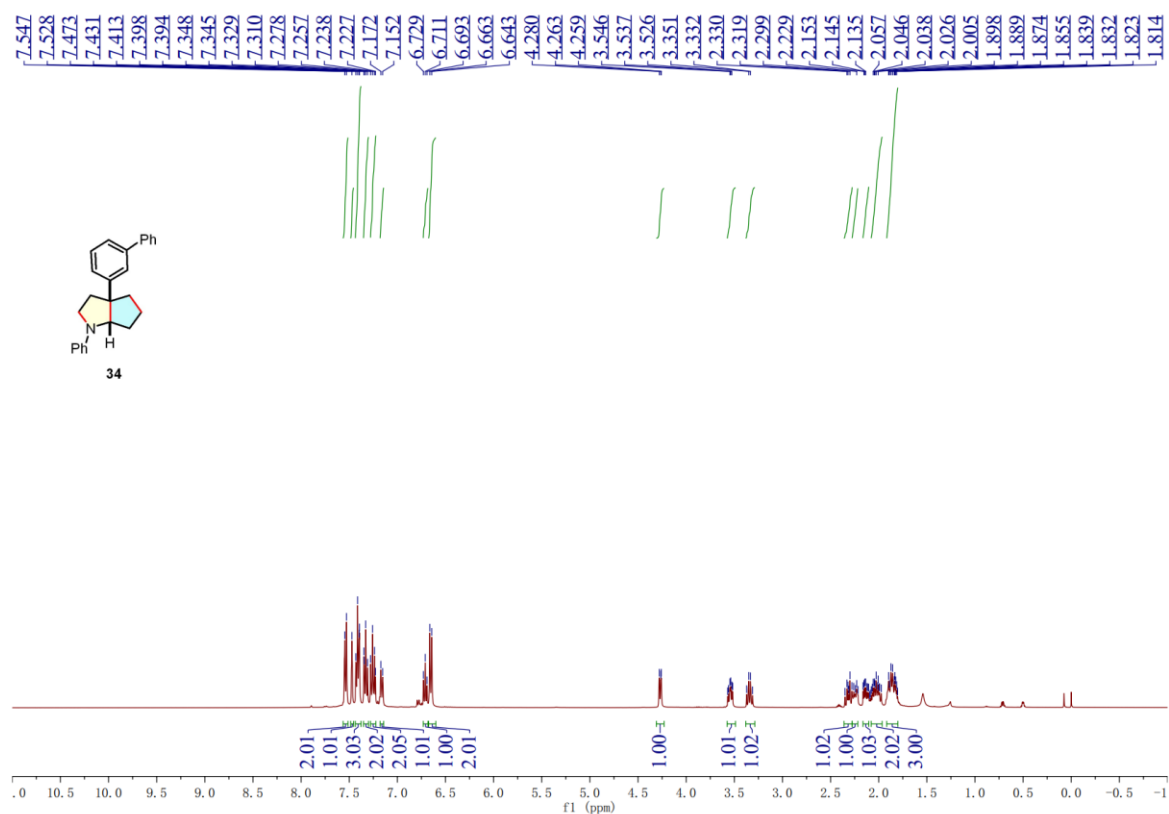

**<sup>1</sup>H NMR Spectrum of Compound **34** (400 MHz, CDCl<sub>3</sub>)**

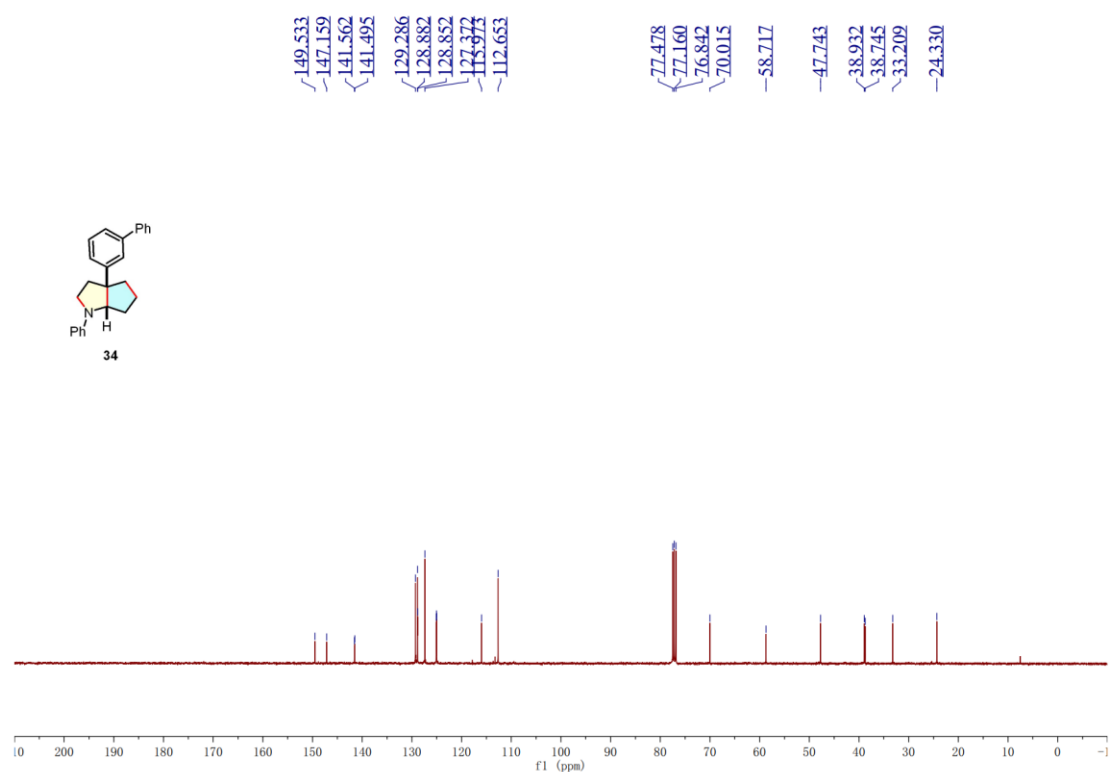

**<sup>13</sup>C{<sup>1</sup>H} NMR Spectrum of Compound **34** (100 MHz, CDCl<sub>3</sub>)**

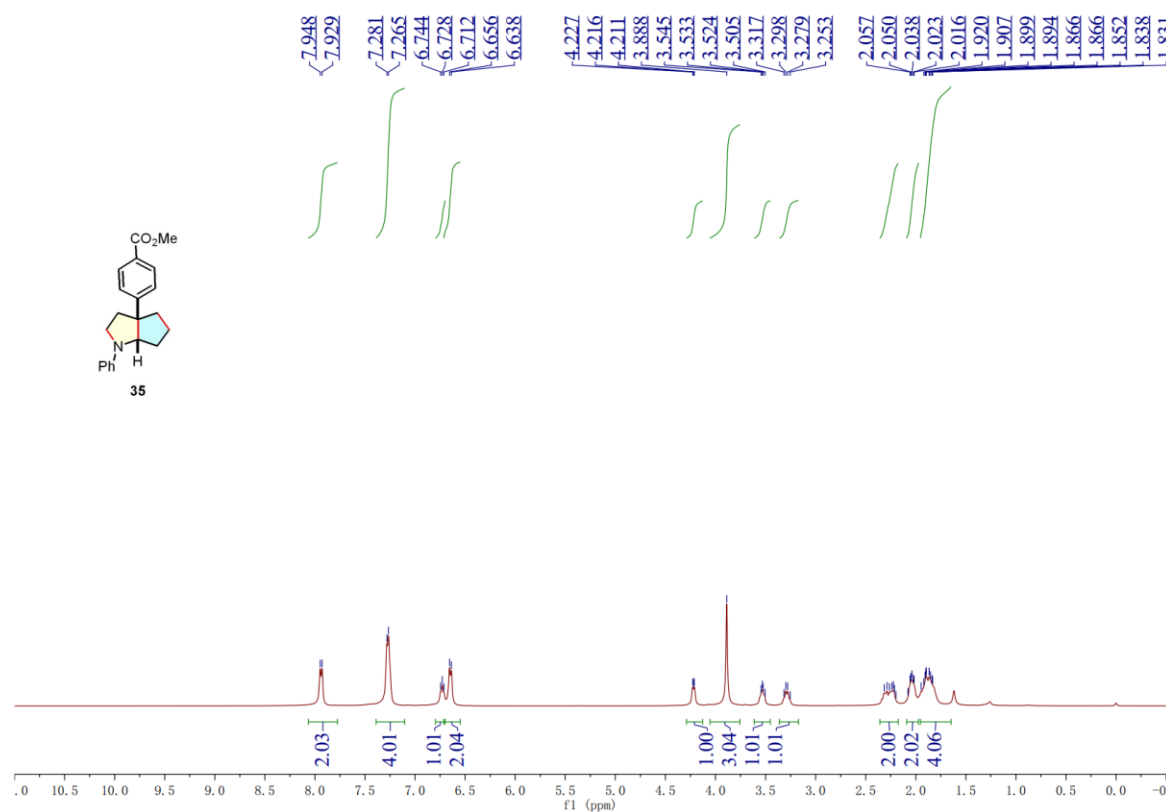

$^1\text{H}$  NMR Spectrum of Compound **35** (400 MHz,  $\text{CDCl}_3$ )

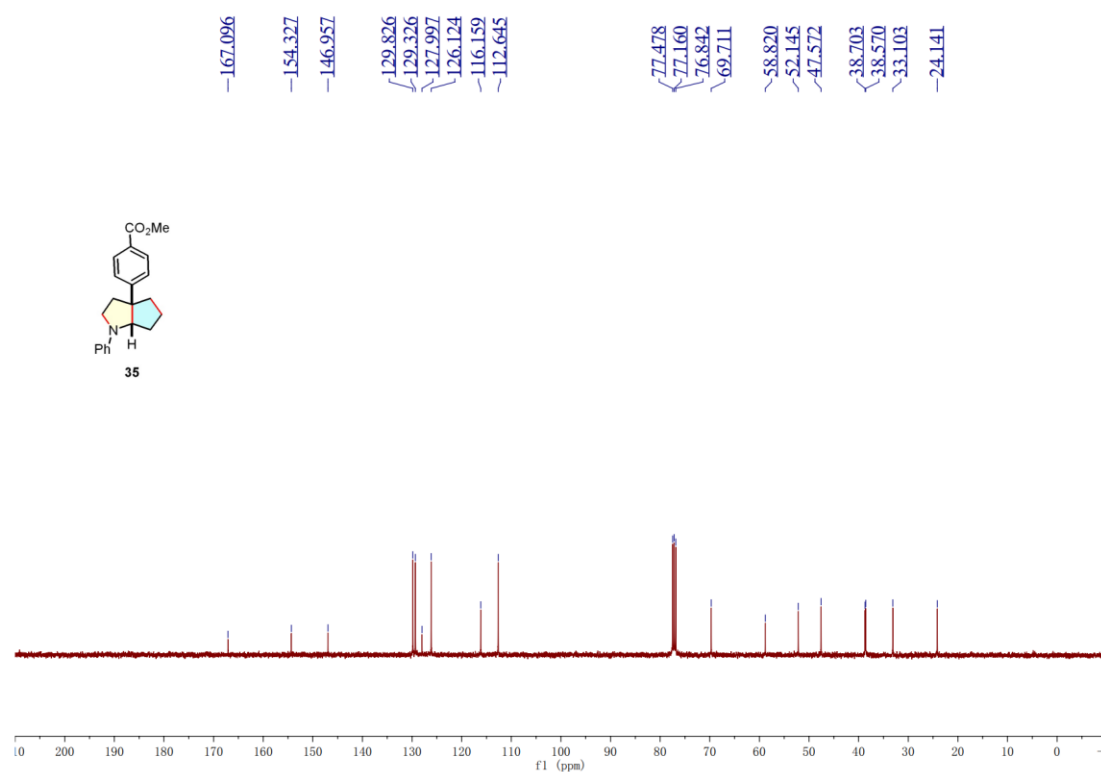

$^{13}\text{C}\{^1\text{H}\}$  NMR Spectrum of Compound **35** (100 MHz,  $\text{CDCl}_3$ )

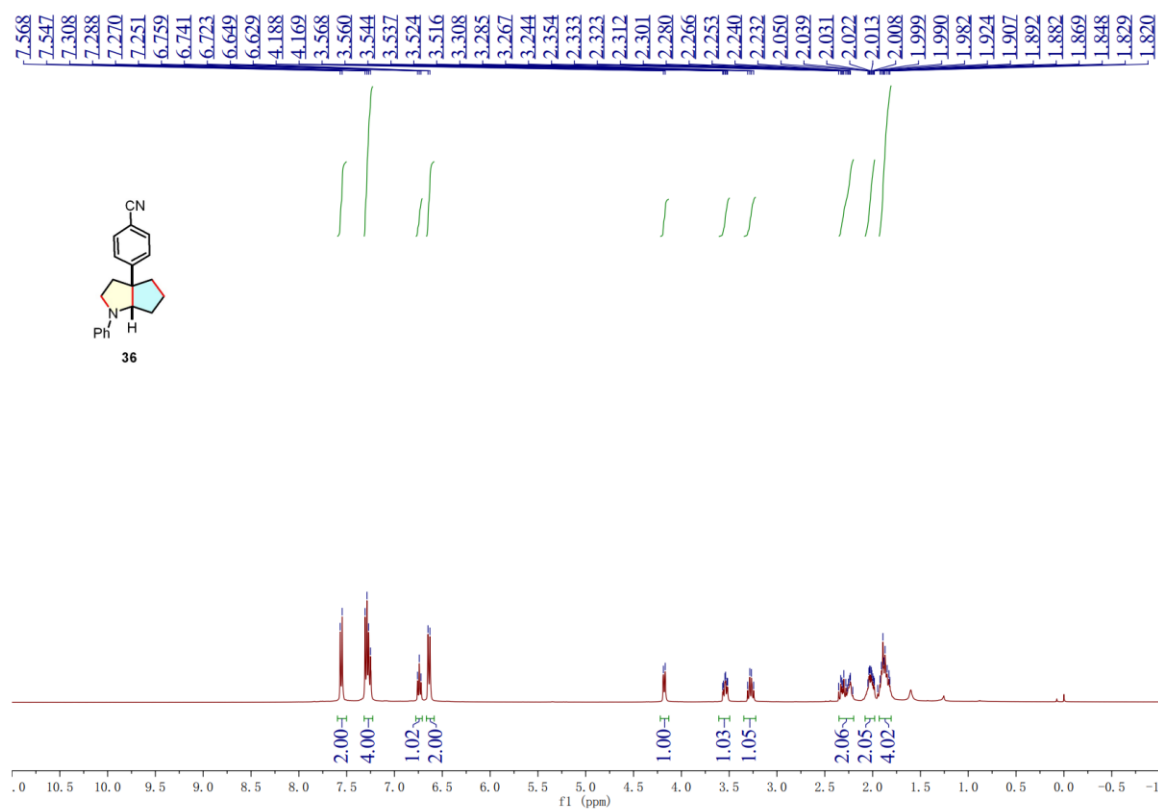

**<sup>1</sup>H NMR Spectrum of Compound **36** (400 MHz, CDCl<sub>3</sub>)**

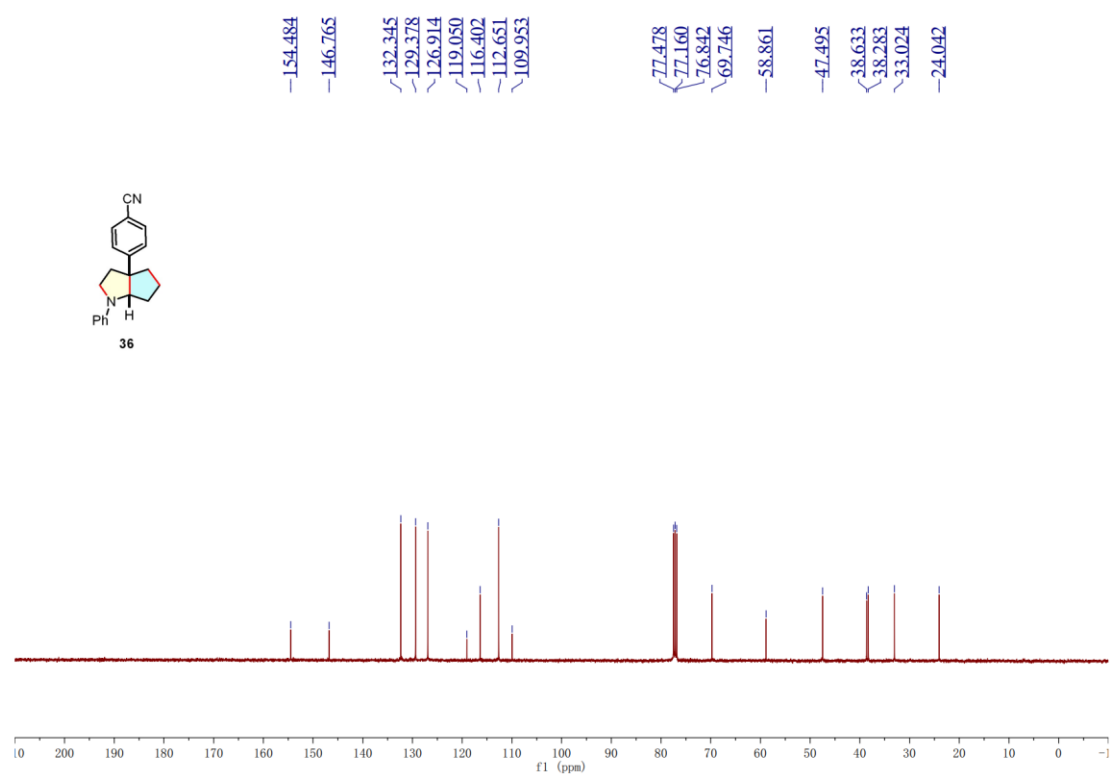

**<sup>13</sup>C{<sup>1</sup>H} NMR Spectrum of Compound **36** (100 MHz, CDCl<sub>3</sub>)**

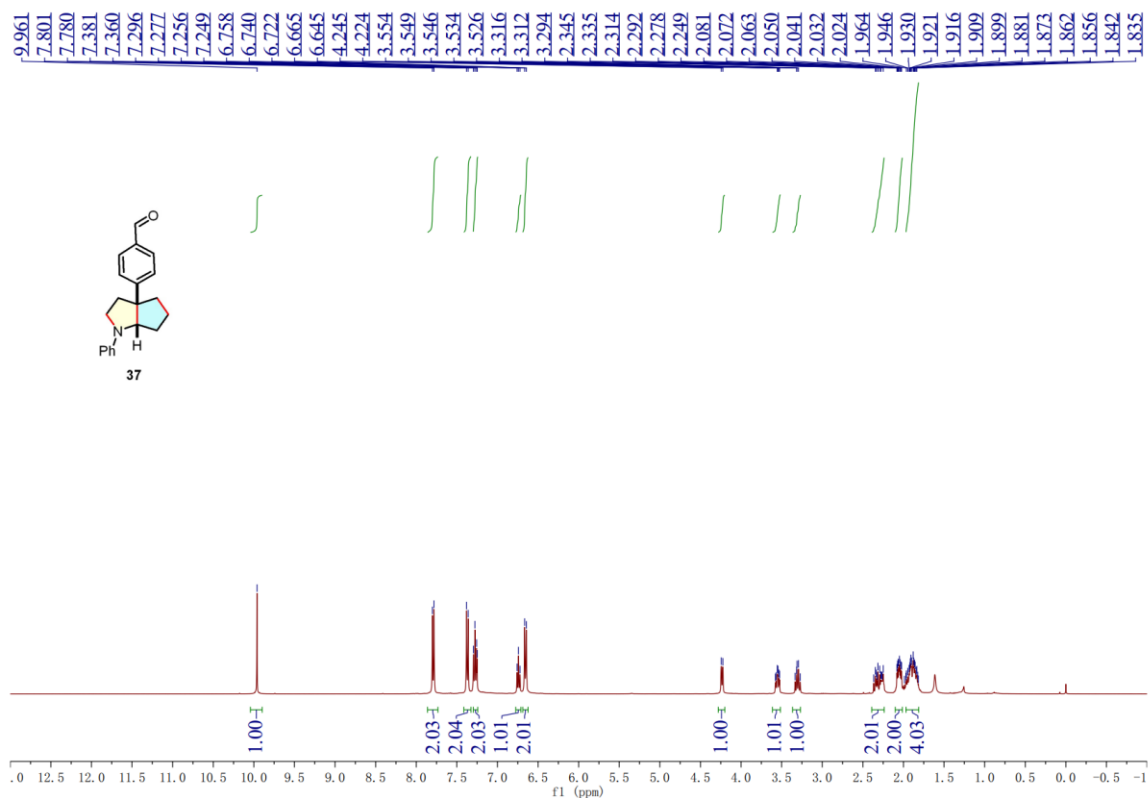

**<sup>1</sup>H NMR Spectrum of Compound **37** (400 MHz, CDCl<sub>3</sub>)**

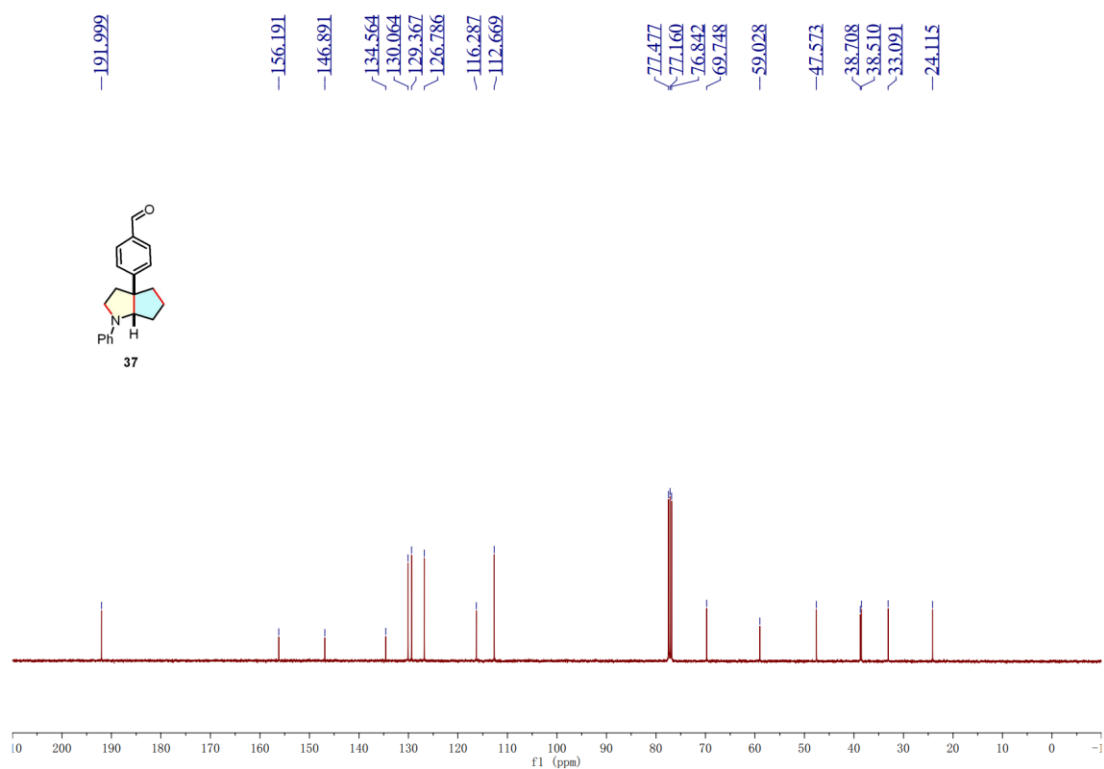

**<sup>13</sup>C {<sup>1</sup>H} NMR Spectrum of Compound **37** (100 MHz, CDCl<sub>3</sub>)**

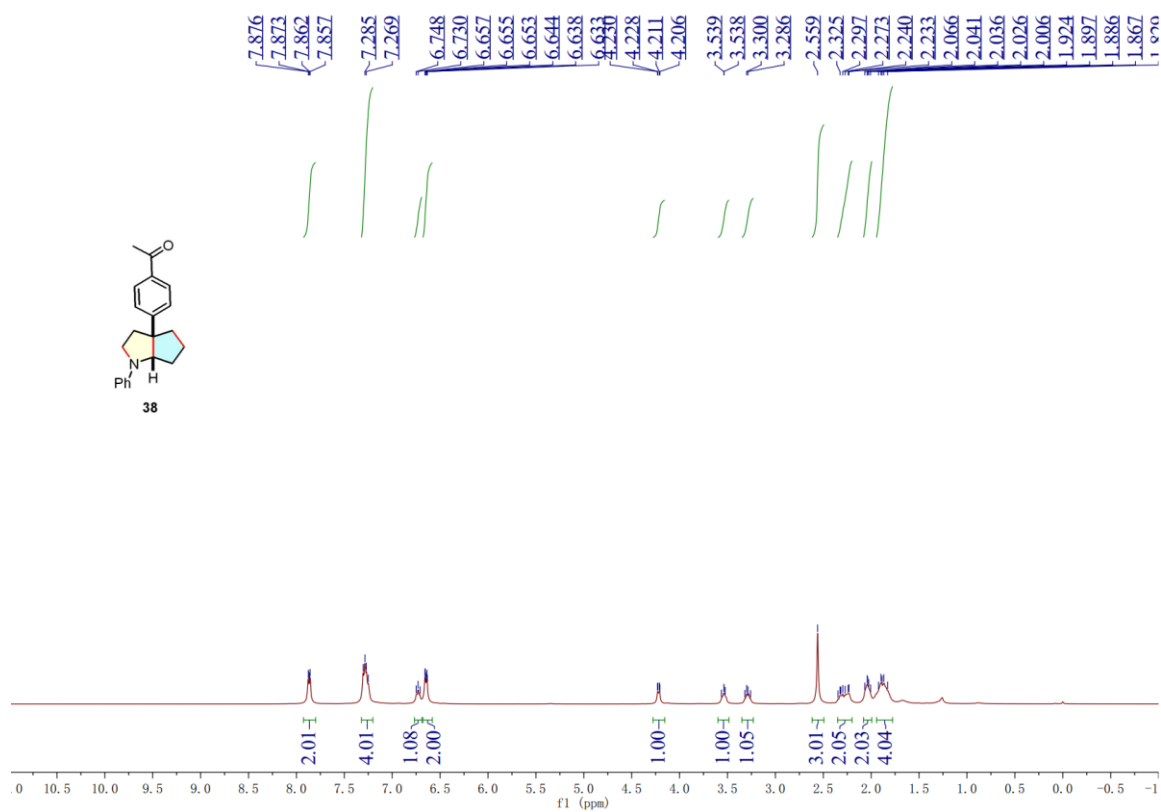

<sup>1</sup>H NMR Spectrum of Compound **38** (400 MHz, CDCl<sub>3</sub>)

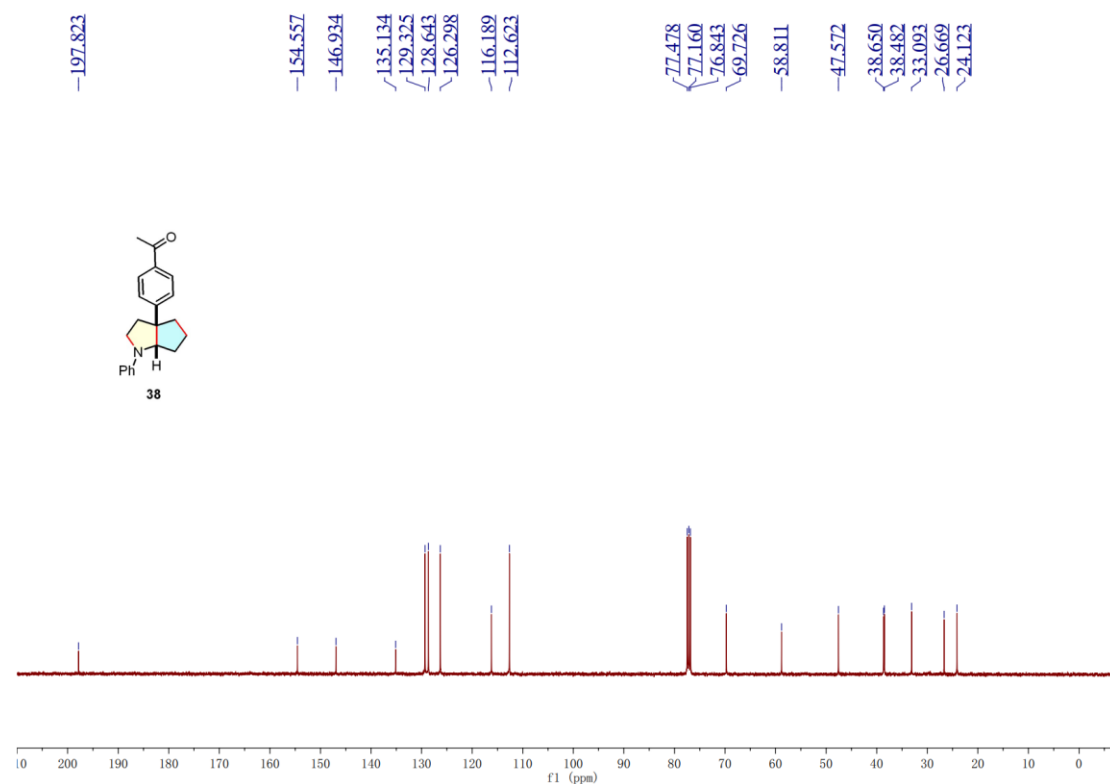

<sup>13</sup>C {<sup>1</sup>H} NMR Spectrum of Compound **38** (100 MHz, CDCl<sub>3</sub>)

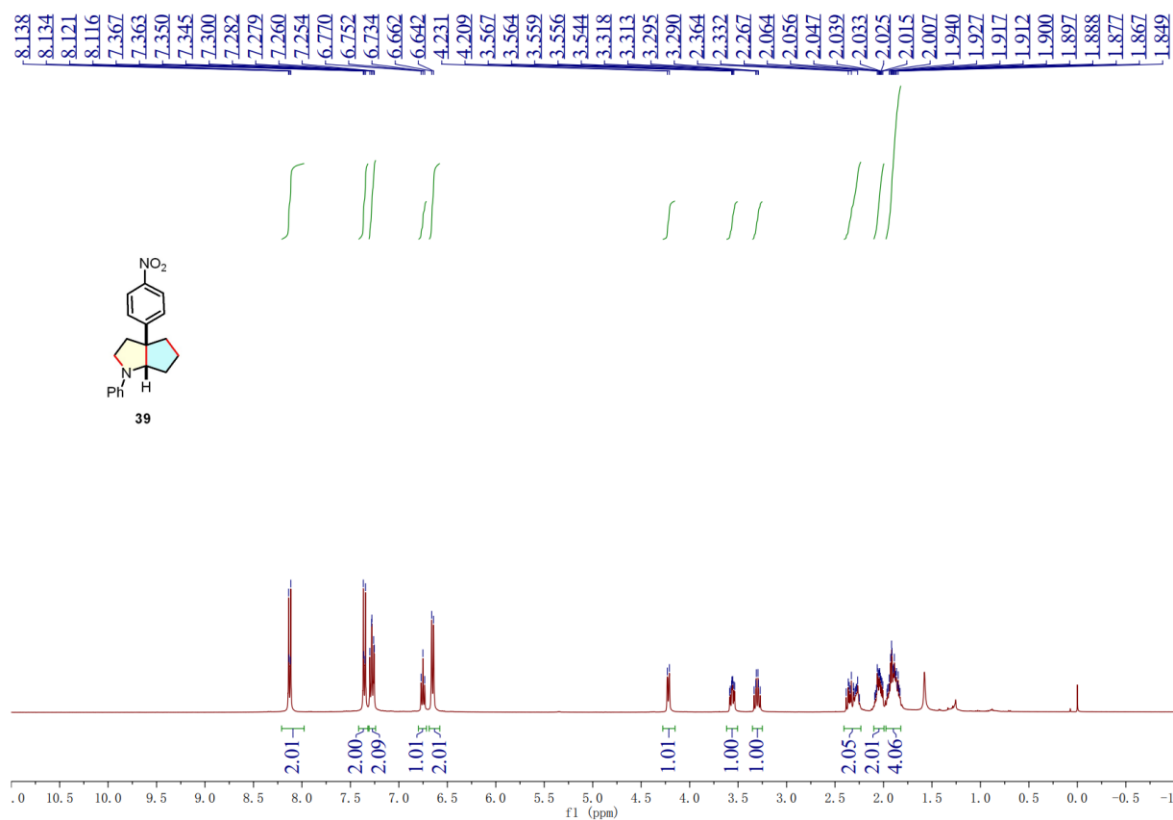

**<sup>1</sup>H NMR Spectrum of Compound 39 (400 MHz, CDCl<sub>3</sub>)**

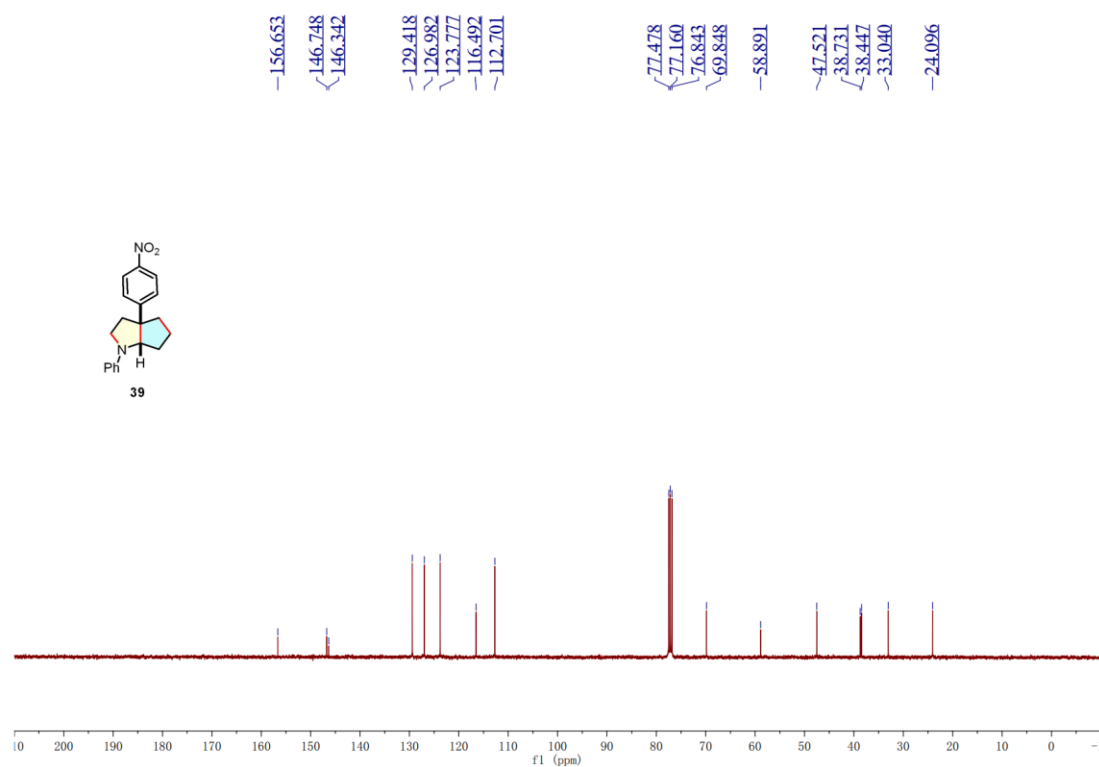

**<sup>13</sup>C{<sup>1</sup>H} NMR Spectrum of Compound 39 (100 MHz, CDCl<sub>3</sub>)**

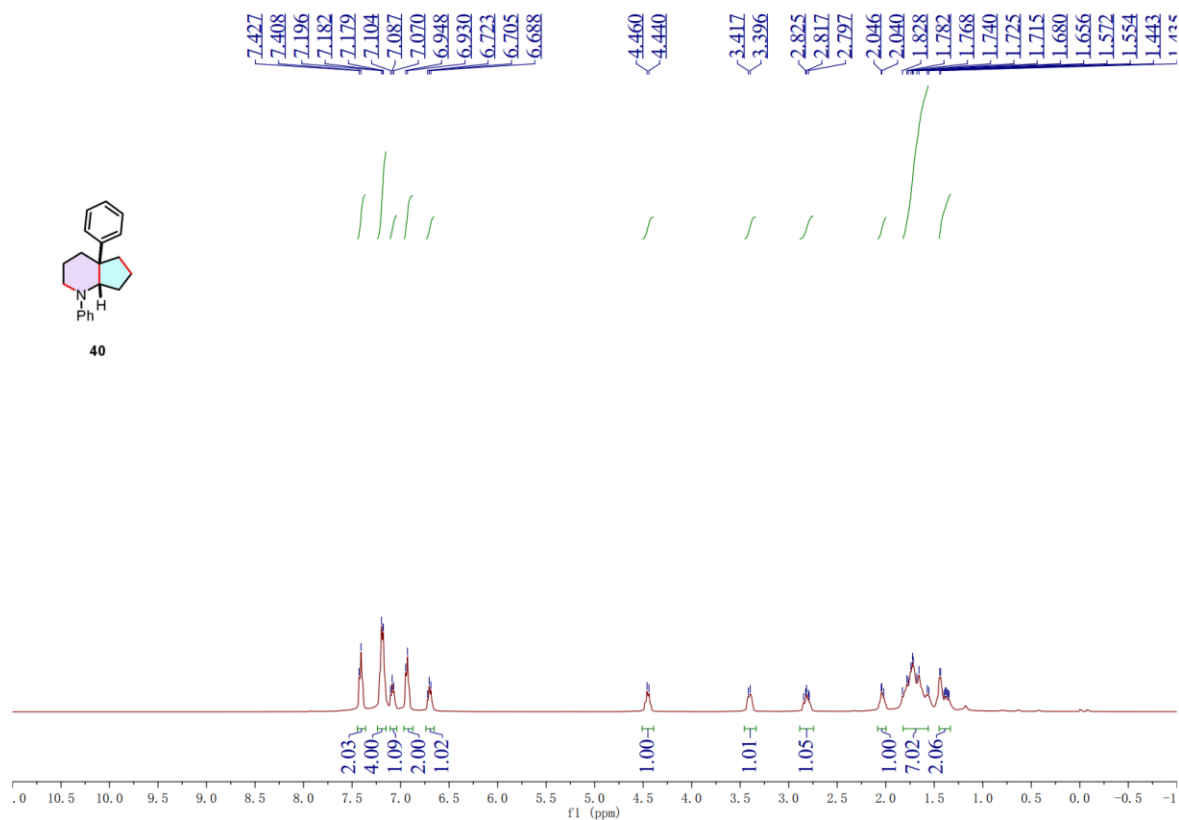

$^1\text{H}$  NMR Spectrum of Compound **40** (400 MHz,  $\text{CDCl}_3$ )

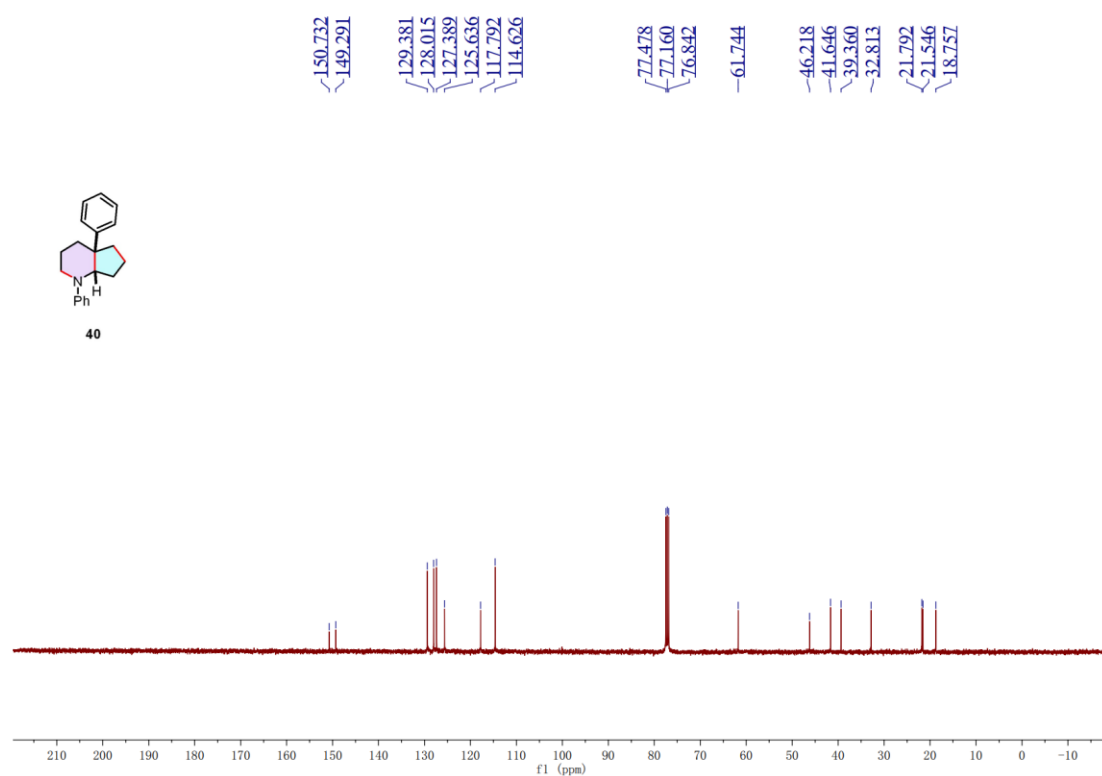

$^{13}\text{C}\{^1\text{H}\}$  NMR Spectrum of Compound **40** (100 MHz,  $\text{CDCl}_3$ )



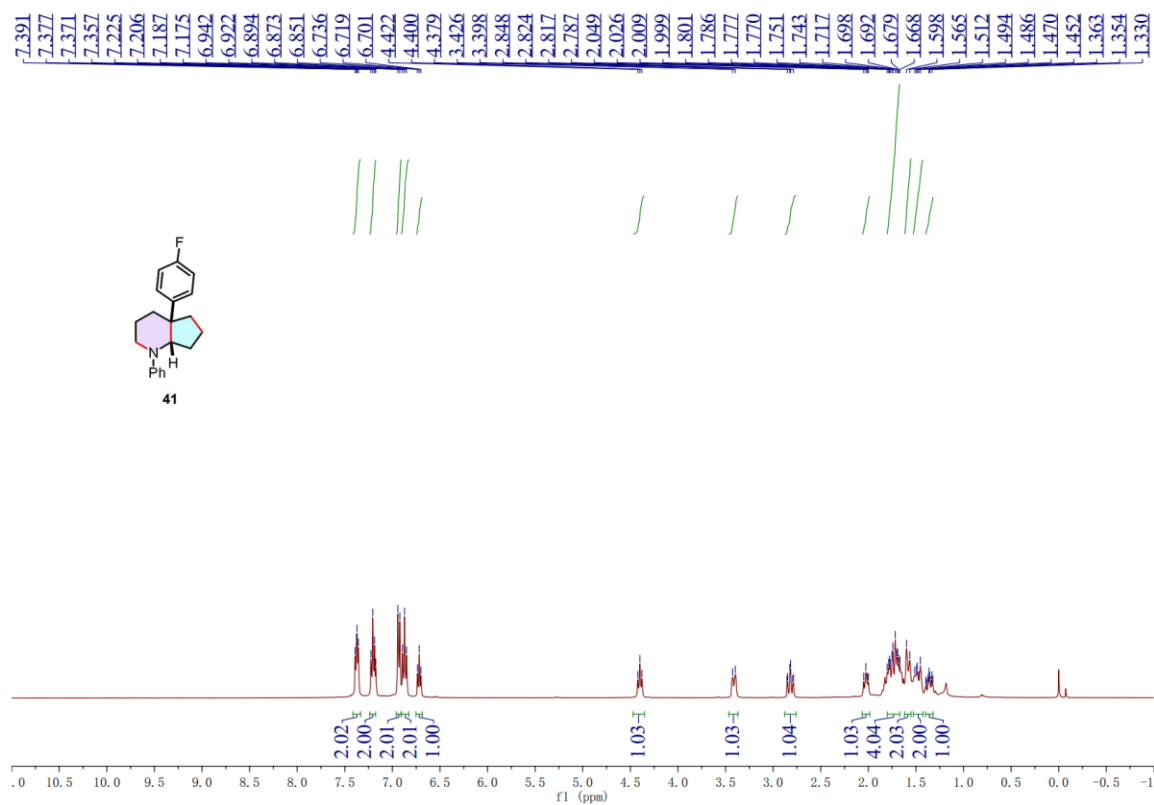

**<sup>1</sup>H NMR Spectrum of Compound **41** (400 MHz, CDCl<sub>3</sub>)**

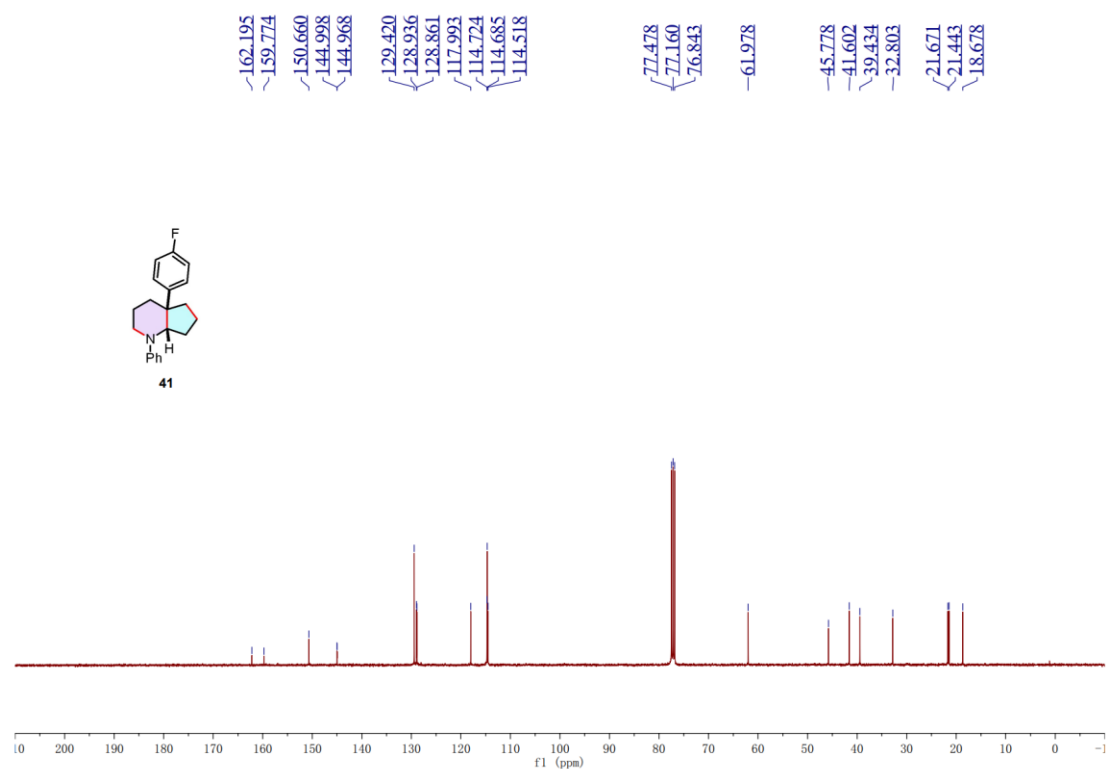

**<sup>13</sup>C{<sup>1</sup>H} NMR Spectrum of Compound **41** (100 MHz, CDCl<sub>3</sub>)**

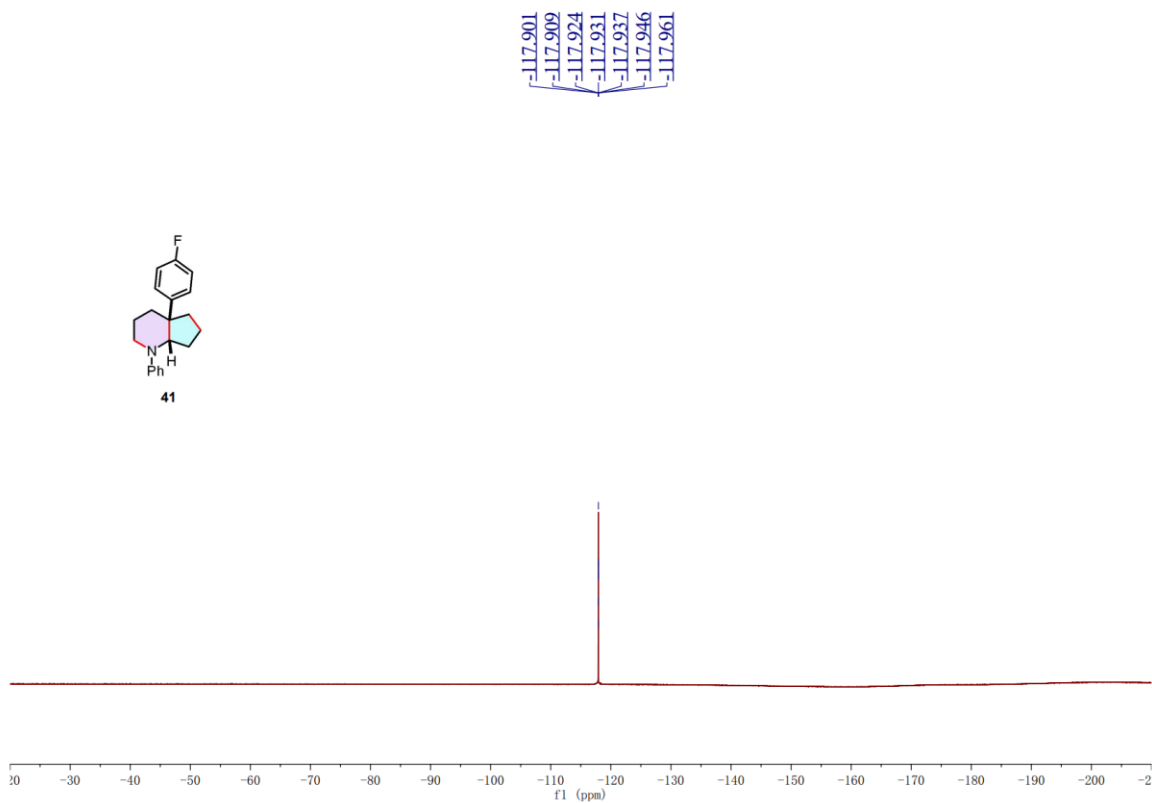

$^{19}\text{F}\{^1\text{H}\}$  NMR Spectrum of Compound **41** (376 MHz,  $\text{CDCl}_3$ )

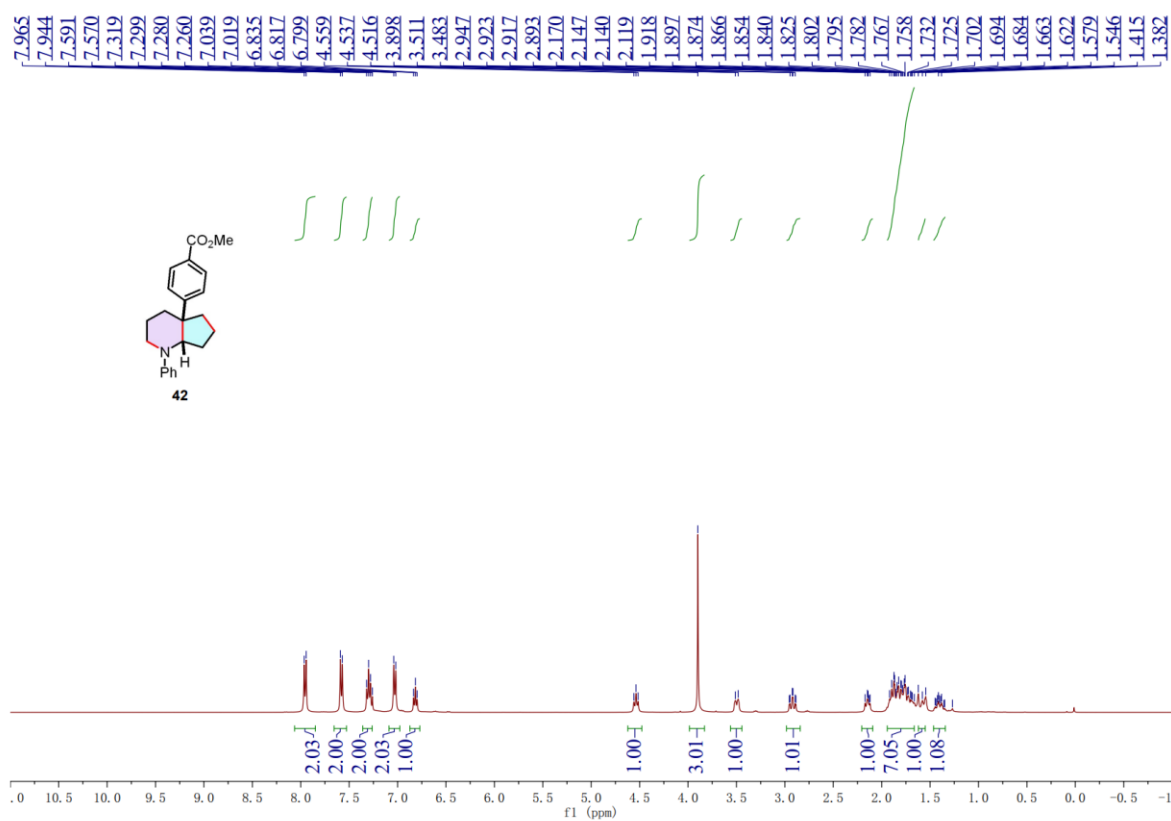

$^1\text{H}$  NMR Spectrum of Compound **42** (400 MHz,  $\text{CDCl}_3$ )

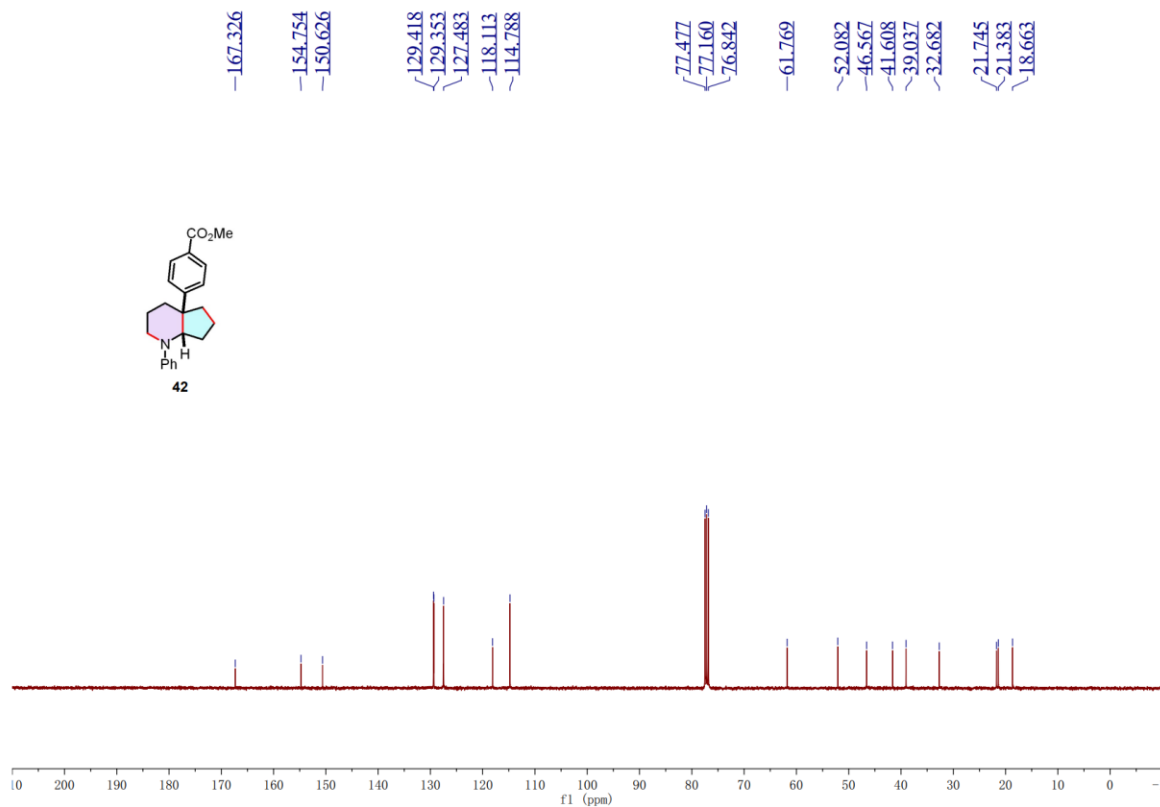

<sup>13</sup>C {<sup>1</sup>H} NMR Spectrum of Compound **42** (100 MHz, CDCl<sub>3</sub>)

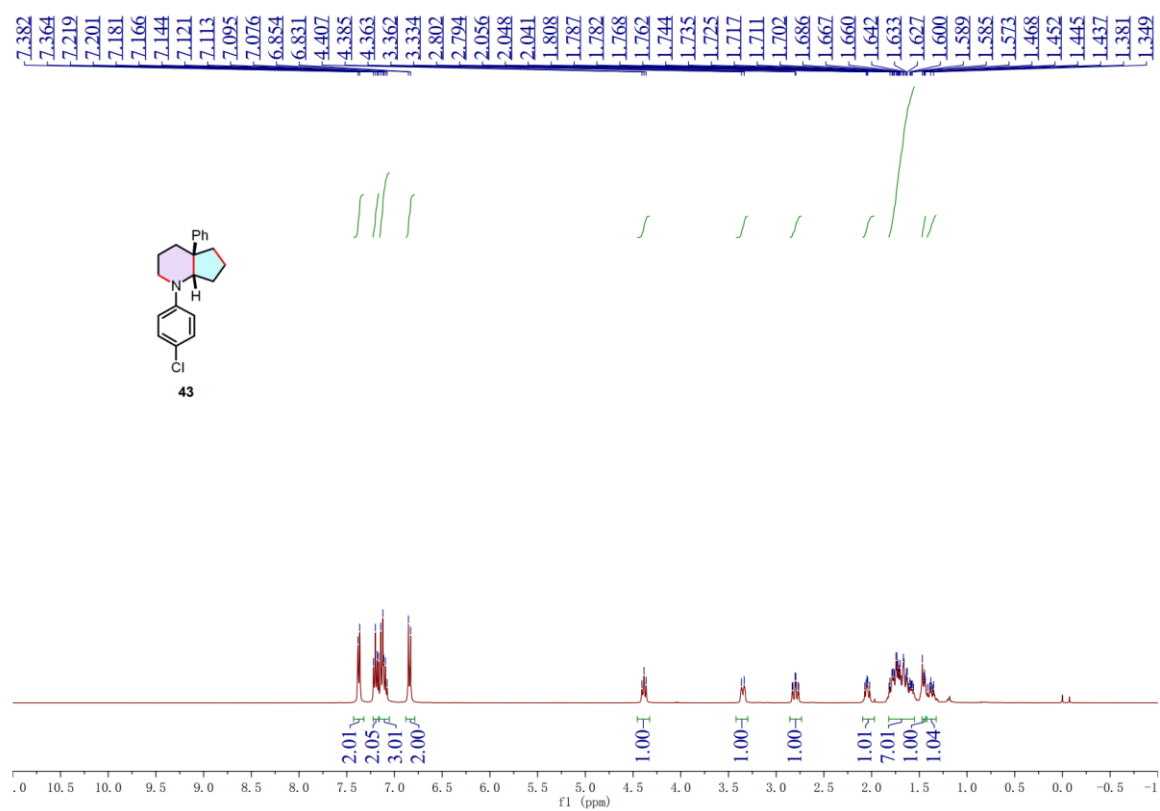

<sup>1</sup>H NMR Spectrum of Compound **43** (400 MHz, CDCl<sub>3</sub>)

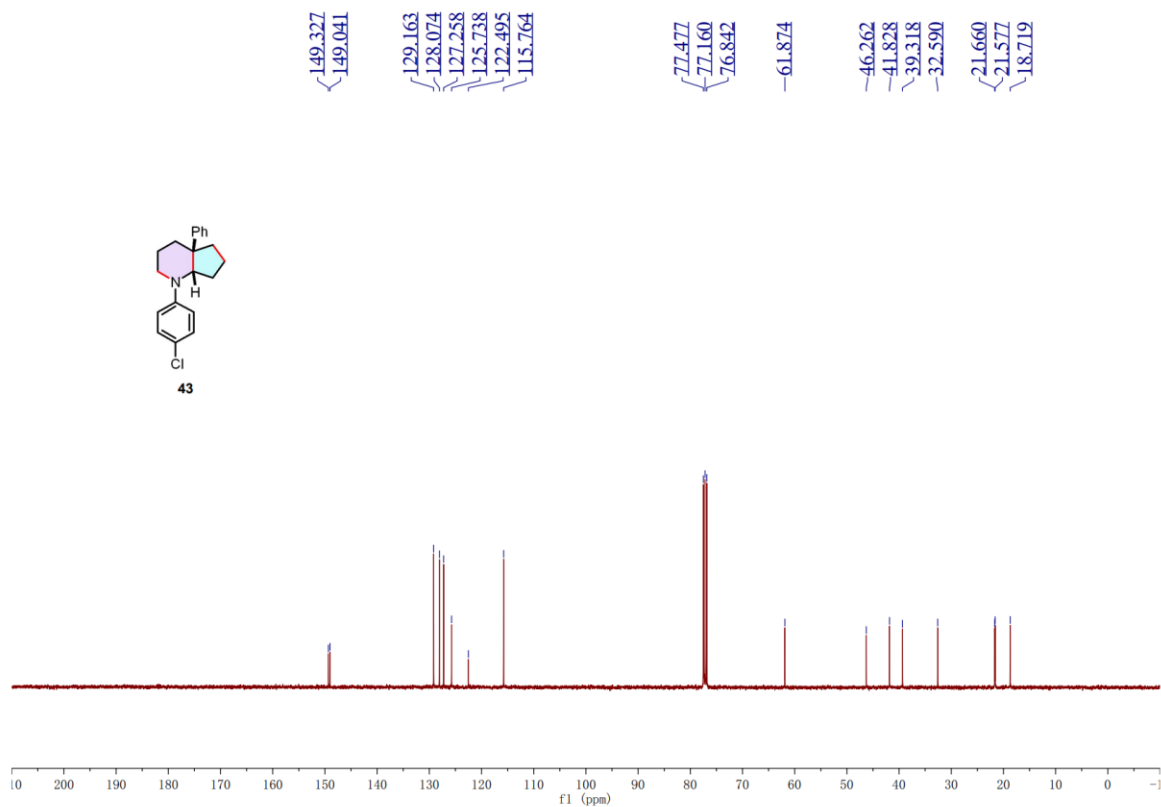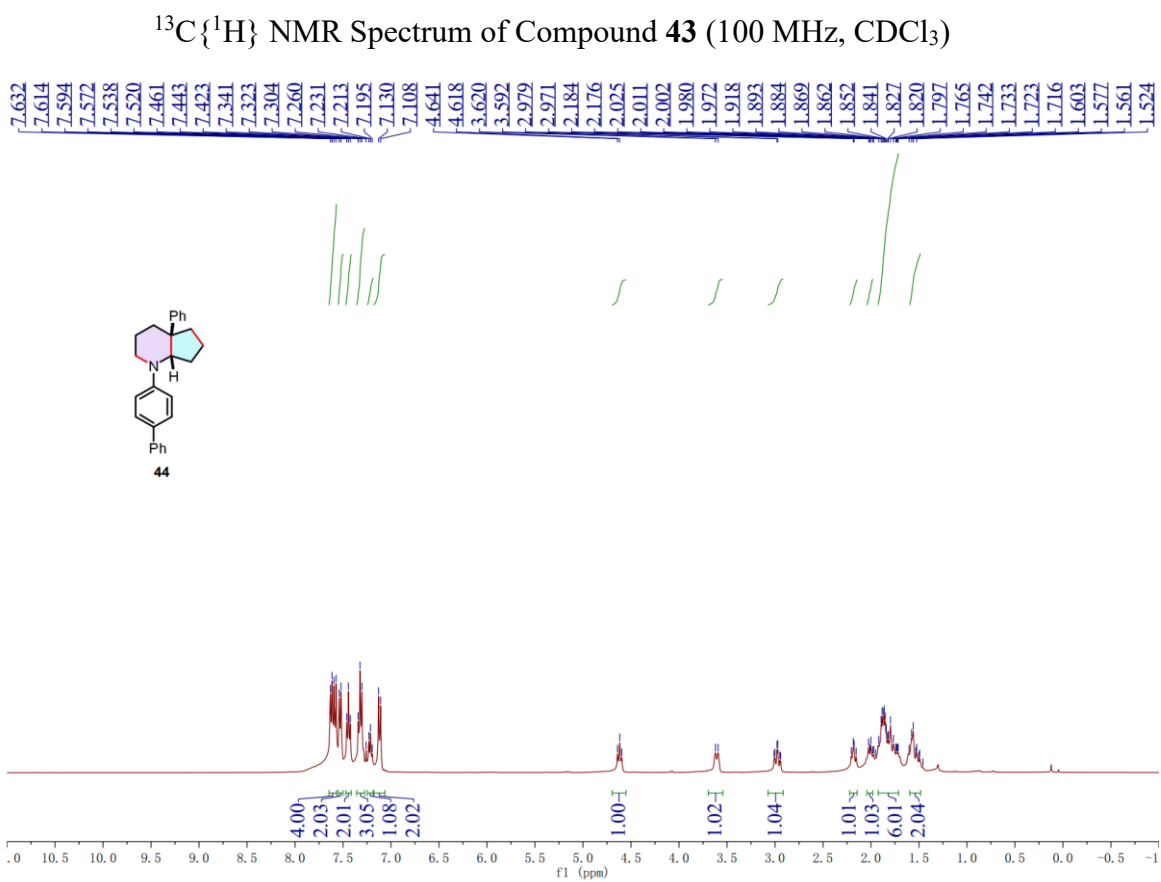

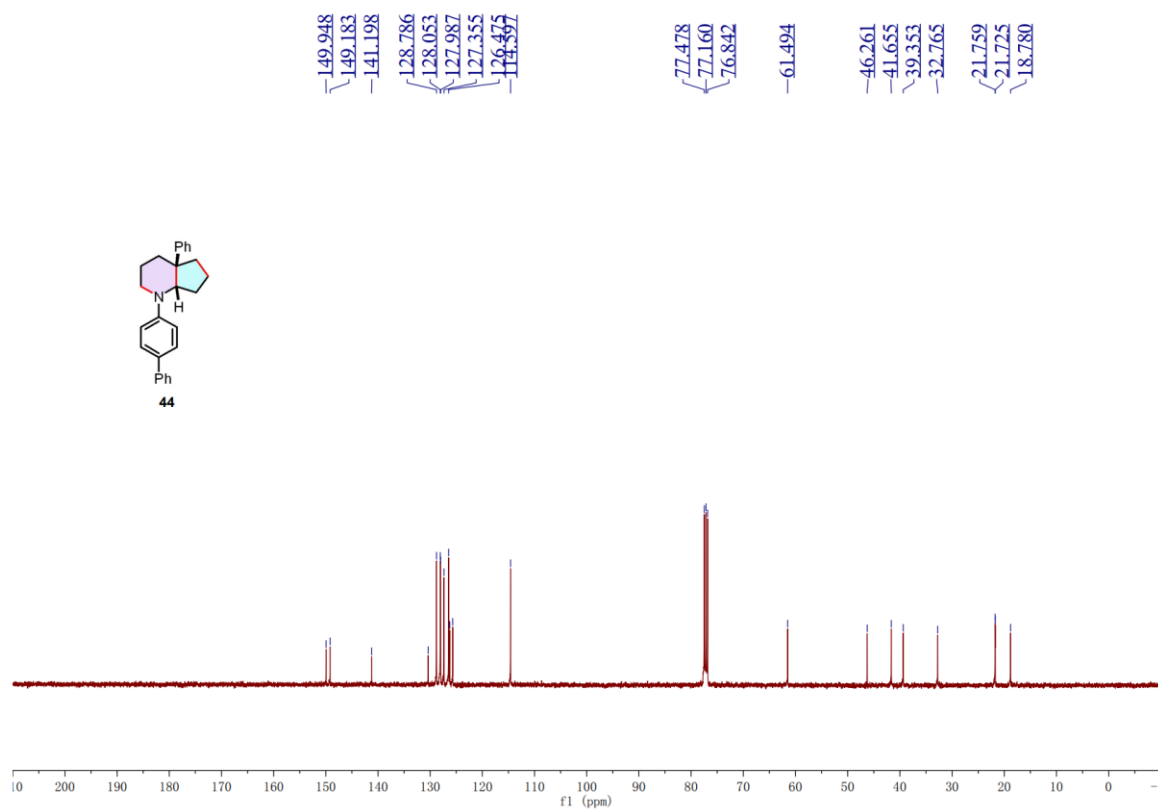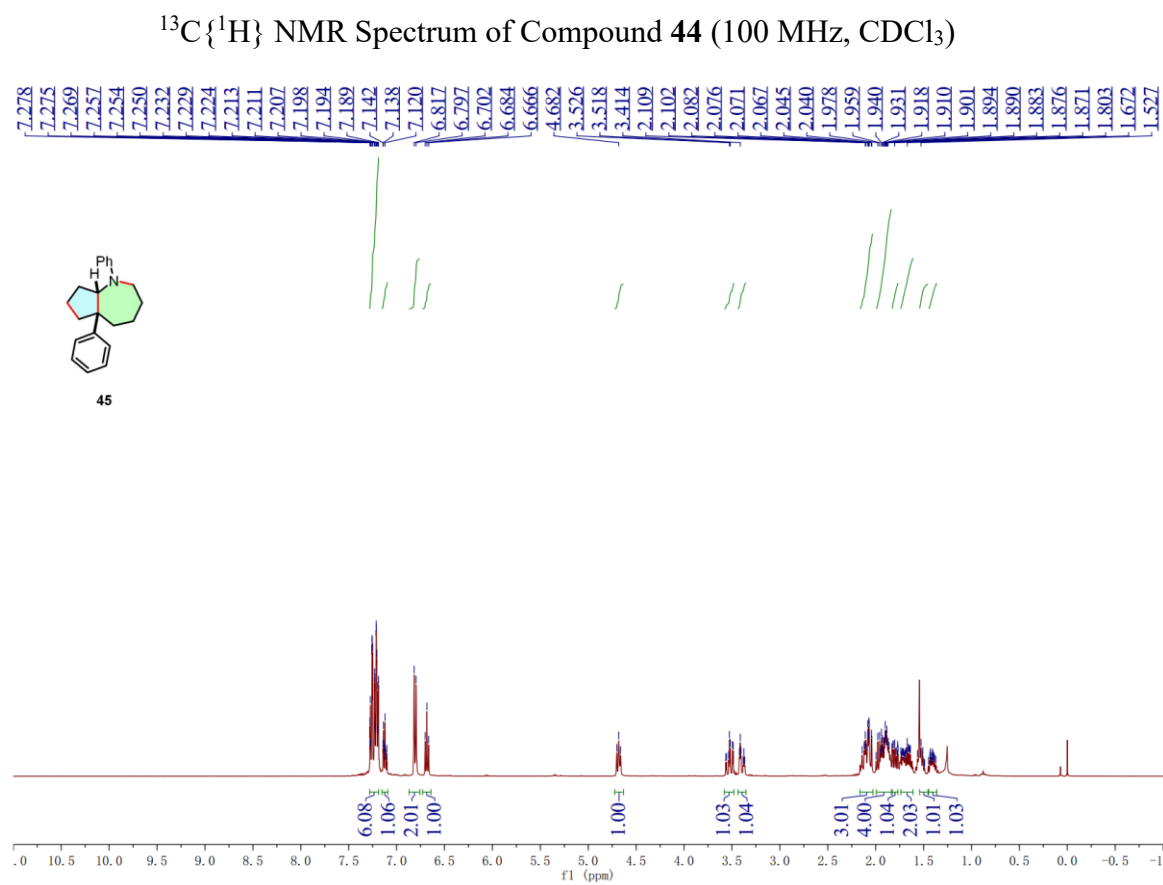

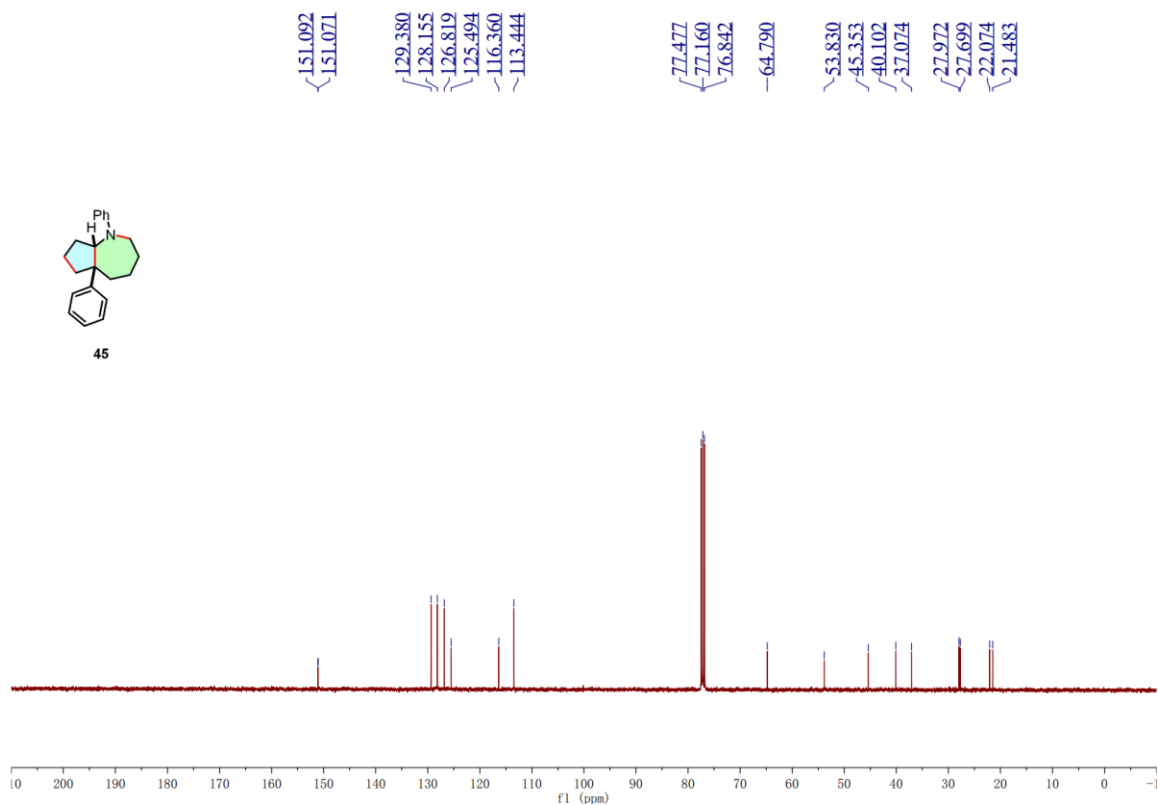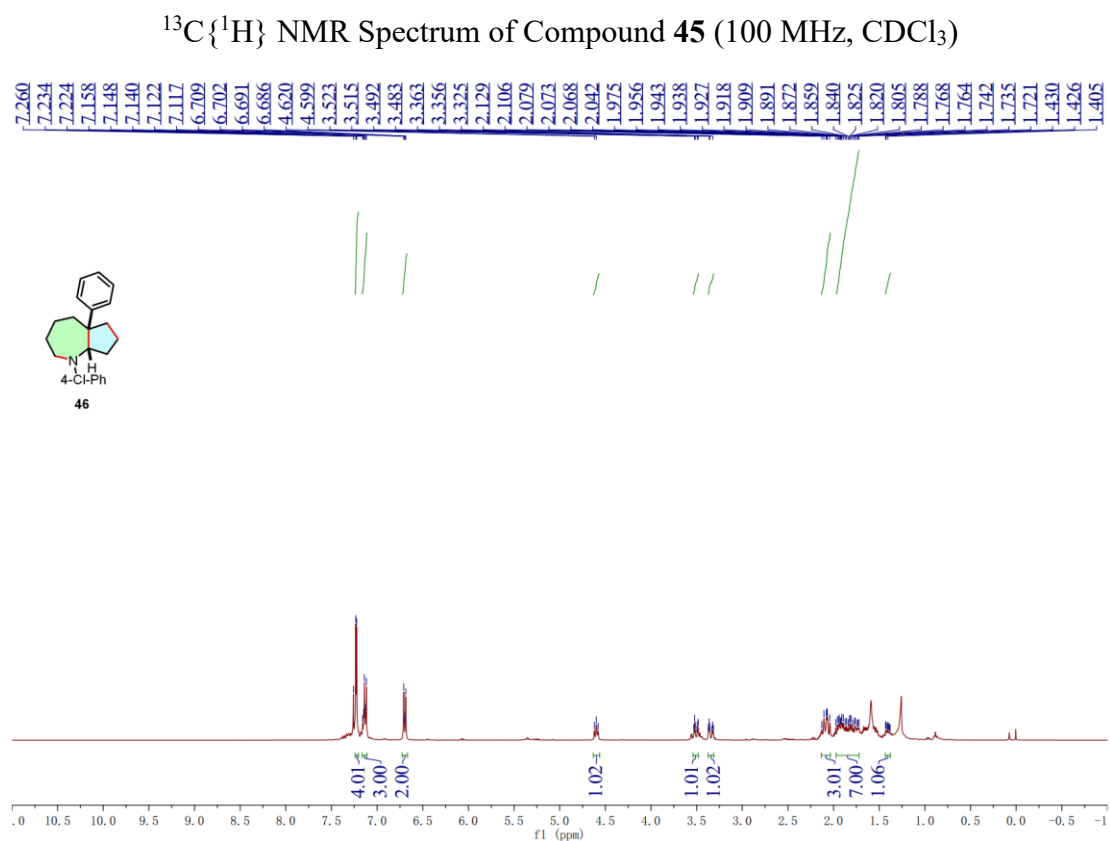

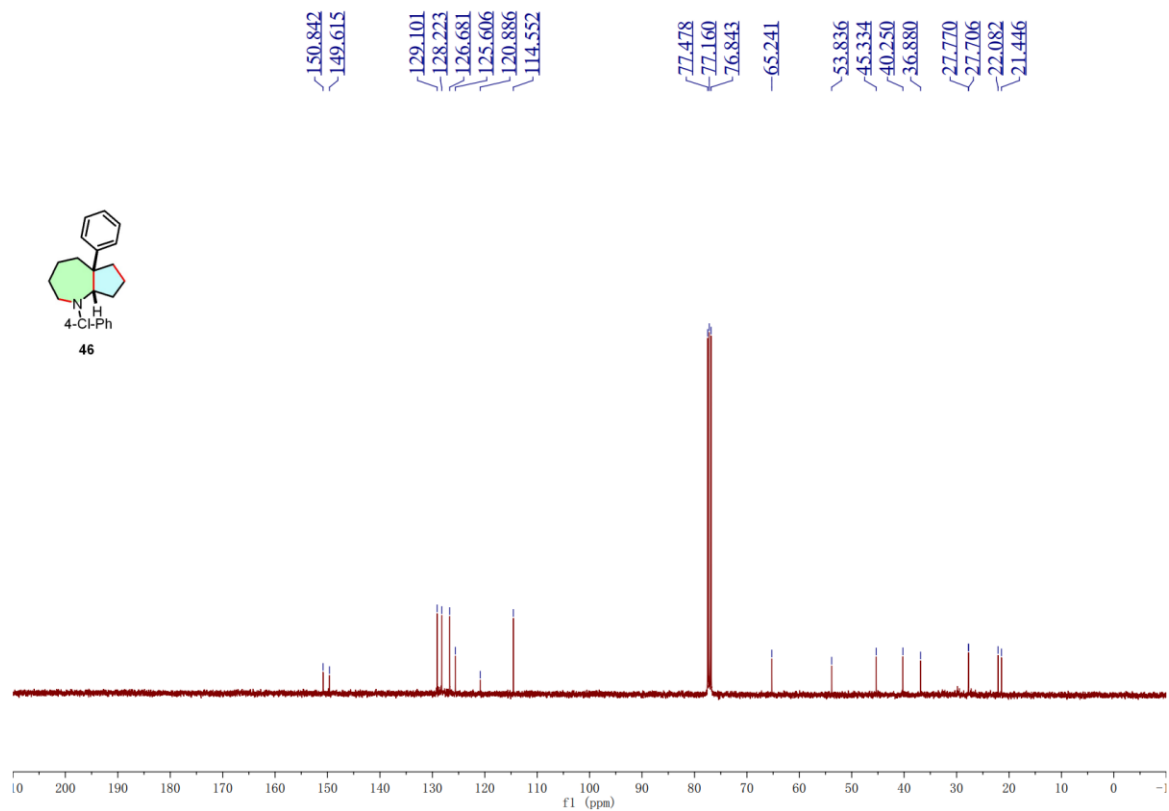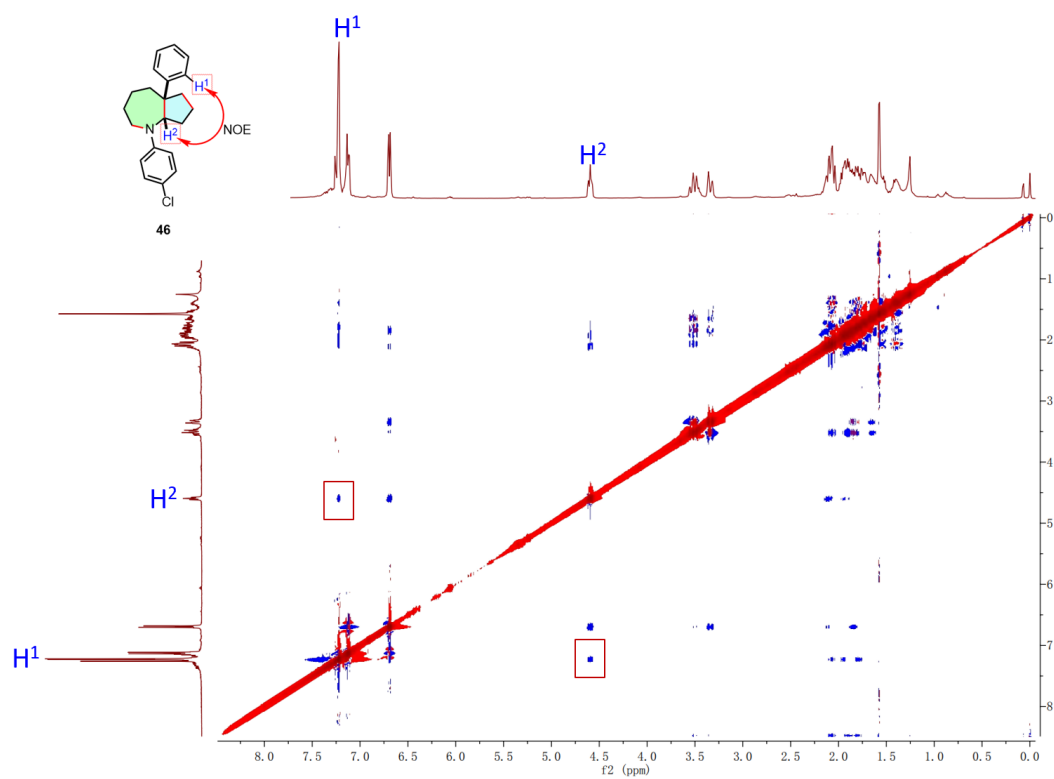

NOE NMR Spectrum of Compound **46** (100 MHz,  $\text{CDCl}_3$ )

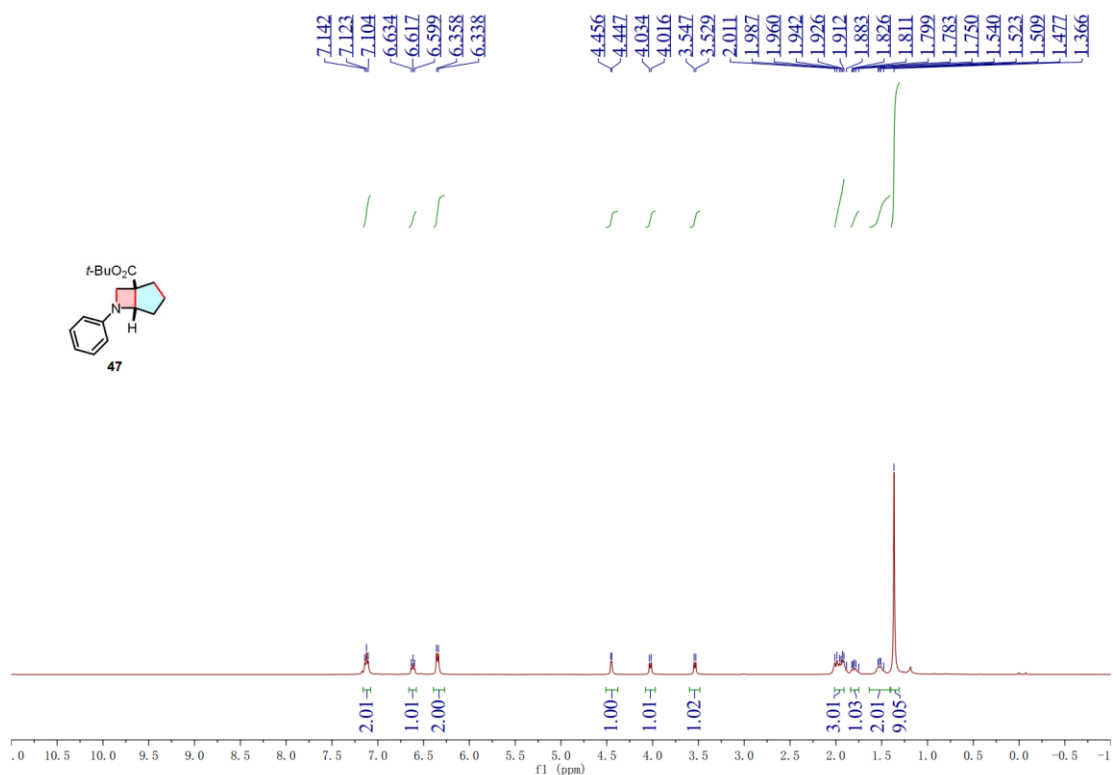

**<sup>1</sup>H NMR Spectrum of Compound **47** (400 MHz, CDCl<sub>3</sub>)**

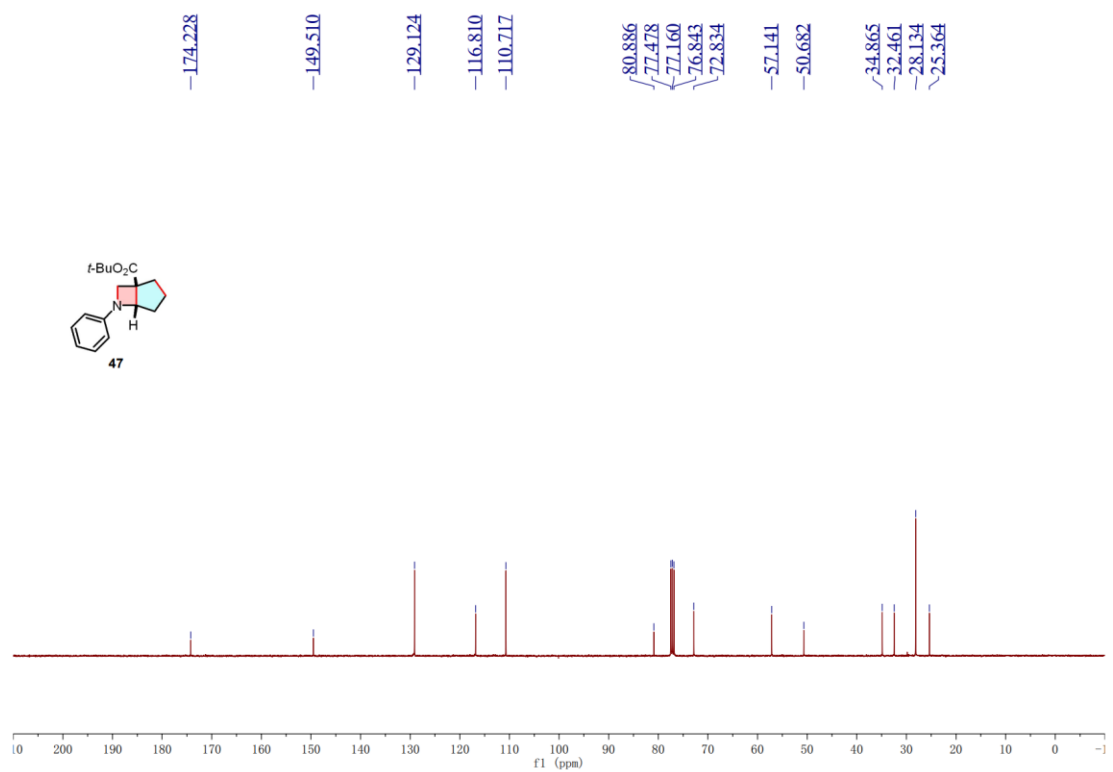

**<sup>13</sup>C{<sup>1</sup>H} NMR Spectrum of Compound **47** (100 MHz, CDCl<sub>3</sub>)**



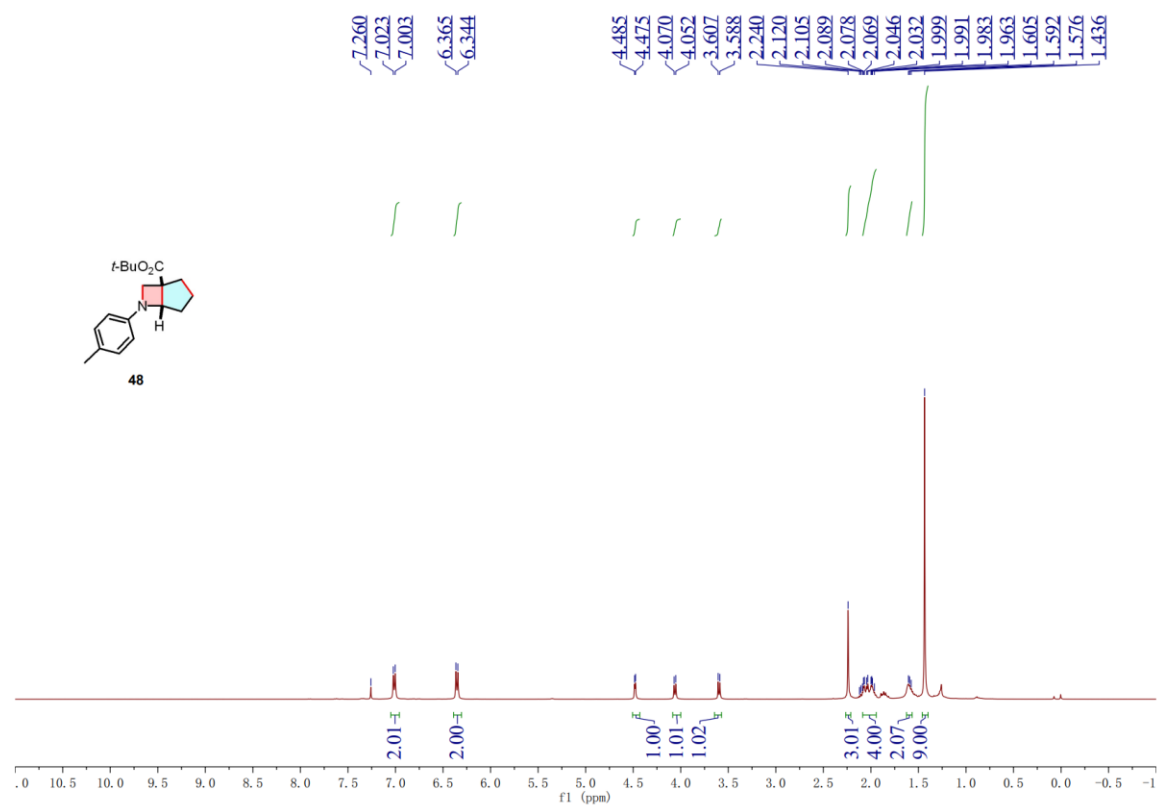

<sup>1</sup>H NMR Spectrum of Compound **48** (400 MHz, CDCl<sub>3</sub>)

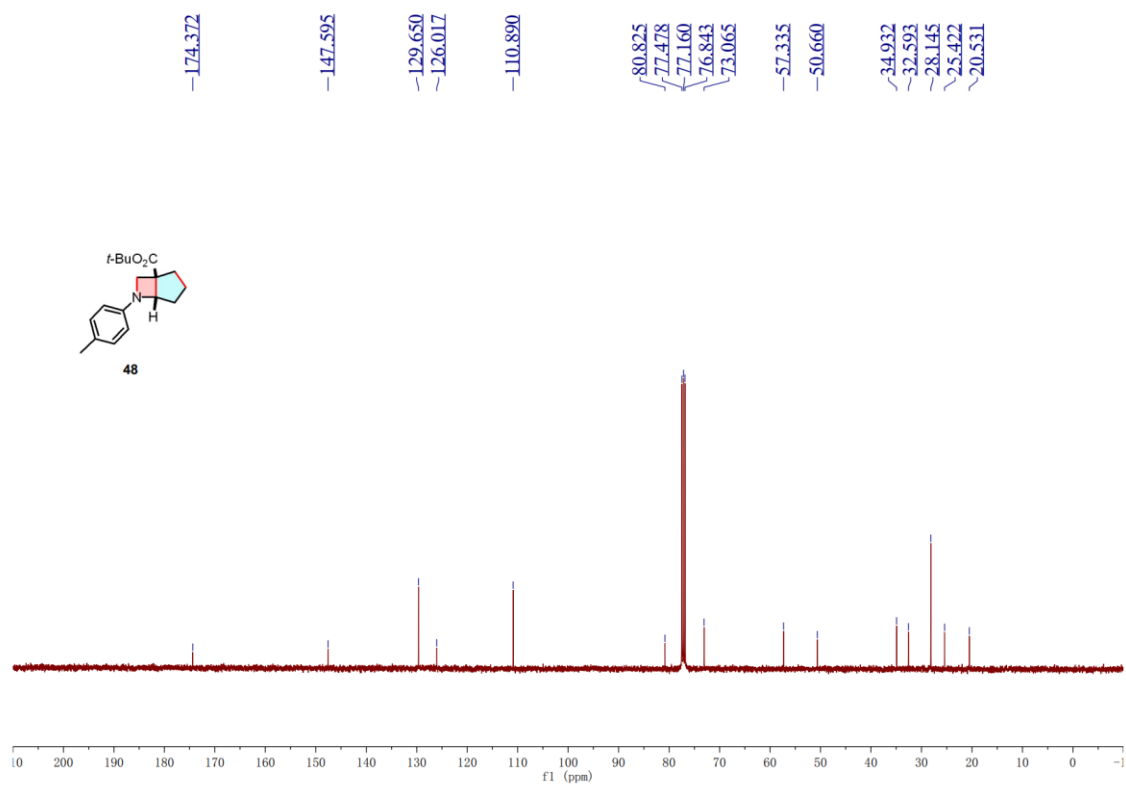

<sup>13</sup>C{<sup>1</sup>H} NMR Spectrum of Compound **48** (100 MHz, CDCl<sub>3</sub>)

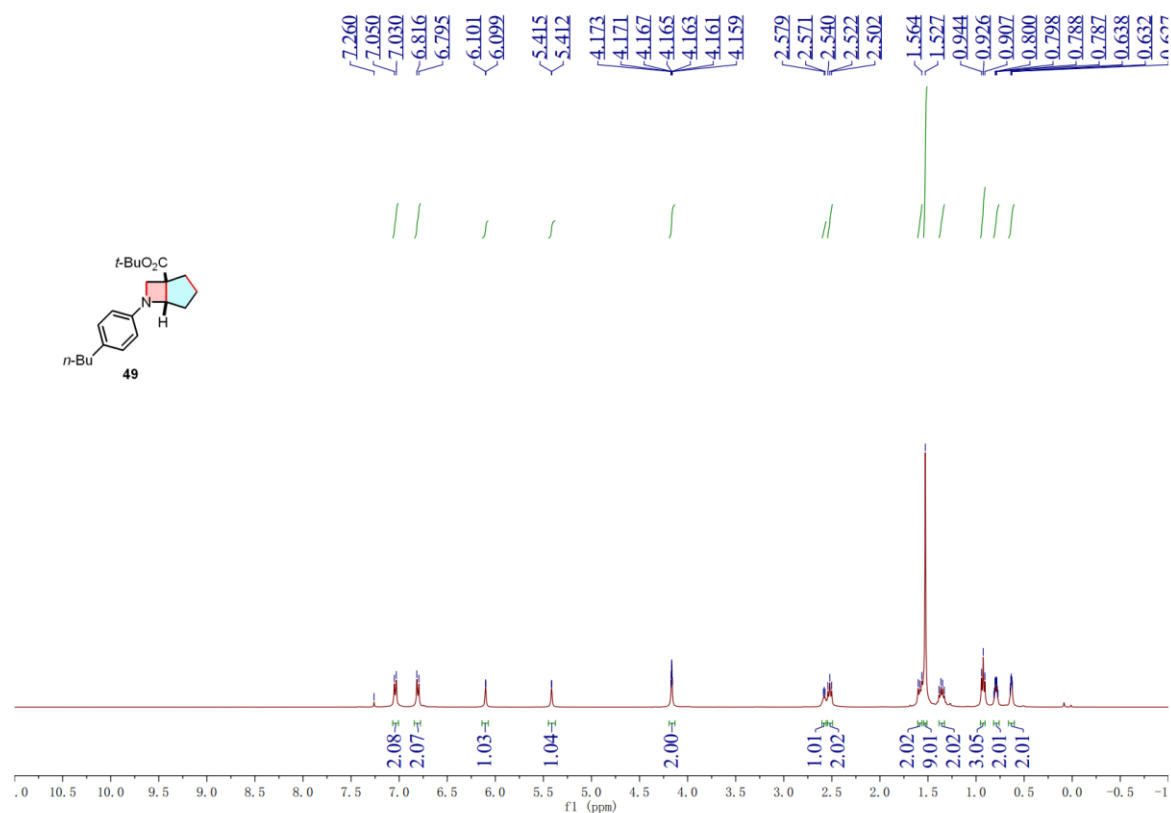

<sup>1</sup>H NMR Spectrum of Compound **49** (400 MHz, CDCl<sub>3</sub>)

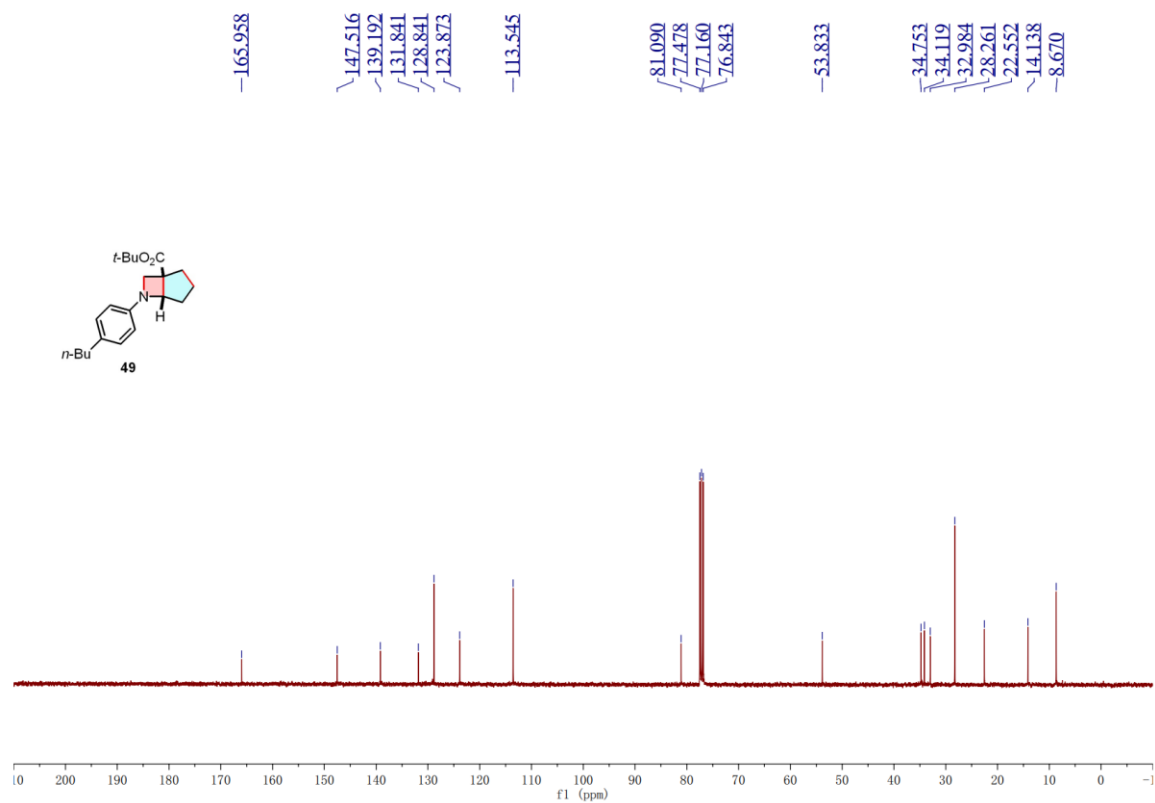

<sup>13</sup>C {<sup>1</sup>H} NMR Spectrum of Compound **49** (100 MHz, CDCl<sub>3</sub>)

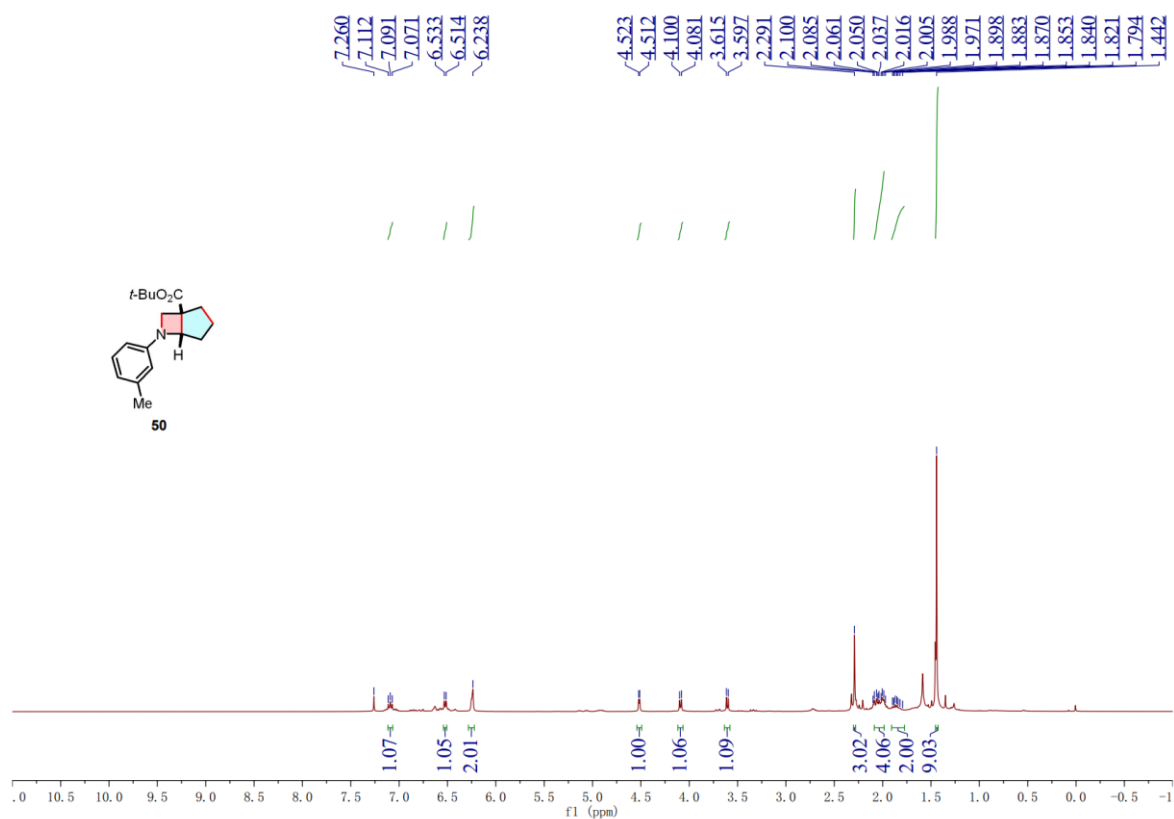

<sup>1</sup>H NMR Spectrum of Compound **50** (400 MHz, CDCl<sub>3</sub>)

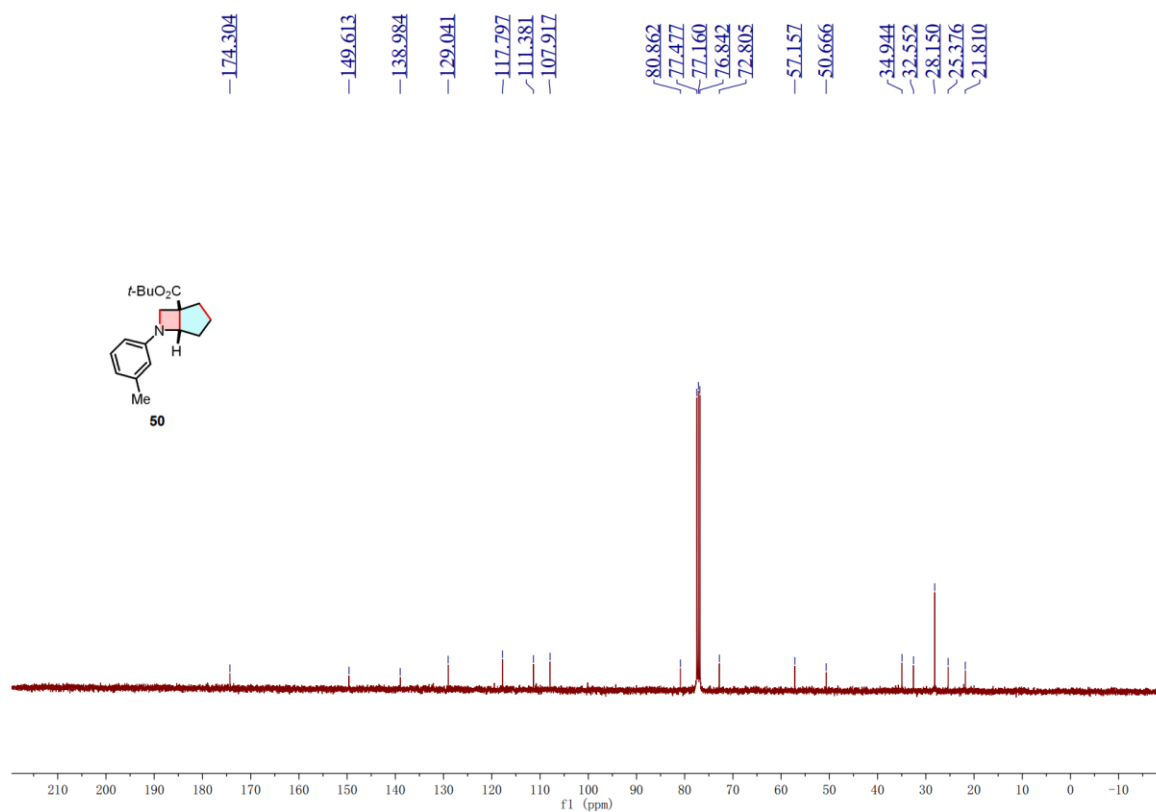

<sup>13</sup>C{<sup>1</sup>H} NMR Spectrum of Compound **50** (100 MHz, CDCl<sub>3</sub>)

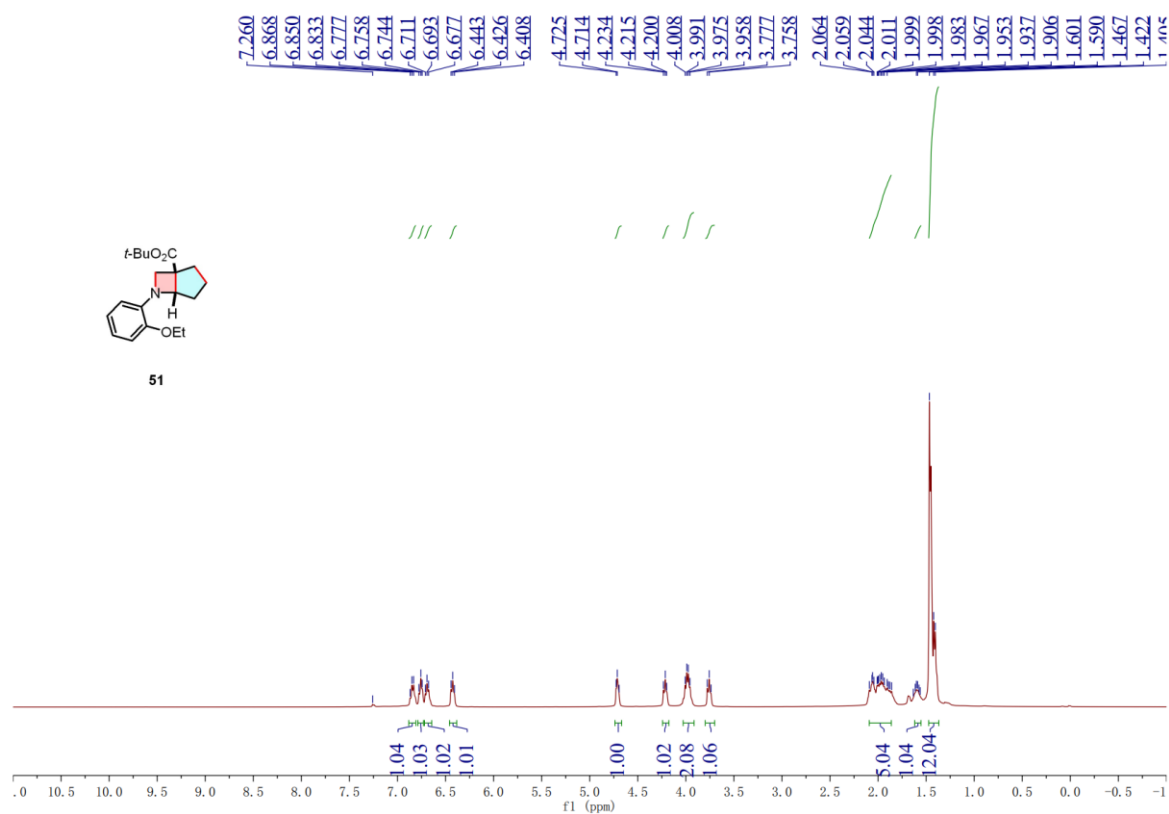

**<sup>1</sup>H NMR Spectrum of Compound **51** (400 MHz, CDCl<sub>3</sub>)**

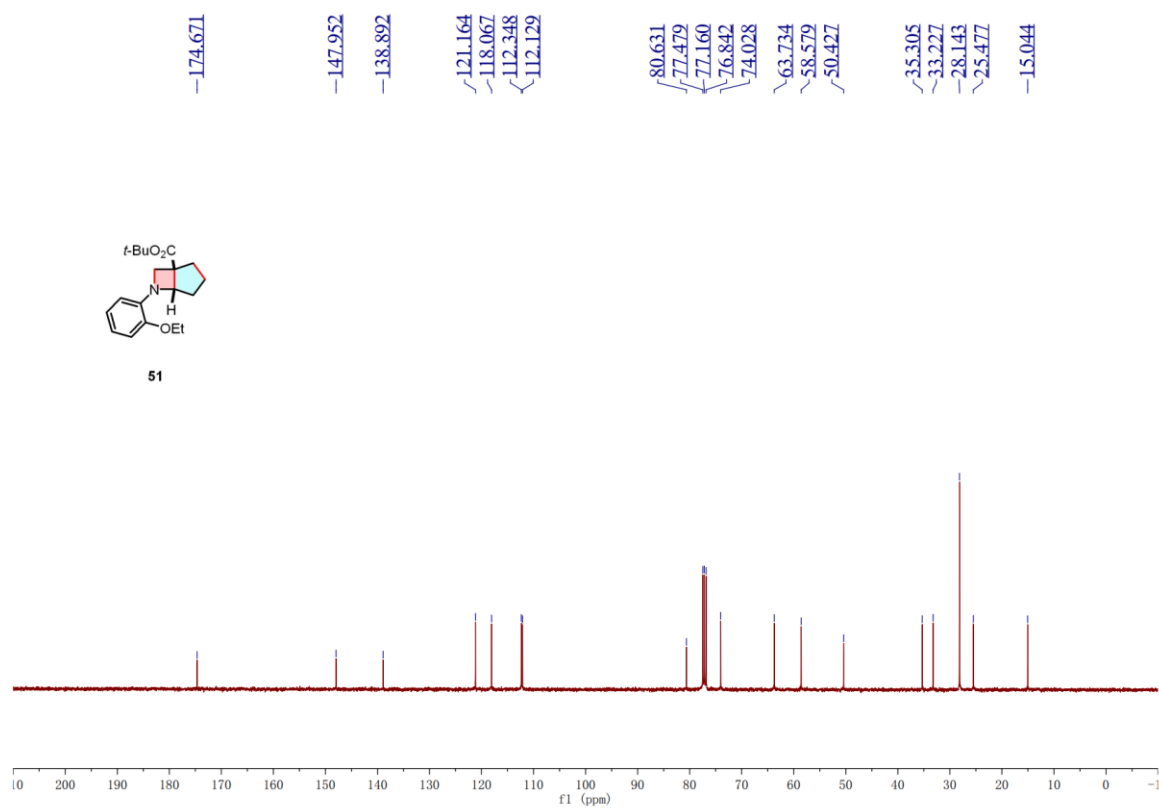

**<sup>13</sup>C{<sup>1</sup>H} NMR Spectrum of Compound **51** (100 MHz, CDCl<sub>3</sub>)**

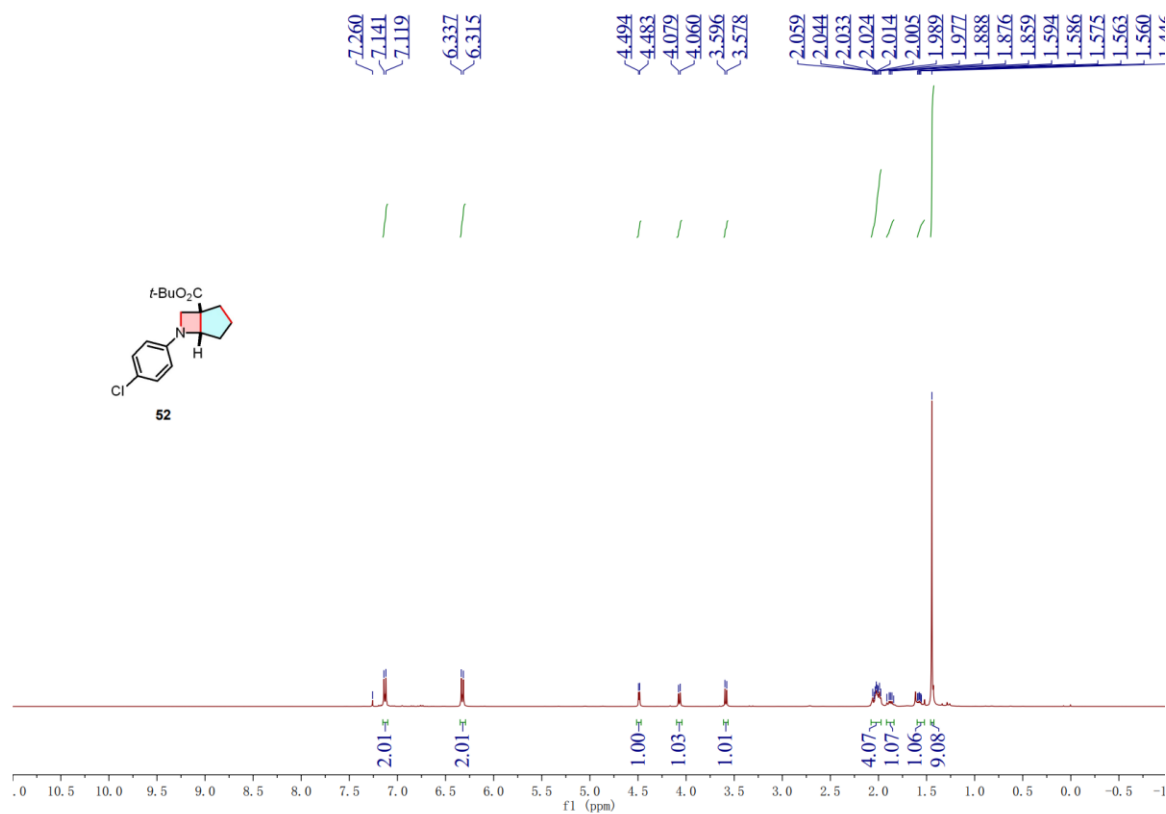

**<sup>1</sup>H NMR Spectrum of Compound **52** (400 MHz, CDCl<sub>3</sub>)**

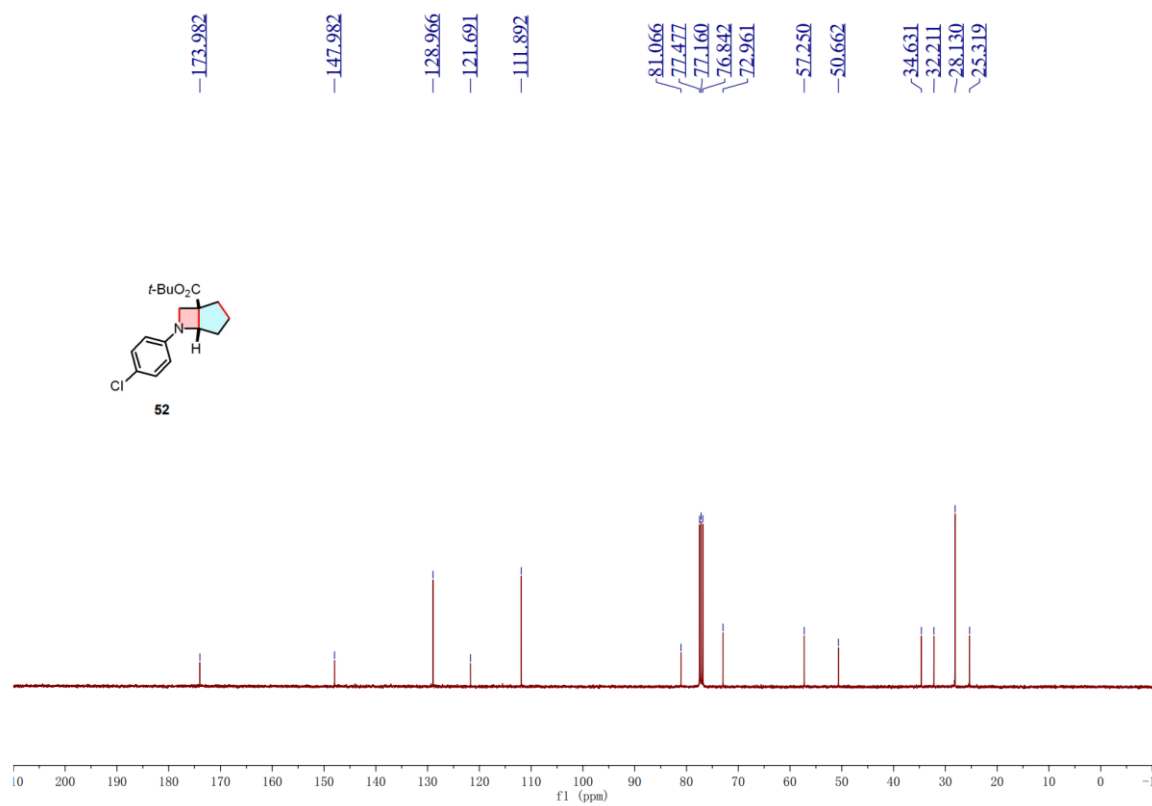

**<sup>13</sup>C{<sup>1</sup>H} NMR Spectrum of Compound **52** (100 MHz, CDCl<sub>3</sub>)**

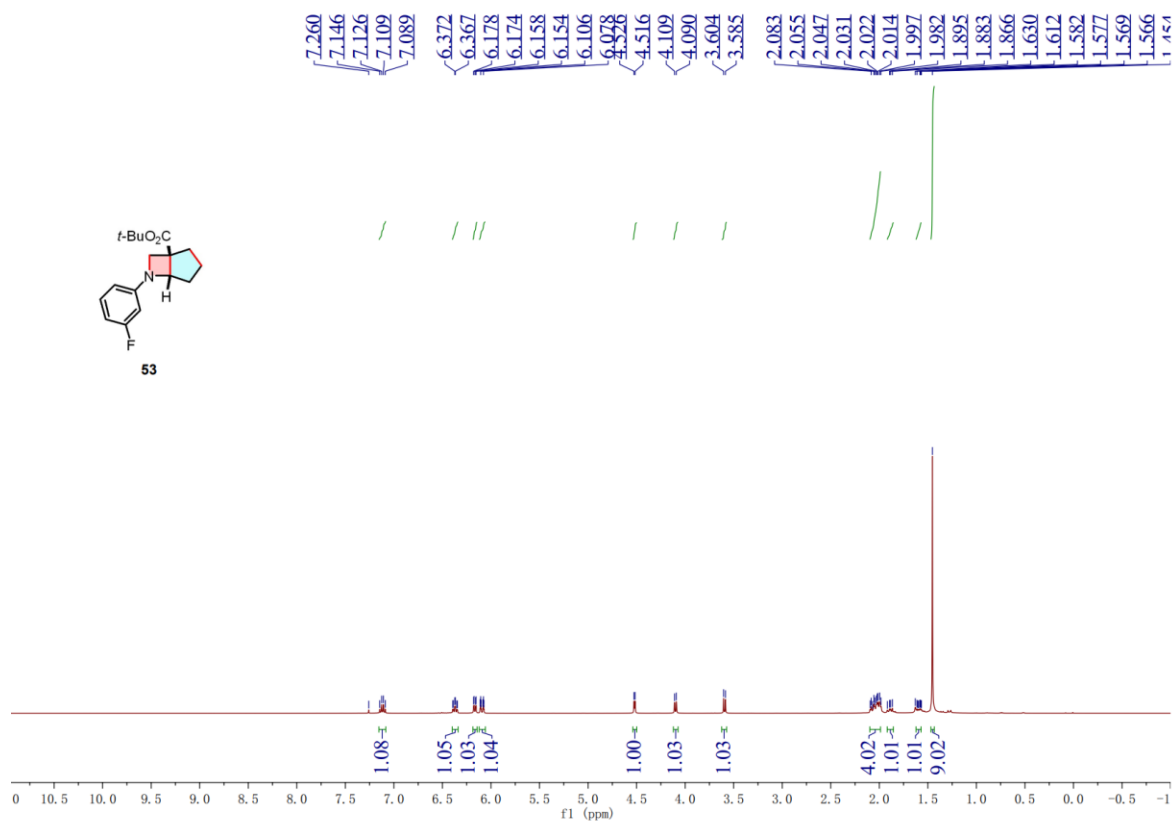

**<sup>1</sup>H NMR Spectrum of Compound **53** (400 MHz, CDCl<sub>3</sub>)**

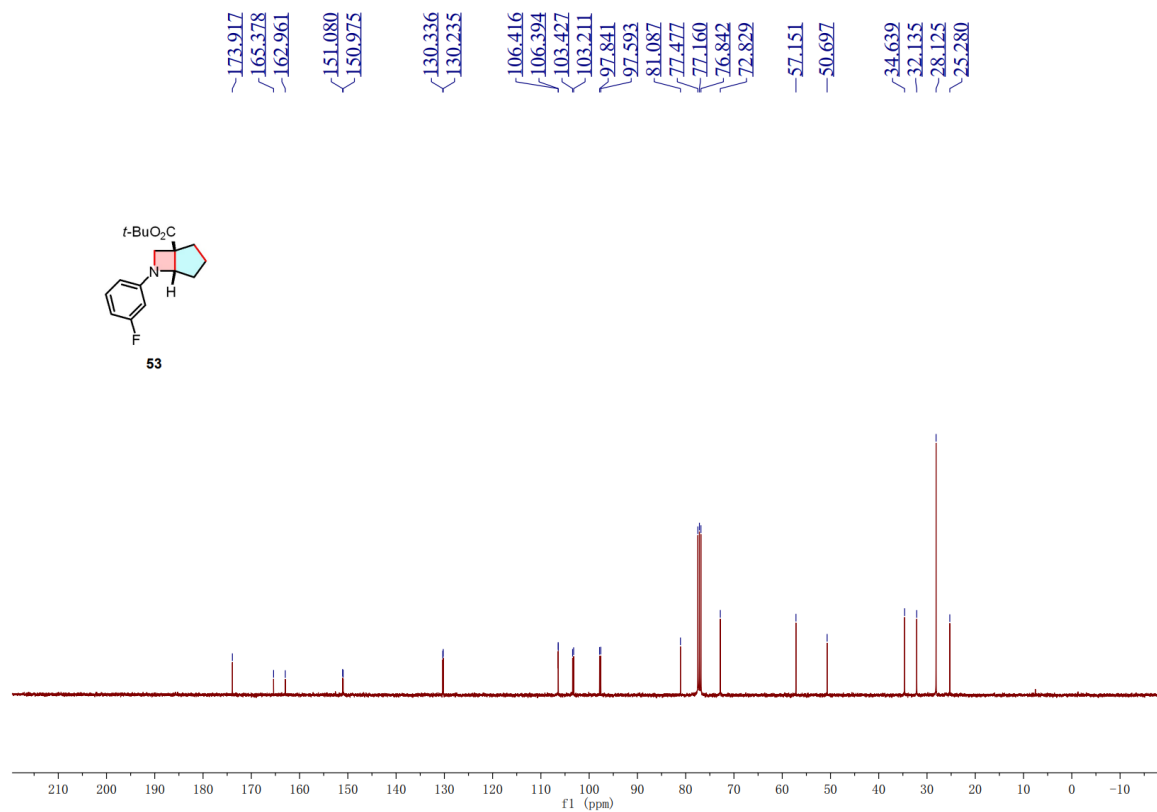

**<sup>13</sup>C {<sup>1</sup>H} NMR Spectrum of Compound **53** (100 MHz, CDCl<sub>3</sub>)**

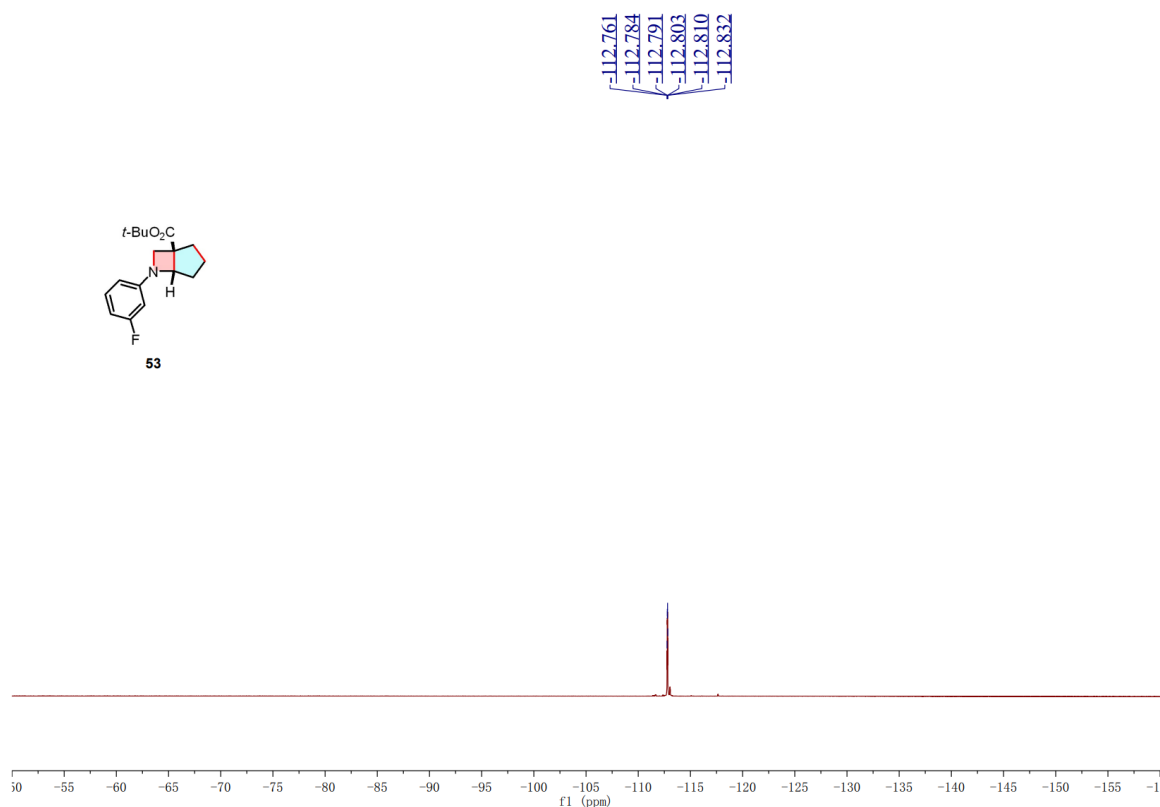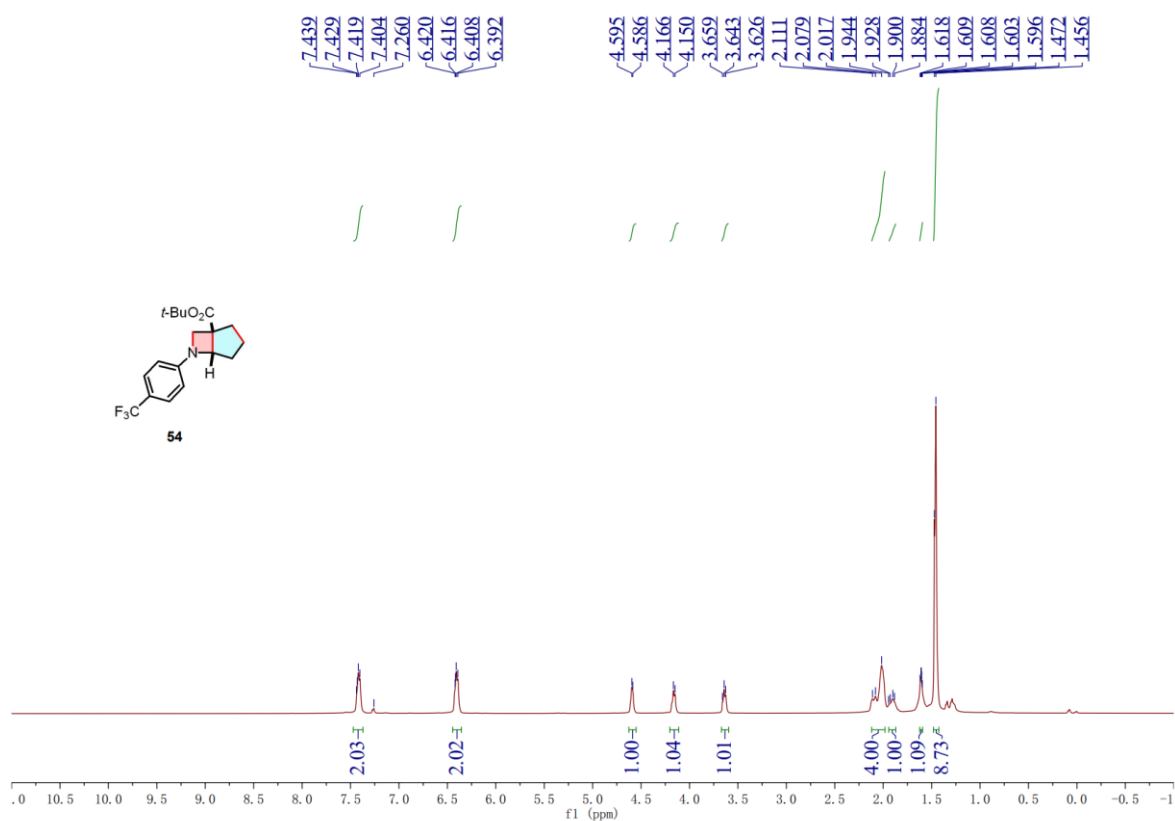

<sup>1</sup>H NMR Spectrum of Compound **54** (400 MHz, CDCl<sub>3</sub>)

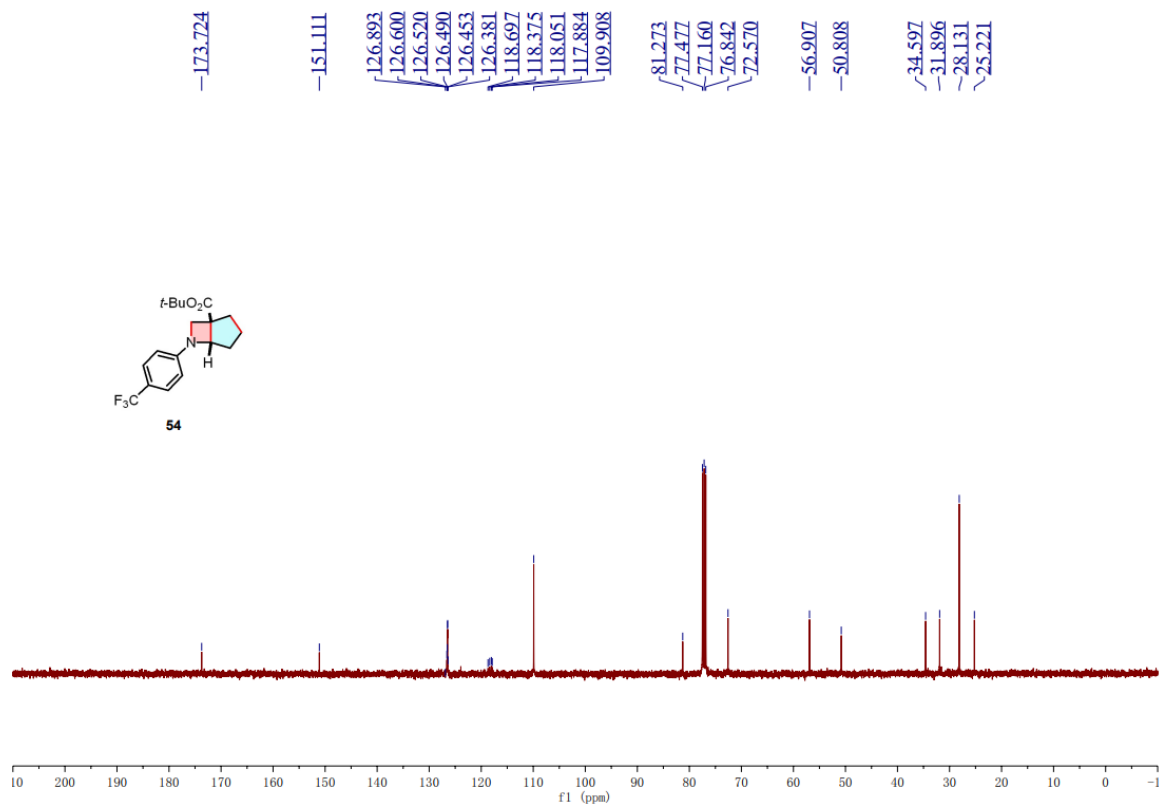

**<sup>13</sup>C{<sup>1</sup>H} NMR Spectrum of Compound **54** (100 MHz, CDCl<sub>3</sub>)**

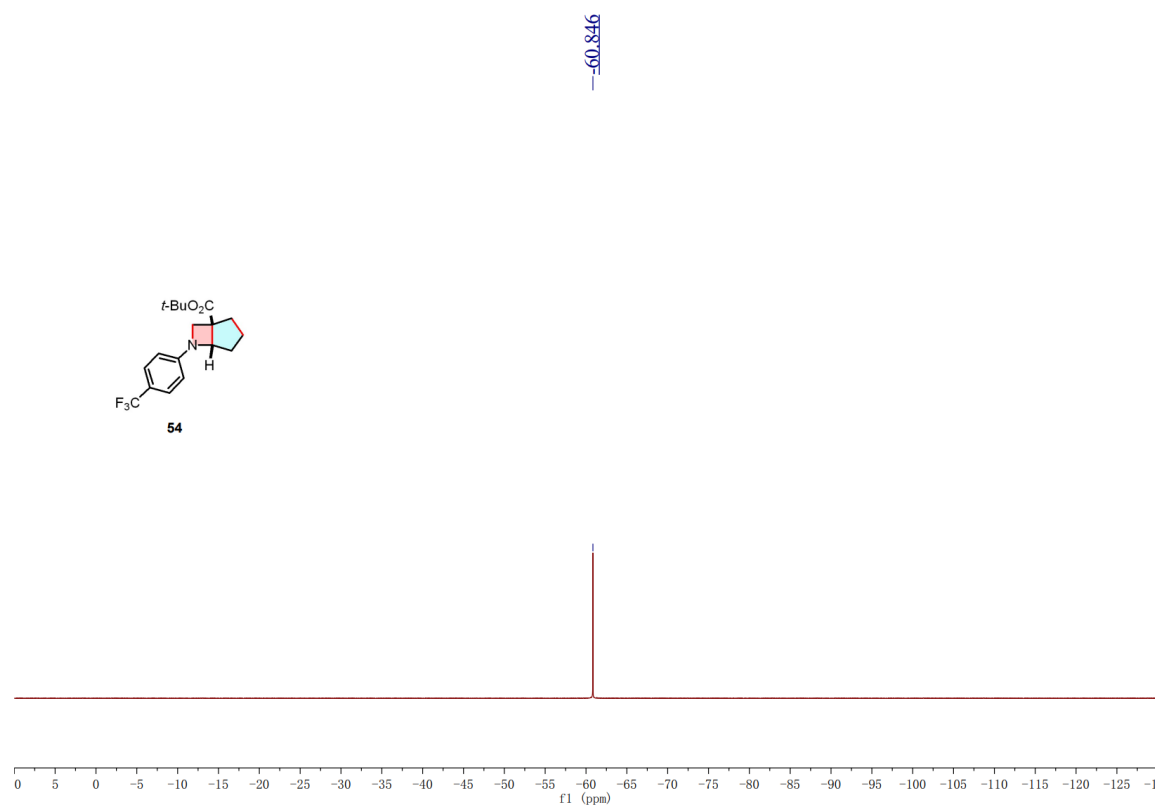

**<sup>19</sup>F{<sup>1</sup>H} NMR Spectrum of Compound **54** (376 MHz, CDCl<sub>3</sub>)**



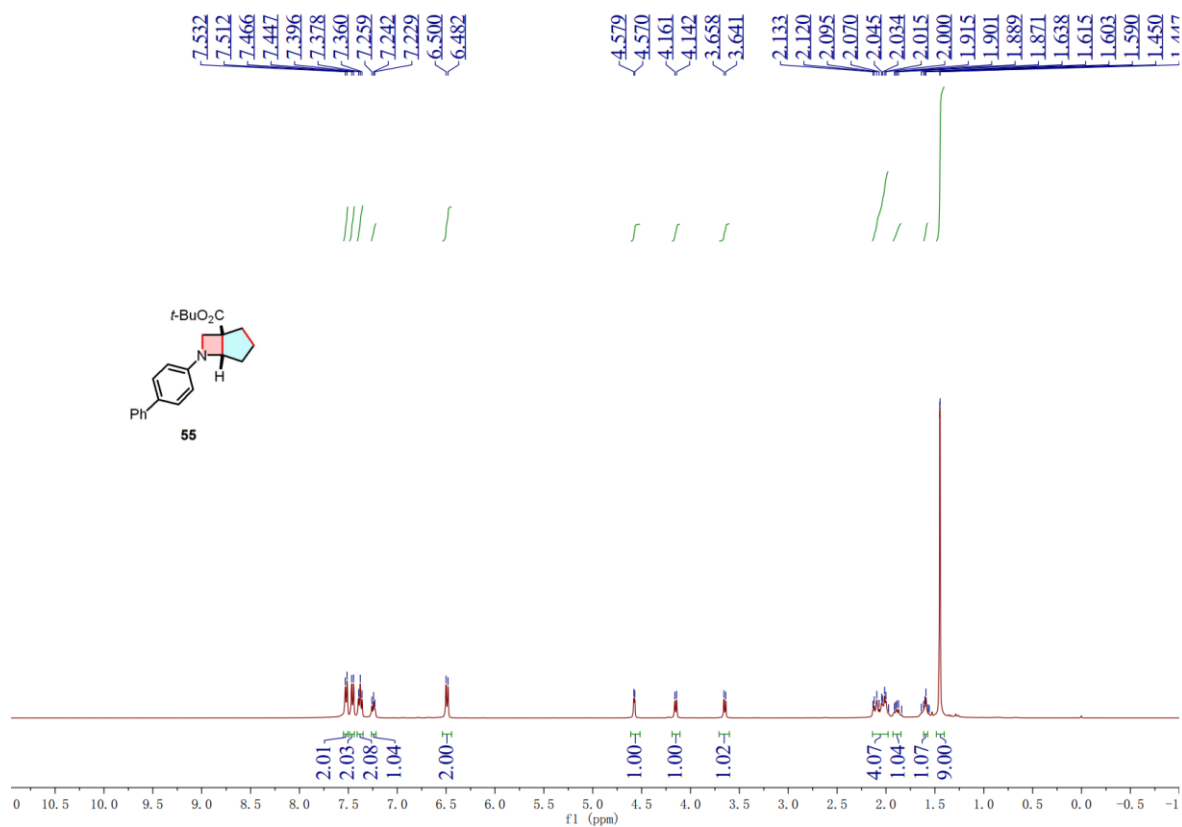

**<sup>1</sup>H NMR Spectrum of Compound **55** (400 MHz, CDCl<sub>3</sub>)**

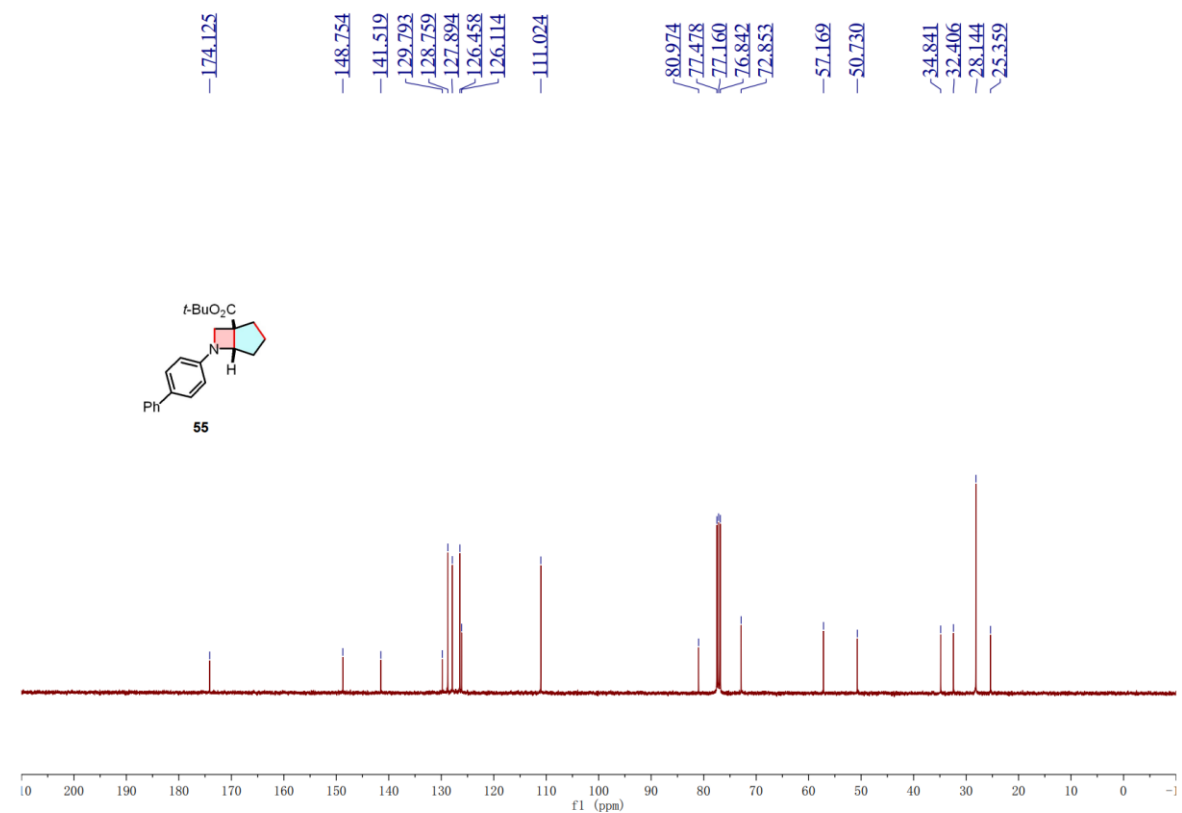

**<sup>13</sup>C {<sup>1</sup>H} NMR Spectrum of Compound **55** (100 MHz, CDCl<sub>3</sub>)**

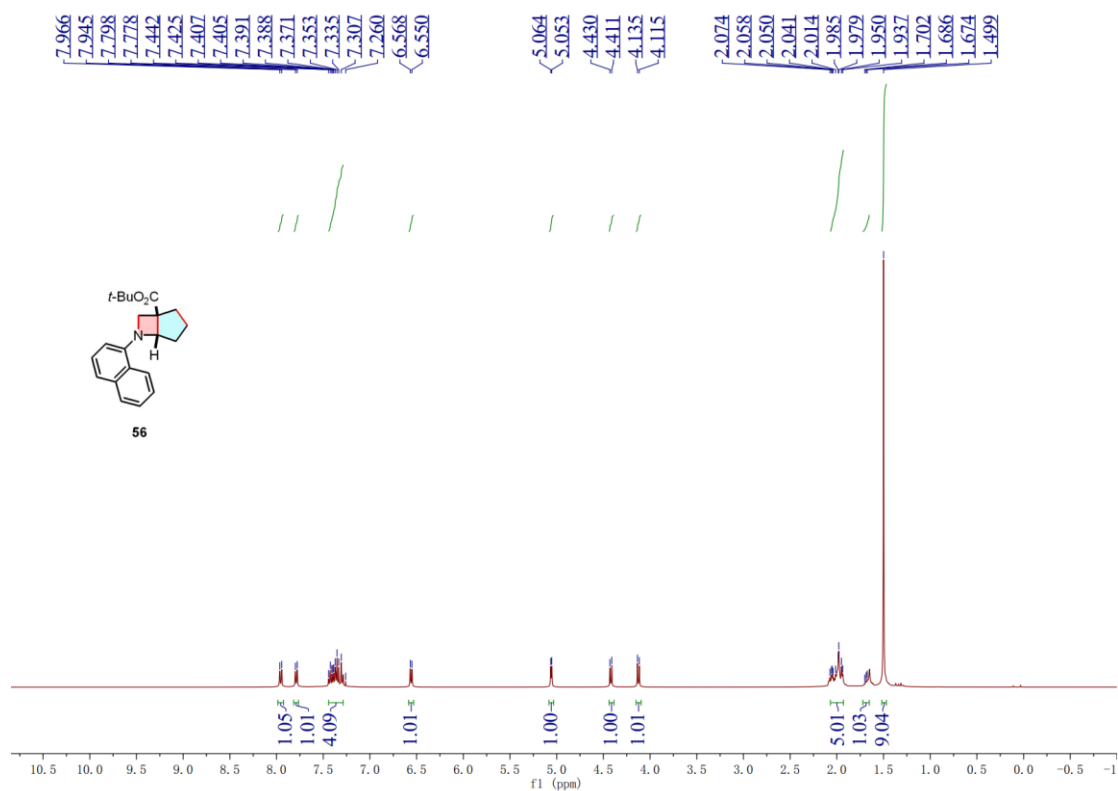

**<sup>1</sup>H NMR Spectrum of Compound **56** (400 MHz, CDCl<sub>3</sub>)**

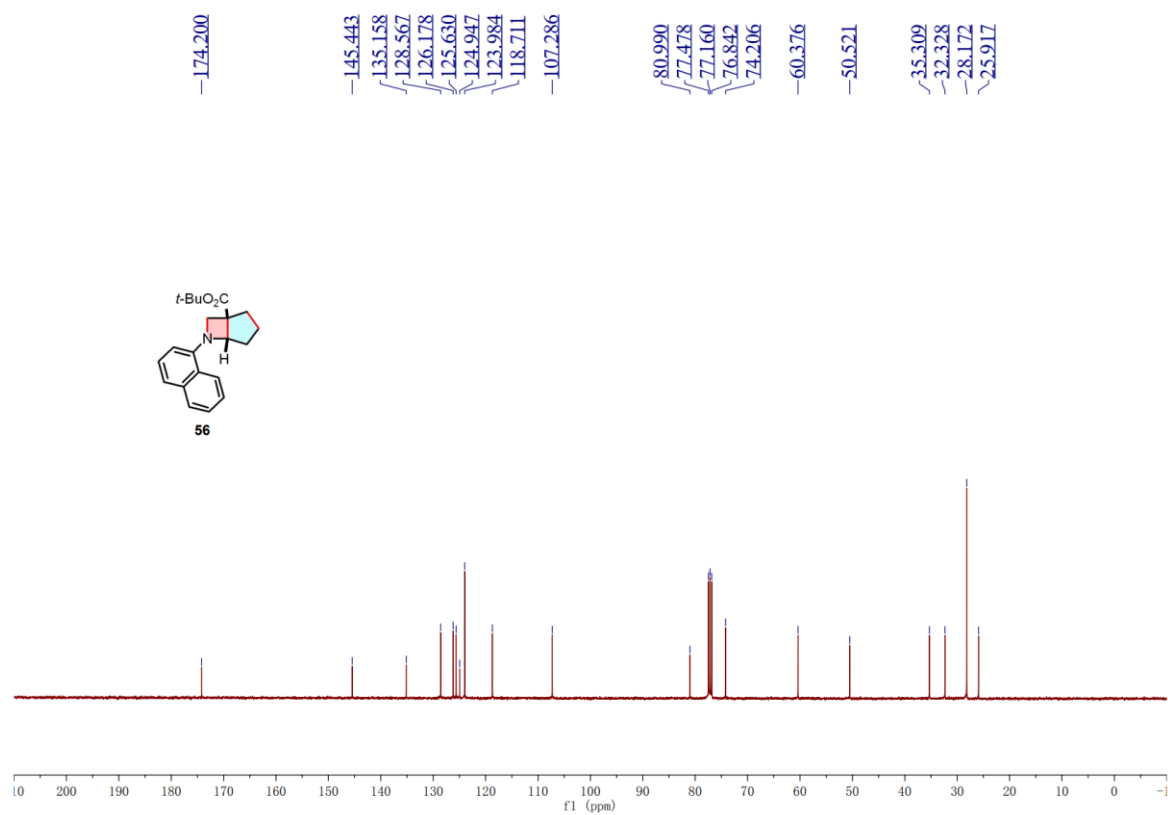

**<sup>13</sup>C{<sup>1</sup>H} NMR Spectrum of Compound **56** (100 MHz, CDCl<sub>3</sub>)**

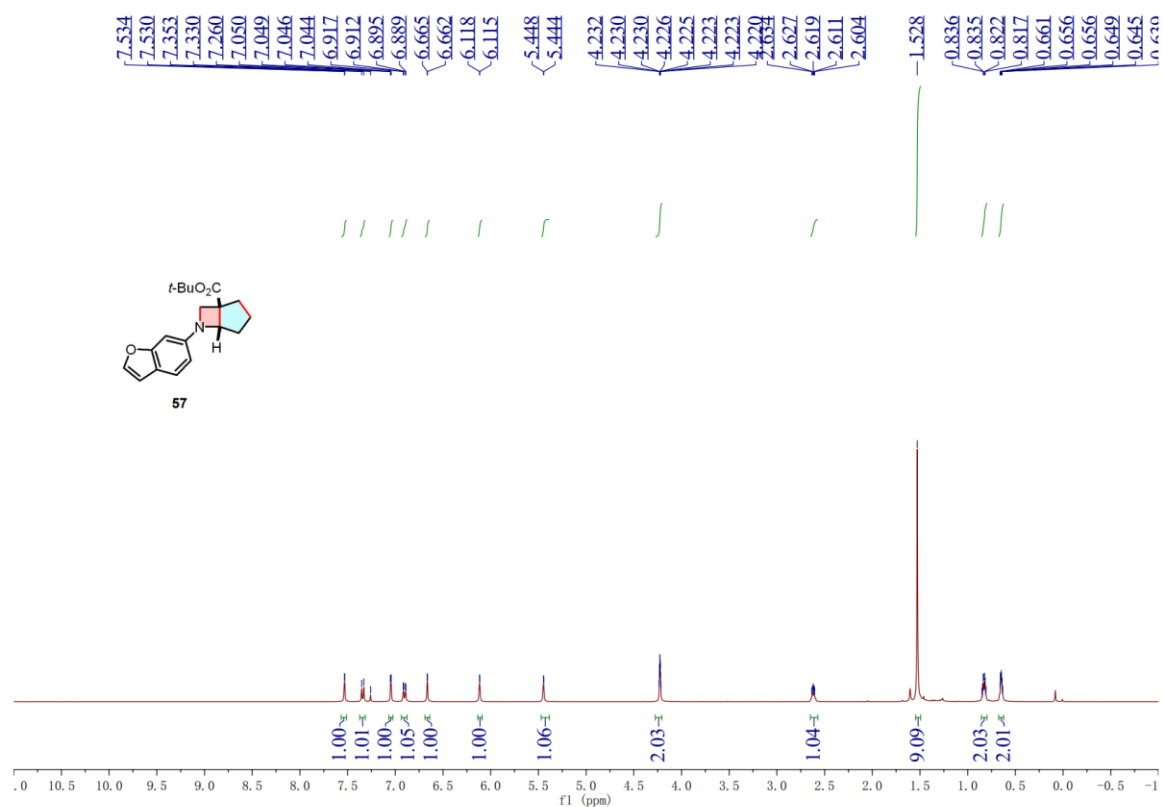

<sup>1</sup>H NMR Spectrum of Compound **57** (400 MHz, CDCl<sub>3</sub>)

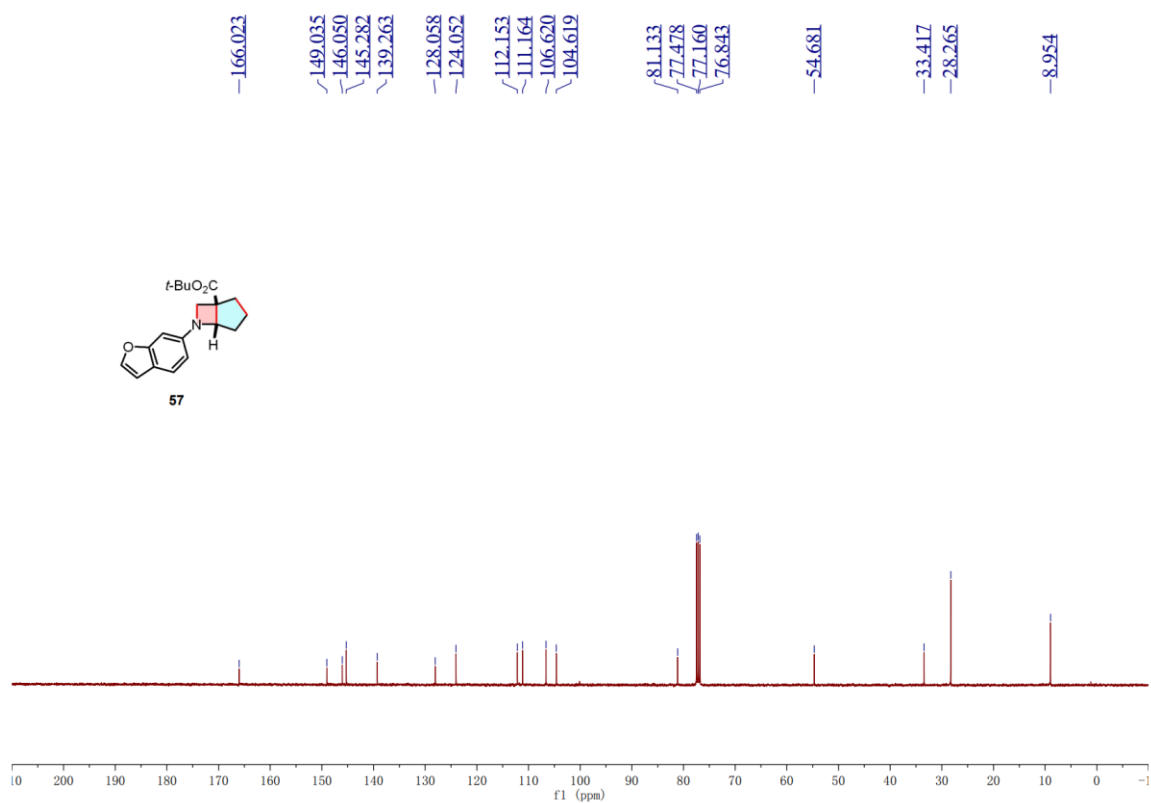

<sup>13</sup>C {<sup>1</sup>H} NMR Spectrum of Compound **57** (100 MHz, CDCl<sub>3</sub>)

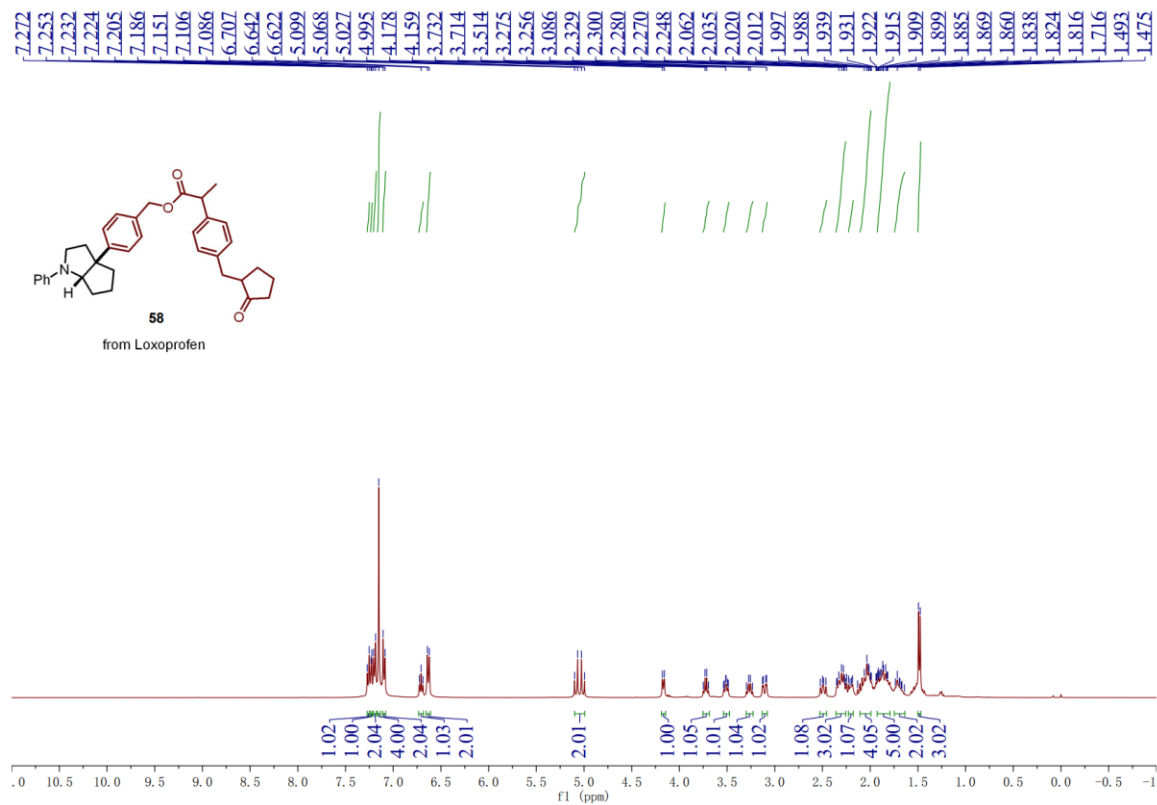

**<sup>1</sup>H NMR Spectrum of Compound **58** (400 MHz, CDCl<sub>3</sub>)**

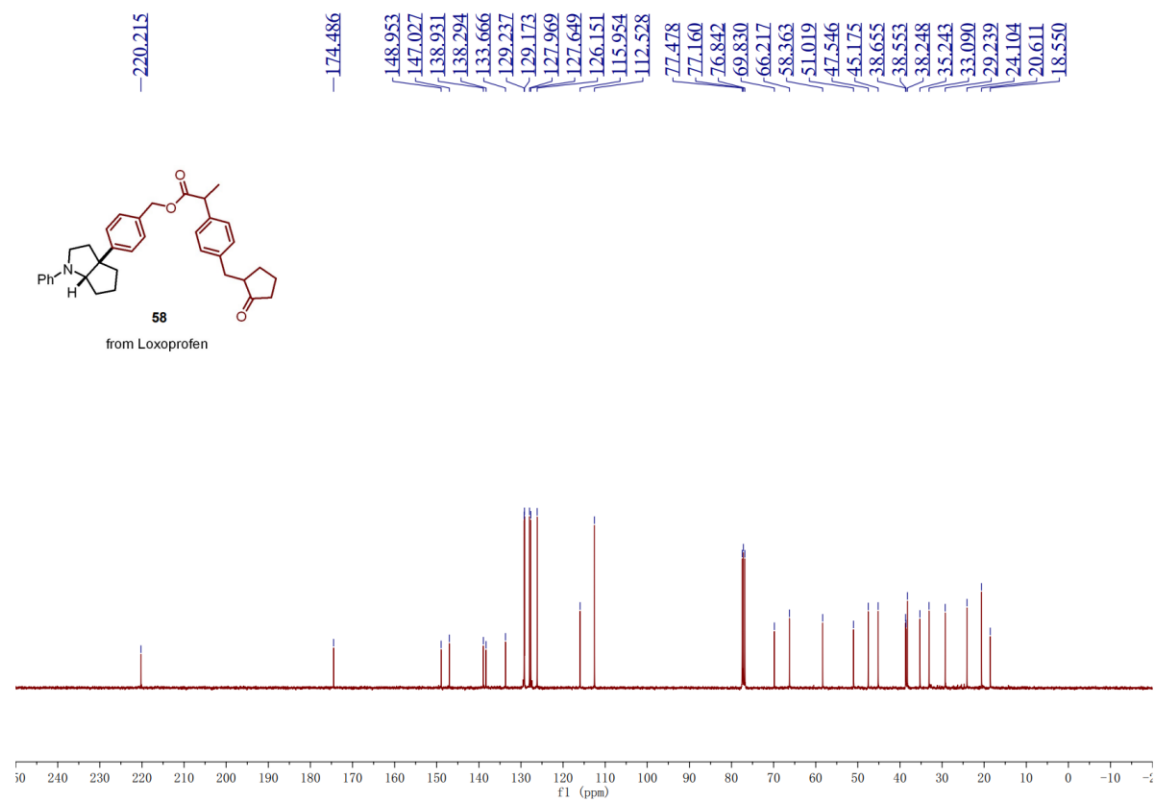

**<sup>13</sup>C {<sup>1</sup>H} NMR Spectrum of Compound **58** (100 MHz, CDCl<sub>3</sub>)**

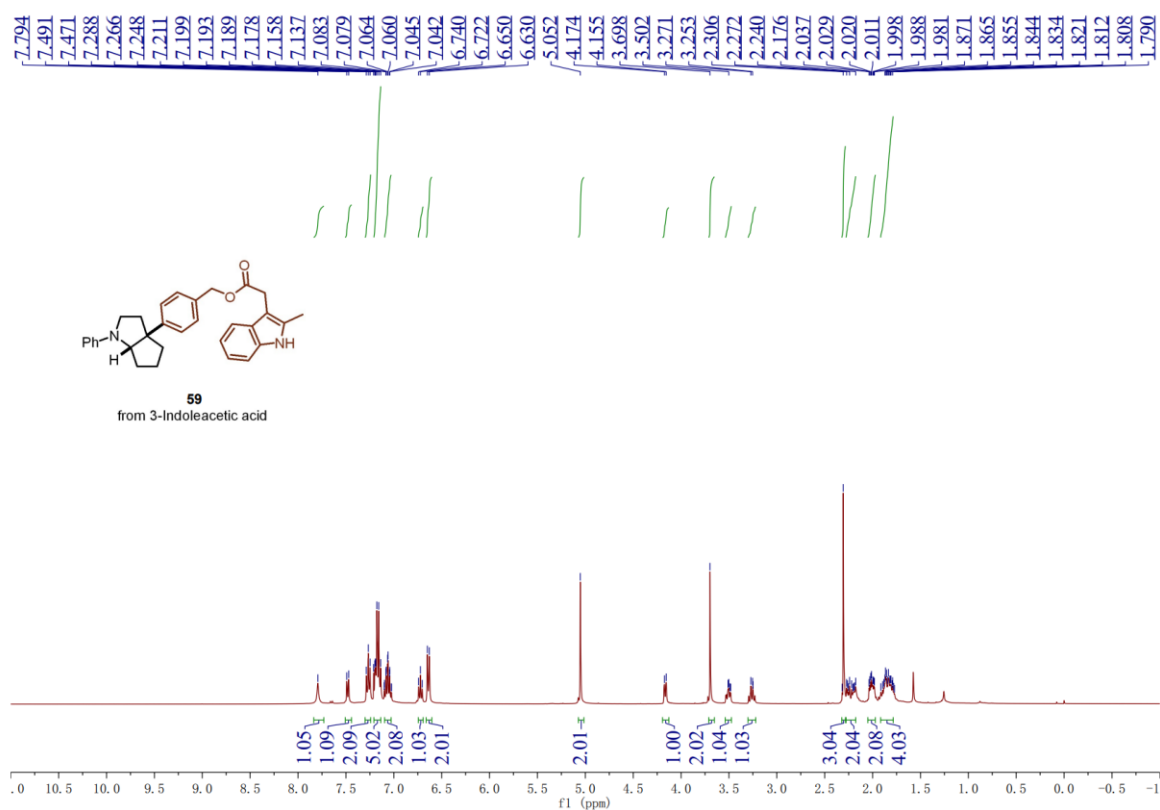

<sup>1</sup>H NMR Spectrum of Compound **59** (400 MHz, CDCl<sub>3</sub>)

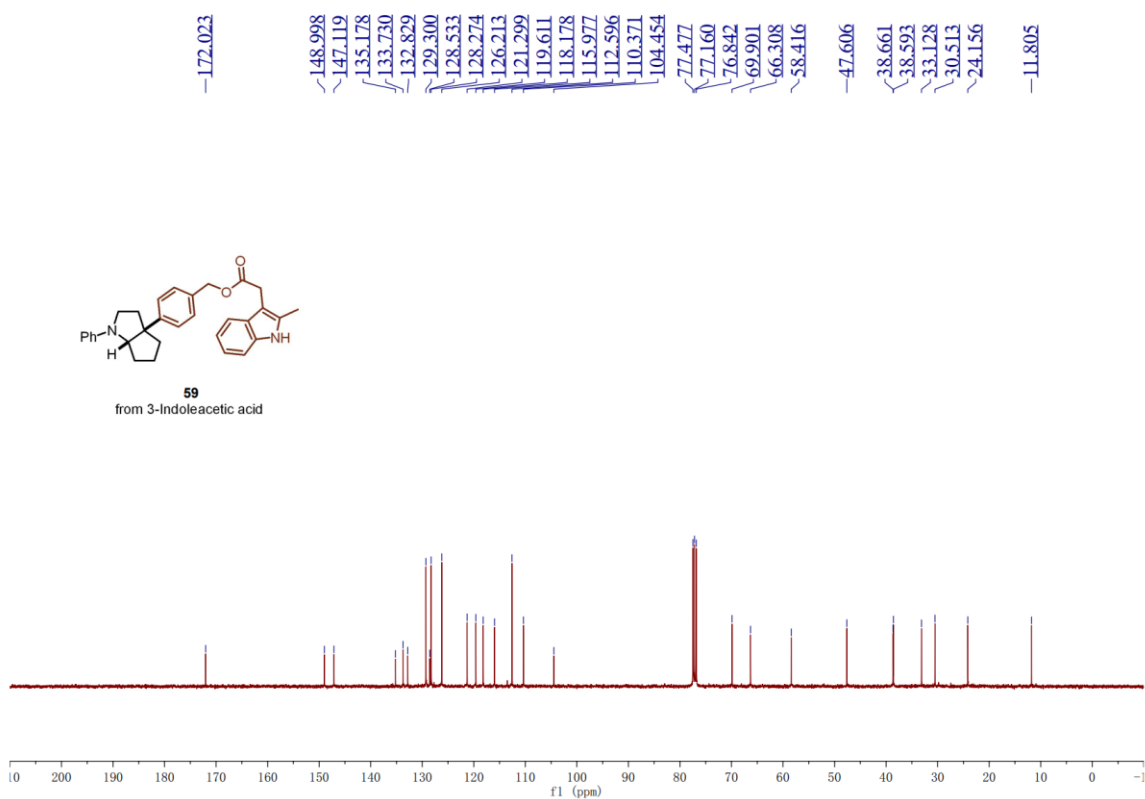

<sup>13</sup>C{<sup>1</sup>H} NMR Spectrum of Compound **59** (100 MHz, CDCl<sub>3</sub>)

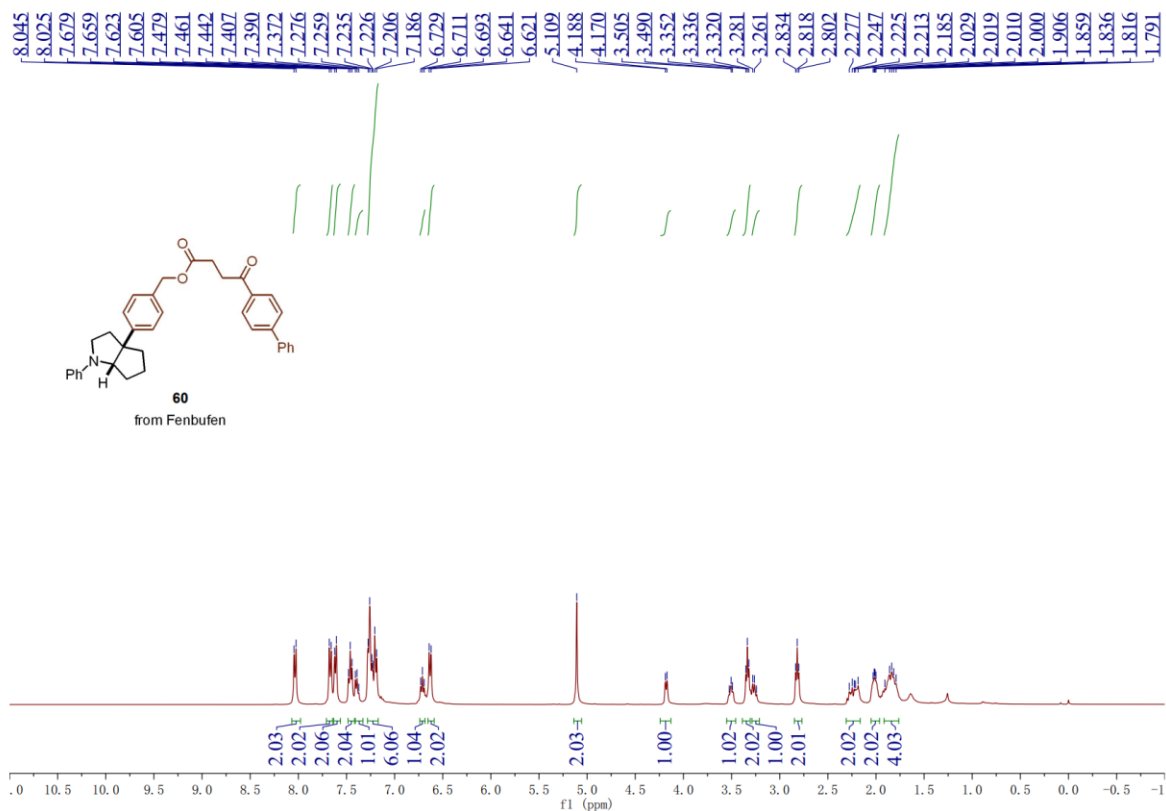

**<sup>1</sup>H NMR Spectrum of Compound **60** (400 MHz, CDCl<sub>3</sub>)**

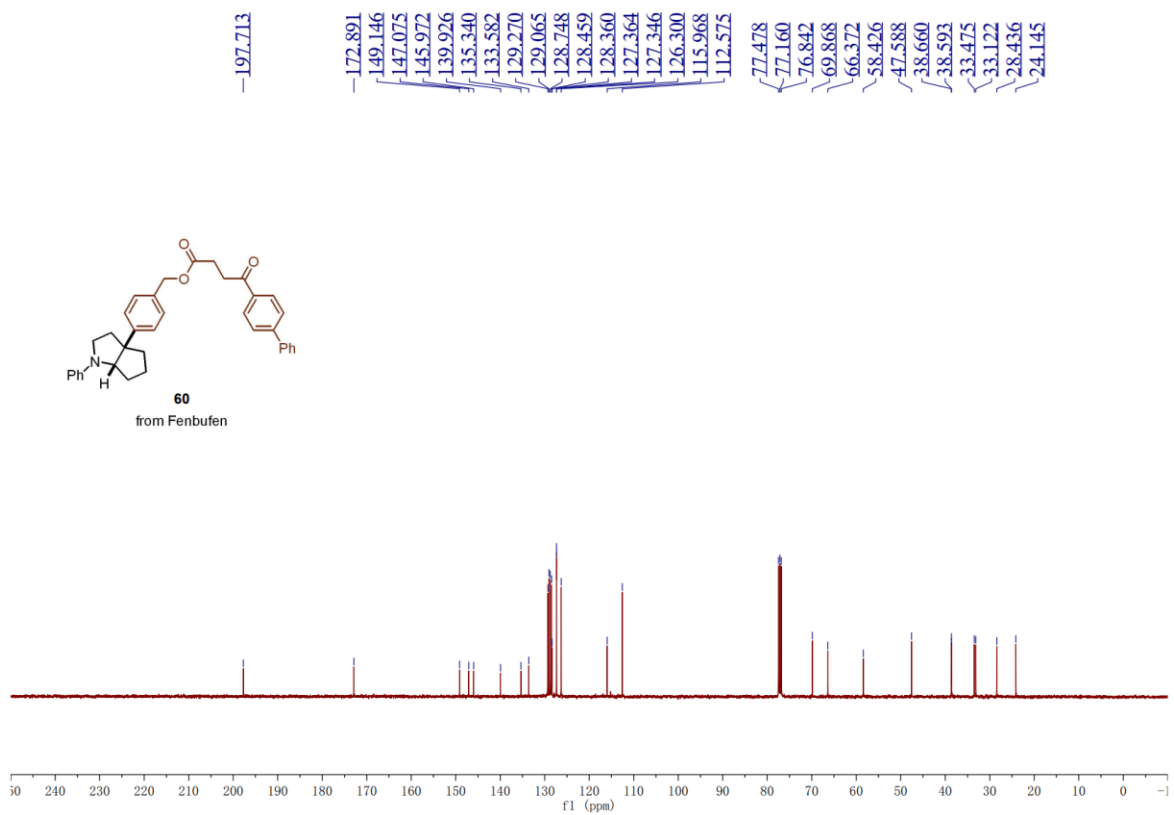

**<sup>13</sup>C{<sup>1</sup>H} NMR Spectrum of Compound **60** (100 MHz, CDCl<sub>3</sub>)**

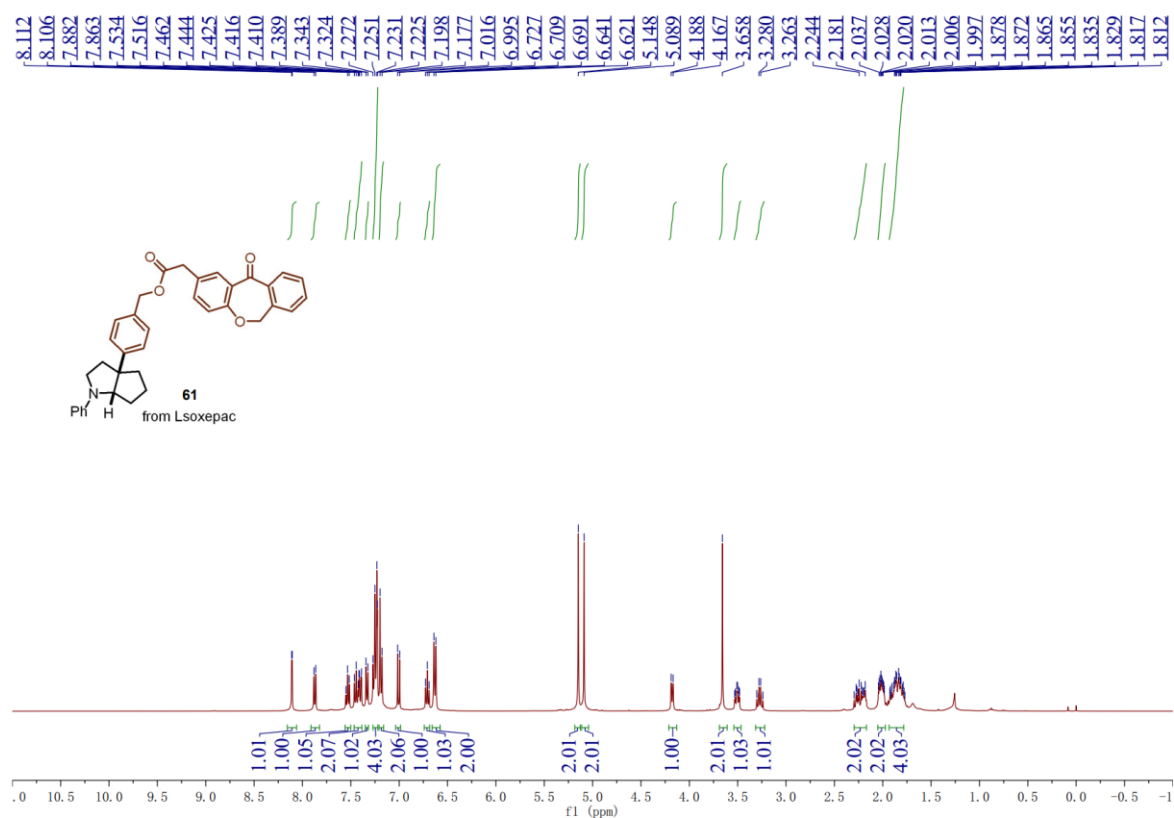

**<sup>1</sup>H NMR Spectrum of Compound **61** (400 MHz, CDCl<sub>3</sub>)**

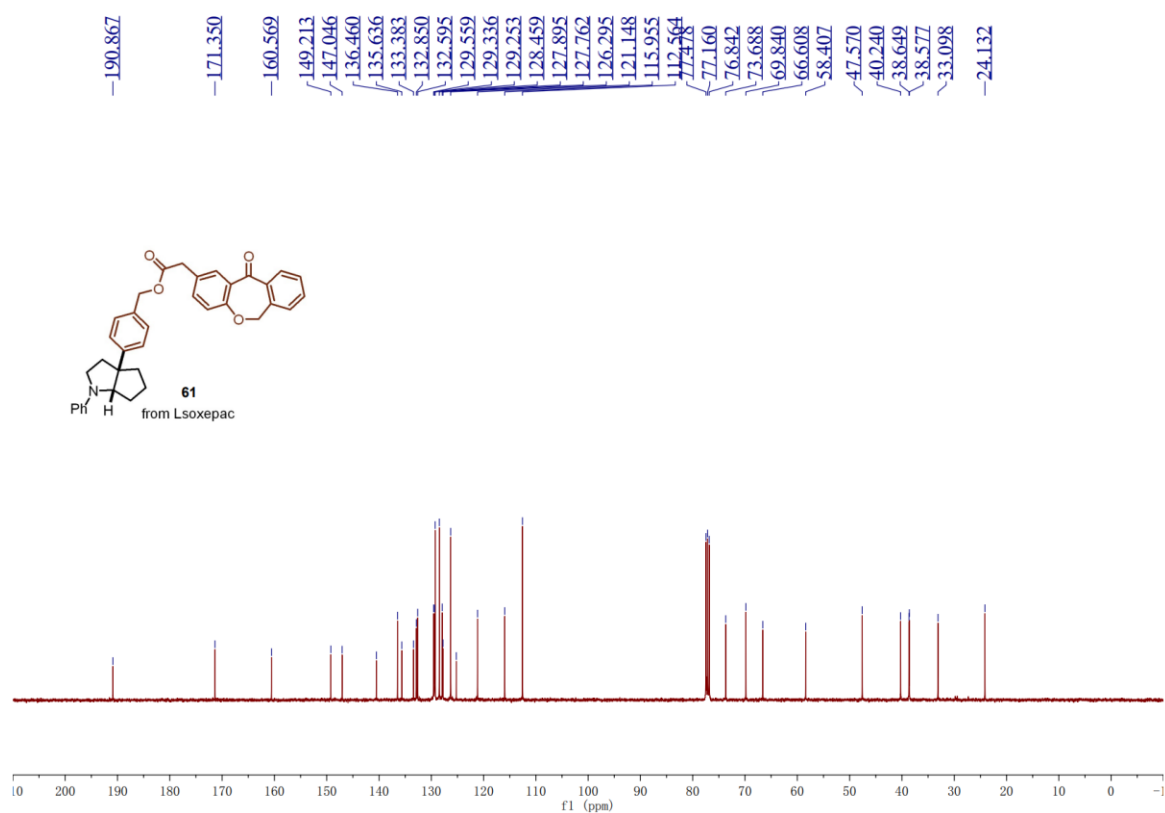

**<sup>13</sup>C{<sup>1</sup>H} NMR Spectrum of Compound **61** (100 MHz, CDCl<sub>3</sub>)**

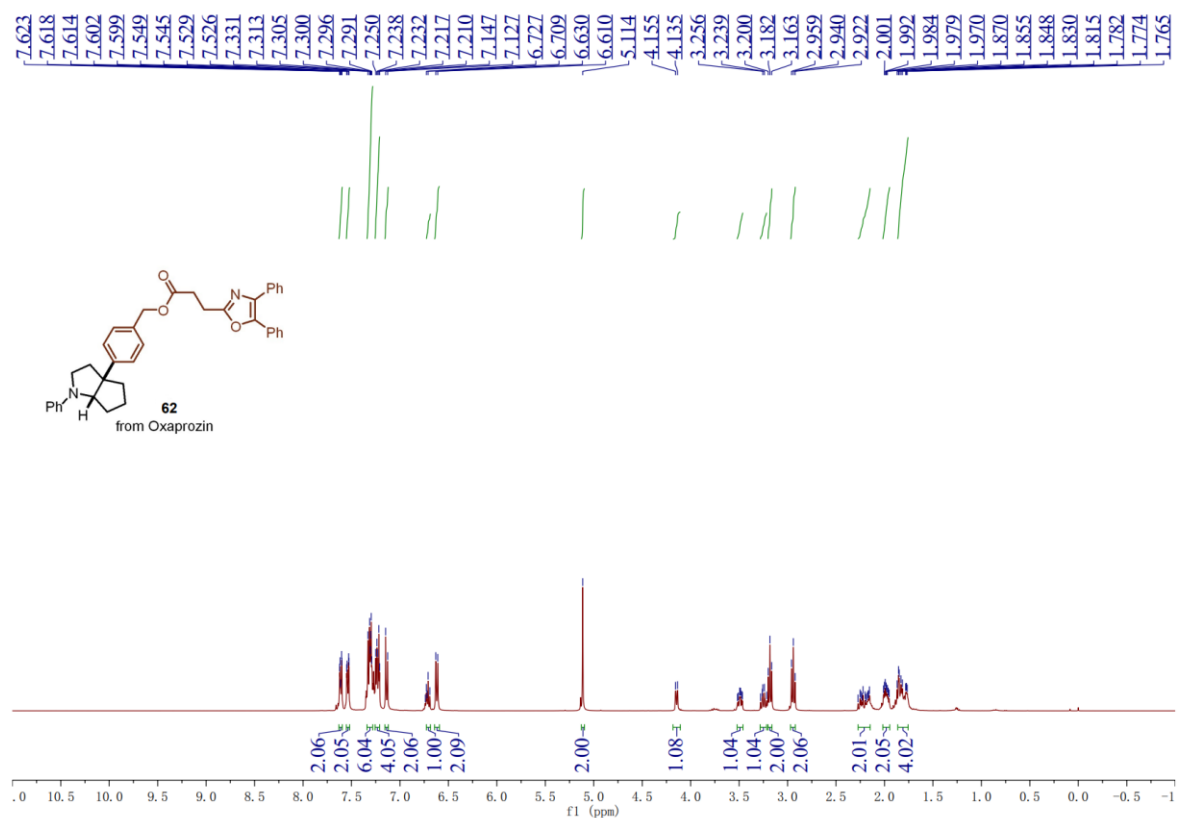

**<sup>1</sup>H NMR Spectrum of Compound **62** (400 MHz, CDCl<sub>3</sub>)**

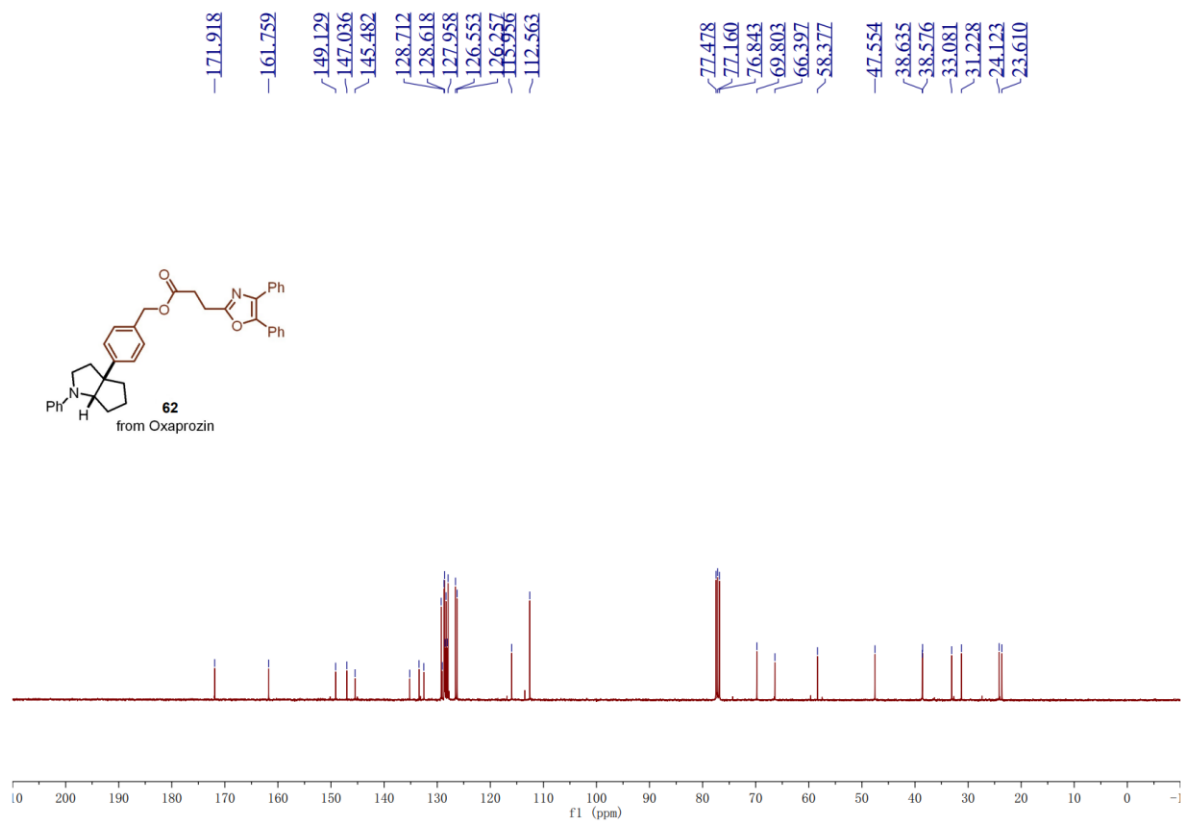

**<sup>13</sup>C {<sup>1</sup>H} NMR Spectrum of Compound **62** (100 MHz, CDCl<sub>3</sub>)**



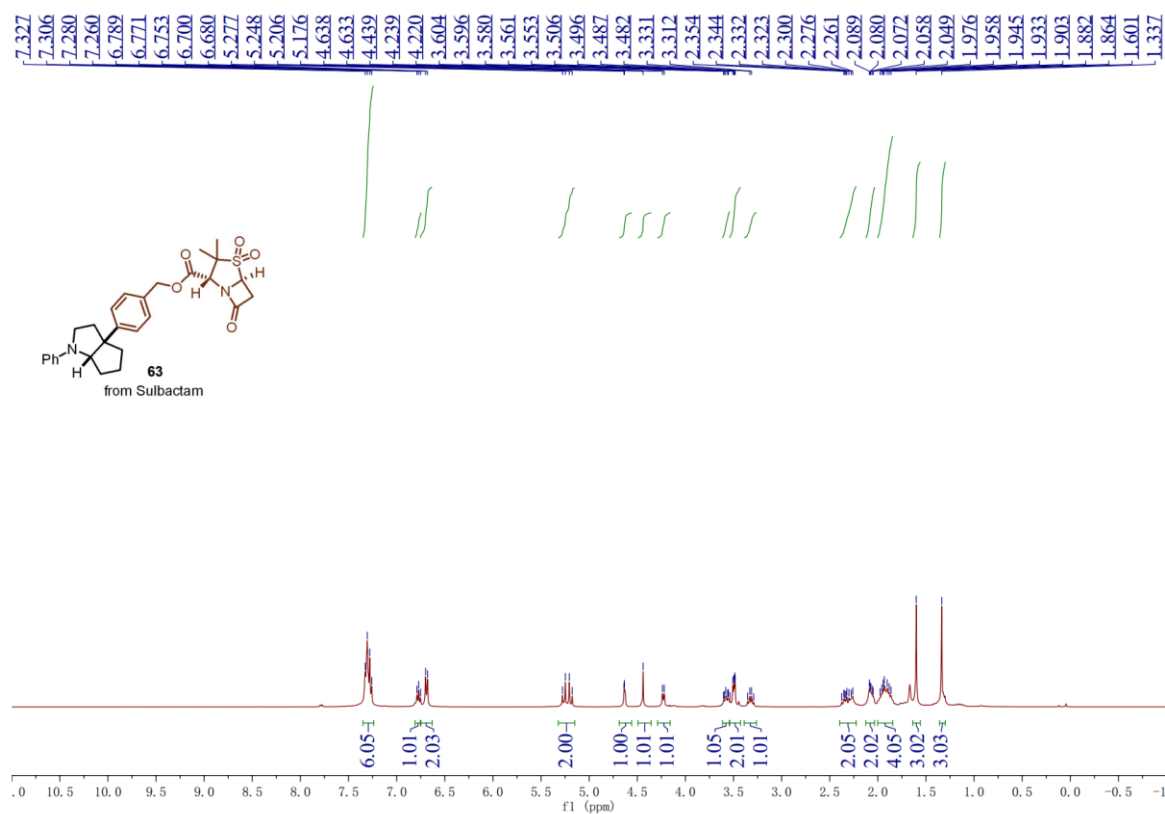

**<sup>1</sup>H NMR Spectrum of Compound **63** (400 MHz, CDCl<sub>3</sub>)**

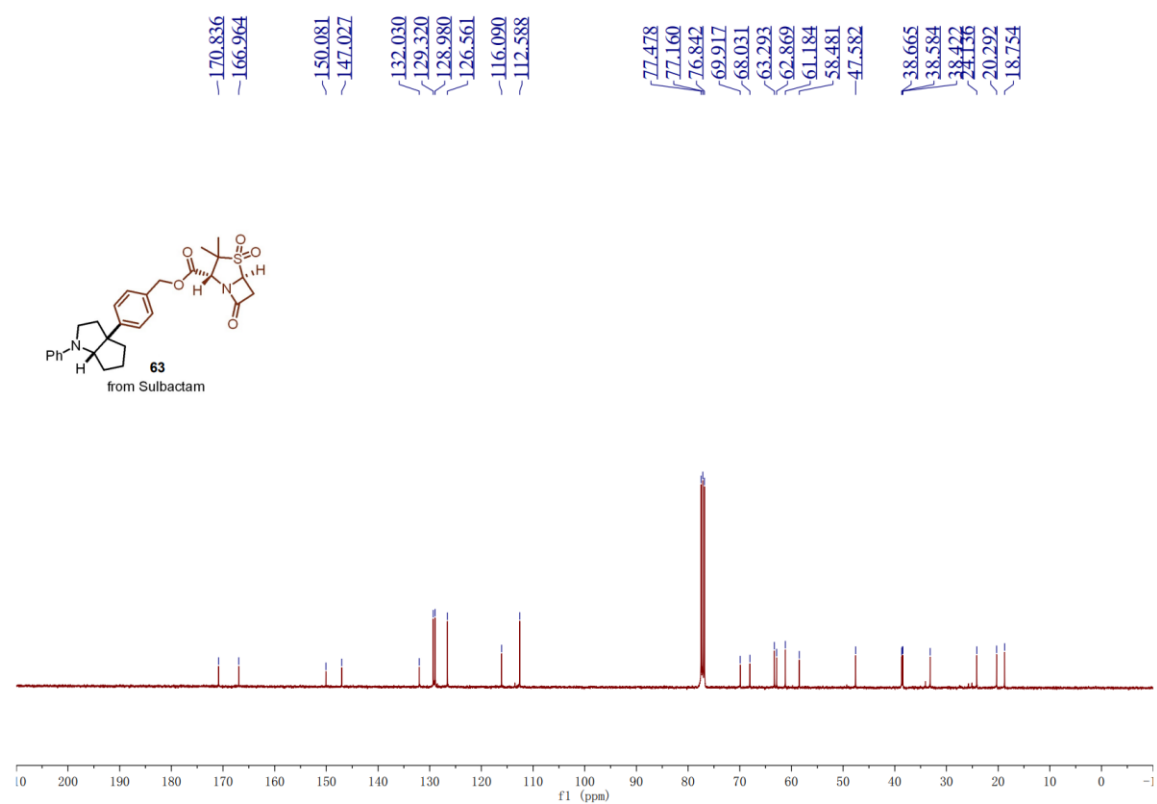

**<sup>13</sup>C{<sup>1</sup>H} NMR Spectrum of Compound **63** (100 MHz, CDCl<sub>3</sub>)**

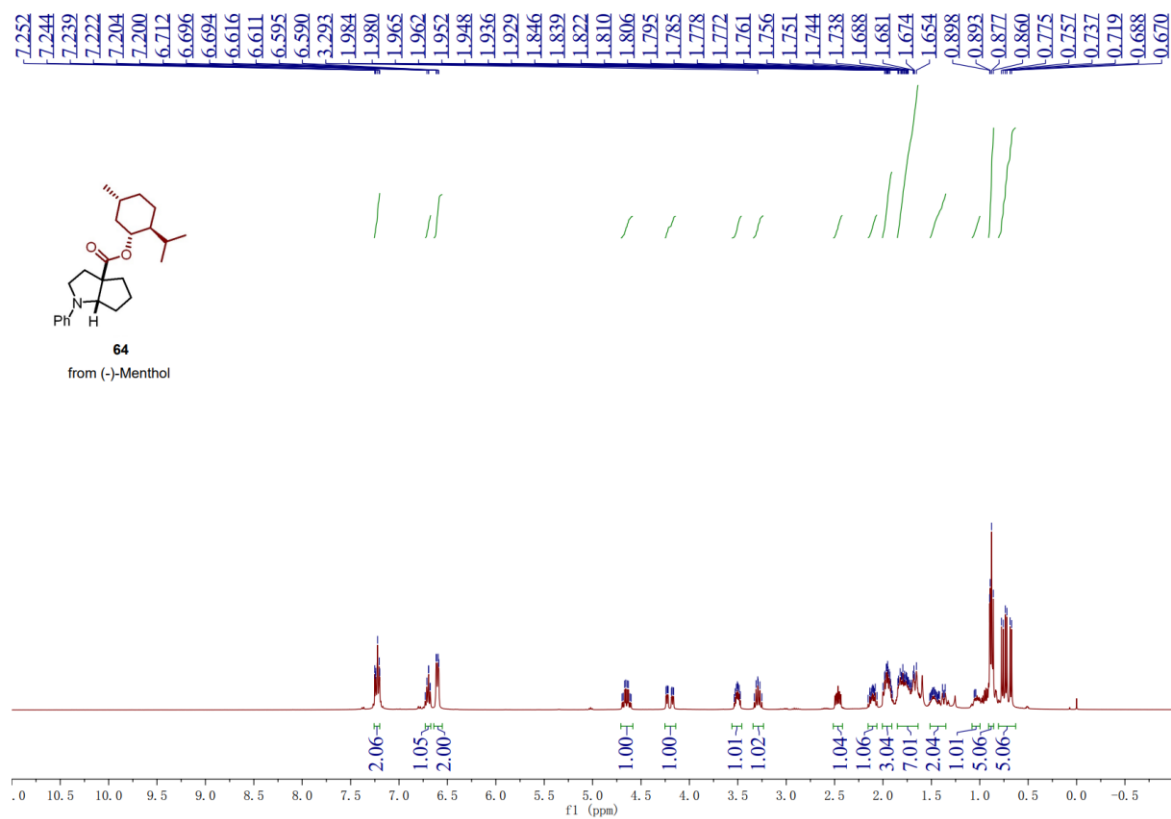

<sup>1</sup>H NMR Spectrum of Compound **64** (400 MHz, CDCl<sub>3</sub>)

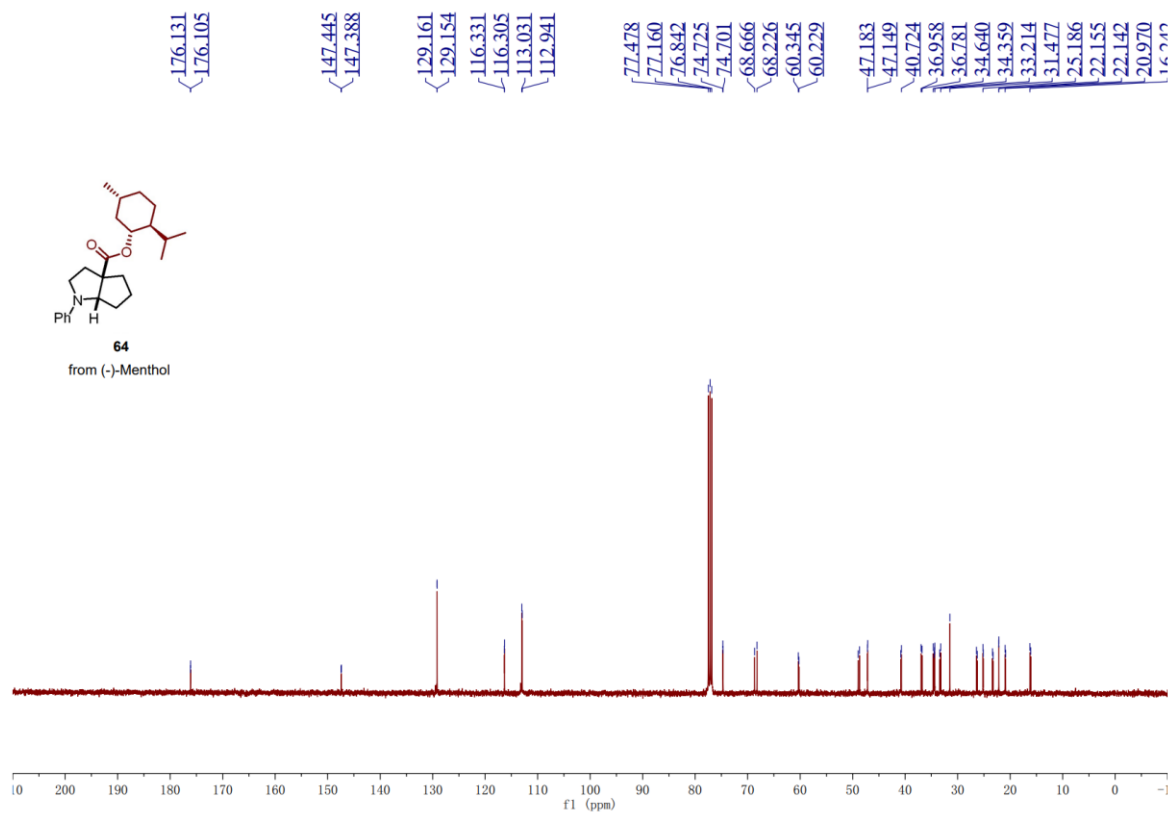

<sup>13</sup>C {<sup>1</sup>H} NMR Spectrum of Compound **64** (100 MHz, CDCl<sub>3</sub>)

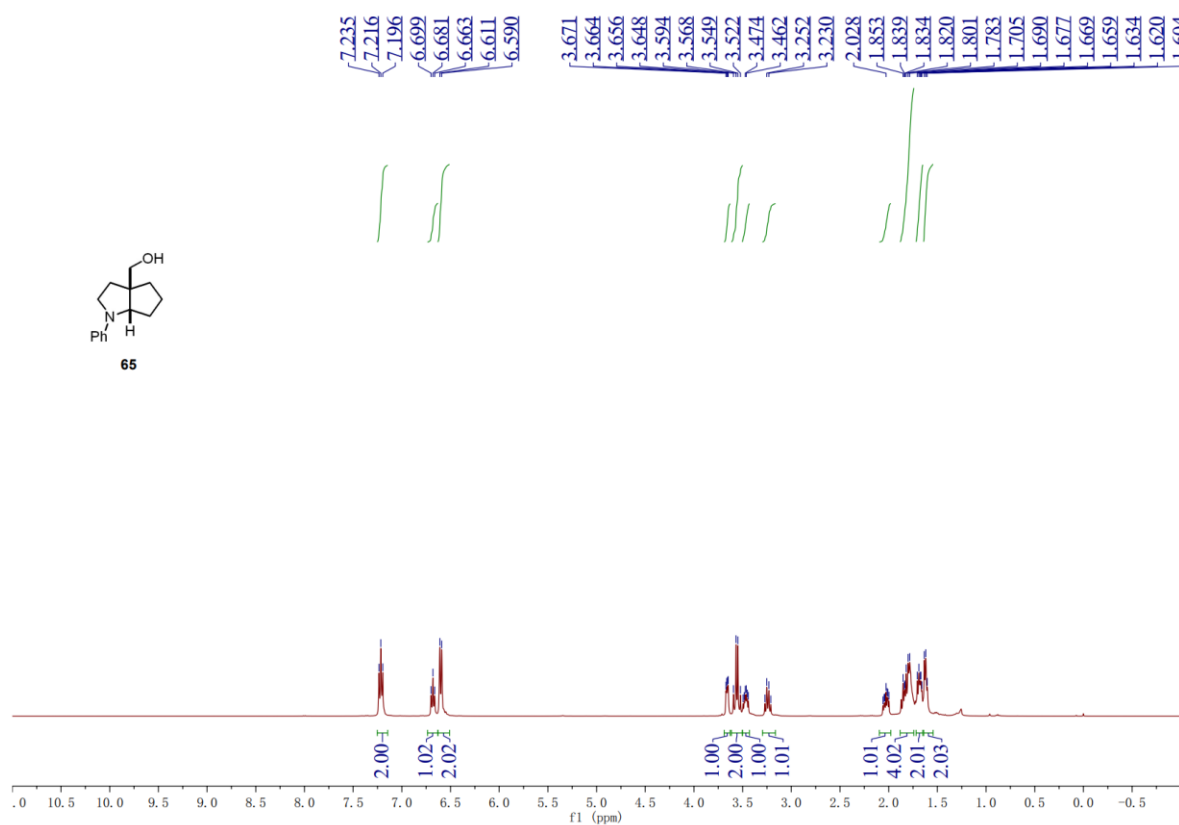

**<sup>1</sup>H NMR Spectrum of Compound **65** (400 MHz, CDCl<sub>3</sub>)**

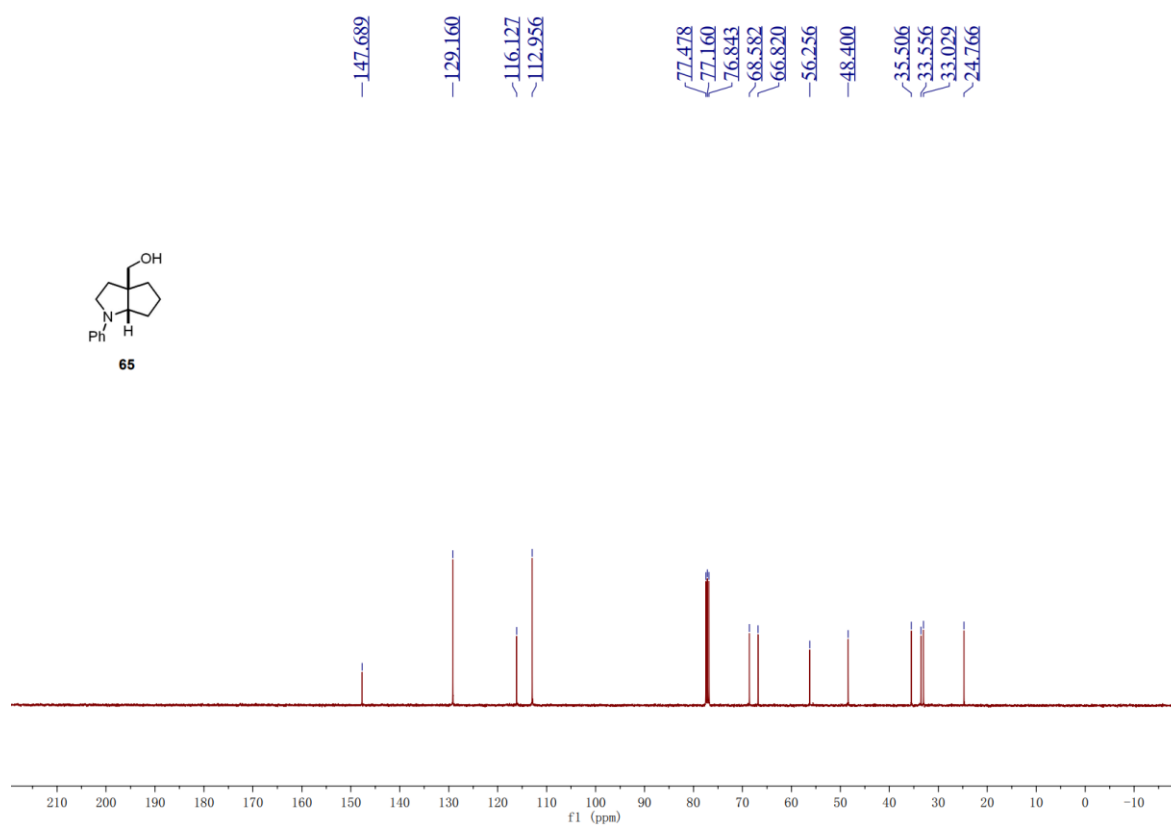

**<sup>13</sup>C{<sup>1</sup>H} NMR Spectrum of Compound **65** (100 MHz, CDCl<sub>3</sub>)**

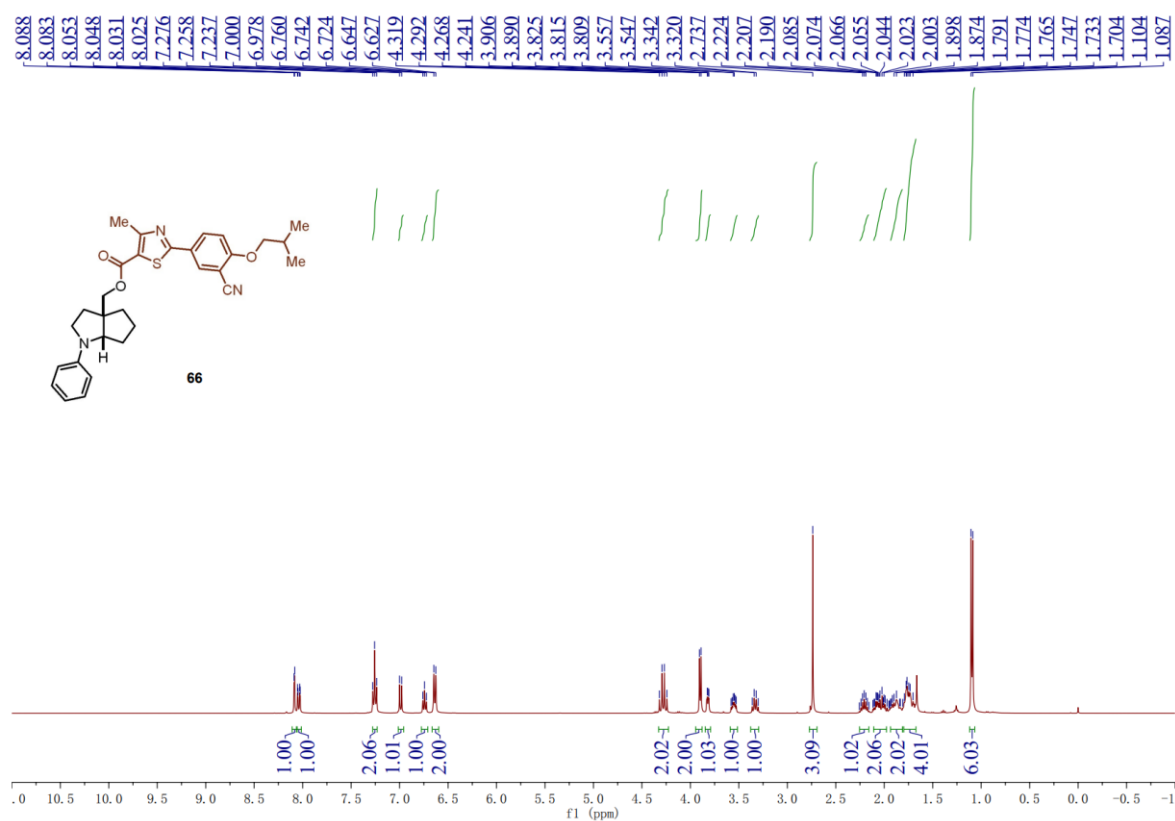

<sup>1</sup>H NMR Spectrum of Compound **66** (400 MHz, CDCl<sub>3</sub>)

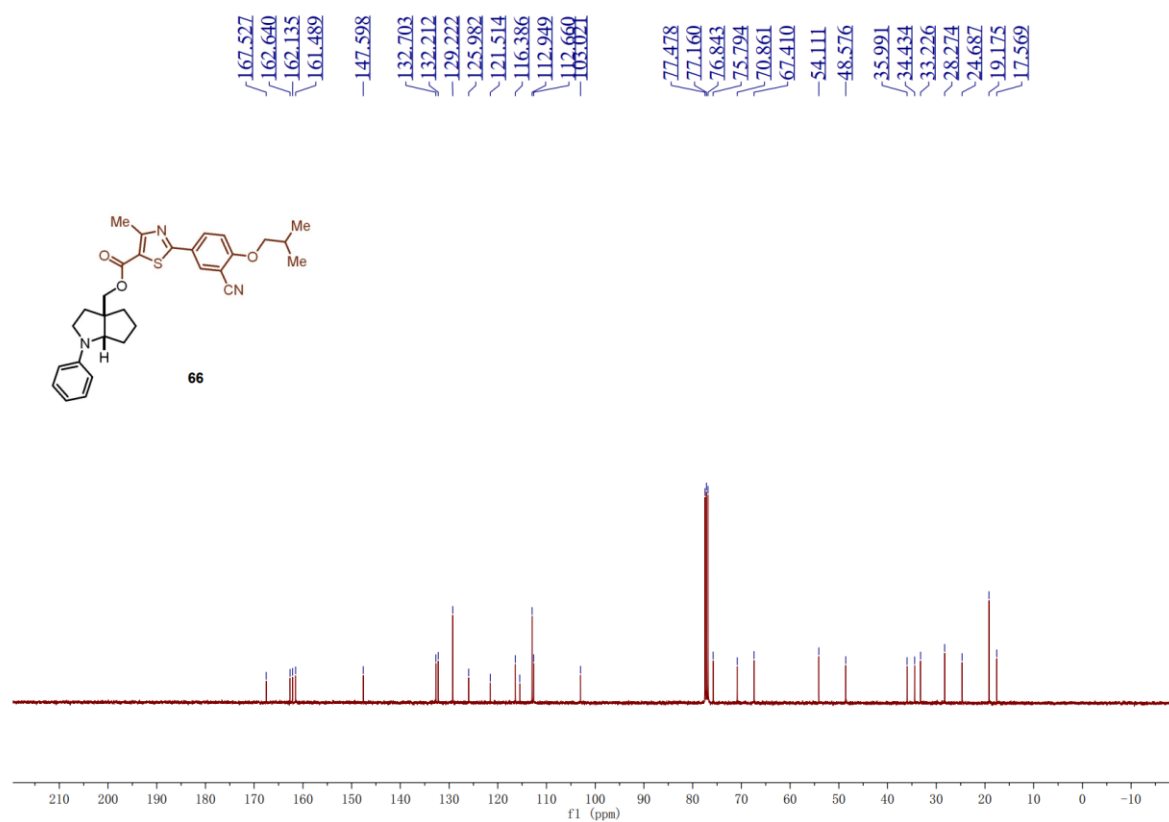

<sup>13</sup>C{<sup>1</sup>H} NMR Spectrum of Compound **66** (100 MHz, CDCl<sub>3</sub>)

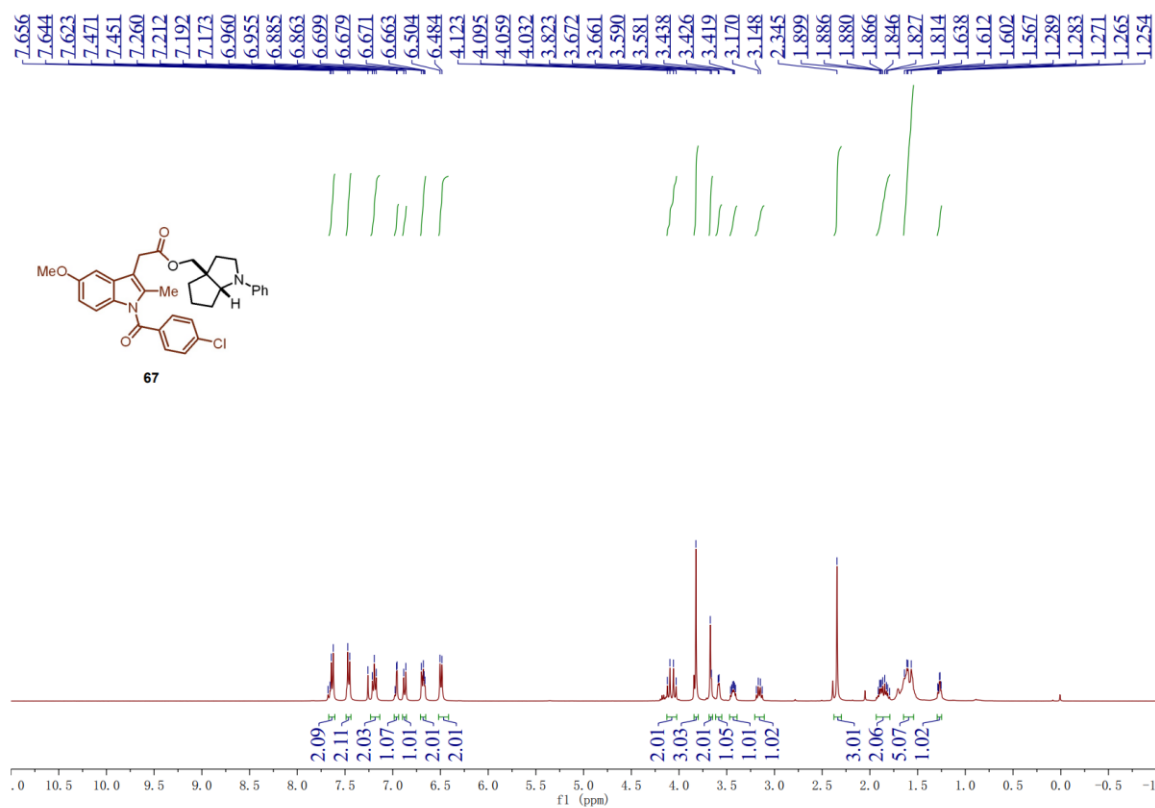

<sup>1</sup>H NMR Spectrum of Compound **67** (400 MHz, CDCl<sub>3</sub>)

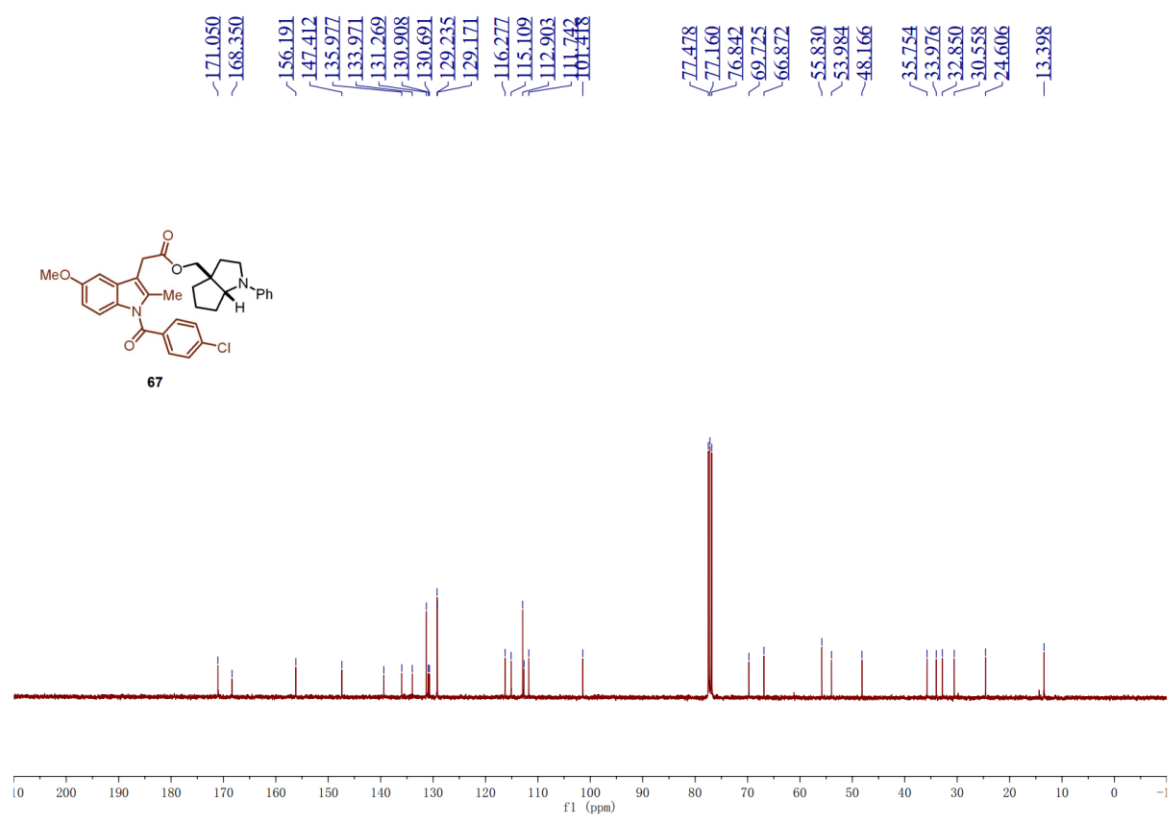

<sup>13</sup>C{<sup>1</sup>H} NMR Spectrum of Compound **67** (100 MHz, CDCl<sub>3</sub>)

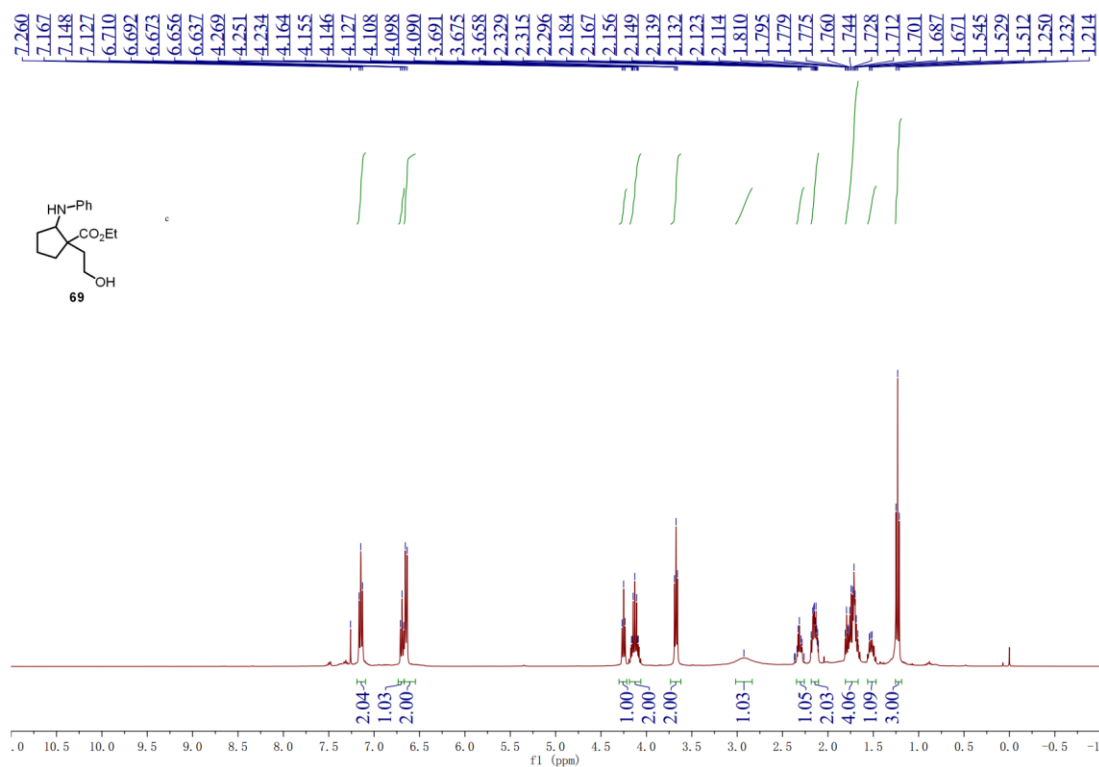

<sup>1</sup>H NMR Spectrum of Compound 69 (400 MHz, CDCl<sub>3</sub>)

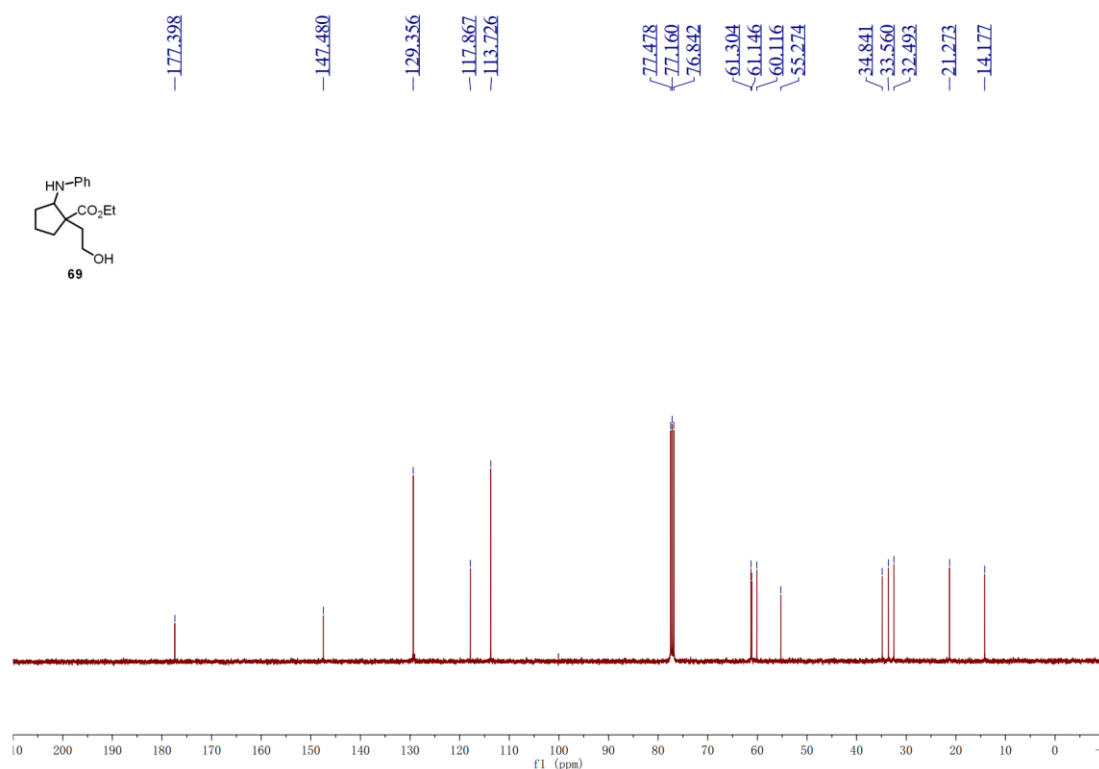

<sup>13</sup>C{<sup>1</sup>H} NMR Spectrum of Compound 69 (100 MHz, CDCl<sub>3</sub>)
